# Supplementary material for: Uncertainty of Prebiotic Scenarios: The Case of the Non-Enzymatic Reverse Tricarboxylic Acid Cycle
Source: PubMed Central journal article supplement — Sci Rep. 2015 Jan 26;5:8009. doi: 10.1038/srep08009 (PMC4306138; doi:10.1038/srep08009), 2015-01-26
Supplement: srep08009-s1.pdf [file srep08009-s1.pdf]

# Uncertainty of Prebiotic Scenarios: The Case of the Non-Enzymatic Reverse Tricarboxylic Acid Cycle

Dmitry Yu. Zubarev,\* Dmitrij Rappoport, Alan Aspuru-Guzik\*

*Department of Chemistry and Chemical Biology, Harvard University, 12 Oxford Street, Cambridge, MA 02138, USA.*

## Supplementary Information

### Computational Results

#### *Cycles found in the rTCA supernetwork that include acetate and/or glyoxylate (content of the file SI.tar.gz)*

Folder "SI" contains *graphml* files of 1881 cycles.

ASCII file *cycles\_SI* contains the following information:

- label (matching file names in SI folder ), number of branching points, number of molecules, "height" (G\_high-G\_low), "cost" (DG\_net), and list of all reactions (reaction sequence). The label of rTCA cycle is 64\_4\_3.
- In the reaction sequence each equation is followed by the label of the reaction type and Gibbs free energy of the reaction.
- The reaction sequence is followed by the net equation.

File *cycles\_Table\_SI.pdf* contains the same information except for the reaction sequences in a tabulated form.

#### *Degree distribution in the rTCA supernetwork.*

The degree distribution is characterized separately for the partition of molecules within the bi-partite graph and for its projection which is a single-mode graph. The latter is equivalent to the "interaction network" representation of a chemical network. Both distributions are heavy-tailed (Fig. S1); we relied on the methodology introduced in Ref. 21 in order to fit a power law to the dataset, assess the reliability of the fit, and compare the power law to alternative distributions, such as the log-normal, stretched exponential, and a power law with exponential cut-off (Table S1).

Following the methodology of Ref. 21 we conclude that there is a possibility for alternatives, such as the log-normal distribution, but the power-law is a good fit with exponents of 5.7 and 3.82 for the partition in the bi-partite graph and its projection, respectively.

---

\* To whom correspondence should be addressed. E-mail: [zubarev@fas.harvard.edu](mailto:zubarev@fas.harvard.edu) and [aspuru@chemistry.harvard.edu](mailto:aspuru@chemistry.harvard.edu).

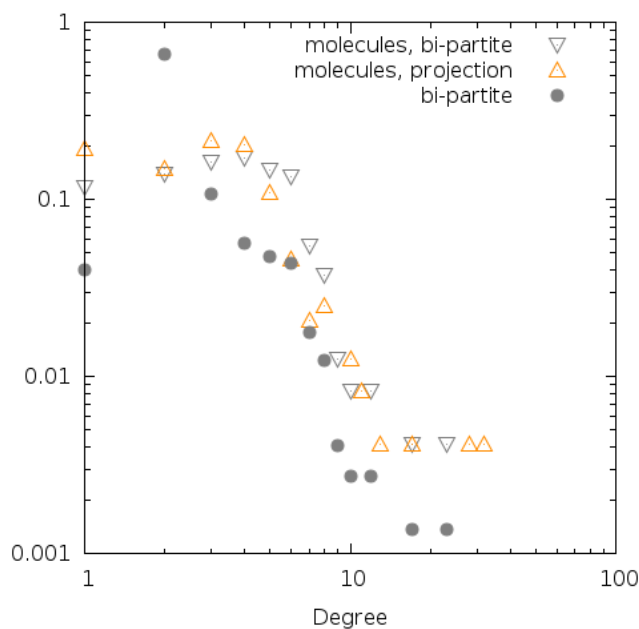

**Figure S1.** Degree distribution in the M-rTCA network (Fig. 2B). The filled circles represent the degree distribution for both partitions (molecules and reactions) of the bi-partite graph. The empty triangles pointing down represent the degree distribution in the partition of molecules in the bi-partite graph. Finally, the empty triangles pointing down represent the degree distribution in the projected partition of molecules.

Notably, acetate, which served as a starting point of the reconstruction process, has only the second largest degree with 14 incoming and 3 outgoing connections. It is glyoxylate that emerges as the most connected component with 18 incoming and 4 outgoing connections. Both molecules are the most frequent products in the network due to cleavage reactions (Fig. 1B). As far as the molecules undergoing cleavage reactions, hydroxycitrate is involved in 3 of them. This is the the highest number of cleavage reactions for a molecule. Citrate, along with 46 other molecules, has only 1 cleavage channel.

**Table S1.** Comparison of the fitted power-law behavior against alternatives for degree distribution in the molecular partition and its projection. For the power law, p-value *above 0.1* indicates significance of the fit. For the alternatives, positive log-likelihood ratios LR indicate that power law is favored over the alternative. Significance of the likelihood ratio test is given by p-value that has to be *below 0.1* for LR test to be significant.

|                | Power law<br>$p$ | Log-normal<br>$LR/p$ | Exponential<br>$LR/p$ | Stretched exp.<br>$LR/p$ | PL + exp. cutoff<br>$LR/p$ |
|----------------|------------------|----------------------|-----------------------|--------------------------|----------------------------|
| Mol. partition | 0.84             | -1.18/0.24           | 1.08/0.28             | 0.01/0.93                | 0.00/1.0                   |
| Projection     | 0.78             | -0.63/0.53           | 1.45/0.15             | 0.01/0.93                | -                          |

***Distribution of the “cycle cost” defined as the net change of Gibbs free energy along the cycle***

Various approaches can be used to characterize the “uniqueness” of the rTCA cycle; in the following section we consider z-

score as an example. The Z-score is defined as

$$z = \frac{x - \mu}{\sigma} \quad (1)$$

where  $z$  is z-score of the datum  $x$  in the population with mean  $\mu$  and standard deviation  $\sigma$ . For the population of cycle cost (see Fig. 3A) the z-score of rTCA cycle is 1.35 meaning that its cost is 1.35 standard deviations above the mean. We assess the modification of z-score in this data-set assuming variability of the redox conditions that translates into the shifts of redox potentials and free energies of redox reactions. The sensitive reaction types are reductive carboxylation (Eq. 1), carbonyl reduction (Eq. 3), and double bond reduction (Eq. 4). The latter two processes are of comparable mechanistic complexity; the former includes multiple steps. Therefore, we introduce one shift parameter to account for the conditions of reductive carboxylation and another shift parameter to account for the conditions of carbonyl and double bond reduction. Cycles have different number of redox reactions of each type, for example there are 2 reductive carboxylation steps in rTCA cycle and total of 3 simple reductive steps, 2 carbonyl and 1 double bond reduction reactions. Distribution of cycle cost will change its shape as redox conditions change, along with the z-score of rTCA cycle (Fig. S2). The “uniqueness” of rTCA cycle increases faster as free energies of simple reduction steps become more positive.

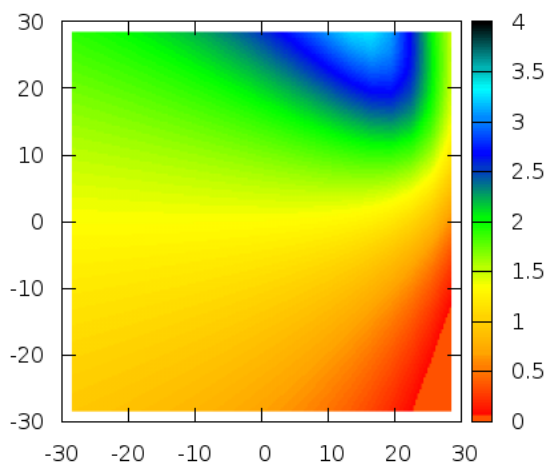

**Figure S2.** Sensitivity of z-score of rTCA cycle (color map) to the shift of free energies of reactions of reductive carboxylation along the horizontal axis ( $\Delta G$ , kcal/mol) and double bond and carbonyl reduction along the vertical axis ( $\Delta G$ , kcal/mol)

## References

21. Virkar, Y. & Clauset, A. Power-law distributions in binned empirical data *Ann. Appl. Stat.* **8**, 89-119 (2014).

(1) Reductive Carboxylation

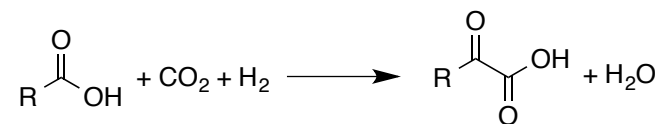

(2) Carboxylation

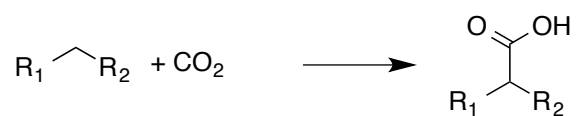

(3) Carbonyl Reduction

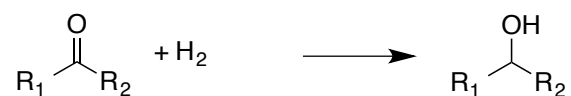

(4) Alkene Reduction

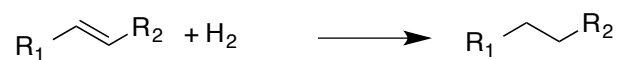

(5) Dehydration

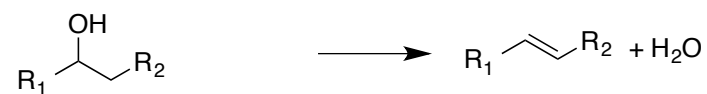

(6) Hydration

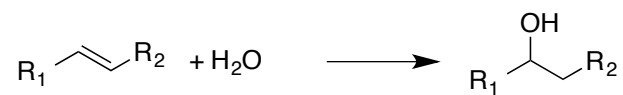

(7) Cleavage

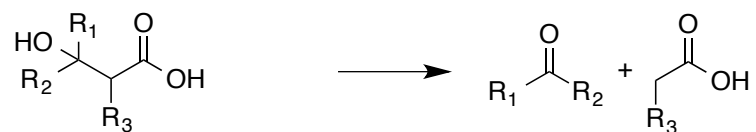

Scheme S1: Reaction types of the reverse tricarboxylic acid cycle.

Table S2: Characteristics of reaction cycles consistent with reaction types (1)–(7) of the reverse tricarboxylic acid cycle.  $n_M$ : Number of molecules,  $n_B$ : number of branching points,  $E_H$ : height of the reaction cycle (see main text), kcal/mol,  $E_C$ : cost of the reaction cycle (see main text), kcal/mol.

| Label   | $n_M$ | $n_B$ | $E_C$  | $E_H$ | Net reaction                                                                                                                             |
|---------|-------|-------|--------|-------|------------------------------------------------------------------------------------------------------------------------------------------|
| 64_4_1  | 11    | 1     | -77.5  | 53.3  | $4 \text{ CO}_2 + 5 \text{ H}_2 \rightarrow 3 \text{ H}_2\text{O} + \text{OC}(=\text{O})\text{CC}(=\text{O})\text{C}(=\text{O})\text{O}$ |
| 64_4_2  | 11    | 1     | -77.5  | 53.3  | $4 \text{ CO}_2 + 5 \text{ H}_2 \rightarrow 3 \text{ H}_2\text{O} + \text{OC}(=\text{O})\text{CC}(=\text{O})\text{C}(=\text{O})\text{O}$ |
| 64_4_3  | 11    | 1     | -77.5  | 43.7  | $4 \text{ CO}_2 + 5 \text{ H}_2 \rightarrow 3 \text{ H}_2\text{O} + \text{OC}(=\text{O})\text{CC}(=\text{O})\text{C}(=\text{O})\text{O}$ |
| 64_4_4  | 11    | 1     | -77.5  | 43.7  | $4 \text{ CO}_2 + 5 \text{ H}_2 \rightarrow 3 \text{ H}_2\text{O} + \text{OC}(=\text{O})\text{CC}(=\text{O})\text{C}(=\text{O})\text{O}$ |
| 64_4_5  | 11    | 1     | -77.5  | 40.1  | $4 \text{ CO}_2 + 5 \text{ H}_2 \rightarrow 3 \text{ H}_2\text{O} + \text{OC}(=\text{O})\text{CC}(=\text{O})\text{C}(=\text{O})\text{O}$ |
| 64_4_6  | 11    | 1     | -77.5  | 41.2  | $4 \text{ CO}_2 + 5 \text{ H}_2 \rightarrow 3 \text{ H}_2\text{O} + \text{OC}(=\text{O})\text{CC}(=\text{O})\text{C}(=\text{O})\text{O}$ |
| 64_10_1 | 16    | 0     | -181.7 | 37.8  | $4 \text{ CO}_2 + 10 \text{ H}_2 \rightarrow 6 \text{ H}_2\text{O} + \text{CCC}=\text{O} + \text{C}=\text{O}$                            |
| 64_10_2 | 16    | 0     | -170.9 | 37.8  | $4 \text{ CO}_2 + 9 \text{ H}_2 \rightarrow 5 \text{ H}_2\text{O} + \text{CCC}=\text{O} + \text{OC}=\text{O}$                            |
| 64_10_3 | 16    | 0     | -181.7 | 33.5  | $4 \text{ CO}_2 + 10 \text{ H}_2 \rightarrow 6 \text{ H}_2\text{O} + \text{CCC}=\text{O} + \text{C}=\text{O}$                            |
| 64_10_4 | 16    | 0     | -170.9 | 33.5  | $4 \text{ CO}_2 + 9 \text{ H}_2 \rightarrow 5 \text{ H}_2\text{O} + \text{CCC}=\text{O} + \text{OC}=\text{O}$                            |
| 64_10_5 | 16    | 0     | -181.7 | 34.0  | $4 \text{ CO}_2 + 10 \text{ H}_2 \rightarrow 6 \text{ H}_2\text{O} + \text{CCC}=\text{O} + \text{C}=\text{O}$                            |
| 64_10_6 | 16    | 0     | -170.9 | 34.0  | $4 \text{ CO}_2 + 9 \text{ H}_2 \rightarrow 5 \text{ H}_2\text{O} + \text{CCC}=\text{O} + \text{OC}=\text{O}$                            |
| 64_10_7 | 16    | 0     | -181.7 | 37.8  | $4 \text{ CO}_2 + 10 \text{ H}_2 \rightarrow 6 \text{ H}_2\text{O} + \text{CCC}=\text{O} + \text{C}=\text{O}$                            |
| 64_10_8 | 16    | 0     | -170.9 | 37.8  | $4 \text{ CO}_2 + 9 \text{ H}_2 \rightarrow 5 \text{ H}_2\text{O} + \text{CCC}=\text{O} + \text{OC}=\text{O}$                            |
| 64_10_9 | 16    | 0     | -181.7 | 33.5  | $4 \text{ CO}_2 + 10 \text{ H}_2 \rightarrow 6 \text{ H}_2\text{O} + \text{CCC}=\text{O} + \text{C}=\text{O}$                            |

| Label    | $n_M$ | $n_B$ | $E_C$  | $E_H$ | Net reaction                                                                                                  |
|----------|-------|-------|--------|-------|---------------------------------------------------------------------------------------------------------------|
| 64_10_10 | 16    | 0     | -170.9 | 33.5  | $4 \text{ CO}_2 + 9 \text{ H}_2 \rightarrow 5 \text{ H}_2\text{O} + \text{CCC}=\text{O} + \text{OC}=\text{O}$ |
| 64_10_11 | 16    | 0     | -181.7 | 34.0  | $4 \text{ CO}_2 + 10 \text{ H}_2 \rightarrow 6 \text{ H}_2\text{O} + \text{CCC}=\text{O} + \text{C}=\text{O}$ |
| 64_10_12 | 16    | 0     | -170.9 | 34.0  | $4 \text{ CO}_2 + 9 \text{ H}_2 \rightarrow 5 \text{ H}_2\text{O} + \text{CCC}=\text{O} + \text{OC}=\text{O}$ |
| 64_10_13 | 16    | 0     | -181.7 | 39.2  | $4 \text{ CO}_2 + 10 \text{ H}_2 \rightarrow 6 \text{ H}_2\text{O} + \text{CCC}=\text{O} + \text{C}=\text{O}$ |
| 64_10_14 | 16    | 0     | -170.9 | 39.2  | $4 \text{ CO}_2 + 9 \text{ H}_2 \rightarrow 5 \text{ H}_2\text{O} + \text{CCC}=\text{O} + \text{OC}=\text{O}$ |
| 64_10_15 | 16    | 0     | -181.7 | 39.2  | $4 \text{ CO}_2 + 10 \text{ H}_2 \rightarrow 6 \text{ H}_2\text{O} + \text{CCC}=\text{O} + \text{C}=\text{O}$ |
| 64_10_16 | 16    | 0     | -170.9 | 39.2  | $4 \text{ CO}_2 + 9 \text{ H}_2 \rightarrow 5 \text{ H}_2\text{O} + \text{CCC}=\text{O} + \text{OC}=\text{O}$ |
| 64_10_17 | 16    | 0     | -181.7 | 39.2  | $4 \text{ CO}_2 + 10 \text{ H}_2 \rightarrow 6 \text{ H}_2\text{O} + \text{CCC}=\text{O} + \text{C}=\text{O}$ |
| 64_10_18 | 16    | 0     | -170.9 | 39.2  | $4 \text{ CO}_2 + 9 \text{ H}_2 \rightarrow 5 \text{ H}_2\text{O} + \text{CCC}=\text{O} + \text{OC}=\text{O}$ |
| 64_10_19 | 16    | 0     | -181.7 | 39.2  | $4 \text{ CO}_2 + 10 \text{ H}_2 \rightarrow 6 \text{ H}_2\text{O} + \text{CCC}=\text{O} + \text{C}=\text{O}$ |
| 64_10_20 | 16    | 0     | -170.9 | 39.2  | $4 \text{ CO}_2 + 9 \text{ H}_2 \rightarrow 5 \text{ H}_2\text{O} + \text{CCC}=\text{O} + \text{OC}=\text{O}$ |
| 64_10_21 | 16    | 0     | -181.7 | 39.2  | $4 \text{ CO}_2 + 10 \text{ H}_2 \rightarrow 6 \text{ H}_2\text{O} + \text{CCC}=\text{O} + \text{C}=\text{O}$ |
| 64_10_22 | 16    | 0     | -170.9 | 39.2  | $4 \text{ CO}_2 + 9 \text{ H}_2 \rightarrow 5 \text{ H}_2\text{O} + \text{CCC}=\text{O} + \text{OC}=\text{O}$ |
| 64_10_23 | 16    | 0     | -181.7 | 39.2  | $4 \text{ CO}_2 + 10 \text{ H}_2 \rightarrow 6 \text{ H}_2\text{O} + \text{CCC}=\text{O} + \text{C}=\text{O}$ |
| 64_10_24 | 16    | 0     | -170.9 | 39.2  | $4 \text{ CO}_2 + 9 \text{ H}_2 \rightarrow 5 \text{ H}_2\text{O} + \text{CCC}=\text{O} + \text{OC}=\text{O}$ |
| 64_10_25 | 16    | 0     | -181.7 | 40.1  | $4 \text{ CO}_2 + 10 \text{ H}_2 \rightarrow 6 \text{ H}_2\text{O} + \text{CCC}=\text{O} + \text{C}=\text{O}$ |
| 64_10_26 | 16    | 0     | -170.9 | 40.1  | $4 \text{ CO}_2 + 9 \text{ H}_2 \rightarrow 5 \text{ H}_2\text{O} + \text{CCC}=\text{O} + \text{OC}=\text{O}$ |
| 64_10_27 | 16    | 0     | -181.7 | 40.1  | $4 \text{ CO}_2 + 10 \text{ H}_2 \rightarrow 6 \text{ H}_2\text{O} + \text{CCC}=\text{O} + \text{C}=\text{O}$ |

| Label    | $n_M$ | $n_B$ | $E_C$  | $E_H$ | Net reaction                                                                                                                                                                                                                                                                                                                      |
|----------|-------|-------|--------|-------|-----------------------------------------------------------------------------------------------------------------------------------------------------------------------------------------------------------------------------------------------------------------------------------------------------------------------------------|
| 64_10_28 | 16    | 0     | -170.9 | 40.1  | $4 \text{ CO}_2 + 9 \text{ H}_2 \rightarrow 5 \text{ H}_2\text{O} + \text{CCC}=\text{O} + \text{OC}=\text{O}$                                                                                                                                                                                                                     |
| 64_10_29 | 16    | 0     | -181.7 | 40.1  | $4 \text{ CO}_2 + 10 \text{ H}_2 \rightarrow 6 \text{ H}_2\text{O} + \text{CCC}=\text{O} + \text{C}=\text{O}$                                                                                                                                                                                                                     |
| 64_10_30 | 16    | 0     | -170.9 | 40.1  | $4 \text{ CO}_2 + 9 \text{ H}_2 \rightarrow 5 \text{ H}_2\text{O} + \text{CCC}=\text{O} + \text{OC}=\text{O}$                                                                                                                                                                                                                     |
| 64_10_31 | 16    | 0     | -181.7 | 40.7  | $4 \text{ CO}_2 + 10 \text{ H}_2 \rightarrow 6 \text{ H}_2\text{O} + \text{CCC}=\text{O} + \text{C}=\text{O}$                                                                                                                                                                                                                     |
| 64_10_32 | 16    | 0     | -170.9 | 40.7  | $4 \text{ CO}_2 + 9 \text{ H}_2 \rightarrow 5 \text{ H}_2\text{O} + \text{CCC}=\text{O} + \text{OC}=\text{O}$                                                                                                                                                                                                                     |
| 64_18_1  | 19    | 0     | -161.2 | 37.8  | $5 \text{ CO}_2 + 10 \text{ H}_2 \rightarrow 5 \text{ H}_2\text{O} + \text{OCC}(=\text{O})\text{O} + \text{CC}=\text{O} + \text{C}=\text{O}$                                                                                                                                                                                      |
| 64_18_2  | 19    | 0     | -161.2 | 33.5  | $5 \text{ CO}_2 + 10 \text{ H}_2 \rightarrow 5 \text{ H}_2\text{O} + \text{OCC}(=\text{O})\text{O} + \text{CC}=\text{O} + \text{C}=\text{O}$                                                                                                                                                                                      |
| 64_18_3  | 19    | 0     | -161.2 | 34.0  | $5 \text{ CO}_2 + 10 \text{ H}_2 \rightarrow 5 \text{ H}_2\text{O} + \text{OCC}(=\text{O})\text{O} + \text{CC}=\text{O} + \text{C}=\text{O}$                                                                                                                                                                                      |
| 64_21_1  | 14    | 2     | -113.1 | 50.8  | $6 \text{ CO}_2 + 8 \text{ H}_2 \rightarrow \text{CC}(=\text{O})\text{O} + \text{OC}(=\text{O})\text{C}(=\text{O})\text{C}(\text{C}(=\text{O})\text{O})\text{O} + 4 \text{ H}_2\text{O}$                                                                                                                                          |
| 64_21_2  | 14    | 2     | -113.1 | 52.6  | $6 \text{ CO}_2 + 8 \text{ H}_2 \rightarrow \text{CC}(=\text{O})\text{O} + \text{OC}(=\text{O})\text{C}(=\text{O})\text{C}(\text{C}(=\text{O})\text{O})\text{O} + 4 \text{ H}_2\text{O}$                                                                                                                                          |
| 64_21_3  | 14    | 2     | -137.2 | 50.8  | $6 \text{ CO}_2 + 9 \text{ H}_2 + \text{OC}(=\text{O})\text{C}=\text{C}(\text{C}(=\text{O})\text{O})\text{O} \rightarrow$<br>$\rightarrow 2 \text{ CC}(=\text{O})\text{O} + \text{OC}(=\text{O})\text{C}(=\text{O})\text{C}(\text{C}(=\text{O})\text{O})\text{O} + 4 \text{ H}_2\text{O} + \text{O}=\text{CC}(=\text{O})\text{O}$ |
| 64_21_4  | 14    | 2     | -137.2 | 52.6  | $6 \text{ CO}_2 + 9 \text{ H}_2 + \text{OC}(=\text{O})\text{C}=\text{C}(\text{C}(=\text{O})\text{O})\text{O} \rightarrow$<br>$\rightarrow 2 \text{ CC}(=\text{O})\text{O} + \text{OC}(=\text{O})\text{C}(=\text{O})\text{C}(\text{C}(=\text{O})\text{O})\text{O} + 4 \text{ H}_2\text{O} + \text{O}=\text{CC}(=\text{O})\text{O}$ |
| 64_21_5  | 14    | 2     | -113.1 | 50.8  | $6 \text{ CO}_2 + 8 \text{ H}_2 \rightarrow \text{CC}(=\text{O})\text{O} + \text{OC}(=\text{O})\text{C}(=\text{O})\text{C}(\text{C}(=\text{O})\text{O})\text{O} + 4 \text{ H}_2\text{O}$                                                                                                                                          |
| 64_21_6  | 14    | 2     | -113.1 | 52.6  | $6 \text{ CO}_2 + 8 \text{ H}_2 \rightarrow \text{CC}(=\text{O})\text{O} + \text{OC}(=\text{O})\text{C}(=\text{O})\text{C}(\text{C}(=\text{O})\text{O})\text{O} + 4 \text{ H}_2\text{O}$                                                                                                                                          |
| 64_21_7  | 14    | 2     | -137.2 | 50.8  | $6 \text{ CO}_2 + 9 \text{ H}_2 + \text{OC}(=\text{O})\text{C}=\text{C}(\text{C}(=\text{O})\text{O})\text{O} \rightarrow$<br>$\rightarrow 2 \text{ CC}(=\text{O})\text{O} + \text{OC}(=\text{O})\text{C}(=\text{O})\text{C}(\text{C}(=\text{O})\text{O})\text{O} + 4 \text{ H}_2\text{O} + \text{O}=\text{CC}(=\text{O})\text{O}$ |

| Label    | $n_M$ | $n_B$ | $E_C$  | $E_H$ | Net reaction                                                                                                                                                                                      |
|----------|-------|-------|--------|-------|---------------------------------------------------------------------------------------------------------------------------------------------------------------------------------------------------|
| 64_21_8  | 14    | 2     | -137.2 | 52.6  | $6 \text{ CO}_2 + 9 \text{ H}_2 + \text{OC(=O)C=C(C(=O)O)O} \rightarrow$<br>$\rightarrow 2 \text{ CC(=O)O} + \text{OC(=O)C(=O)C(C(=O)O)O} + 4 \text{ H}_2\text{O} + \text{O=CC(=O)O}$             |
| 64_21_9  | 13    | 2     | -85.8  | 50.8  | $6 \text{ CO}_2 + 7 \text{ H}_2 \rightarrow \text{CC(=O)O} + \text{O=C(C(=O)C(=O)O)C(=O)O} + 4 \text{ H}_2\text{O}$                                                                               |
| 64_21_10 | 14    | 2     | -113.1 | 52.6  | $6 \text{ CO}_2 + 8 \text{ H}_2 \rightarrow \text{CC(=O)O} + \text{OC(=O)C(=O)C(C(=O)O)O} + 4 \text{ H}_2\text{O}$                                                                                |
| 64_21_11 | 13    | 2     | -109.8 | 50.8  | $6 \text{ CO}_2 + 8 \text{ H}_2 + \text{OC(=O)C=C(C(=O)O)O} \rightarrow$<br>$\rightarrow 2 \text{ CC(=O)O} + \text{O=C(C(=O)C(=O)O)C(=O)O} + 4 \text{ H}_2\text{O} + \text{O=CC(=O)O}$            |
| 64_21_12 | 14    | 2     | -137.2 | 52.6  | $6 \text{ CO}_2 + 9 \text{ H}_2 + \text{OC(=O)C=C(C(=O)O)O} \rightarrow$<br>$\rightarrow 2 \text{ CC(=O)O} + \text{OC(=O)C(=O)C(C(=O)O)O} + 4 \text{ H}_2\text{O} + \text{O=CC(=O)O}$             |
| 64_21_13 | 13    | 2     | -85.8  | 50.8  | $6 \text{ CO}_2 + 7 \text{ H}_2 \rightarrow \text{CC(=O)O} + \text{O=C(C(=O)C(=O)O)C(=O)O} + 4 \text{ H}_2\text{O}$                                                                               |
| 64_21_14 | 14    | 2     | -113.1 | 52.6  | $6 \text{ CO}_2 + 8 \text{ H}_2 \rightarrow \text{CC(=O)O} + \text{OC(=O)C(=O)C(C(=O)O)O} + 4 \text{ H}_2\text{O}$                                                                                |
| 64_21_15 | 13    | 2     | -109.8 | 50.8  | $6 \text{ CO}_2 + 8 \text{ H}_2 + \text{OC(=O)C=C(C(=O)O)O} \rightarrow$<br>$\rightarrow 2 \text{ CC(=O)O} + \text{O=C(C(=O)C(=O)O)C(=O)O} + 4 \text{ H}_2\text{O} + \text{O=CC(=O)O}$            |
| 64_21_16 | 14    | 2     | -137.2 | 52.6  | $6 \text{ CO}_2 + 9 \text{ H}_2 + \text{OC(=O)C=C(C(=O)O)O} \rightarrow$<br>$\rightarrow 2 \text{ CC(=O)O} + \text{OC(=O)C(=O)C(C(=O)O)O} + 4 \text{ H}_2\text{O} + \text{O=CC(=O)O}$             |
| 64_21_17 | 13    | 1     | -100.4 | 45.1  | $6 \text{ CO}_2 + 8 \text{ H}_2 \rightarrow \text{O=C(C(=O)C(=O)O)C(=O)O} + 5 \text{ H}_2\text{O} + \text{CC=O}$                                                                                  |
| 64_21_18 | 14    | 1     | -127.7 | 47.0  | $6 \text{ CO}_2 + 9 \text{ H}_2 \rightarrow \text{OC(=O)C(=O)C(C(=O)O)O} + 5 \text{ H}_2\text{O} + \text{CC=O}$                                                                                   |
| 64_21_19 | 14    | 2     | -124.4 | 45.1  | $6 \text{ CO}_2 + 9 \text{ H}_2 + \text{OC(=O)C=C(C(=O)O)O} \rightarrow$<br>$\rightarrow \text{CC(=O)O} + \text{O=CC(=O)O} + \text{O=C(C(=O)C(=O)O)C(=O)O} + 5 \text{ H}_2\text{O} + \text{CC=O}$ |



| Label    | $n_M$ | $n_B$ | $E_C$  | $E_H$ | Net reaction                                                                                                                                                                                      |
|----------|-------|-------|--------|-------|---------------------------------------------------------------------------------------------------------------------------------------------------------------------------------------------------|
| 64_21_20 | 15    | 2     | -151.8 | 47.0  | $6 \text{ CO}_2 + 10 \text{ H}_2 + \text{OC(=O)C=C(C(=O)O)O} \rightarrow$<br>$\rightarrow \text{CC(=O)O} + \text{O=CC(=O)O} + \text{OC(=O)C(=O)C(C(=O)O)O} + 5 \text{ H}_2\text{O} + \text{CC=O}$ |
| 64_21_21 | 13    | 1     | -100.4 | 45.1  | $6 \text{ CO}_2 + 8 \text{ H}_2 \rightarrow \text{O=C(C(=O)C(=O)O)C(=O)O} + 5 \text{ H}_2\text{O} + \text{CC=O}$                                                                                  |
| 64_21_22 | 14    | 1     | -127.7 | 47.0  | $6 \text{ CO}_2 + 9 \text{ H}_2 \rightarrow \text{OC(=O)C(=O)C(C(=O)O)O} + 5 \text{ H}_2\text{O} + \text{CC=O}$                                                                                   |
| 64_21_23 | 14    | 2     | -124.4 | 45.1  | $6 \text{ CO}_2 + 9 \text{ H}_2 + \text{OC(=O)C=C(C(=O)O)O} \rightarrow$<br>$\rightarrow \text{CC(=O)O} + \text{O=CC(=O)O} + \text{O=C(C(=O)C(=O)O)C(=O)O} + 5 \text{ H}_2\text{O} + \text{CC=O}$ |
| 64_21_24 | 15    | 2     | -151.8 | 47.0  | $6 \text{ CO}_2 + 10 \text{ H}_2 + \text{OC(=O)C=C(C(=O)O)O} \rightarrow$<br>$\rightarrow \text{CC(=O)O} + \text{O=CC(=O)O} + \text{OC(=O)C(=O)C(C(=O)O)O} + 5 \text{ H}_2\text{O} + \text{CC=O}$ |
| 64_21_25 | 13    | 2     | -85.8  | 45.1  | $6 \text{ CO}_2 + 7 \text{ H}_2 \rightarrow \text{CC(=O)O} + \text{O=C(C(=O)C(=O)O)C(=O)O} + 4 \text{ H}_2\text{O}$                                                                               |
| 64_21_26 | 14    | 2     | -113.1 | 47.0  | $6 \text{ CO}_2 + 8 \text{ H}_2 \rightarrow \text{CC(=O)O} + \text{OC(=O)C(=O)C(C(=O)O)O} + 4 \text{ H}_2\text{O}$                                                                                |
| 64_21_27 | 13    | 2     | -115.0 | 45.1  | $6 \text{ CO}_2 + 8 \text{ H}_2 + \text{OC(=O)C=C(C(=O)O)O} \rightarrow$<br>$\rightarrow \text{CC(=O)O} + \text{OC(=O)CC(C(=O)O)O} + \text{O=C(C(=O)C(=O)O)C(=O)O} + 4 \text{ H}_2\text{O}$       |
| 64_21_28 | 14    | 2     | -142.3 | 47.0  | $6 \text{ CO}_2 + 9 \text{ H}_2 + \text{OC(=O)C=C(C(=O)O)O} \rightarrow$<br>$\rightarrow \text{CC(=O)O} + \text{OC(=O)CC(C(=O)O)O} + \text{OC(=O)C(=O)C(C(=O)O)O} + 4 \text{ H}_2\text{O}$        |
| 64_21_29 | 13    | 2     | -85.8  | 45.1  | $6 \text{ CO}_2 + 7 \text{ H}_2 \rightarrow \text{CC(=O)O} + \text{O=C(C(=O)C(=O)O)C(=O)O} + 4 \text{ H}_2\text{O}$                                                                               |
| 64_21_30 | 14    | 2     | -113.1 | 47.0  | $6 \text{ CO}_2 + 8 \text{ H}_2 \rightarrow \text{CC(=O)O} + \text{OC(=O)C(=O)C(C(=O)O)O} + 4 \text{ H}_2\text{O}$                                                                                |
| 64_21_31 | 13    | 2     | -115.0 | 45.1  | $6 \text{ CO}_2 + 8 \text{ H}_2 + \text{OC(=O)C=C(C(=O)O)O} \rightarrow$<br>$\rightarrow \text{CC(=O)O} + \text{OC(=O)CC(C(=O)O)O} + \text{O=C(C(=O)C(=O)O)C(=O)O} + 4 \text{ H}_2\text{O}$       |

7

| Label      | $n_M$ | $n_B$ | $E_C$  | $E_H$ | Net reaction                                                                                                                                                                               |
|------------|-------|-------|--------|-------|--------------------------------------------------------------------------------------------------------------------------------------------------------------------------------------------|
| 64_21_32   | 14    | 2     | -142.3 | 47.0  | $6 \text{ CO}_2 + 9 \text{ H}_2 + \text{OC(=O)C=C(C(=O)O)O} \rightarrow$<br>$\rightarrow \text{CC(=O)O} + \text{OC(=O)CC(C(=O)O)O} + \text{OC(=O)C(=O)C(C(=O)O)O} + 4 \text{ H}_2\text{O}$ |
| 64_21_33   | 13    | 2     | -85.8  | 45.1  | $6 \text{ CO}_2 + 7 \text{ H}_2 \rightarrow \text{CC(=O)O} + \text{O=C(C(=O)C(=O)O)C(=O)O} + 4 \text{ H}_2\text{O}$                                                                        |
| 64_21_34   | 14    | 2     | -113.1 | 47.0  | $6 \text{ CO}_2 + 8 \text{ H}_2 \rightarrow \text{CC(=O)O} + \text{OC(=O)C(=O)C(C(=O)O)O} + 4 \text{ H}_2\text{O}$                                                                         |
| 64_21_35   | 14    | 3     | -109.8 | 45.1  | $6 \text{ CO}_2 + 8 \text{ H}_2 + \text{OC(=O)C=C(C(=O)O)O} \rightarrow$<br>$\rightarrow 2 \text{ CC(=O)O} + \text{O=CC(=O)O} + \text{O=C(C(=O)C(=O)O)C(=O)O} + 4 \text{ H}_2\text{O}$     |
| 64_21_36   | 15    | 3     | -137.2 | 47.0  | $6 \text{ CO}_2 + 9 \text{ H}_2 + \text{OC(=O)C=C(C(=O)O)O} \rightarrow$<br>$\rightarrow 2 \text{ CC(=O)O} + \text{O=CC(=O)O} + \text{OC(=O)C(=O)C(C(=O)O)O} + 4 \text{ H}_2\text{O}$      |
| ∞ 64_21_37 | 12    | 2     | -81.8  | 50.8  | $5 \text{ CO}_2 + 6 \text{ H}_2 \rightarrow \text{CC(=O)O} + \text{O=C(C(=O)O)C(=O)O} + 3 \text{ H}_2\text{O}$                                                                             |
| 64_21_38   | 13    | 2     | -113.1 | 52.6  | $6 \text{ CO}_2 + 8 \text{ H}_2 \rightarrow \text{CC(=O)O} + \text{OC(=O)C(=O)C(C(=O)O)O} + 4 \text{ H}_2\text{O}$                                                                         |
| 64_21_39   | 12    | 2     | -105.8 | 50.8  | $5 \text{ CO}_2 + 7 \text{ H}_2 + \text{OC(=O)C=C(C(=O)O)O} \rightarrow$<br>$\rightarrow 2 \text{ CC(=O)O} + \text{O=C(C(=O)O)C(=O)O} + 3 \text{ H}_2\text{O} + \text{O=CC(=O)O}$          |
| 64_21_40   | 13    | 2     | -137.2 | 52.6  | $6 \text{ CO}_2 + 9 \text{ H}_2 + \text{OC(=O)C=C(C(=O)O)O} \rightarrow$<br>$\rightarrow 2 \text{ CC(=O)O} + \text{OC(=O)C(=O)C(C(=O)O)O} + 4 \text{ H}_2\text{O} + \text{O=CC(=O)O}$      |
| 64_21_41   | 12    | 2     | -81.8  | 50.8  | $5 \text{ CO}_2 + 6 \text{ H}_2 \rightarrow \text{CC(=O)O} + \text{O=C(C(=O)O)C(=O)O} + 3 \text{ H}_2\text{O}$                                                                             |
| 64_21_42   | 13    | 2     | -113.1 | 52.6  | $6 \text{ CO}_2 + 8 \text{ H}_2 \rightarrow \text{CC(=O)O} + \text{OC(=O)C(=O)C(C(=O)O)O} + 4 \text{ H}_2\text{O}$                                                                         |
| 64_21_43   | 12    | 2     | -105.8 | 50.8  | $5 \text{ CO}_2 + 7 \text{ H}_2 + \text{OC(=O)C=C(C(=O)O)O} \rightarrow$<br>$\rightarrow 2 \text{ CC(=O)O} + \text{O=C(C(=O)O)C(=O)O} + 3 \text{ H}_2\text{O} + \text{O=CC(=O)O}$          |

| Label    | $n_M$ | $n_B$ | $E_C$  | $E_H$ | Net reaction                                                                                                                                                                                      |
|----------|-------|-------|--------|-------|---------------------------------------------------------------------------------------------------------------------------------------------------------------------------------------------------|
| 64.21.44 | 13    | 2     | -137.2 | 52.6  | $6 \text{ CO}_2 + 9 \text{ H}_2 + \text{OC(=O)C=C(C(=O)O)O} \rightarrow$<br>$\rightarrow 2 \text{ CC(=O)O} + \text{OC(=O)C(=O)C(C(=O)O)O} + 4 \text{ H}_2\text{O} + \text{O=CC(=O)O}$             |
| 64.21.45 | 12    | 1     | -96.4  | 43.9  | $5 \text{ CO}_2 + 7 \text{ H}_2 \rightarrow \text{O=C(C(=O)O)C(=O)O} + 4 \text{ H}_2\text{O} + \text{CC=O}$                                                                                       |
| 64.21.46 | 13    | 1     | -127.7 | 45.7  | $6 \text{ CO}_2 + 9 \text{ H}_2 \rightarrow \text{OC(=O)C(=O)C(C(=O)O)O} + 5 \text{ H}_2\text{O} + \text{CC=O}$                                                                                   |
| 64.21.47 | 13    | 2     | -120.4 | 43.9  | $5 \text{ CO}_2 + 8 \text{ H}_2 + \text{OC(=O)C=C(C(=O)O)O} \rightarrow$<br>$\rightarrow \text{CC(=O)O} + \text{O=CC(=O)O} + \text{O=C(C(=O)O)C(=O)O} + 4 \text{ H}_2\text{O} + \text{CC=O}$      |
| 64.21.48 | 14    | 2     | -151.8 | 45.7  | $6 \text{ CO}_2 + 10 \text{ H}_2 + \text{OC(=O)C=C(C(=O)O)O} \rightarrow$<br>$\rightarrow \text{CC(=O)O} + \text{O=CC(=O)O} + \text{OC(=O)C(=O)C(C(=O)O)O} + 5 \text{ H}_2\text{O} + \text{CC=O}$ |
| 64.21.49 | 12    | 1     | -96.4  | 43.9  | $5 \text{ CO}_2 + 7 \text{ H}_2 \rightarrow \text{O=C(C(=O)O)C(=O)O} + 4 \text{ H}_2\text{O} + \text{CC=O}$                                                                                       |
| 64.21.50 | 13    | 1     | -127.7 | 45.7  | $6 \text{ CO}_2 + 9 \text{ H}_2 \rightarrow \text{OC(=O)C(=O)C(C(=O)O)O} + 5 \text{ H}_2\text{O} + \text{CC=O}$                                                                                   |
| 64.21.51 | 13    | 2     | -120.4 | 43.9  | $5 \text{ CO}_2 + 8 \text{ H}_2 + \text{OC(=O)C=C(C(=O)O)O} \rightarrow$<br>$\rightarrow \text{CC(=O)O} + \text{O=CC(=O)O} + \text{O=C(C(=O)O)C(=O)O} + 4 \text{ H}_2\text{O} + \text{CC=O}$      |
| 64.21.52 | 14    | 2     | -151.8 | 45.7  | $6 \text{ CO}_2 + 10 \text{ H}_2 + \text{OC(=O)C=C(C(=O)O)O} \rightarrow$<br>$\rightarrow \text{CC(=O)O} + \text{O=CC(=O)O} + \text{OC(=O)C(=O)C(C(=O)O)O} + 5 \text{ H}_2\text{O} + \text{CC=O}$ |
| 64.21.53 | 12    | 2     | -81.8  | 43.9  | $5 \text{ CO}_2 + 6 \text{ H}_2 \rightarrow \text{CC(=O)O} + \text{O=C(C(=O)O)C(=O)O} + 3 \text{ H}_2\text{O}$                                                                                    |
| 64.21.54 | 13    | 2     | -113.1 | 45.7  | $6 \text{ CO}_2 + 8 \text{ H}_2 \rightarrow \text{CC(=O)O} + \text{OC(=O)C(=O)C(C(=O)O)O} + 4 \text{ H}_2\text{O}$                                                                                |
| 64.21.55 | 12    | 2     | -110.9 | 43.9  | $5 \text{ CO}_2 + 7 \text{ H}_2 + \text{OC(=O)C=C(C(=O)O)O} \rightarrow$<br>$\rightarrow \text{CC(=O)O} + \text{OC(=O)CC(C(=O)O)O} + \text{O=C(C(=O)O)C(=O)O} + 3 \text{ H}_2\text{O}$            |

| Label    | $n_M$ | $n_B$ | $E_C$  | $E_H$ | Net reaction                                                                                                                                                                                      |
|----------|-------|-------|--------|-------|---------------------------------------------------------------------------------------------------------------------------------------------------------------------------------------------------|
| 64_21_56 | 13    | 2     | -142.3 | 45.7  | $6 \text{ CO}_2 + 9 \text{ H}_2 + \text{OC(=O)C=C(C(=O)O)O} \rightarrow$<br>$\rightarrow \text{CC(=O)O} + \text{OC(=O)CC(C(=O)O)O} + \text{OC(=O)C(=O)C(C(=O)O)O} + 4 \text{ H}_2\text{O}$        |
| 64_21_57 | 12    | 2     | -81.8  | 43.9  | $5 \text{ CO}_2 + 6 \text{ H}_2 \rightarrow \text{CC(=O)O} + \text{O=C(C(=O)O)C(=O)O} + 3 \text{ H}_2\text{O}$                                                                                    |
| 64_21_58 | 13    | 2     | -113.1 | 45.7  | $6 \text{ CO}_2 + 8 \text{ H}_2 \rightarrow \text{CC(=O)O} + \text{OC(=O)C(=O)C(C(=O)O)O} + 4 \text{ H}_2\text{O}$                                                                                |
| 64_21_59 | 12    | 2     | -110.9 | 43.9  | $5 \text{ CO}_2 + 7 \text{ H}_2 + \text{OC(=O)C=C(C(=O)O)O} \rightarrow$<br>$\rightarrow \text{CC(=O)O} + \text{OC(=O)CC(C(=O)O)O} + \text{O=C(C(=O)O)C(=O)O} + 3 \text{ H}_2\text{O}$            |
| 64_21_60 | 13    | 2     | -142.3 | 45.7  | $6 \text{ CO}_2 + 9 \text{ H}_2 + \text{OC(=O)C=C(C(=O)O)O} \rightarrow$<br>$\rightarrow \text{CC(=O)O} + \text{OC(=O)CC(C(=O)O)O} + \text{OC(=O)C(=O)C(C(=O)O)O} + 4 \text{ H}_2\text{O}$        |
| 64_21_61 | 12    | 2     | -81.8  | 43.9  | $5 \text{ CO}_2 + 6 \text{ H}_2 \rightarrow \text{CC(=O)O} + \text{O=C(C(=O)O)C(=O)O} + 3 \text{ H}_2\text{O}$                                                                                    |
| 64_21_62 | 13    | 2     | -113.1 | 45.7  | $6 \text{ CO}_2 + 8 \text{ H}_2 \rightarrow \text{CC(=O)O} + \text{OC(=O)C(=O)C(C(=O)O)O} + 4 \text{ H}_2\text{O}$                                                                                |
| 64_21_63 | 13    | 3     | -105.8 | 43.9  | $5 \text{ CO}_2 + 7 \text{ H}_2 + \text{OC(=O)C=C(C(=O)O)O} \rightarrow$<br>$\rightarrow 2 \text{ CC(=O)O} + \text{O=CC(=O)O} + \text{O=C(C(=O)O)C(=O)O} + 3 \text{ H}_2\text{O}$                 |
| 64_21_64 | 14    | 3     | -137.2 | 45.7  | $6 \text{ CO}_2 + 9 \text{ H}_2 + \text{OC(=O)C=C(C(=O)O)O} \rightarrow$<br>$\rightarrow 2 \text{ CC(=O)O} + \text{O=CC(=O)O} + \text{OC(=O)C(=O)C(C(=O)O)O} + 4 \text{ H}_2\text{O}$             |
| 64_21_65 | 14    | 1     | -127.7 | 45.4  | $6 \text{ CO}_2 + 9 \text{ H}_2 \rightarrow \text{OC(=O)C(=O)C(C(=O)O)O} + 5 \text{ H}_2\text{O} + \text{CC=O}$                                                                                   |
| 64_21_66 | 14    | 1     | -127.7 | 47.2  | $6 \text{ CO}_2 + 9 \text{ H}_2 \rightarrow \text{OC(=O)C(=O)C(C(=O)O)O} + 5 \text{ H}_2\text{O} + \text{CC=O}$                                                                                   |
| 64_21_67 | 15    | 2     | -151.8 | 45.4  | $6 \text{ CO}_2 + 10 \text{ H}_2 + \text{OC(=O)C=C(C(=O)O)O} \rightarrow$<br>$\rightarrow \text{CC(=O)O} + \text{O=CC(=O)O} + \text{OC(=O)C(=O)C(C(=O)O)O} + 5 \text{ H}_2\text{O} + \text{CC=O}$ |

| Label    | $n_M$ | $n_B$ | $E_C$  | $E_H$ | Net reaction                                                                                                                                                                                      |
|----------|-------|-------|--------|-------|---------------------------------------------------------------------------------------------------------------------------------------------------------------------------------------------------|
| 64.21.68 | 15    | 2     | -151.8 | 47.2  | $6 \text{ CO}_2 + 10 \text{ H}_2 + \text{OC(=O)C=C(C(=O)O)O} \rightarrow$<br>$\rightarrow \text{CC(=O)O} + \text{O=CC(=O)O} + \text{OC(=O)C(=O)C(C(=O)O)O} + 5 \text{ H}_2\text{O} + \text{CC=O}$ |
| 64.21.69 | 14    | 1     | -127.7 | 45.4  | $6 \text{ CO}_2 + 9 \text{ H}_2 \rightarrow \text{OC(=O)C(=O)C(C(=O)O)O} + 5 \text{ H}_2\text{O} + \text{CC=O}$                                                                                   |
| 64.21.70 | 14    | 1     | -127.7 | 47.2  | $6 \text{ CO}_2 + 9 \text{ H}_2 \rightarrow \text{OC(=O)C(=O)C(C(=O)O)O} + 5 \text{ H}_2\text{O} + \text{CC=O}$                                                                                   |
| 64.21.71 | 15    | 2     | -151.8 | 45.4  | $6 \text{ CO}_2 + 10 \text{ H}_2 + \text{OC(=O)C=C(C(=O)O)O} \rightarrow$<br>$\rightarrow \text{CC(=O)O} + \text{O=CC(=O)O} + \text{OC(=O)C(=O)C(C(=O)O)O} + 5 \text{ H}_2\text{O} + \text{CC=O}$ |
| 64.21.72 | 15    | 2     | -151.8 | 47.2  | $6 \text{ CO}_2 + 10 \text{ H}_2 + \text{OC(=O)C=C(C(=O)O)O} \rightarrow$<br>$\rightarrow \text{CC(=O)O} + \text{O=CC(=O)O} + \text{OC(=O)C(=O)C(C(=O)O)O} + 5 \text{ H}_2\text{O} + \text{CC=O}$ |
| 64.21.73 | 14    | 2     | -113.1 | 45.4  | $6 \text{ CO}_2 + 8 \text{ H}_2 \rightarrow \text{CC(=O)O} + \text{OC(=O)C(=O)C(C(=O)O)O} + 4 \text{ H}_2\text{O}$                                                                                |
| 64.21.74 | 14    | 2     | -113.1 | 47.2  | $6 \text{ CO}_2 + 8 \text{ H}_2 \rightarrow \text{CC(=O)O} + \text{OC(=O)C(=O)C(C(=O)O)O} + 4 \text{ H}_2\text{O}$                                                                                |
| 64.21.75 | 14    | 2     | -142.3 | 45.4  | $6 \text{ CO}_2 + 9 \text{ H}_2 + \text{OC(=O)C=C(C(=O)O)O} \rightarrow$<br>$\rightarrow \text{CC(=O)O} + \text{OC(=O)CC(C(=O)O)O} + \text{OC(=O)C(=O)C(C(=O)O)O} + 4 \text{ H}_2\text{O}$        |
| 64.21.76 | 14    | 2     | -142.3 | 47.2  | $6 \text{ CO}_2 + 9 \text{ H}_2 + \text{OC(=O)C=C(C(=O)O)O} \rightarrow$<br>$\rightarrow \text{CC(=O)O} + \text{OC(=O)CC(C(=O)O)O} + \text{OC(=O)C(=O)C(C(=O)O)O} + 4 \text{ H}_2\text{O}$        |
| 64.21.77 | 14    | 2     | -113.1 | 45.4  | $6 \text{ CO}_2 + 8 \text{ H}_2 \rightarrow \text{CC(=O)O} + \text{OC(=O)C(=O)C(C(=O)O)O} + 4 \text{ H}_2\text{O}$                                                                                |
| 64.21.78 | 14    | 2     | -113.1 | 47.2  | $6 \text{ CO}_2 + 8 \text{ H}_2 \rightarrow \text{CC(=O)O} + \text{OC(=O)C(=O)C(C(=O)O)O} + 4 \text{ H}_2\text{O}$                                                                                |
| 64.21.79 | 14    | 2     | -142.3 | 45.4  | $6 \text{ CO}_2 + 9 \text{ H}_2 + \text{OC(=O)C=C(C(=O)O)O} \rightarrow$<br>$\rightarrow \text{CC(=O)O} + \text{OC(=O)CC(C(=O)O)O} + \text{OC(=O)C(=O)C(C(=O)O)O} + 4 \text{ H}_2\text{O}$        |

| Label    | $n_M$ | $n_B$ | $E_C$  | $E_H$ | Net reaction                                                                                                                                                                                      |
|----------|-------|-------|--------|-------|---------------------------------------------------------------------------------------------------------------------------------------------------------------------------------------------------|
| 64_21_80 | 14    | 2     | -142.3 | 47.2  | $6 \text{ CO}_2 + 9 \text{ H}_2 + \text{OC(=O)C=C(C(=O)O)O} \rightarrow$<br>$\rightarrow \text{CC(=O)O} + \text{OC(=O)CC(C(=O)O)O} + \text{OC(=O)C(=O)C(C(=O)O)O} + 4 \text{ H}_2\text{O}$        |
| 64_21_81 | 14    | 2     | -113.1 | 45.4  | $6 \text{ CO}_2 + 8 \text{ H}_2 \rightarrow \text{CC(=O)O} + \text{OC(=O)C(=O)C(C(=O)O)O} + 4 \text{ H}_2\text{O}$                                                                                |
| 64_21_82 | 14    | 2     | -113.1 | 47.2  | $6 \text{ CO}_2 + 8 \text{ H}_2 \rightarrow \text{CC(=O)O} + \text{OC(=O)C(=O)C(C(=O)O)O} + 4 \text{ H}_2\text{O}$                                                                                |
| 64_21_83 | 15    | 3     | -137.2 | 45.4  | $6 \text{ CO}_2 + 9 \text{ H}_2 + \text{OC(=O)C=C(C(=O)O)O} \rightarrow$<br>$\rightarrow 2 \text{ CC(=O)O} + \text{O=CC(=O)O} + \text{OC(=O)C(=O)C(C(=O)O)O} + 4 \text{ H}_2\text{O}$             |
| 64_21_84 | 15    | 3     | -137.2 | 47.2  | $6 \text{ CO}_2 + 9 \text{ H}_2 + \text{OC(=O)C=C(C(=O)O)O} \rightarrow$<br>$\rightarrow 2 \text{ CC(=O)O} + \text{O=CC(=O)O} + \text{OC(=O)C(=O)C(C(=O)O)O} + 4 \text{ H}_2\text{O}$             |
| 64_21_85 | 14    | 1     | -127.7 | 45.4  | $6 \text{ CO}_2 + 9 \text{ H}_2 \rightarrow \text{OC(=O)C(=O)C(C(=O)O)O} + 5 \text{ H}_2\text{O} + \text{CC=O}$                                                                                   |
| 64_21_86 | 14    | 1     | -127.7 | 47.2  | $6 \text{ CO}_2 + 9 \text{ H}_2 \rightarrow \text{OC(=O)C(=O)C(C(=O)O)O} + 5 \text{ H}_2\text{O} + \text{CC=O}$                                                                                   |
| 64_21_87 | 15    | 1     | -151.8 | 45.4  | $6 \text{ CO}_2 + 10 \text{ H}_2 + \text{OC(=O)C=C(C(=O)O)O} \rightarrow$<br>$\rightarrow \text{CC(=O)O} + \text{OC(=O)C(=O)C(C(=O)O)O} + 5 \text{ H}_2\text{O} + \text{O=CC(=O)O} + \text{CC=O}$ |
| 64_21_88 | 15    | 1     | -151.8 | 47.2  | $6 \text{ CO}_2 + 10 \text{ H}_2 + \text{OC(=O)C=C(C(=O)O)O} \rightarrow$<br>$\rightarrow \text{CC(=O)O} + \text{OC(=O)C(=O)C(C(=O)O)O} + 5 \text{ H}_2\text{O} + \text{O=CC(=O)O} + \text{CC=O}$ |
| 64_21_89 | 14    | 1     | -127.7 | 45.4  | $6 \text{ CO}_2 + 9 \text{ H}_2 \rightarrow \text{OC(=O)C(=O)C(C(=O)O)O} + 5 \text{ H}_2\text{O} + \text{CC=O}$                                                                                   |
| 64_21_90 | 14    | 1     | -127.7 | 47.2  | $6 \text{ CO}_2 + 9 \text{ H}_2 \rightarrow \text{OC(=O)C(=O)C(C(=O)O)O} + 5 \text{ H}_2\text{O} + \text{CC=O}$                                                                                   |
| 64_21_91 | 15    | 1     | -151.8 | 45.4  | $6 \text{ CO}_2 + 10 \text{ H}_2 + \text{OC(=O)C=C(C(=O)O)O} \rightarrow$<br>$\rightarrow \text{CC(=O)O} + \text{OC(=O)C(=O)C(C(=O)O)O} + 5 \text{ H}_2\text{O} + \text{O=CC(=O)O} + \text{CC=O}$ |

| Label     | $n_M$ | $n_B$ | $E_C$  | $E_H$ | Net reaction                                                                                                                                                                                      |
|-----------|-------|-------|--------|-------|---------------------------------------------------------------------------------------------------------------------------------------------------------------------------------------------------|
| 64.21.92  | 15    | 1     | -151.8 | 47.2  | $6 \text{ CO}_2 + 10 \text{ H}_2 + \text{OC(=O)C=C(C(=O)O)O} \rightarrow$<br>$\rightarrow \text{CC(=O)O} + \text{OC(=O)C(=O)C(C(=O)O)O} + 5 \text{ H}_2\text{O} + \text{O=CC(=O)O} + \text{CC=O}$ |
| 64.21.93  | 14    | 1     | -127.7 | 45.4  | $6 \text{ CO}_2 + 9 \text{ H}_2 \rightarrow \text{OC(=O)C(=O)C(C(=O)O)O} + 5 \text{ H}_2\text{O} + \text{CC=O}$                                                                                   |
| 64.21.94  | 14    | 1     | -127.7 | 47.2  | $6 \text{ CO}_2 + 9 \text{ H}_2 \rightarrow \text{OC(=O)C(=O)C(C(=O)O)O} + 5 \text{ H}_2\text{O} + \text{CC=O}$                                                                                   |
| 64.21.95  | 15    | 1     | -151.8 | 45.4  | $6 \text{ CO}_2 + 10 \text{ H}_2 + \text{OC(=O)C=C(C(=O)O)O} \rightarrow$<br>$\rightarrow \text{CC(=O)O} + \text{OC(=O)C(=O)C(C(=O)O)O} + 5 \text{ H}_2\text{O} + \text{O=CC(=O)O} + \text{CC=O}$ |
| 64.21.96  | 15    | 1     | -151.8 | 47.2  | $6 \text{ CO}_2 + 10 \text{ H}_2 + \text{OC(=O)C=C(C(=O)O)O} \rightarrow$<br>$\rightarrow \text{CC(=O)O} + \text{OC(=O)C(=O)C(C(=O)O)O} + 5 \text{ H}_2\text{O} + \text{O=CC(=O)O} + \text{CC=O}$ |
| 64.21.97  | 14    | 1     | -127.7 | 45.4  | $6 \text{ CO}_2 + 9 \text{ H}_2 \rightarrow \text{OC(=O)C(=O)C(C(=O)O)O} + 5 \text{ H}_2\text{O} + \text{CC=O}$                                                                                   |
| 64.21.98  | 14    | 1     | -127.7 | 47.2  | $6 \text{ CO}_2 + 9 \text{ H}_2 \rightarrow \text{OC(=O)C(=O)C(C(=O)O)O} + 5 \text{ H}_2\text{O} + \text{CC=O}$                                                                                   |
| 64.21.99  | 15    | 2     | -151.8 | 45.4  | $6 \text{ CO}_2 + 10 \text{ H}_2 + \text{OC(=O)C=C(C(=O)O)O} \rightarrow$<br>$\rightarrow \text{CC(=O)O} + \text{O=CC(=O)O} + \text{OC(=O)C(=O)C(C(=O)O)O} + 5 \text{ H}_2\text{O} + \text{CC=O}$ |
| 64.21.100 | 15    | 2     | -151.8 | 47.2  | $6 \text{ CO}_2 + 10 \text{ H}_2 + \text{OC(=O)C=C(C(=O)O)O} \rightarrow$<br>$\rightarrow \text{CC(=O)O} + \text{O=CC(=O)O} + \text{OC(=O)C(=O)C(C(=O)O)O} + 5 \text{ H}_2\text{O} + \text{CC=O}$ |
| 64.21.101 | 14    | 1     | -127.7 | 45.4  | $6 \text{ CO}_2 + 9 \text{ H}_2 \rightarrow \text{OC(=O)C(=O)C(C(=O)O)O} + 5 \text{ H}_2\text{O} + \text{CC=O}$                                                                                   |
| 64.21.102 | 14    | 1     | -127.7 | 47.2  | $6 \text{ CO}_2 + 9 \text{ H}_2 \rightarrow \text{OC(=O)C(=O)C(C(=O)O)O} + 5 \text{ H}_2\text{O} + \text{CC=O}$                                                                                   |
| 64.21.103 | 15    | 2     | -151.8 | 45.4  | $6 \text{ CO}_2 + 10 \text{ H}_2 + \text{OC(=O)C=C(C(=O)O)O} \rightarrow$<br>$\rightarrow \text{CC(=O)O} + \text{O=CC(=O)O} + \text{OC(=O)C(=O)C(C(=O)O)O} + 5 \text{ H}_2\text{O} + \text{CC=O}$ |





| Label     | $n_M$ | $n_B$ | $E_C$  | $E_H$ | Net reaction                                                                                                                                                                                    |
|-----------|-------|-------|--------|-------|-------------------------------------------------------------------------------------------------------------------------------------------------------------------------------------------------|
| 64.21.116 | 15    | 3     | -137.2 | 47.2  | $6 \text{ CO}_2 + 9 \text{ H}_2 + \text{OC(=O)C=C(C(=O)O)O} \rightarrow$<br>$\rightarrow 2 \text{ CC(=O)O} + \text{O=CC(=O)O} + \text{OC(=O)C(=O)C(C(=O)O)O} + 4 \text{ H}_2\text{O}$           |
| 64.21.117 | 14    | 1     | -54.1  | 45.4  | $5 \text{ CO}_2 + 6 \text{ H}_2 \rightarrow 3 \text{ H}_2\text{O} + \text{OC(=O)C(=O)C(C(=O)O)O} + \text{C=O}$                                                                                  |
| 64.21.118 | 14    | 1     | -54.1  | 47.2  | $5 \text{ CO}_2 + 6 \text{ H}_2 \rightarrow 3 \text{ H}_2\text{O} + \text{OC(=O)C(=O)C(C(=O)O)O} + \text{C=O}$                                                                                  |
| 64.21.119 | 15    | 1     | -78.1  | 45.4  | $5 \text{ CO}_2 + 7 \text{ H}_2 + \text{OC(=O)C=C(C(=O)O)O} \rightarrow$<br>$\rightarrow \text{CC(=O)O} + 3 \text{ H}_2\text{O} + \text{OC(=O)C(=O)C(C(=O)O)O} + \text{O=CC(=O)O} + \text{C=O}$ |
| 64.21.120 | 15    | 1     | -78.1  | 47.2  | $5 \text{ CO}_2 + 7 \text{ H}_2 + \text{OC(=O)C=C(C(=O)O)O} \rightarrow$<br>$\rightarrow \text{CC(=O)O} + 3 \text{ H}_2\text{O} + \text{OC(=O)C(=O)C(C(=O)O)O} + \text{O=CC(=O)O} + \text{C=O}$ |
| 64.21.122 | 12    | 2     | -81.8  | 52.6  | $5 \text{ CO}_2 + 6 \text{ H}_2 \rightarrow \text{CC(=O)O} + \text{O=C(C(=O)O)C(=O)O} + 3 \text{ H}_2\text{O}$                                                                                  |
| 64.21.124 | 12    | 2     | -105.8 | 52.6  | $5 \text{ CO}_2 + 7 \text{ H}_2 + \text{OC(=O)C=C(C(=O)O)O} \rightarrow$<br>$\rightarrow 2 \text{ CC(=O)O} + \text{O=C(C(=O)O)C(=O)O} + 3 \text{ H}_2\text{O} + \text{O=CC(=O)O}$               |
| 64.21.126 | 12    | 2     | -81.8  | 52.6  | $5 \text{ CO}_2 + 6 \text{ H}_2 \rightarrow \text{CC(=O)O} + \text{O=C(C(=O)O)C(=O)O} + 3 \text{ H}_2\text{O}$                                                                                  |
| 64.21.128 | 12    | 2     | -105.8 | 52.6  | $5 \text{ CO}_2 + 7 \text{ H}_2 + \text{OC(=O)C=C(C(=O)O)O} \rightarrow$<br>$\rightarrow 2 \text{ CC(=O)O} + \text{O=C(C(=O)O)C(=O)O} + 3 \text{ H}_2\text{O} + \text{O=CC(=O)O}$               |
| 64.21.130 | 12    | 1     | -96.4  | 45.7  | $5 \text{ CO}_2 + 7 \text{ H}_2 \rightarrow \text{O=C(C(=O)O)C(=O)O} + 4 \text{ H}_2\text{O} + \text{CC=O}$                                                                                     |
| 64.21.132 | 13    | 2     | -120.4 | 45.7  | $5 \text{ CO}_2 + 8 \text{ H}_2 + \text{OC(=O)C=C(C(=O)O)O} \rightarrow$<br>$\rightarrow \text{CC(=O)O} + \text{O=CC(=O)O} + \text{O=C(C(=O)O)C(=O)O} + 4 \text{ H}_2\text{O} + \text{CC=O}$    |
| 64.21.134 | 12    | 1     | -96.4  | 45.7  | $5 \text{ CO}_2 + 7 \text{ H}_2 \rightarrow \text{O=C(C(=O)O)C(=O)O} + 4 \text{ H}_2\text{O} + \text{CC=O}$                                                                                     |

| Label     | $n_M$ | $n_B$ | $E_C$  | $E_H$ | Net reaction                                                                                                                                                                                      |
|-----------|-------|-------|--------|-------|---------------------------------------------------------------------------------------------------------------------------------------------------------------------------------------------------|
| 64.21.136 | 13    | 2     | -120.4 | 45.7  | $5 \text{ CO}_2 + 8 \text{ H}_2 + \text{OC(=O)C=C(C(=O)O)O} \rightarrow$<br>$\rightarrow \text{CC(=O)O} + \text{O=CC(=O)O} + \text{O=C(C(=O)O)C(=O)O} + 4 \text{ H}_2\text{O} + \text{CC=O}$      |
| 64.21.138 | 12    | 2     | -81.8  | 45.7  | $5 \text{ CO}_2 + 6 \text{ H}_2 \rightarrow \text{CC(=O)O} + \text{O=C(C(=O)O)C(=O)O} + 3 \text{ H}_2\text{O}$                                                                                    |
| 64.21.140 | 12    | 2     | -110.9 | 45.7  | $5 \text{ CO}_2 + 7 \text{ H}_2 + \text{OC(=O)C=C(C(=O)O)O} \rightarrow$<br>$\rightarrow \text{CC(=O)O} + \text{OC(=O)CC(C(=O)O)O} + \text{O=C(C(=O)O)C(=O)O} + 3 \text{ H}_2\text{O}$            |
| 64.21.142 | 12    | 2     | -81.8  | 45.7  | $5 \text{ CO}_2 + 6 \text{ H}_2 \rightarrow \text{CC(=O)O} + \text{O=C(C(=O)O)C(=O)O} + 3 \text{ H}_2\text{O}$                                                                                    |
| 64.21.144 | 12    | 2     | -110.9 | 45.7  | $5 \text{ CO}_2 + 7 \text{ H}_2 + \text{OC(=O)C=C(C(=O)O)O} \rightarrow$<br>$\rightarrow \text{CC(=O)O} + \text{OC(=O)CC(C(=O)O)O} + \text{O=C(C(=O)O)C(=O)O} + 3 \text{ H}_2\text{O}$            |
| 64.21.146 | 12    | 2     | -81.8  | 45.7  | $5 \text{ CO}_2 + 6 \text{ H}_2 \rightarrow \text{CC(=O)O} + \text{O=C(C(=O)O)C(=O)O} + 3 \text{ H}_2\text{O}$                                                                                    |
| 64.21.148 | 13    | 3     | -105.8 | 45.7  | $5 \text{ CO}_2 + 7 \text{ H}_2 + \text{OC(=O)C=C(C(=O)O)O} \rightarrow$<br>$\rightarrow 2 \text{ CC(=O)O} + \text{O=CC(=O)O} + \text{O=C(C(=O)O)C(=O)O} + 3 \text{ H}_2\text{O}$                 |
| 64.21.149 | 14    | 1     | -127.7 | 39.5  | $6 \text{ CO}_2 + 9 \text{ H}_2 \rightarrow \text{OC(=O)C(=O)C(C(=O)O)O} + 5 \text{ H}_2\text{O} + \text{CC=O}$                                                                                   |
| 64.21.150 | 13    | 1     | -127.6 | 41.4  | $5 \text{ CO}_2 + 8 \text{ H}_2 \rightarrow \text{OC(C(=O)O)C(=O)O} + 4 \text{ H}_2\text{O} + \text{CC=O}$                                                                                        |
| 64.21.151 | 15    | 1     | -151.8 | 39.5  | $6 \text{ CO}_2 + 10 \text{ H}_2 + \text{OC(=O)C=C(C(=O)O)O} \rightarrow$<br>$\rightarrow \text{CC(=O)O} + \text{OC(=O)C(=O)C(C(=O)O)O} + 5 \text{ H}_2\text{O} + \text{O=CC(=O)O} + \text{CC=O}$ |
| 64.21.152 | 14    | 1     | -151.7 | 41.4  | $5 \text{ CO}_2 + 9 \text{ H}_2 + \text{OC(=O)C=C(C(=O)O)O} \rightarrow$<br>$\rightarrow \text{CC(=O)O} + \text{OC(C(=O)O)C(=O)O} + 4 \text{ H}_2\text{O} + \text{O=CC(=O)O} + \text{CC=O}$       |
| 64.21.153 | 14    | 1     | -127.7 | 39.5  | $6 \text{ CO}_2 + 9 \text{ H}_2 \rightarrow \text{OC(=O)C(=O)C(C(=O)O)O} + 5 \text{ H}_2\text{O} + \text{CC=O}$                                                                                   |

| Label     | $n_M$ | $n_B$ | $E_C$  | $E_H$ | Net reaction                                                                                                                                                                                                                                                                                                                                         |
|-----------|-------|-------|--------|-------|------------------------------------------------------------------------------------------------------------------------------------------------------------------------------------------------------------------------------------------------------------------------------------------------------------------------------------------------------|
| 64.21.154 | 13    | 1     | -127.6 | 41.4  | $5 \text{ CO}_2 + 8 \text{ H}_2 \rightarrow \text{OC}(\text{C}(\text{=O})\text{O})\text{C}(\text{=O})\text{O} + 4 \text{ H}_2\text{O} + \text{CC}=\text{O}$                                                                                                                                                                                          |
| 64.21.155 | 15    | 1     | -151.8 | 39.5  | $6 \text{ CO}_2 + 10 \text{ H}_2 + \text{OC}(\text{=O})\text{C}=\text{C}(\text{C}(\text{=O})\text{O})\text{O} \rightarrow$<br>$\rightarrow \text{CC}(\text{=O})\text{O} + \text{OC}(\text{=O})\text{C}(\text{=O})\text{C}(\text{C}(\text{=O})\text{O})\text{O} + 5 \text{ H}_2\text{O} + \text{O}=\text{CC}(\text{=O})\text{O} + \text{CC}=\text{O}$ |
| 64.21.156 | 14    | 1     | -151.7 | 41.4  | $5 \text{ CO}_2 + 9 \text{ H}_2 + \text{OC}(\text{=O})\text{C}=\text{C}(\text{C}(\text{=O})\text{O})\text{O} \rightarrow$<br>$\rightarrow \text{CC}(\text{=O})\text{O} + \text{OC}(\text{C}(\text{=O})\text{O})\text{C}(\text{=O})\text{O} + 4 \text{ H}_2\text{O} + \text{O}=\text{CC}(\text{=O})\text{O} + \text{CC}=\text{O}$                     |
| 64.21.157 | 14    | 1     | -127.7 | 39.5  | $6 \text{ CO}_2 + 9 \text{ H}_2 \rightarrow \text{OC}(\text{=O})\text{C}(\text{=O})\text{C}(\text{C}(\text{=O})\text{O})\text{O} + 5 \text{ H}_2\text{O} + \text{CC}=\text{O}$                                                                                                                                                                       |
| 64.21.158 | 13    | 1     | -127.6 | 41.4  | $5 \text{ CO}_2 + 8 \text{ H}_2 \rightarrow \text{OC}(\text{C}(\text{=O})\text{O})\text{C}(\text{=O})\text{O} + 4 \text{ H}_2\text{O} + \text{CC}=\text{O}$                                                                                                                                                                                          |
| 64.21.159 | 15    | 1     | -151.8 | 39.5  | $6 \text{ CO}_2 + 10 \text{ H}_2 + \text{OC}(\text{=O})\text{C}=\text{C}(\text{C}(\text{=O})\text{O})\text{O} \rightarrow$<br>$\rightarrow \text{CC}(\text{=O})\text{O} + \text{OC}(\text{=O})\text{C}(\text{=O})\text{C}(\text{C}(\text{=O})\text{O})\text{O} + 5 \text{ H}_2\text{O} + \text{O}=\text{CC}(\text{=O})\text{O} + \text{CC}=\text{O}$ |
| 64.21.160 | 14    | 1     | -151.7 | 41.4  | $5 \text{ CO}_2 + 9 \text{ H}_2 + \text{OC}(\text{=O})\text{C}=\text{C}(\text{C}(\text{=O})\text{O})\text{O} \rightarrow$<br>$\rightarrow \text{CC}(\text{=O})\text{O} + \text{OC}(\text{C}(\text{=O})\text{O})\text{C}(\text{=O})\text{O} + 4 \text{ H}_2\text{O} + \text{O}=\text{CC}(\text{=O})\text{O} + \text{CC}=\text{O}$                     |
| 64.21.161 | 14    | 1     | -127.7 | 39.5  | $6 \text{ CO}_2 + 9 \text{ H}_2 \rightarrow \text{OC}(\text{=O})\text{C}(\text{=O})\text{C}(\text{C}(\text{=O})\text{O})\text{O} + 5 \text{ H}_2\text{O} + \text{CC}=\text{O}$                                                                                                                                                                       |
| 64.21.162 | 13    | 1     | -127.6 | 41.4  | $5 \text{ CO}_2 + 8 \text{ H}_2 \rightarrow \text{OC}(\text{C}(\text{=O})\text{O})\text{C}(\text{=O})\text{O} + 4 \text{ H}_2\text{O} + \text{CC}=\text{O}$                                                                                                                                                                                          |
| 64.21.163 | 15    | 2     | -151.8 | 39.5  | $6 \text{ CO}_2 + 10 \text{ H}_2 + \text{OC}(\text{=O})\text{C}=\text{C}(\text{C}(\text{=O})\text{O})\text{O} \rightarrow$<br>$\rightarrow \text{CC}(\text{=O})\text{O} + \text{O}=\text{CC}(\text{=O})\text{O} + \text{OC}(\text{=O})\text{C}(\text{=O})\text{C}(\text{C}(\text{=O})\text{O})\text{O} + 5 \text{ H}_2\text{O} + \text{CC}=\text{O}$ |
| 64.21.164 | 14    | 2     | -151.7 | 41.4  | $5 \text{ CO}_2 + 9 \text{ H}_2 + \text{OC}(\text{=O})\text{C}=\text{C}(\text{C}(\text{=O})\text{O})\text{O} \rightarrow$<br>$\rightarrow \text{CC}(\text{=O})\text{O} + \text{O}=\text{CC}(\text{=O})\text{O} + \text{OC}(\text{C}(\text{=O})\text{O})\text{C}(\text{=O})\text{O} + 4 \text{ H}_2\text{O} + \text{CC}=\text{O}$                     |
| 64.21.165 | 14    | 1     | -127.7 | 39.5  | $6 \text{ CO}_2 + 9 \text{ H}_2 \rightarrow \text{OC}(\text{=O})\text{C}(\text{=O})\text{C}(\text{C}(\text{=O})\text{O})\text{O} + 5 \text{ H}_2\text{O} + \text{CC}=\text{O}$                                                                                                                                                                       |

| Label     | $n_M$ | $n_B$ | $E_C$  | $E_H$ | Net reaction                                                                                                                                                                                                                                                                                                                                                |
|-----------|-------|-------|--------|-------|-------------------------------------------------------------------------------------------------------------------------------------------------------------------------------------------------------------------------------------------------------------------------------------------------------------------------------------------------------------|
| 64.21.166 | 13    | 1     | -127.6 | 41.4  | $5 \text{ CO}_2 + 8 \text{ H}_2 \rightarrow \text{OC}(\text{C}(\text{=O})\text{O})\text{C}(\text{=O})\text{O} + 4 \text{ H}_2\text{O} + \text{CC}=\text{O}$                                                                                                                                                                                                 |
| 64.21.167 | 15    | 2     | -151.8 | 39.5  | $6 \text{ CO}_2 + 10 \text{ H}_2 + \text{OC}(\text{=O})\text{C}=\text{C}(\text{C}(\text{=O})\text{O})\text{O} \rightarrow$<br>$\rightarrow \text{CC}(\text{=O})\text{O} + \text{O}=\text{CC}(\text{=O})\text{O} + \text{OC}(\text{=O})\text{C}(\text{=O})\text{C}(\text{C}(\text{=O})\text{O})\text{O} + 5 \text{ H}_2\text{O} + \text{CC}=\text{O}$        |
| 64.21.168 | 14    | 2     | -151.7 | 41.4  | $5 \text{ CO}_2 + 9 \text{ H}_2 + \text{OC}(\text{=O})\text{C}=\text{C}(\text{C}(\text{=O})\text{O})\text{O} \rightarrow$<br>$\rightarrow \text{CC}(\text{=O})\text{O} + \text{O}=\text{CC}(\text{=O})\text{O} + \text{OC}(\text{C}(\text{=O})\text{O})\text{C}(\text{=O})\text{O} + 4 \text{ H}_2\text{O} + \text{CC}=\text{O}$                            |
| 64.21.169 | 14    | 2     | -113.1 | 39.5  | $6 \text{ CO}_2 + 8 \text{ H}_2 \rightarrow \text{CC}(\text{=O})\text{O} + \text{OC}(\text{=O})\text{C}(\text{=O})\text{C}(\text{C}(\text{=O})\text{O})\text{O} + 4 \text{ H}_2\text{O}$                                                                                                                                                                    |
| 64.21.170 | 13    | 2     | -113.0 | 41.4  | $5 \text{ CO}_2 + 7 \text{ H}_2 \rightarrow \text{CC}(\text{=O})\text{O} + \text{OC}(\text{C}(\text{=O})\text{O})\text{C}(\text{=O})\text{O} + 3 \text{ H}_2\text{O}$                                                                                                                                                                                       |
| 64.21.171 | 14    | 2     | -142.3 | 39.5  | $6 \text{ CO}_2 + 9 \text{ H}_2 + \text{OC}(\text{=O})\text{C}=\text{C}(\text{C}(\text{=O})\text{O})\text{O} \rightarrow$<br>$\rightarrow \text{CC}(\text{=O})\text{O} + \text{OC}(\text{=O})\text{CC}(\text{C}(\text{=O})\text{O})\text{O} + \text{OC}(\text{=O})\text{C}(\text{=O})\text{C}(\text{C}(\text{=O})\text{O})\text{O} + 4 \text{ H}_2\text{O}$ |
| 64.21.172 | 13    | 2     | -142.2 | 41.4  | $5 \text{ CO}_2 + 8 \text{ H}_2 + \text{OC}(\text{=O})\text{C}=\text{C}(\text{C}(\text{=O})\text{O})\text{O} \rightarrow$<br>$\rightarrow \text{CC}(\text{=O})\text{O} + \text{OC}(\text{=O})\text{CC}(\text{C}(\text{=O})\text{O})\text{O} + \text{OC}(\text{C}(\text{=O})\text{O})\text{C}(\text{=O})\text{O} + 3 \text{ H}_2\text{O}$                    |
| 64.21.173 | 14    | 2     | -113.1 | 39.5  | $6 \text{ CO}_2 + 8 \text{ H}_2 \rightarrow \text{CC}(\text{=O})\text{O} + \text{OC}(\text{=O})\text{C}(\text{=O})\text{C}(\text{C}(\text{=O})\text{O})\text{O} + 4 \text{ H}_2\text{O}$                                                                                                                                                                    |
| 64.21.174 | 13    | 2     | -113.0 | 41.4  | $5 \text{ CO}_2 + 7 \text{ H}_2 \rightarrow \text{CC}(\text{=O})\text{O} + \text{OC}(\text{C}(\text{=O})\text{O})\text{C}(\text{=O})\text{O} + 3 \text{ H}_2\text{O}$                                                                                                                                                                                       |
| 64.21.175 | 14    | 2     | -142.3 | 39.5  | $6 \text{ CO}_2 + 9 \text{ H}_2 + \text{OC}(\text{=O})\text{C}=\text{C}(\text{C}(\text{=O})\text{O})\text{O} \rightarrow$<br>$\rightarrow \text{CC}(\text{=O})\text{O} + \text{OC}(\text{=O})\text{CC}(\text{C}(\text{=O})\text{O})\text{O} + \text{OC}(\text{=O})\text{C}(\text{=O})\text{C}(\text{C}(\text{=O})\text{O})\text{O} + 4 \text{ H}_2\text{O}$ |
| 64.21.176 | 13    | 2     | -142.2 | 41.4  | $5 \text{ CO}_2 + 8 \text{ H}_2 + \text{OC}(\text{=O})\text{C}=\text{C}(\text{C}(\text{=O})\text{O})\text{O} \rightarrow$<br>$\rightarrow \text{CC}(\text{=O})\text{O} + \text{OC}(\text{=O})\text{CC}(\text{C}(\text{=O})\text{O})\text{O} + \text{OC}(\text{C}(\text{=O})\text{O})\text{C}(\text{=O})\text{O} + 3 \text{ H}_2\text{O}$                    |
| 64.21.177 | 14    | 2     | -113.1 | 39.5  | $6 \text{ CO}_2 + 8 \text{ H}_2 \rightarrow \text{CC}(\text{=O})\text{O} + \text{OC}(\text{=O})\text{C}(\text{=O})\text{C}(\text{C}(\text{=O})\text{O})\text{O} + 4 \text{ H}_2\text{O}$                                                                                                                                                                    |

| Label     | $n_M$ | $n_B$ | $E_C$  | $E_H$ | Net reaction                                                                                                                                                                                                                                                                                                                                       |
|-----------|-------|-------|--------|-------|----------------------------------------------------------------------------------------------------------------------------------------------------------------------------------------------------------------------------------------------------------------------------------------------------------------------------------------------------|
| 64_21_178 | 13    | 2     | -113.0 | 41.4  | $5 \text{ CO}_2 + 7 \text{ H}_2 \rightarrow \text{CC}(=\text{O})\text{O} + \text{OC}(\text{C}(=\text{O})\text{O})\text{C}(=\text{O})\text{O} + 3 \text{ H}_2\text{O}$                                                                                                                                                                              |
| 64_21_179 | 15    | 3     | -137.2 | 39.5  | $6 \text{ CO}_2 + 9 \text{ H}_2 + \text{OC}(=\text{O})\text{C}=\text{C}(\text{C}(=\text{O})\text{O})\text{O} \rightarrow$<br>$\rightarrow 2 \text{ CC}(=\text{O})\text{O} + \text{O}=\text{CC}(=\text{O})\text{O} + \text{OC}(=\text{O})\text{C}(=\text{O})\text{C}(\text{C}(=\text{O})\text{O})\text{O} + 4 \text{ H}_2\text{O}$                  |
| 64_21_180 | 14    | 3     | -137.1 | 41.4  | $5 \text{ CO}_2 + 8 \text{ H}_2 + \text{OC}(=\text{O})\text{C}=\text{C}(\text{C}(=\text{O})\text{O})\text{O} \rightarrow$<br>$\rightarrow 2 \text{ CC}(=\text{O})\text{O} + \text{O}=\text{CC}(=\text{O})\text{O} + \text{OC}(\text{C}(=\text{O})\text{O})\text{C}(=\text{O})\text{O} + 3 \text{ H}_2\text{O}$                                     |
| 64_21_181 | 14    | 1     | -54.1  | 44.4  | $5 \text{ CO}_2 + 6 \text{ H}_2 \rightarrow 3 \text{ H}_2\text{O} + \text{OC}(=\text{O})\text{C}(=\text{O})\text{C}(\text{C}(=\text{O})\text{O})\text{O} + \text{C}=\text{O}$                                                                                                                                                                      |
| 64_21_182 | 13    | 1     | -54.0  | 46.2  | $4 \text{ CO}_2 + 5 \text{ H}_2 \rightarrow 2 \text{ H}_2\text{O} + \text{OC}(\text{C}(=\text{O})\text{O})\text{C}(=\text{O})\text{O} + \text{C}=\text{O}$                                                                                                                                                                                         |
| 64_21_183 | 15    | 1     | -78.1  | 44.4  | $5 \text{ CO}_2 + 7 \text{ H}_2 + \text{OC}(=\text{O})\text{C}=\text{C}(\text{C}(=\text{O})\text{O})\text{O} \rightarrow$<br>$\rightarrow \text{CC}(=\text{O})\text{O} + 3 \text{ H}_2\text{O} + \text{OC}(=\text{O})\text{C}(=\text{O})\text{C}(\text{C}(=\text{O})\text{O})\text{O} + \text{O}=\text{CC}(=\text{O})\text{O} + \text{C}=\text{O}$ |
| 64_21_184 | 14    | 1     | -78.0  | 46.2  | $4 \text{ CO}_2 + 6 \text{ H}_2 + \text{OC}(=\text{O})\text{C}=\text{C}(\text{C}(=\text{O})\text{O})\text{O} \rightarrow$<br>$\rightarrow \text{CC}(=\text{O})\text{O} + 2 \text{ H}_2\text{O} + \text{OC}(\text{C}(=\text{O})\text{O})\text{C}(=\text{O})\text{O} + \text{O}=\text{CC}(=\text{O})\text{O} + \text{C}=\text{O}$                    |
| 64_22_1   | 11    | 1     | -77.3  | 50.8  | $4 \text{ CO}_2 + 5 \text{ H}_2 \rightarrow \text{CC}(=\text{O})\text{O} + 2 \text{ H}_2\text{O} + \text{OC}(=\text{O})\text{C}(=\text{O})\text{O}$                                                                                                                                                                                                |
| 64_22_2   | 11    | 1     | -77.3  | 52.6  | $4 \text{ CO}_2 + 5 \text{ H}_2 \rightarrow \text{CC}(=\text{O})\text{O} + 2 \text{ H}_2\text{O} + \text{OC}(=\text{O})\text{C}(=\text{O})\text{O}$                                                                                                                                                                                                |
| 64_22_3   | 10    | 1     | -96.2  | 50.8  | $4 \text{ CO}_2 + 6 \text{ H}_2 \rightarrow \text{CC}(=\text{O})\text{O} + 3 \text{ H}_2\text{O} + \text{O}=\text{CC}(=\text{O})\text{O}$                                                                                                                                                                                                          |
| 64_22_4   | 10    | 1     | -96.2  | 52.6  | $4 \text{ CO}_2 + 6 \text{ H}_2 \rightarrow \text{CC}(=\text{O})\text{O} + 3 \text{ H}_2\text{O} + \text{O}=\text{CC}(=\text{O})\text{O}$                                                                                                                                                                                                          |
| 64_22_5   | 11    | 1     | -77.3  | 50.8  | $4 \text{ CO}_2 + 5 \text{ H}_2 \rightarrow \text{CC}(=\text{O})\text{O} + 2 \text{ H}_2\text{O} + \text{OC}(=\text{O})\text{C}(=\text{O})\text{O}$                                                                                                                                                                                                |
| 64_22_6   | 11    | 1     | -77.3  | 52.6  | $4 \text{ CO}_2 + 5 \text{ H}_2 \rightarrow \text{CC}(=\text{O})\text{O} + 2 \text{ H}_2\text{O} + \text{OC}(=\text{O})\text{C}(=\text{O})\text{O}$                                                                                                                                                                                                |
| 64_22_7   | 10    | 1     | -96.2  | 50.8  | $4 \text{ CO}_2 + 6 \text{ H}_2 \rightarrow \text{CC}(=\text{O})\text{O} + 3 \text{ H}_2\text{O} + \text{O}=\text{CC}(=\text{O})\text{O}$                                                                                                                                                                                                          |

| Label    | $n_M$ | $n_B$ | $E_C$  | $E_H$ | Net reaction                                                                                              |
|----------|-------|-------|--------|-------|-----------------------------------------------------------------------------------------------------------|
| 64_22_8  | 10    | 1     | -96.2  | 52.6  | $4 \text{ CO}_2 + 6 \text{ H}_2 \rightarrow \text{CC(=O)O} + 3 \text{ H}_2\text{O} + \text{O=CC(=O)O}$    |
| 64_22_9  | 11    | 0     | -91.9  | 43.9  | $4 \text{ CO}_2 + 6 \text{ H}_2 \rightarrow 3 \text{ H}_2\text{O} + \text{CC=O} + \text{OC(=O)C(=O)O}$    |
| 64_22_10 | 11    | 0     | -91.9  | 45.7  | $4 \text{ CO}_2 + 6 \text{ H}_2 \rightarrow 3 \text{ H}_2\text{O} + \text{CC=O} + \text{OC(=O)C(=O)O}$    |
| 64_22_11 | 11    | 1     | -110.8 | 43.9  | $4 \text{ CO}_2 + 7 \text{ H}_2 \rightarrow \text{O=CC(=O)O} + 4 \text{ H}_2\text{O} + \text{CC=O}$       |
| 64_22_12 | 11    | 1     | -110.8 | 45.7  | $4 \text{ CO}_2 + 7 \text{ H}_2 \rightarrow \text{O=CC(=O)O} + 4 \text{ H}_2\text{O} + \text{CC=O}$       |
| 64_22_13 | 11    | 0     | -91.9  | 43.9  | $4 \text{ CO}_2 + 6 \text{ H}_2 \rightarrow 3 \text{ H}_2\text{O} + \text{CC=O} + \text{OC(=O)C(=O)O}$    |
| 64_22_14 | 11    | 0     | -91.9  | 45.7  | $4 \text{ CO}_2 + 6 \text{ H}_2 \rightarrow 3 \text{ H}_2\text{O} + \text{CC=O} + \text{OC(=O)C(=O)O}$    |
| 64_22_15 | 11    | 1     | -110.8 | 43.9  | $4 \text{ CO}_2 + 7 \text{ H}_2 \rightarrow \text{O=CC(=O)O} + 4 \text{ H}_2\text{O} + \text{CC=O}$       |
| 64_22_16 | 11    | 1     | -110.8 | 45.7  | $4 \text{ CO}_2 + 7 \text{ H}_2 \rightarrow \text{O=CC(=O)O} + 4 \text{ H}_2\text{O} + \text{CC=O}$       |
| 64_22_17 | 11    | 1     | -77.3  | 43.9  | $4 \text{ CO}_2 + 5 \text{ H}_2 \rightarrow \text{CC(=O)O} + 2 \text{ H}_2\text{O} + \text{OC(=O)C(=O)O}$ |
| 64_22_18 | 11    | 1     | -77.3  | 45.7  | $4 \text{ CO}_2 + 5 \text{ H}_2 \rightarrow \text{CC(=O)O} + 2 \text{ H}_2\text{O} + \text{OC(=O)C(=O)O}$ |
| 64_22_19 | 10    | 1     | -101.4 | 43.9  | $4 \text{ CO}_2 + 6 \text{ H}_2 \rightarrow \text{OC(=O)CC(C(=O)O)O} + 3 \text{ H}_2\text{O}$             |
| 64_22_20 | 10    | 1     | -101.4 | 45.7  | $4 \text{ CO}_2 + 6 \text{ H}_2 \rightarrow \text{OC(=O)CC(C(=O)O)O} + 3 \text{ H}_2\text{O}$             |
| 64_22_21 | 11    | 1     | -77.3  | 43.9  | $4 \text{ CO}_2 + 5 \text{ H}_2 \rightarrow \text{CC(=O)O} + 2 \text{ H}_2\text{O} + \text{OC(=O)C(=O)O}$ |
| 64_22_22 | 11    | 1     | -77.3  | 45.7  | $4 \text{ CO}_2 + 5 \text{ H}_2 \rightarrow \text{CC(=O)O} + 2 \text{ H}_2\text{O} + \text{OC(=O)C(=O)O}$ |
| 64_22_23 | 10    | 1     | -101.4 | 43.9  | $4 \text{ CO}_2 + 6 \text{ H}_2 \rightarrow \text{OC(=O)CC(C(=O)O)O} + 3 \text{ H}_2\text{O}$             |
| 64_22_24 | 10    | 1     | -101.4 | 45.7  | $4 \text{ CO}_2 + 6 \text{ H}_2 \rightarrow \text{OC(=O)CC(C(=O)O)O} + 3 \text{ H}_2\text{O}$             |
| 64_22_25 | 11    | 1     | -77.3  | 43.9  | $4 \text{ CO}_2 + 5 \text{ H}_2 \rightarrow \text{CC(=O)O} + 2 \text{ H}_2\text{O} + \text{OC(=O)C(=O)O}$ |

| Label    | $n_M$ | $n_B$ | $E_C$ | $E_H$ | Net reaction                                                                                              |
|----------|-------|-------|-------|-------|-----------------------------------------------------------------------------------------------------------|
| 64_22_26 | 11    | 1     | -77.3 | 45.7  | $4 \text{ CO}_2 + 5 \text{ H}_2 \rightarrow \text{CC(=O)O} + 2 \text{ H}_2\text{O} + \text{OC(=O)C(=O)O}$ |
| 64_22_27 | 11    | 2     | -96.2 | 43.9  | $4 \text{ CO}_2 + 6 \text{ H}_2 \rightarrow \text{CC(=O)O} + \text{O=CC(=O)O} + 3 \text{ H}_2\text{O}$    |
| 64_22_28 | 11    | 2     | -96.2 | 45.7  | $4 \text{ CO}_2 + 6 \text{ H}_2 \rightarrow \text{CC(=O)O} + \text{O=CC(=O)O} + 3 \text{ H}_2\text{O}$    |
| 64_29.1  | 10    | 1     | -82.5 | 37.7  | $3 \text{ CO}_2 + 5 \text{ H}_2 \rightarrow \text{OC(=O)C(=O)C} + 3 \text{ H}_2\text{O}$                  |
| 64_29.2  | 10    | 1     | -82.5 | 37.7  | $3 \text{ CO}_2 + 5 \text{ H}_2 \rightarrow \text{OC(=O)C(=O)C} + 3 \text{ H}_2\text{O}$                  |
| 64_29.3  | 10    | 1     | -82.5 | 37.7  | $3 \text{ CO}_2 + 5 \text{ H}_2 \rightarrow \text{OC(=O)C(=O)C} + 3 \text{ H}_2\text{O}$                  |
| 64_29.4  | 10    | 1     | -82.5 | 46.0  | $3 \text{ CO}_2 + 5 \text{ H}_2 \rightarrow \text{OC(=O)C(=O)C} + 3 \text{ H}_2\text{O}$                  |
| 64_29.5  | 10    | 1     | -82.5 | 37.8  | $3 \text{ CO}_2 + 5 \text{ H}_2 \rightarrow \text{OC(=O)C(=O)C} + 3 \text{ H}_2\text{O}$                  |
| 64_29.6  | 10    | 1     | -82.5 | 45.5  | $3 \text{ CO}_2 + 5 \text{ H}_2 \rightarrow \text{OC(=O)C(=O)C} + 3 \text{ H}_2\text{O}$                  |
| 64_29.7  | 10    | 1     | -82.5 | 45.5  | $3 \text{ CO}_2 + 5 \text{ H}_2 \rightarrow \text{OC(=O)C(=O)C} + 3 \text{ H}_2\text{O}$                  |
| 64_29.8  | 10    | 1     | -82.5 | 45.5  | $3 \text{ CO}_2 + 5 \text{ H}_2 \rightarrow \text{OC(=O)C(=O)C} + 3 \text{ H}_2\text{O}$                  |
| 64_29.9  | 10    | 1     | -82.5 | 46.1  | $3 \text{ CO}_2 + 5 \text{ H}_2 \rightarrow \text{OC(=O)C(=O)C} + 3 \text{ H}_2\text{O}$                  |
| 64_29.10 | 10    | 1     | -82.5 | 34.7  | $3 \text{ CO}_2 + 5 \text{ H}_2 \rightarrow \text{OC(=O)C(=O)C} + 3 \text{ H}_2\text{O}$                  |
| 64_29.11 | 10    | 1     | -82.5 | 34.7  | $3 \text{ CO}_2 + 5 \text{ H}_2 \rightarrow \text{OC(=O)C(=O)C} + 3 \text{ H}_2\text{O}$                  |
| 64_29.12 | 10    | 1     | -82.5 | 34.7  | $3 \text{ CO}_2 + 5 \text{ H}_2 \rightarrow \text{OC(=O)C(=O)C} + 3 \text{ H}_2\text{O}$                  |
| 64_29.13 | 10    | 1     | -82.5 | 43.0  | $3 \text{ CO}_2 + 5 \text{ H}_2 \rightarrow \text{OC(=O)C(=O)C} + 3 \text{ H}_2\text{O}$                  |
| 64_29.14 | 10    | 1     | -82.5 | 34.9  | $3 \text{ CO}_2 + 5 \text{ H}_2 \rightarrow \text{OC(=O)C(=O)C} + 3 \text{ H}_2\text{O}$                  |
| 64_29.15 | 10    | 1     | -82.5 | 41.1  | $3 \text{ CO}_2 + 5 \text{ H}_2 \rightarrow \text{OC(=O)C(=O)C} + 3 \text{ H}_2\text{O}$                  |

| Label    | $n_M$ | $n_B$ | $E_C$  | $E_H$ | Net reaction                                                                                                                                                                |
|----------|-------|-------|--------|-------|-----------------------------------------------------------------------------------------------------------------------------------------------------------------------------|
| 64.29.16 | 10    | 1     | -82.5  | 48.8  | $3 \text{ CO}_2 + 5 \text{ H}_2 \rightarrow \text{OC(=O)C(=O)C} + 3 \text{ H}_2\text{O}$                                                                                    |
| 64.29.17 | 10    | 1     | -82.5  | 40.7  | $3 \text{ CO}_2 + 5 \text{ H}_2 \rightarrow \text{OC(=O)C(=O)C} + 3 \text{ H}_2\text{O}$                                                                                    |
| 64.48.1  | 18    | 0     | -161.2 | 37.8  | $5 \text{ CO}_2 + 10 \text{ H}_2 \rightarrow 5 \text{ H}_2\text{O} + \text{OCC(=O)O} + \text{CC=O} + \text{C=O}$                                                            |
| 64.48.2  | 18    | 0     | -161.2 | 33.5  | $5 \text{ CO}_2 + 10 \text{ H}_2 \rightarrow 5 \text{ H}_2\text{O} + \text{OCC(=O)O} + \text{CC=O} + \text{C=O}$                                                            |
| 64.48.3  | 18    | 0     | -161.2 | 34.0  | $5 \text{ CO}_2 + 10 \text{ H}_2 \rightarrow 5 \text{ H}_2\text{O} + \text{OCC(=O)O} + \text{CC=O} + \text{C=O}$                                                            |
| 64.48.7  | 17    | 0     | -151.2 | 39.2  | $5 \text{ CO}_2 + 10 \text{ H}_2 + \text{CC=CC(=O)O} \rightarrow$<br>$\rightarrow 4 \text{ H}_2\text{O} + \text{CCC(C(=O)O)O} + \text{OCC(=O)O} + \text{CC=O} + \text{C=O}$ |
| 64.48.8  | 17    | 0     | -151.2 | 39.2  | $5 \text{ CO}_2 + 10 \text{ H}_2 + \text{CC=CC(=O)O} \rightarrow$<br>$\rightarrow 4 \text{ H}_2\text{O} + \text{CCC(C(=O)O)O} + \text{OCC(=O)O} + \text{CC=O} + \text{C=O}$ |
| 64.48.9  | 17    | 0     | -151.2 | 39.2  | $5 \text{ CO}_2 + 10 \text{ H}_2 + \text{CC=CC(=O)O} \rightarrow$<br>$\rightarrow 4 \text{ H}_2\text{O} + \text{CCC(C(=O)O)O} + \text{OCC(=O)O} + \text{CC=O} + \text{C=O}$ |
| 64.48.10 | 17    | 0     | -151.2 | 39.2  | $5 \text{ CO}_2 + 10 \text{ H}_2 + \text{CC=CC(=O)O} \rightarrow$<br>$\rightarrow 4 \text{ H}_2\text{O} + \text{CCC(C(=O)O)O} + \text{OCC(=O)O} + \text{CC=O} + \text{C=O}$ |
| 64.48.11 | 17    | 0     | -151.2 | 39.2  | $5 \text{ CO}_2 + 10 \text{ H}_2 + \text{CC=CC(=O)O} \rightarrow$<br>$\rightarrow 4 \text{ H}_2\text{O} + \text{CCC(C(=O)O)O} + \text{OCC(=O)O} + \text{CC=O} + \text{C=O}$ |
| 64.48.12 | 17    | 0     | -151.2 | 39.2  | $5 \text{ CO}_2 + 10 \text{ H}_2 + \text{CC=CC(=O)O} \rightarrow$<br>$\rightarrow 4 \text{ H}_2\text{O} + \text{CCC(C(=O)O)O} + \text{OCC(=O)O} + \text{CC=O} + \text{C=O}$ |
| 64.48.13 | 16    | 0     | -129.2 | 40.1  | $5 \text{ CO}_2 + 9 \text{ H}_2 + \text{CC=CC(=O)O} \rightarrow$                                                                                                            |



| Label    | $n_M$ | $n_B$ | $E_C$  | $E_H$ | Net reaction                                                                                                                                                                                                                                          |
|----------|-------|-------|--------|-------|-------------------------------------------------------------------------------------------------------------------------------------------------------------------------------------------------------------------------------------------------------|
|          |       |       |        |       | $\rightarrow 4 \text{H}_2\text{O} + \text{CCC}(=\text{O})\text{C}(=\text{O})\text{O} + \text{OCC}(=\text{O})\text{O} + \text{CC}=\text{O} + \text{C}=\text{O}$                                                                                        |
| 64_48_14 | 16    | 0     | -129.2 | 40.1  | $5 \text{CO}_2 + 9 \text{H}_2 + \text{CC}=\text{CC}(=\text{O})\text{O} \rightarrow$<br>$\rightarrow 4 \text{H}_2\text{O} + \text{CCC}(=\text{O})\text{C}(=\text{O})\text{O} + \text{OCC}(=\text{O})\text{O} + \text{CC}=\text{O} + \text{C}=\text{O}$ |
| 64_48_15 | 16    | 0     | -129.2 | 40.1  | $5 \text{CO}_2 + 9 \text{H}_2 + \text{CC}=\text{CC}(=\text{O})\text{O} \rightarrow$<br>$\rightarrow 4 \text{H}_2\text{O} + \text{CCC}(=\text{O})\text{C}(=\text{O})\text{O} + \text{OCC}(=\text{O})\text{O} + \text{CC}=\text{O} + \text{C}=\text{O}$ |
| 64_48_16 | 15    | 0     | -124.7 | 40.7  | $4 \text{CO}_2 + 8 \text{H}_2 + \text{CC}=\text{CC}(=\text{O})\text{O} \rightarrow$<br>$\rightarrow 3 \text{H}_2\text{O} + \text{CCC}(=\text{O})\text{O} + \text{OCC}(=\text{O})\text{O} + \text{CC}=\text{O} + \text{C}=\text{O}$                    |
| 64_49_1  | 10    | 0     | -120.5 | 30.9  | $3 \text{CO}_2 + 7 \text{H}_2 \rightarrow 4 \text{H}_2\text{O} + \text{C}=\text{O} + \text{CC}=\text{O}$                                                                                                                                              |
| 64_49_2  | 10    | 0     | -109.6 | 30.6  | $3 \text{CO}_2 + 6 \text{H}_2 \rightarrow 3 \text{H}_2\text{O} + \text{OC}=\text{O} + \text{CC}=\text{O}$                                                                                                                                             |
| 64_49_3  | 10    | 0     | -120.5 | 26.6  | $3 \text{CO}_2 + 7 \text{H}_2 \rightarrow 4 \text{H}_2\text{O} + \text{C}=\text{O} + \text{CC}=\text{O}$                                                                                                                                              |
| 64_49_4  | 10    | 0     | -109.6 | 26.3  | $3 \text{CO}_2 + 6 \text{H}_2 \rightarrow 3 \text{H}_2\text{O} + \text{OC}=\text{O} + \text{CC}=\text{O}$                                                                                                                                             |
| 64_49_5  | 10    | 0     | -120.5 | 27.2  | $3 \text{CO}_2 + 7 \text{H}_2 \rightarrow 4 \text{H}_2\text{O} + \text{C}=\text{O} + \text{CC}=\text{O}$                                                                                                                                              |
| 64_49_6  | 10    | 0     | -109.6 | 26.8  | $3 \text{CO}_2 + 6 \text{H}_2 \rightarrow 3 \text{H}_2\text{O} + \text{OC}=\text{O} + \text{CC}=\text{O}$                                                                                                                                             |
| 64_49_7  | 10    | 0     | -120.5 | 28.5  | $3 \text{CO}_2 + 7 \text{H}_2 \rightarrow 4 \text{H}_2\text{O} + \text{CC}=\text{O} + \text{C}=\text{O}$                                                                                                                                              |
| 64_49_8  | 10    | 0     | -109.6 | 28.2  | $3 \text{CO}_2 + 6 \text{H}_2 \rightarrow 3 \text{H}_2\text{O} + \text{OC}=\text{O} + \text{CC}=\text{O}$                                                                                                                                             |
| 64_49_9  | 10    | 0     | -120.5 | 28.5  | $3 \text{CO}_2 + 7 \text{H}_2 \rightarrow 4 \text{H}_2\text{O} + \text{CC}=\text{O} + \text{C}=\text{O}$                                                                                                                                              |
| 64_49_10 | 10    | 0     | -109.6 | 28.2  | $3 \text{CO}_2 + 6 \text{H}_2 \rightarrow 3 \text{H}_2\text{O} + \text{OC}=\text{O} + \text{CC}=\text{O}$                                                                                                                                             |
| 64_49_11 | 10    | 1     | -105.9 | 32.1  | $3 \text{CO}_2 + 6 \text{H}_2 \rightarrow \text{CC}(=\text{O})\text{O} + 3 \text{H}_2\text{O} + \text{C}=\text{O}$                                                                                                                                    |

| Label    | $n_M$ | $n_B$ | $E_C$  | $E_H$ | Net reaction                                                                                      |
|----------|-------|-------|--------|-------|---------------------------------------------------------------------------------------------------|
| 64.49.12 | 10    | 1     | -95.0  | 32.1  | $3 \text{ CO}_2 + 5 \text{ H}_2 \rightarrow \text{CC(=O)O} + 2 \text{ H}_2\text{O} + \text{OC=O}$ |
| 64.49.13 | 10    | 1     | -105.9 | 36.8  | $3 \text{ CO}_2 + 6 \text{ H}_2 \rightarrow \text{CC(=O)O} + 3 \text{ H}_2\text{O} + \text{C=O}$  |
| 64.49.14 | 10    | 1     | -95.0  | 36.8  | $3 \text{ CO}_2 + 5 \text{ H}_2 \rightarrow \text{CC(=O)O} + 2 \text{ H}_2\text{O} + \text{OC=O}$ |
| 64.49.15 | 10    | 1     | -105.9 | 36.8  | $3 \text{ CO}_2 + 6 \text{ H}_2 \rightarrow \text{CC(=O)O} + 3 \text{ H}_2\text{O} + \text{C=O}$  |
| 64.49.16 | 9     | 1     | -84.1  | 36.8  | $3 \text{ CO}_2 + 5 \text{ H}_2 \rightarrow 2 \text{ H}_2\text{O} + \text{OC(CC(=O)O)O}$          |
| 64.69.1  | 10    | 1     | -105.9 | 39.1  | $3 \text{ CO}_2 + 6 \text{ H}_2 \rightarrow \text{CC(=O)O} + 3 \text{ H}_2\text{O} + \text{C=O}$  |
| 64.69.2  | 10    | 1     | -105.9 | 37.5  | $3 \text{ CO}_2 + 6 \text{ H}_2 \rightarrow \text{CC(=O)O} + 3 \text{ H}_2\text{O} + \text{C=O}$  |
| 64.69.4  | 9     | 1     | -84.1  | 39.1  | $3 \text{ CO}_2 + 5 \text{ H}_2 \rightarrow 2 \text{ H}_2\text{O} + \text{OC(CC(=O)O)O}$          |
| 64.69.5  | 9     | 1     | -84.1  | 37.5  | $3 \text{ CO}_2 + 5 \text{ H}_2 \rightarrow 2 \text{ H}_2\text{O} + \text{OC(CC(=O)O)O}$          |
| 64.71.1  | 4     | 0     | -13.8  | 29.0  | $2 \text{ CO}_2 + 2 \text{ H}_2 \rightarrow \text{H}_2\text{O} + \text{O=CC(=O)O}$                |
| 64.79.2  | 4     | 0     | -13.8  | 33.7  | $2 \text{ CO}_2 + 2 \text{ H}_2 \rightarrow \text{H}_2\text{O} + \text{O=CC(=O)O}$                |
| 64.81.1  | 3     | 0     | -12.6  | 21.3  | $\text{CO}_2 + \text{H}_2 \rightarrow \text{OC=O}$                                                |
| 64.85.1  | 8     | 0     | -36.1  | 32.0  | $3 \text{ CO}_2 + 4 \text{ H}_2 \rightarrow \text{H}_2\text{O} + \text{C=O} + \text{OC(=O)C(O)O}$ |
| 64.87.1  | 5     | 0     | -23.4  | 29.0  | $\text{CO}_2 + 2 \text{ H}_2 \rightarrow \text{H}_2\text{O} + \text{C=O}$                         |
| 64.90.1  | 10    | 0     | -120.5 | 30.8  | $3 \text{ CO}_2 + 7 \text{ H}_2 \rightarrow 4 \text{ H}_2\text{O} + \text{CC=O} + \text{C=O}$     |
| 64.90.2  | 10    | 0     | -120.5 | 29.2  | $3 \text{ CO}_2 + 7 \text{ H}_2 \rightarrow 4 \text{ H}_2\text{O} + \text{CC=O} + \text{C=O}$     |
| 64.90.4  | 10    | 0     | -109.6 | 30.5  | $3 \text{ CO}_2 + 6 \text{ H}_2 \rightarrow 3 \text{ H}_2\text{O} + \text{OC=O} + \text{CC=O}$    |
| 64.90.5  | 10    | 0     | -109.6 | 28.9  | $3 \text{ CO}_2 + 6 \text{ H}_2 \rightarrow 3 \text{ H}_2\text{O} + \text{OC=O} + \text{CC=O}$    |

| Label    | $n_M$ | $n_B$ | $E_C$  | $E_H$ | Net reaction                                                                                                                   |
|----------|-------|-------|--------|-------|--------------------------------------------------------------------------------------------------------------------------------|
| 64.90.7  | 10    | 0     | -120.5 | 30.8  | $3 \text{ CO}_2 + 7 \text{ H}_2 \rightarrow 4 \text{ H}_2\text{O} + \text{CC}=\text{O} + \text{C}=\text{O}$                    |
| 64.90.8  | 10    | 0     | -120.5 | 29.2  | $3 \text{ CO}_2 + 7 \text{ H}_2 \rightarrow 4 \text{ H}_2\text{O} + \text{CC}=\text{O} + \text{C}=\text{O}$                    |
| 64.90.10 | 10    | 0     | -109.6 | 30.5  | $3 \text{ CO}_2 + 6 \text{ H}_2 \rightarrow 3 \text{ H}_2\text{O} + \text{OC}=\text{O} + \text{CC}=\text{O}$                   |
| 64.90.11 | 10    | 0     | -109.6 | 28.9  | $3 \text{ CO}_2 + 6 \text{ H}_2 \rightarrow 3 \text{ H}_2\text{O} + \text{OC}=\text{O} + \text{CC}=\text{O}$                   |
| 64.90.13 | 10    | 1     | -105.9 | 34.4  | $3 \text{ CO}_2 + 6 \text{ H}_2 \rightarrow \text{CC}(=\text{O})\text{O} + 3 \text{ H}_2\text{O} + \text{C}=\text{O}$          |
| 64.90.14 | 10    | 1     | -105.9 | 32.7  | $3 \text{ CO}_2 + 6 \text{ H}_2 \rightarrow \text{CC}(=\text{O})\text{O} + 3 \text{ H}_2\text{O} + \text{C}=\text{O}$          |
| 64.90.16 | 10    | 1     | -95.0  | 34.4  | $3 \text{ CO}_2 + 5 \text{ H}_2 \rightarrow \text{CC}(=\text{O})\text{O} + 2 \text{ H}_2\text{O} + \text{OC}=\text{O}$         |
| 64.90.17 | 10    | 1     | -95.0  | 32.7  | $3 \text{ CO}_2 + 5 \text{ H}_2 \rightarrow \text{CC}(=\text{O})\text{O} + 2 \text{ H}_2\text{O} + \text{OC}=\text{O}$         |
| 64.90.19 | 10    | 1     | -105.9 | 39.1  | $3 \text{ CO}_2 + 6 \text{ H}_2 \rightarrow \text{CC}(=\text{O})\text{O} + 3 \text{ H}_2\text{O} + \text{C}=\text{O}$          |
| 64.90.20 | 10    | 1     | -105.9 | 37.5  | $3 \text{ CO}_2 + 6 \text{ H}_2 \rightarrow \text{CC}(=\text{O})\text{O} + 3 \text{ H}_2\text{O} + \text{C}=\text{O}$          |
| 64.90.22 | 10    | 1     | -95.0  | 39.1  | $3 \text{ CO}_2 + 5 \text{ H}_2 \rightarrow \text{CC}(=\text{O})\text{O} + 2 \text{ H}_2\text{O} + \text{OC}=\text{O}$         |
| 64.90.23 | 10    | 1     | -95.0  | 37.5  | $3 \text{ CO}_2 + 5 \text{ H}_2 \rightarrow \text{CC}(=\text{O})\text{O} + 2 \text{ H}_2\text{O} + \text{OC}=\text{O}$         |
| 64.92.1  | 7     | 0     | -37.2  | 27.4  | $3 \text{ CO}_2 + 4 \text{ H}_2 \rightarrow 2 \text{ H}_2\text{O} + \text{O}=\text{CC}(=\text{O})\text{O} + \text{C}=\text{O}$ |
| 64.92.2  | 7     | 0     | -97.1  | 25.0  | $2 \text{ CO}_2 + 5 \text{ H}_2 \rightarrow 3 \text{ H}_2\text{O} + \text{CC}=\text{O}$                                        |
| 64.92.3  | 7     | 0     | -97.1  | 29.3  | $2 \text{ CO}_2 + 5 \text{ H}_2 \rightarrow 3 \text{ H}_2\text{O} + \text{CC}=\text{O}$                                        |
| 64.95.1  | 5     | 0     | -23.4  | 32.0  | $\text{CO}_2 + 2 \text{ H}_2 \rightarrow \text{H}_2\text{O} + \text{C}=\text{O}$                                               |
| 64.107.2 | 7     | 0     | -37.2  | 32.4  | $3 \text{ CO}_2 + 4 \text{ H}_2 \rightarrow 2 \text{ H}_2\text{O} + \text{O}=\text{CC}(=\text{O})\text{O} + \text{C}=\text{O}$ |
| 64.113.1 | 7     | 0     | -23.4  | 42.3  | $\text{CO}_2 + 2 \text{ H}_2 \rightarrow \text{H}_2\text{O} + \text{C}=\text{O}$                                               |

| Label     | $n_M$ | $n_B$ | $E_C$  | $E_H$ | Net reaction                                                                                                        |
|-----------|-------|-------|--------|-------|---------------------------------------------------------------------------------------------------------------------|
| 64_113_2  | 7     | 0     | -23.4  | 42.3  | $\text{CO}_2 + 2 \text{H}_2 \rightarrow \text{H}_2\text{O} + \text{C}=\text{O}$                                     |
| 64_113_4  | 7     | 0     | -23.4  | 42.3  | $\text{CO}_2 + 2 \text{H}_2 \rightarrow \text{H}_2\text{O} + \text{C}=\text{O}$                                     |
| 64_115_1  | 14    | 1     | -105.9 | 39.0  | $3 \text{CO}_2 + 6 \text{H}_2 \rightarrow \text{CC}(=\text{O})\text{O} + 3 \text{H}_2\text{O} + \text{C}=\text{O}$  |
| 64_115_2  | 14    | 1     | -95.0  | 39.0  | $3 \text{CO}_2 + 5 \text{H}_2 \rightarrow \text{CC}(=\text{O})\text{O} + 2 \text{H}_2\text{O} + \text{OC}=\text{O}$ |
| 64_115_3  | 14    | 1     | -105.9 | 34.7  | $3 \text{CO}_2 + 6 \text{H}_2 \rightarrow \text{CC}(=\text{O})\text{O} + 3 \text{H}_2\text{O} + \text{C}=\text{O}$  |
| 64_115_4  | 14    | 1     | -95.0  | 34.7  | $3 \text{CO}_2 + 5 \text{H}_2 \rightarrow \text{CC}(=\text{O})\text{O} + 2 \text{H}_2\text{O} + \text{OC}=\text{O}$ |
| 64_115_5  | 14    | 1     | -105.9 | 35.2  | $3 \text{CO}_2 + 6 \text{H}_2 \rightarrow \text{CC}(=\text{O})\text{O} + 3 \text{H}_2\text{O} + \text{C}=\text{O}$  |
| 64_115_6  | 14    | 1     | -95.0  | 35.2  | $3 \text{CO}_2 + 5 \text{H}_2 \rightarrow \text{CC}(=\text{O})\text{O} + 2 \text{H}_2\text{O} + \text{OC}=\text{O}$ |
| 64_115_7  | 14    | 1     | -105.9 | 32.5  | $3 \text{CO}_2 + 6 \text{H}_2 \rightarrow \text{CC}(=\text{O})\text{O} + 3 \text{H}_2\text{O} + \text{C}=\text{O}$  |
| 64_115_8  | 14    | 1     | -95.0  | 32.5  | $3 \text{CO}_2 + 5 \text{H}_2 \rightarrow \text{CC}(=\text{O})\text{O} + 2 \text{H}_2\text{O} + \text{OC}=\text{O}$ |
| 64_115_9  | 14    | 1     | -105.9 | 35.2  | $3 \text{CO}_2 + 6 \text{H}_2 \rightarrow \text{CC}(=\text{O})\text{O} + 3 \text{H}_2\text{O} + \text{C}=\text{O}$  |
| 64_115_10 | 14    | 1     | -95.0  | 35.2  | $3 \text{CO}_2 + 5 \text{H}_2 \rightarrow \text{CC}(=\text{O})\text{O} + 2 \text{H}_2\text{O} + \text{OC}=\text{O}$ |
| 64_115_11 | 14    | 1     | -105.9 | 35.2  | $3 \text{CO}_2 + 6 \text{H}_2 \rightarrow \text{CC}(=\text{O})\text{O} + 3 \text{H}_2\text{O} + \text{C}=\text{O}$  |
| 64_115_12 | 14    | 1     | -95.0  | 35.2  | $3 \text{CO}_2 + 5 \text{H}_2 \rightarrow \text{CC}(=\text{O})\text{O} + 2 \text{H}_2\text{O} + \text{OC}=\text{O}$ |
| 64_115_13 | 14    | 1     | -105.9 | 31.8  | $3 \text{CO}_2 + 6 \text{H}_2 \rightarrow \text{CC}(=\text{O})\text{O} + 3 \text{H}_2\text{O} + \text{C}=\text{O}$  |
| 64_115_14 | 14    | 1     | -95.0  | 31.8  | $3 \text{CO}_2 + 5 \text{H}_2 \rightarrow \text{CC}(=\text{O})\text{O} + 2 \text{H}_2\text{O} + \text{OC}=\text{O}$ |
| 64_115_15 | 14    | 1     | -105.9 | 35.2  | $3 \text{CO}_2 + 6 \text{H}_2 \rightarrow \text{CC}(=\text{O})\text{O} + 3 \text{H}_2\text{O} + \text{C}=\text{O}$  |
| 64_115_16 | 14    | 1     | -95.0  | 35.2  | $3 \text{CO}_2 + 5 \text{H}_2 \rightarrow \text{CC}(=\text{O})\text{O} + 2 \text{H}_2\text{O} + \text{OC}=\text{O}$ |

| Label     | $n_M$ | $n_B$ | $E_C$  | $E_H$ | Net reaction                                                                                                                                                                                                     |
|-----------|-------|-------|--------|-------|------------------------------------------------------------------------------------------------------------------------------------------------------------------------------------------------------------------|
| 64.115.17 | 14    | 1     | -105.9 | 35.2  | $3 \text{ CO}_2 + 6 \text{ H}_2 \rightarrow \text{CC}(=\text{O})\text{O} + 3 \text{ H}_2\text{O} + \text{C}=\text{O}$                                                                                            |
| 64.115.18 | 14    | 1     | -95.0  | 35.2  | $3 \text{ CO}_2 + 5 \text{ H}_2 \rightarrow \text{CC}(=\text{O})\text{O} + 2 \text{ H}_2\text{O} + \text{OC}=\text{O}$                                                                                           |
| 64.115.19 | 13    | 1     | -105.9 | 35.2  | $3 \text{ CO}_2 + 6 \text{ H}_2 \rightarrow \text{CC}(=\text{O})\text{O} + 3 \text{ H}_2\text{O} + \text{C}=\text{O}$                                                                                            |
| 64.115.20 | 14    | 1     | -95.0  | 35.2  | $3 \text{ CO}_2 + 5 \text{ H}_2 \rightarrow \text{CC}(=\text{O})\text{O} + 2 \text{ H}_2\text{O} + \text{OC}=\text{O}$                                                                                           |
| 64.115.21 | 12    | 1     | -83.7  | 32.0  | $3 \text{ CO}_2 + 5 \text{ H}_2 + \text{OCCC}(=\text{O})\text{O} \rightarrow$<br>$\rightarrow \text{CC}(=\text{O})\text{O} + \text{OC}=\text{CC}(=\text{O})\text{O} + 3 \text{ H}_2\text{O} + \text{C}=\text{O}$ |
| 64.132.3  | 7     | 0     | -97.1  | 25.6  | $2 \text{ CO}_2 + 5 \text{ H}_2 \rightarrow 3 \text{ H}_2\text{O} + \text{CC}=\text{O}$                                                                                                                          |
| 64.134.1  | 7     | 0     | -27.5  | 41.4  | $4 \text{ CO}_2 + 4 \text{ H}_2 \rightarrow 2 \text{ H}_2\text{O} + 2 \text{ H}_2\text{O}=\text{CC}(=\text{O})\text{O}$                                                                                          |
| 64.134.2  | 7     | 0     | -27.5  | 41.4  | $4 \text{ CO}_2 + 4 \text{ H}_2 \rightarrow 2 \text{ H}_2\text{O} + 2 \text{ H}_2\text{O}=\text{CC}(=\text{O})\text{O}$                                                                                          |
| 64.145.4  | 7     | 0     | -23.4  | 34.2  | $\text{CO}_2 + 2 \text{ H}_2 \rightarrow \text{H}_2\text{O} + \text{C}=\text{O}$                                                                                                                                 |
| 64.145.5  | 7     | 0     | -23.4  | 34.2  | $\text{CO}_2 + 2 \text{ H}_2 \rightarrow \text{H}_2\text{O} + \text{C}=\text{O}$                                                                                                                                 |
| 64.154.1  | 9     | 0     | -58.0  | 26.7  | $2 \text{ CO}_2 + 4 \text{ H}_2 \rightarrow 2 \text{ H}_2\text{O} + \text{OCC}=\text{O}$                                                                                                                         |
| 64.154.2  | 9     | 0     | -58.0  | 28.1  | $2 \text{ CO}_2 + 4 \text{ H}_2 \rightarrow 2 \text{ H}_2\text{O} + \text{OCC}=\text{O}$                                                                                                                         |
| 64.154.3  | 9     | 0     | -37.2  | 29.3  | $3 \text{ CO}_2 + 4 \text{ H}_2 \rightarrow 2 \text{ H}_2\text{O} + \text{O}=\text{CC}(=\text{O})\text{O} + \text{C}=\text{O}$                                                                                   |
| 64.154.4  | 9     | 0     | -97.1  | 35.4  | $2 \text{ CO}_2 + 5 \text{ H}_2 \rightarrow 3 \text{ H}_2\text{O} + \text{CC}=\text{O}$                                                                                                                          |
| 64.154.5  | 9     | 0     | -97.1  | 34.6  | $2 \text{ CO}_2 + 5 \text{ H}_2 \rightarrow 3 \text{ H}_2\text{O} + \text{CC}=\text{O}$                                                                                                                          |
| 64.154.6  | 9     | 0     | -97.1  | 24.8  | $2 \text{ CO}_2 + 5 \text{ H}_2 \rightarrow 3 \text{ H}_2\text{O} + \text{CC}=\text{O}$                                                                                                                          |
| 64.154.8  | 9     | 0     | -37.2  | 29.3  | $3 \text{ CO}_2 + 4 \text{ H}_2 \rightarrow 2 \text{ H}_2\text{O} + \text{C}=\text{O} + \text{O}=\text{CC}(=\text{O})\text{O}$                                                                                   |

| Label     | $n_M$ | $n_B$ | $E_C$ | $E_H$ | Net reaction                                                                                                                   |
|-----------|-------|-------|-------|-------|--------------------------------------------------------------------------------------------------------------------------------|
| 64.154.9  | 9     | 0     | -37.2 | 29.3  | $3 \text{ CO}_2 + 4 \text{ H}_2 \rightarrow 2 \text{ H}_2\text{O} + \text{C}=\text{O} + \text{O}=\text{CC}(=\text{O})\text{O}$ |
| 64.154.11 | 9     | 0     | -58.0 | 30.9  | $2 \text{ CO}_2 + 4 \text{ H}_2 \rightarrow 2 \text{ H}_2\text{O} + \text{OCC}=\text{O}$                                       |
| 64.154.12 | 9     | 0     | -58.0 | 30.9  | $2 \text{ CO}_2 + 4 \text{ H}_2 \rightarrow 2 \text{ H}_2\text{O} + \text{OCC}=\text{O}$                                       |
| 64.154.13 | 9     | 0     | -37.2 | 34.0  | $3 \text{ CO}_2 + 4 \text{ H}_2 \rightarrow 2 \text{ H}_2\text{O} + \text{O}=\text{CC}(=\text{O})\text{O} + \text{C}=\text{O}$ |
| 64.154.14 | 9     | 0     | -97.1 | 35.4  | $2 \text{ CO}_2 + 5 \text{ H}_2 \rightarrow 3 \text{ H}_2\text{O} + \text{CC}=\text{O}$                                        |
| 64.154.15 | 9     | 0     | -97.1 | 34.6  | $2 \text{ CO}_2 + 5 \text{ H}_2 \rightarrow 3 \text{ H}_2\text{O} + \text{CC}=\text{O}$                                        |
| 64.154.16 | 9     | 0     | -97.1 | 27.6  | $2 \text{ CO}_2 + 5 \text{ H}_2 \rightarrow 3 \text{ H}_2\text{O} + \text{CC}=\text{O}$                                        |
| 64.154.18 | 9     | 0     | -37.2 | 34.0  | $3 \text{ CO}_2 + 4 \text{ H}_2 \rightarrow 2 \text{ H}_2\text{O} + \text{C}=\text{O} + \text{O}=\text{CC}(=\text{O})\text{O}$ |
| 64.154.19 | 9     | 0     | -37.2 | 34.0  | $3 \text{ CO}_2 + 4 \text{ H}_2 \rightarrow 2 \text{ H}_2\text{O} + \text{C}=\text{O} + \text{O}=\text{CC}(=\text{O})\text{O}$ |
| 64.154.21 | 9     | 0     | -58.0 | 30.9  | $2 \text{ CO}_2 + 4 \text{ H}_2 \rightarrow 2 \text{ H}_2\text{O} + \text{OCC}=\text{O}$                                       |
| 64.154.22 | 9     | 0     | -58.0 | 30.9  | $2 \text{ CO}_2 + 4 \text{ H}_2 \rightarrow 2 \text{ H}_2\text{O} + \text{OCC}=\text{O}$                                       |
| 64.154.23 | 9     | 0     | -37.2 | 34.0  | $3 \text{ CO}_2 + 4 \text{ H}_2 \rightarrow 2 \text{ H}_2\text{O} + \text{O}=\text{CC}(=\text{O})\text{O} + \text{C}=\text{O}$ |
| 64.154.24 | 9     | 0     | -97.1 | 35.4  | $2 \text{ CO}_2 + 5 \text{ H}_2 \rightarrow 3 \text{ H}_2\text{O} + \text{CC}=\text{O}$                                        |
| 64.154.25 | 9     | 0     | -97.1 | 34.6  | $2 \text{ CO}_2 + 5 \text{ H}_2 \rightarrow 3 \text{ H}_2\text{O} + \text{CC}=\text{O}$                                        |
| 64.154.26 | 9     | 0     | -97.1 | 27.6  | $2 \text{ CO}_2 + 5 \text{ H}_2 \rightarrow 3 \text{ H}_2\text{O} + \text{CC}=\text{O}$                                        |
| 64.154.27 | 9     | 0     | -97.1 | 29.8  | $2 \text{ CO}_2 + 5 \text{ H}_2 \rightarrow 3 \text{ H}_2\text{O} + \text{CC}=\text{O}$                                        |
| 64.154.28 | 9     | 0     | -37.2 | 34.0  | $3 \text{ CO}_2 + 4 \text{ H}_2 \rightarrow 2 \text{ H}_2\text{O} + \text{C}=\text{O} + \text{O}=\text{CC}(=\text{O})\text{O}$ |
| 64.154.29 | 8     | 0     | -37.2 | 34.0  | $3 \text{ CO}_2 + 4 \text{ H}_2 \rightarrow 2 \text{ H}_2\text{O} + \text{C}=\text{O} + \text{O}=\text{CC}(=\text{O})\text{O}$ |

| Label     | $n_M$ | $n_B$ | $E_C$  | $E_H$ | Net reaction                                                                                                                                        |
|-----------|-------|-------|--------|-------|-----------------------------------------------------------------------------------------------------------------------------------------------------|
| 64_154_30 | 9     | 0     | -37.2  | 32.4  | $3 \text{ CO}_2 + 4 \text{ H}_2 \rightarrow 2 \text{ H}_2\text{O} + \text{O}=\text{CC}(=\text{O})\text{O} + \text{C}=\text{O}$                      |
| 64_160_1  | 9     | 0     | -97.1  | 36.1  | $2 \text{ CO}_2 + 5 \text{ H}_2 \rightarrow 3 \text{ H}_2\text{O} + \text{CC}=\text{O}$                                                             |
| 64_166_15 | 11    | 0     | -91.9  | 39.5  | $4 \text{ CO}_2 + 6 \text{ H}_2 \rightarrow 3 \text{ H}_2\text{O} + \text{CC}=\text{O} + \text{OC}(=\text{O})\text{C}(=\text{O})\text{O}$           |
| 64_166_16 | 11    | 0     | -110.8 | 39.5  | $4 \text{ CO}_2 + 7 \text{ H}_2 \rightarrow 4 \text{ H}_2\text{O} + \text{O}=\text{CC}(=\text{O})\text{O} + \text{CC}=\text{O}$                     |
| 64_166_17 | 11    | 0     | -91.9  | 39.5  | $4 \text{ CO}_2 + 6 \text{ H}_2 \rightarrow 3 \text{ H}_2\text{O} + \text{CC}=\text{O} + \text{OC}(=\text{O})\text{C}(=\text{O})\text{O}$           |
| 64_166_18 | 11    | 0     | -110.8 | 39.5  | $4 \text{ CO}_2 + 7 \text{ H}_2 \rightarrow 4 \text{ H}_2\text{O} + \text{O}=\text{CC}(=\text{O})\text{O} + \text{CC}=\text{O}$                     |
| 64_166_19 | 11    | 0     | -91.9  | 39.5  | $4 \text{ CO}_2 + 6 \text{ H}_2 \rightarrow 3 \text{ H}_2\text{O} + \text{CC}=\text{O} + \text{OC}(=\text{O})\text{C}(=\text{O})\text{O}$           |
| 64_166_20 | 11    | 0     | -110.8 | 39.5  | $4 \text{ CO}_2 + 7 \text{ H}_2 \rightarrow 4 \text{ H}_2\text{O} + \text{O}=\text{CC}(=\text{O})\text{O} + \text{CC}=\text{O}$                     |
| 64_166_21 | 11    | 0     | -91.9  | 39.5  | $4 \text{ CO}_2 + 6 \text{ H}_2 \rightarrow 3 \text{ H}_2\text{O} + \text{CC}=\text{O} + \text{OC}(=\text{O})\text{C}(=\text{O})\text{O}$           |
| 64_166_22 | 11    | 1     | -110.8 | 39.5  | $4 \text{ CO}_2 + 7 \text{ H}_2 \rightarrow \text{O}=\text{CC}(=\text{O})\text{O} + 4 \text{ H}_2\text{O} + \text{CC}=\text{O}$                     |
| 64_166_23 | 11    | 0     | -91.9  | 39.5  | $4 \text{ CO}_2 + 6 \text{ H}_2 \rightarrow 3 \text{ H}_2\text{O} + \text{CC}=\text{O} + \text{OC}(=\text{O})\text{C}(=\text{O})\text{O}$           |
| 64_166_24 | 11    | 1     | -110.8 | 39.5  | $4 \text{ CO}_2 + 7 \text{ H}_2 \rightarrow \text{O}=\text{CC}(=\text{O})\text{O} + 4 \text{ H}_2\text{O} + \text{CC}=\text{O}$                     |
| 64_166_25 | 11    | 1     | -77.3  | 39.5  | $4 \text{ CO}_2 + 5 \text{ H}_2 \rightarrow \text{CC}(=\text{O})\text{O} + 2 \text{ H}_2\text{O} + \text{OC}(=\text{O})\text{C}(=\text{O})\text{O}$ |
| 64_166_26 | 10    | 1     | -101.4 | 39.5  | $4 \text{ CO}_2 + 6 \text{ H}_2 \rightarrow \text{OC}(=\text{O})\text{CC}(\text{C}(=\text{O})\text{O})\text{O} + 3 \text{ H}_2\text{O}$             |
| 64_166_27 | 11    | 1     | -77.3  | 39.5  | $4 \text{ CO}_2 + 5 \text{ H}_2 \rightarrow \text{CC}(=\text{O})\text{O} + 2 \text{ H}_2\text{O} + \text{OC}(=\text{O})\text{C}(=\text{O})\text{O}$ |
| 64_166_28 | 10    | 1     | -101.4 | 39.5  | $4 \text{ CO}_2 + 6 \text{ H}_2 \rightarrow \text{OC}(=\text{O})\text{CC}(\text{C}(=\text{O})\text{O})\text{O} + 3 \text{ H}_2\text{O}$             |
| 64_166_29 | 11    | 1     | -77.3  | 39.5  | $4 \text{ CO}_2 + 5 \text{ H}_2 \rightarrow \text{CC}(=\text{O})\text{O} + 2 \text{ H}_2\text{O} + \text{OC}(=\text{O})\text{C}(=\text{O})\text{O}$ |
| 64_166_30 | 11    | 2     | -96.2  | 39.5  | $4 \text{ CO}_2 + 6 \text{ H}_2 \rightarrow \text{CC}(=\text{O})\text{O} + \text{O}=\text{CC}(=\text{O})\text{O} + 3 \text{ H}_2\text{O}$           |

| Label     | $n_M$ | $n_B$ | $E_C$  | $E_H$ | Net reaction                                                                                                                                        |
|-----------|-------|-------|--------|-------|-----------------------------------------------------------------------------------------------------------------------------------------------------|
| 64.166.31 | 11    | 0     | -18.3  | 44.4  | $3 \text{ CO}_2 + 3 \text{ H}_2 \rightarrow \text{H}_2\text{O} + \text{C}=\text{O} + \text{OC}(=\text{O})\text{C}(=\text{O})\text{O}$               |
| 64.166.32 | 11    | 0     | -37.2  | 44.4  | $3 \text{ CO}_2 + 4 \text{ H}_2 \rightarrow 2 \text{ H}_2\text{O} + \text{O}=\text{CC}(=\text{O})\text{O} + \text{C}=\text{O}$                      |
| 64.171.2  | 7     | 0     | -23.4  | 28.5  | $\text{CO}_2 + 2 \text{ H}_2 \rightarrow \text{H}_2\text{O} + \text{C}=\text{O}$                                                                    |
| 64.173.1  | 6     | 0     | -13.8  | 41.1  | $2 \text{ CO}_2 + 2 \text{ H}_2 \rightarrow \text{H}_2\text{O} + \text{O}=\text{CC}(=\text{O})\text{O}$                                             |
| 64.175.1  | 5     | 0     | 0.7    | 45.3  | $3 \text{ CO}_2 + 2 \text{ H}_2 \rightarrow \text{H}_2\text{O} + \text{O}=\text{C}(\text{C}(=\text{O})\text{O})\text{C}(=\text{O})\text{O}$         |
| 64.175.2  | 5     | 0     | 0.7    | 45.3  | $3 \text{ CO}_2 + 2 \text{ H}_2 \rightarrow \text{H}_2\text{O} + \text{O}=\text{C}(\text{C}(=\text{O})\text{O})\text{C}(=\text{O})\text{O}$         |
| 64.177.1  | 11    | 1     | -77.3  | 50.8  | $4 \text{ CO}_2 + 5 \text{ H}_2 \rightarrow \text{CC}(=\text{O})\text{O} + 2 \text{ H}_2\text{O} + \text{OC}(=\text{O})\text{C}(=\text{O})\text{O}$ |
| 64.177.2  | 10    | 1     | -96.2  | 50.8  | $4 \text{ CO}_2 + 6 \text{ H}_2 \rightarrow \text{CC}(=\text{O})\text{O} + 3 \text{ H}_2\text{O} + \text{O}=\text{CC}(=\text{O})\text{O}$           |
| 64.177.3  | 11    | 1     | -77.3  | 50.8  | $4 \text{ CO}_2 + 5 \text{ H}_2 \rightarrow \text{CC}(=\text{O})\text{O} + 2 \text{ H}_2\text{O} + \text{OC}(=\text{O})\text{C}(=\text{O})\text{O}$ |
| 64.177.4  | 10    | 1     | -96.2  | 50.8  | $4 \text{ CO}_2 + 6 \text{ H}_2 \rightarrow \text{CC}(=\text{O})\text{O} + 3 \text{ H}_2\text{O} + \text{O}=\text{CC}(=\text{O})\text{O}$           |
| 64.177.5  | 11    | 0     | -91.9  | 45.1  | $4 \text{ CO}_2 + 6 \text{ H}_2 \rightarrow 3 \text{ H}_2\text{O} + \text{CC}=\text{O} + \text{OC}(=\text{O})\text{C}(=\text{O})\text{O}$           |
| 64.177.6  | 11    | 1     | -110.8 | 45.1  | $4 \text{ CO}_2 + 7 \text{ H}_2 \rightarrow \text{O}=\text{CC}(=\text{O})\text{O} + 4 \text{ H}_2\text{O} + \text{CC}=\text{O}$                     |
| 64.177.7  | 11    | 0     | -91.9  | 45.1  | $4 \text{ CO}_2 + 6 \text{ H}_2 \rightarrow 3 \text{ H}_2\text{O} + \text{CC}=\text{O} + \text{OC}(=\text{O})\text{C}(=\text{O})\text{O}$           |
| 64.177.8  | 11    | 1     | -110.8 | 45.1  | $4 \text{ CO}_2 + 7 \text{ H}_2 \rightarrow \text{O}=\text{CC}(=\text{O})\text{O} + 4 \text{ H}_2\text{O} + \text{CC}=\text{O}$                     |
| 64.177.9  | 11    | 1     | -77.3  | 45.1  | $4 \text{ CO}_2 + 5 \text{ H}_2 \rightarrow \text{CC}(=\text{O})\text{O} + 2 \text{ H}_2\text{O} + \text{OC}(=\text{O})\text{C}(=\text{O})\text{O}$ |
| 64.177.10 | 10    | 1     | -101.4 | 45.1  | $4 \text{ CO}_2 + 6 \text{ H}_2 \rightarrow \text{OC}(=\text{O})\text{CC}(\text{C}(=\text{O})\text{O})\text{O} + 3 \text{ H}_2\text{O}$             |
| 64.177.11 | 11    | 1     | -77.3  | 45.1  | $4 \text{ CO}_2 + 5 \text{ H}_2 \rightarrow \text{CC}(=\text{O})\text{O} + 2 \text{ H}_2\text{O} + \text{OC}(=\text{O})\text{C}(=\text{O})\text{O}$ |
| 64.177.12 | 10    | 1     | -101.4 | 45.1  | $4 \text{ CO}_2 + 6 \text{ H}_2 \rightarrow \text{OC}(=\text{O})\text{CC}(\text{C}(=\text{O})\text{O})\text{O} + 3 \text{ H}_2\text{O}$             |



| Label     | $n_M$ | $n_B$ | $E_C$  | $E_H$ | Net reaction                                                                                                   |
|-----------|-------|-------|--------|-------|----------------------------------------------------------------------------------------------------------------|
| 64.177.13 | 11    | 1     | -77.3  | 45.1  | $4 \text{ CO}_2 + 5 \text{ H}_2 \rightarrow \text{CC(=O)O} + 2 \text{ H}_2\text{O} + \text{OC(=O)C(=O)O}$      |
| 64.177.14 | 11    | 2     | -96.2  | 45.1  | $4 \text{ CO}_2 + 6 \text{ H}_2 \rightarrow \text{CC(=O)O} + \text{O=CC(=O)O} + 3 \text{ H}_2\text{O}$         |
| 64.185.1  | 13    | 0     | -133.0 | 42.9  | $4 \text{ CO}_2 + 8 \text{ H}_2 \rightarrow 4 \text{ H}_2\text{O} + \text{C=O} + \text{CC=O} + \text{OC=O}$    |
| 64.185.2  | 13    | 0     | -133.0 | 41.3  | $4 \text{ CO}_2 + 8 \text{ H}_2 \rightarrow 4 \text{ H}_2\text{O} + \text{C=O} + \text{CC=O} + \text{OC=O}$    |
| 64.185.3  | 13    | 0     | -133.0 | 40.6  | $4 \text{ CO}_2 + 8 \text{ H}_2 \rightarrow 4 \text{ H}_2\text{O} + \text{C=O} + \text{CC=O} + \text{OC=O}$    |
| 64.185.4  | 13    | 0     | -122.2 | 42.9  | $4 \text{ CO}_2 + 7 \text{ H}_2 \rightarrow 3 \text{ H}_2\text{O} + 2 \text{ OC=O} + \text{CC=O}$              |
| 64.185.5  | 13    | 0     | -122.2 | 41.3  | $4 \text{ CO}_2 + 7 \text{ H}_2 \rightarrow 3 \text{ H}_2\text{O} + 2 \text{ OC=O} + \text{CC=O}$              |
| 64.185.6  | 13    | 0     | -122.2 | 40.6  | $4 \text{ CO}_2 + 7 \text{ H}_2 \rightarrow 3 \text{ H}_2\text{O} + 2 \text{ OC=O} + \text{CC=O}$              |
| 64.185.7  | 13    | 1     | -118.4 | 50.6  | $4 \text{ CO}_2 + 7 \text{ H}_2 \rightarrow \text{CC(=O)O} + 3 \text{ H}_2\text{O} + \text{C=O} + \text{OC=O}$ |
| 64.185.8  | 13    | 1     | -118.4 | 49.0  | $4 \text{ CO}_2 + 7 \text{ H}_2 \rightarrow \text{CC(=O)O} + 3 \text{ H}_2\text{O} + \text{C=O} + \text{OC=O}$ |
| 64.185.9  | 13    | 1     | -118.4 | 48.3  | $4 \text{ CO}_2 + 7 \text{ H}_2 \rightarrow \text{CC(=O)O} + 3 \text{ H}_2\text{O} + \text{C=O} + \text{OC=O}$ |
| 64.185.10 | 13    | 1     | -107.6 | 50.6  | $4 \text{ CO}_2 + 6 \text{ H}_2 \rightarrow \text{CC(=O)O} + 2 \text{ H}_2\text{O} + 2 \text{ OC=O}$           |
| 64.185.11 | 13    | 1     | -107.6 | 49.0  | $4 \text{ CO}_2 + 6 \text{ H}_2 \rightarrow \text{CC(=O)O} + 2 \text{ H}_2\text{O} + 2 \text{ OC=O}$           |
| 64.185.12 | 13    | 1     | -107.6 | 48.3  | $4 \text{ CO}_2 + 6 \text{ H}_2 \rightarrow \text{CC(=O)O} + 2 \text{ H}_2\text{O} + 2 \text{ OC=O}$           |
| 64.185.13 | 13    | 1     | -118.4 | 50.6  | $4 \text{ CO}_2 + 7 \text{ H}_2 \rightarrow \text{CC(=O)O} + 3 \text{ H}_2\text{O} + \text{C=O} + \text{OC=O}$ |
| 64.185.14 | 13    | 1     | -118.4 | 49.0  | $4 \text{ CO}_2 + 7 \text{ H}_2 \rightarrow \text{CC(=O)O} + 3 \text{ H}_2\text{O} + \text{C=O} + \text{OC=O}$ |
| 64.185.15 | 13    | 1     | -118.4 | 48.3  | $4 \text{ CO}_2 + 7 \text{ H}_2 \rightarrow \text{CC(=O)O} + 3 \text{ H}_2\text{O} + \text{C=O} + \text{OC=O}$ |
| 64.185.16 | 13    | 1     | -107.6 | 50.6  | $4 \text{ CO}_2 + 6 \text{ H}_2 \rightarrow \text{CC(=O)O} + 2 \text{ H}_2\text{O} + 2 \text{ OC=O}$           |

| Label     | $n_M$ | $n_B$ | $E_C$  | $E_H$ | Net reaction                                                                                                   |
|-----------|-------|-------|--------|-------|----------------------------------------------------------------------------------------------------------------|
| 64.185.17 | 13    | 1     | -107.6 | 49.0  | $4 \text{ CO}_2 + 6 \text{ H}_2 \rightarrow \text{CC(=O)O} + 2 \text{ H}_2\text{O} + 2 \text{ OC=O}$           |
| 64.185.18 | 13    | 1     | -107.6 | 48.3  | $4 \text{ CO}_2 + 6 \text{ H}_2 \rightarrow \text{CC(=O)O} + 2 \text{ H}_2\text{O} + 2 \text{ OC=O}$           |
| 64.185.19 | 12    | 0     | -133.0 | 43.7  | $4 \text{ CO}_2 + 8 \text{ H}_2 \rightarrow 4 \text{ H}_2\text{O} + \text{CC=O} + \text{C=O} + \text{OC=O}$    |
| 64.185.20 | 12    | 0     | -133.0 | 42.1  | $4 \text{ CO}_2 + 8 \text{ H}_2 \rightarrow 4 \text{ H}_2\text{O} + \text{CC=O} + \text{C=O} + \text{OC=O}$    |
| 64.185.21 | 12    | 0     | -133.0 | 41.4  | $4 \text{ CO}_2 + 8 \text{ H}_2 \rightarrow 4 \text{ H}_2\text{O} + \text{CC=O} + \text{C=O} + \text{OC=O}$    |
| 64.185.22 | 12    | 0     | -122.2 | 43.7  | $4 \text{ CO}_2 + 7 \text{ H}_2 \rightarrow 3 \text{ H}_2\text{O} + 2 \text{ OC=O} + \text{CC=O}$              |
| 64.185.23 | 12    | 0     | -122.2 | 42.1  | $4 \text{ CO}_2 + 7 \text{ H}_2 \rightarrow 3 \text{ H}_2\text{O} + 2 \text{ OC=O} + \text{CC=O}$              |
| 64.185.24 | 12    | 0     | -122.2 | 41.4  | $4 \text{ CO}_2 + 7 \text{ H}_2 \rightarrow 3 \text{ H}_2\text{O} + 2 \text{ OC=O} + \text{CC=O}$              |
| 64.185.25 | 12    | 0     | -133.0 | 43.7  | $4 \text{ CO}_2 + 8 \text{ H}_2 \rightarrow 4 \text{ H}_2\text{O} + \text{CC=O} + \text{C=O} + \text{OC=O}$    |
| 64.185.26 | 12    | 0     | -133.0 | 42.1  | $4 \text{ CO}_2 + 8 \text{ H}_2 \rightarrow 4 \text{ H}_2\text{O} + \text{CC=O} + \text{C=O} + \text{OC=O}$    |
| 64.185.27 | 12    | 0     | -133.0 | 41.4  | $4 \text{ CO}_2 + 8 \text{ H}_2 \rightarrow 4 \text{ H}_2\text{O} + \text{CC=O} + \text{C=O} + \text{OC=O}$    |
| 64.185.28 | 12    | 0     | -122.2 | 43.7  | $4 \text{ CO}_2 + 7 \text{ H}_2 \rightarrow 3 \text{ H}_2\text{O} + 2 \text{ OC=O} + \text{CC=O}$              |
| 64.185.29 | 12    | 0     | -122.2 | 42.1  | $4 \text{ CO}_2 + 7 \text{ H}_2 \rightarrow 3 \text{ H}_2\text{O} + 2 \text{ OC=O} + \text{CC=O}$              |
| 64.185.30 | 12    | 0     | -122.2 | 41.4  | $4 \text{ CO}_2 + 7 \text{ H}_2 \rightarrow 3 \text{ H}_2\text{O} + 2 \text{ OC=O} + \text{CC=O}$              |
| 64.185.31 | 12    | 1     | -118.4 | 43.7  | $4 \text{ CO}_2 + 7 \text{ H}_2 \rightarrow \text{CC(=O)O} + 3 \text{ H}_2\text{O} + \text{C=O} + \text{OC=O}$ |
| 64.185.32 | 12    | 1     | -118.4 | 42.1  | $4 \text{ CO}_2 + 7 \text{ H}_2 \rightarrow \text{CC(=O)O} + 3 \text{ H}_2\text{O} + \text{C=O} + \text{OC=O}$ |
| 64.185.33 | 12    | 1     | -118.4 | 41.4  | $4 \text{ CO}_2 + 7 \text{ H}_2 \rightarrow \text{CC(=O)O} + 3 \text{ H}_2\text{O} + \text{C=O} + \text{OC=O}$ |
| 64.185.34 | 12    | 1     | -107.6 | 43.7  | $4 \text{ CO}_2 + 6 \text{ H}_2 \rightarrow \text{CC(=O)O} + 2 \text{ H}_2\text{O} + 2 \text{ OC=O}$           |

| Label     | $n_M$ | $n_B$ | $E_C$  | $E_H$ | Net reaction                                                                                                                                                               |
|-----------|-------|-------|--------|-------|----------------------------------------------------------------------------------------------------------------------------------------------------------------------------|
| 64.185.35 | 12    | 1     | -107.6 | 42.1  | $4 \text{ CO}_2 + 6 \text{ H}_2 \rightarrow \text{CC(=O)O} + 2 \text{ H}_2\text{O} + 2 \text{ OC=O}$                                                                       |
| 64.185.36 | 12    | 1     | -107.6 | 41.4  | $4 \text{ CO}_2 + 6 \text{ H}_2 \rightarrow \text{CC(=O)O} + 2 \text{ H}_2\text{O} + 2 \text{ OC=O}$                                                                       |
| 64.185.37 | 12    | 1     | -118.4 | 43.7  | $4 \text{ CO}_2 + 7 \text{ H}_2 \rightarrow \text{CC(=O)O} + 3 \text{ H}_2\text{O} + \text{C=O} + \text{OC=O}$                                                             |
| 64.185.38 | 12    | 1     | -118.4 | 42.1  | $4 \text{ CO}_2 + 7 \text{ H}_2 \rightarrow \text{CC(=O)O} + 3 \text{ H}_2\text{O} + \text{C=O} + \text{OC=O}$                                                             |
| 64.185.39 | 12    | 1     | -118.4 | 41.4  | $4 \text{ CO}_2 + 7 \text{ H}_2 \rightarrow \text{CC(=O)O} + 3 \text{ H}_2\text{O} + \text{C=O} + \text{OC=O}$                                                             |
| 64.185.40 | 12    | 1     | -107.6 | 43.7  | $4 \text{ CO}_2 + 6 \text{ H}_2 \rightarrow \text{CC(=O)O} + 2 \text{ H}_2\text{O} + 2 \text{ OC=O}$                                                                       |
| 64.185.41 | 12    | 1     | -107.6 | 42.1  | $4 \text{ CO}_2 + 6 \text{ H}_2 \rightarrow \text{CC(=O)O} + 2 \text{ H}_2\text{O} + 2 \text{ OC=O}$                                                                       |
| 64.185.42 | 12    | 1     | -107.6 | 41.4  | $4 \text{ CO}_2 + 6 \text{ H}_2 \rightarrow \text{CC(=O)O} + 2 \text{ H}_2\text{O} + 2 \text{ OC=O}$                                                                       |
| 64.185.43 | 12    | 2     | -118.4 | 43.7  | $4 \text{ CO}_2 + 7 \text{ H}_2 \rightarrow \text{CC(=O)O} + \text{OC=O} + 3 \text{ H}_2\text{O} + \text{C=O}$                                                             |
| 64.185.44 | 12    | 2     | -118.4 | 42.1  | $4 \text{ CO}_2 + 7 \text{ H}_2 \rightarrow \text{CC(=O)O} + \text{OC=O} + 3 \text{ H}_2\text{O} + \text{C=O}$                                                             |
| 64.185.45 | 12    | 2     | -118.4 | 41.4  | $4 \text{ CO}_2 + 7 \text{ H}_2 \rightarrow \text{CC(=O)O} + \text{OC=O} + 3 \text{ H}_2\text{O} + \text{C=O}$                                                             |
| 64.185.46 | 11    | 2     | -96.6  | 43.7  | $4 \text{ CO}_2 + 6 \text{ H}_2 \rightarrow \text{OC=O} + 2 \text{ H}_2\text{O} + \text{OC(CC(=O)O)O}$                                                                     |
| 64.185.47 | 11    | 2     | -96.6  | 42.1  | $4 \text{ CO}_2 + 6 \text{ H}_2 \rightarrow \text{OC=O} + 2 \text{ H}_2\text{O} + \text{OC(CC(=O)O)O}$                                                                     |
| 64.185.48 | 11    | 2     | -96.6  | 41.4  | $4 \text{ CO}_2 + 6 \text{ H}_2 \rightarrow \text{OC=O} + 2 \text{ H}_2\text{O} + \text{OC(CC(=O)O)O}$                                                                     |
| 64.190.3  | 6     | 0     | -3.7   | 41.4  | $4 \text{ CO}_2 + 3 \text{ H}_2 + \text{OC(=O)CC(C(=O)O)O} \rightarrow$<br>$\rightarrow \text{OC(=O)CC(=O)C(=O)O} + 2 \text{ H}_2\text{O} + 2 \text{ H}_2\text{O=CC(=O)O}$ |
| 64.190.4  | 6     | 0     | -3.7   | 41.4  | $4 \text{ CO}_2 + 3 \text{ H}_2 + \text{OC(=O)CC(C(=O)O)O} \rightarrow$<br>$\rightarrow \text{OC(=O)CC(=O)C(=O)O} + 2 \text{ H}_2\text{O} + 2 \text{ H}_2\text{O=CC(=O)O}$ |

| Label     | $n_M$ | $n_B$ | $E_C$ | $E_H$ | Net reaction                                                                                                                              |
|-----------|-------|-------|-------|-------|-------------------------------------------------------------------------------------------------------------------------------------------|
| 64.198.1  | 10    | 0     | -44.9 | 28.2  | $4 \text{ CO}_2 + 5 \text{ H}_2 \rightarrow 3 \text{ H}_2\text{O} + \text{O}=\text{CC}(=\text{O})\text{O} + \text{O}=\text{CC}=\text{O}$  |
| 64.198.2  | 10    | 0     | -44.9 | 32.4  | $4 \text{ CO}_2 + 5 \text{ H}_2 \rightarrow 3 \text{ H}_2\text{O} + \text{O}=\text{CC}(=\text{O})\text{O} + \text{O}=\text{CC}=\text{O}$  |
| 64.215.1  | 9     | 0     | -97.1 | 35.7  | $2 \text{ CO}_2 + 5 \text{ H}_2 \rightarrow 3 \text{ H}_2\text{O} + \text{CC}=\text{O}$                                                   |
| 64.220.1  | 9     | 0     | -23.4 | 46.8  | $\text{CO}_2 + 2 \text{ H}_2 \rightarrow \text{H}_2\text{O} + \text{C}=\text{O}$                                                          |
| 64.228.1  | 9     | 0     | -58.0 | 34.6  | $2 \text{ CO}_2 + 4 \text{ H}_2 \rightarrow 2 \text{ H}_2\text{O} + \text{OCC}=\text{O}$                                                  |
| 64.228.2  | 9     | 0     | -97.1 | 34.6  | $2 \text{ CO}_2 + 5 \text{ H}_2 \rightarrow 3 \text{ H}_2\text{O} + \text{CC}=\text{O}$                                                   |
| 64.228.4  | 9     | 0     | -58.0 | 30.3  | $2 \text{ CO}_2 + 4 \text{ H}_2 \rightarrow 2 \text{ H}_2\text{O} + \text{OCC}=\text{O}$                                                  |
| 64.228.5  | 9     | 0     | -97.1 | 34.6  | $2 \text{ CO}_2 + 5 \text{ H}_2 \rightarrow 3 \text{ H}_2\text{O} + \text{CC}=\text{O}$                                                   |
| 64.228.7  | 9     | 0     | -58.0 | 30.9  | $2 \text{ CO}_2 + 4 \text{ H}_2 \rightarrow 2 \text{ H}_2\text{O} + \text{OCC}=\text{O}$                                                  |
| 64.228.8  | 9     | 0     | -97.1 | 34.6  | $2 \text{ CO}_2 + 5 \text{ H}_2 \rightarrow 3 \text{ H}_2\text{O} + \text{CC}=\text{O}$                                                   |
| 64.235.6  | 7     | 0     | -23.4 | 35.2  | $\text{CO}_2 + 2 \text{ H}_2 \rightarrow \text{H}_2\text{O} + \text{C}=\text{O}$                                                          |
| 64.237.10 | 9     | 0     | -37.2 | 42.3  | $3 \text{ CO}_2 + 4 \text{ H}_2 \rightarrow 2 \text{ H}_2\text{O} + \text{O}=\text{CC}(=\text{O})\text{O} + \text{C}=\text{O}$            |
| 64.237.11 | 9     | 0     | -37.2 | 42.3  | $3 \text{ CO}_2 + 4 \text{ H}_2 \rightarrow 2 \text{ H}_2\text{O} + \text{C}=\text{O} + \text{O}=\text{CC}(=\text{O})\text{O}$            |
| 64.237.12 | 9     | 0     | -37.2 | 42.3  | $3 \text{ CO}_2 + 4 \text{ H}_2 \rightarrow 2 \text{ H}_2\text{O} + \text{C}=\text{O} + \text{O}=\text{CC}(=\text{O})\text{O}$            |
| 64.237.13 | 9     | 0     | -37.2 | 34.2  | $3 \text{ CO}_2 + 4 \text{ H}_2 \rightarrow 2 \text{ H}_2\text{O} + \text{O}=\text{CC}(=\text{O})\text{O} + \text{C}=\text{O}$            |
| 64.237.14 | 9     | 0     | -37.2 | 34.2  | $3 \text{ CO}_2 + 4 \text{ H}_2 \rightarrow 2 \text{ H}_2\text{O} + \text{C}=\text{O} + \text{O}=\text{CC}(=\text{O})\text{O}$            |
| 64.237.15 | 8     | 0     | -37.2 | 34.2  | $3 \text{ CO}_2 + 4 \text{ H}_2 \rightarrow 2 \text{ H}_2\text{O} + \text{C}=\text{O} + \text{O}=\text{CC}(=\text{O})\text{O}$            |
| 64.239.2  | 11    | 1     | -96.2 | 54.4  | $4 \text{ CO}_2 + 6 \text{ H}_2 \rightarrow \text{CC}(=\text{O})\text{O} + 3 \text{ H}_2\text{O} + \text{O}=\text{CC}(=\text{O})\text{O}$ |

| Label     | $n_M$ | $n_B$ | $E_C$  | $E_H$ | Net reaction                                                                                                                                                                                                                                                                        |
|-----------|-------|-------|--------|-------|-------------------------------------------------------------------------------------------------------------------------------------------------------------------------------------------------------------------------------------------------------------------------------------|
| 64_239_4  | 11    | 1     | -96.2  | 54.4  | $4 \text{ CO}_2 + 6 \text{ H}_2 \rightarrow \text{CC}(=\text{O})\text{O} + 3 \text{ H}_2\text{O} + \text{O}=\text{CC}(=\text{O})\text{O}$                                                                                                                                           |
| 64_241_5  | 6     | 0     | -3.7   | 41.1  | $4 \text{ CO}_2 + 3 \text{ H}_2 + \text{OC}(=\text{O})\text{CC}(\text{C}(=\text{O})\text{O})\text{O} \rightarrow$<br>$\rightarrow \text{OC}(=\text{O})\text{CC}(=\text{O})\text{C}(=\text{O})\text{O} + 2 \text{ H}_2\text{O} + 2 \text{ H}_2\text{O}=\text{CC}(=\text{O})\text{O}$ |
| 64_241_6  | 6     | 0     | -3.7   | 41.1  | $4 \text{ CO}_2 + 3 \text{ H}_2 + \text{OC}(=\text{O})\text{CC}(\text{C}(=\text{O})\text{O})\text{O} \rightarrow$<br>$\rightarrow \text{OC}(=\text{O})\text{CC}(=\text{O})\text{C}(=\text{O})\text{O} + 2 \text{ H}_2\text{O} + 2 \text{ H}_2\text{O}=\text{CC}(=\text{O})\text{O}$ |
| 64_243_1  | 11    | 1     | -77.3  | 50.8  | $4 \text{ CO}_2 + 5 \text{ H}_2 \rightarrow \text{CC}(=\text{O})\text{O} + 2 \text{ H}_2\text{O} + \text{OC}(=\text{O})\text{C}(=\text{O})\text{O}$                                                                                                                                 |
| 64_243_2  | 10    | 1     | -96.2  | 50.8  | $4 \text{ CO}_2 + 6 \text{ H}_2 \rightarrow \text{CC}(=\text{O})\text{O} + 3 \text{ H}_2\text{O} + \text{O}=\text{CC}(=\text{O})\text{O}$                                                                                                                                           |
| 64_243_3  | 11    | 1     | -77.3  | 50.8  | $4 \text{ CO}_2 + 5 \text{ H}_2 \rightarrow \text{CC}(=\text{O})\text{O} + 2 \text{ H}_2\text{O} + \text{OC}(=\text{O})\text{C}(=\text{O})\text{O}$                                                                                                                                 |
| 64_243_4  | 10    | 1     | -96.2  | 50.8  | $4 \text{ CO}_2 + 6 \text{ H}_2 \rightarrow \text{CC}(=\text{O})\text{O} + 3 \text{ H}_2\text{O} + \text{O}=\text{CC}(=\text{O})\text{O}$                                                                                                                                           |
| 64_243_33 | 11    | 0     | -91.9  | 45.4  | $4 \text{ CO}_2 + 6 \text{ H}_2 \rightarrow 3 \text{ H}_2\text{O} + \text{CC}=\text{O} + \text{OC}(=\text{O})\text{C}(=\text{O})\text{O}$                                                                                                                                           |
| 64_243_34 | 11    | 1     | -110.8 | 45.4  | $4 \text{ CO}_2 + 7 \text{ H}_2 \rightarrow \text{O}=\text{CC}(=\text{O})\text{O} + 4 \text{ H}_2\text{O} + \text{CC}=\text{O}$                                                                                                                                                     |
| 64_243_35 | 11    | 0     | -91.9  | 45.4  | $4 \text{ CO}_2 + 6 \text{ H}_2 \rightarrow 3 \text{ H}_2\text{O} + \text{CC}=\text{O} + \text{OC}(=\text{O})\text{C}(=\text{O})\text{O}$                                                                                                                                           |
| 64_243_36 | 11    | 1     | -110.8 | 45.4  | $4 \text{ CO}_2 + 7 \text{ H}_2 \rightarrow \text{O}=\text{CC}(=\text{O})\text{O} + 4 \text{ H}_2\text{O} + \text{CC}=\text{O}$                                                                                                                                                     |
| 64_243_37 | 11    | 1     | -77.3  | 45.4  | $4 \text{ CO}_2 + 5 \text{ H}_2 \rightarrow \text{CC}(=\text{O})\text{O} + 2 \text{ H}_2\text{O} + \text{OC}(=\text{O})\text{C}(=\text{O})\text{O}$                                                                                                                                 |
| 64_243_38 | 10    | 1     | -101.4 | 45.4  | $4 \text{ CO}_2 + 6 \text{ H}_2 \rightarrow \text{OC}(=\text{O})\text{CC}(\text{C}(=\text{O})\text{O})\text{O} + 3 \text{ H}_2\text{O}$                                                                                                                                             |
| 64_243_39 | 11    | 1     | -77.3  | 45.4  | $4 \text{ CO}_2 + 5 \text{ H}_2 \rightarrow \text{CC}(=\text{O})\text{O} + 2 \text{ H}_2\text{O} + \text{OC}(=\text{O})\text{C}(=\text{O})\text{O}$                                                                                                                                 |
| 64_243_40 | 10    | 1     | -101.4 | 45.4  | $4 \text{ CO}_2 + 6 \text{ H}_2 \rightarrow \text{OC}(=\text{O})\text{CC}(\text{C}(=\text{O})\text{O})\text{O} + 3 \text{ H}_2\text{O}$                                                                                                                                             |
| 64_243_41 | 11    | 1     | -77.3  | 45.4  | $4 \text{ CO}_2 + 5 \text{ H}_2 \rightarrow \text{CC}(=\text{O})\text{O} + 2 \text{ H}_2\text{O} + \text{OC}(=\text{O})\text{C}(=\text{O})\text{O}$                                                                                                                                 |

| Label     | $n_M$ | $n_B$ | $E_C$  | $E_H$ | Net reaction                                                                                                                                        |
|-----------|-------|-------|--------|-------|-----------------------------------------------------------------------------------------------------------------------------------------------------|
| 64_243_42 | 11    | 2     | -96.2  | 45.4  | $4 \text{ CO}_2 + 6 \text{ H}_2 \rightarrow \text{CC}(=\text{O})\text{O} + \text{O}=\text{CC}(=\text{O})\text{O} + 3 \text{ H}_2\text{O}$           |
| 64_243_43 | 11    | 0     | -91.9  | 45.4  | $4 \text{ CO}_2 + 6 \text{ H}_2 \rightarrow 3 \text{ H}_2\text{O} + \text{CC}=\text{O} + \text{OC}(=\text{O})\text{C}(=\text{O})\text{O}$           |
| 64_243_44 | 11    | 0     | -110.8 | 45.4  | $4 \text{ CO}_2 + 7 \text{ H}_2 \rightarrow 4 \text{ H}_2\text{O} + \text{O}=\text{CC}(=\text{O})\text{O} + \text{CC}=\text{O}$                     |
| 64_243_45 | 11    | 0     | -91.9  | 45.4  | $4 \text{ CO}_2 + 6 \text{ H}_2 \rightarrow 3 \text{ H}_2\text{O} + \text{CC}=\text{O} + \text{OC}(=\text{O})\text{C}(=\text{O})\text{O}$           |
| 64_243_46 | 11    | 0     | -110.8 | 45.4  | $4 \text{ CO}_2 + 7 \text{ H}_2 \rightarrow 4 \text{ H}_2\text{O} + \text{O}=\text{CC}(=\text{O})\text{O} + \text{CC}=\text{O}$                     |
| 64_243_47 | 11    | 0     | -91.9  | 45.4  | $4 \text{ CO}_2 + 6 \text{ H}_2 \rightarrow 3 \text{ H}_2\text{O} + \text{CC}=\text{O} + \text{OC}(=\text{O})\text{C}(=\text{O})\text{O}$           |
| 64_243_48 | 11    | 0     | -110.8 | 45.4  | $4 \text{ CO}_2 + 7 \text{ H}_2 \rightarrow 4 \text{ H}_2\text{O} + \text{O}=\text{CC}(=\text{O})\text{O} + \text{CC}=\text{O}$                     |
| 64_243_49 | 11    | 0     | -91.9  | 45.4  | $4 \text{ CO}_2 + 6 \text{ H}_2 \rightarrow 3 \text{ H}_2\text{O} + \text{CC}=\text{O} + \text{OC}(=\text{O})\text{C}(=\text{O})\text{O}$           |
| 64_243_50 | 11    | 1     | -110.8 | 45.4  | $4 \text{ CO}_2 + 7 \text{ H}_2 \rightarrow \text{O}=\text{CC}(=\text{O})\text{O} + 4 \text{ H}_2\text{O} + \text{CC}=\text{O}$                     |
| 64_243_51 | 11    | 0     | -91.9  | 45.4  | $4 \text{ CO}_2 + 6 \text{ H}_2 \rightarrow 3 \text{ H}_2\text{O} + \text{CC}=\text{O} + \text{OC}(=\text{O})\text{C}(=\text{O})\text{O}$           |
| 64_243_52 | 11    | 1     | -110.8 | 45.4  | $4 \text{ CO}_2 + 7 \text{ H}_2 \rightarrow \text{O}=\text{CC}(=\text{O})\text{O} + 4 \text{ H}_2\text{O} + \text{CC}=\text{O}$                     |
| 64_243_53 | 11    | 1     | -77.3  | 45.4  | $4 \text{ CO}_2 + 5 \text{ H}_2 \rightarrow \text{CC}(=\text{O})\text{O} + 2 \text{ H}_2\text{O} + \text{OC}(=\text{O})\text{C}(=\text{O})\text{O}$ |
| 64_243_54 | 10    | 1     | -101.4 | 45.4  | $4 \text{ CO}_2 + 6 \text{ H}_2 \rightarrow \text{OC}(=\text{O})\text{CC}(\text{C}(=\text{O})\text{O})\text{O} + 3 \text{ H}_2\text{O}$             |
| 64_243_55 | 11    | 1     | -77.3  | 45.4  | $4 \text{ CO}_2 + 5 \text{ H}_2 \rightarrow \text{CC}(=\text{O})\text{O} + 2 \text{ H}_2\text{O} + \text{OC}(=\text{O})\text{C}(=\text{O})\text{O}$ |
| 64_243_56 | 10    | 1     | -101.4 | 45.4  | $4 \text{ CO}_2 + 6 \text{ H}_2 \rightarrow \text{OC}(=\text{O})\text{CC}(\text{C}(=\text{O})\text{O})\text{O} + 3 \text{ H}_2\text{O}$             |
| 64_243_57 | 11    | 1     | -77.3  | 45.4  | $4 \text{ CO}_2 + 5 \text{ H}_2 \rightarrow \text{CC}(=\text{O})\text{O} + 2 \text{ H}_2\text{O} + \text{OC}(=\text{O})\text{C}(=\text{O})\text{O}$ |
| 64_243_58 | 11    | 2     | -96.2  | 45.4  | $4 \text{ CO}_2 + 6 \text{ H}_2 \rightarrow \text{CC}(=\text{O})\text{O} + \text{O}=\text{CC}(=\text{O})\text{O} + 3 \text{ H}_2\text{O}$           |
| 64_243_59 | 11    | 0     | -18.3  | 45.4  | $3 \text{ CO}_2 + 3 \text{ H}_2 \rightarrow \text{H}_2\text{O} + \text{C}=\text{O} + \text{OC}(=\text{O})\text{C}(=\text{O})\text{O}$               |

| Label     | $n_M$ | $n_B$ | $E_C$  | $E_H$ | Net reaction                                                                                                                                                      |
|-----------|-------|-------|--------|-------|-------------------------------------------------------------------------------------------------------------------------------------------------------------------|
| 64.243.60 | 11    | 0     | -37.2  | 45.4  | $3 \text{ CO}_2 + 4 \text{ H}_2 \rightarrow 2 \text{ H}_2\text{O} + \text{O}=\text{CC}(=\text{O})\text{O} + \text{C}=\text{O}$                                    |
| 64.255.1  | 10    | 0     | -90.3  | 36.4  | $3 \text{ CO}_2 + 5 \text{ H}_2 \rightarrow 3 \text{ H}_2\text{O} + \text{O}=\text{CCC}(=\text{O})\text{O}$                                                       |
| 64.255.2  | 10    | 0     | -90.3  | 41.2  | $3 \text{ CO}_2 + 5 \text{ H}_2 \rightarrow 3 \text{ H}_2\text{O} + \text{O}=\text{CCC}(=\text{O})\text{O}$                                                       |
| 64.267.4  | 9     | 0     | -58.0  | 30.9  | $2 \text{ CO}_2 + 4 \text{ H}_2 \rightarrow 2 \text{ H}_2\text{O} + \text{OCC}=\text{O}$                                                                          |
| 64.267.5  | 9     | 0     | -58.0  | 32.0  | $2 \text{ CO}_2 + 4 \text{ H}_2 \rightarrow 2 \text{ H}_2\text{O} + \text{OCC}=\text{O}$                                                                          |
| 64.282.1  | 6     | 0     | -3.3   | 45.3  | $4 \text{ CO}_2 + 3 \text{ H}_2 \rightarrow 2 \text{ H}_2\text{O} + \text{O}=\text{C}(\text{C}(=\text{O})\text{C}(=\text{O})\text{O})\text{C}(=\text{O})\text{O}$ |
| 64.282.2  | 6     | 0     | -3.3   | 45.3  | $4 \text{ CO}_2 + 3 \text{ H}_2 \rightarrow 2 \text{ H}_2\text{O} + \text{O}=\text{C}(\text{C}(=\text{O})\text{C}(=\text{O})\text{O})\text{C}(=\text{O})\text{O}$ |
| 64.322.1  | 11    | 0     | -109.6 | 41.1  | $3 \text{ CO}_2 + 6 \text{ H}_2 \rightarrow 3 \text{ H}_2\text{O} + \text{CC}=\text{O} + \text{OC}=\text{O}$                                                      |
| 64.322.2  | 12    | 0     | -109.6 | 48.8  | $3 \text{ CO}_2 + 6 \text{ H}_2 \rightarrow 3 \text{ H}_2\text{O} + \text{CC}=\text{O} + \text{OC}=\text{O}$                                                      |
| 64.322.3  | 12    | 0     | -109.6 | 40.7  | $3 \text{ CO}_2 + 6 \text{ H}_2 \rightarrow 3 \text{ H}_2\text{O} + \text{CC}=\text{O} + \text{OC}=\text{O}$                                                      |
| 64.338.1  | 7     | 0     | -30.7  | 45.3  | $4 \text{ CO}_2 + 4 \text{ H}_2 \rightarrow 2 \text{ H}_2\text{O} + \text{OC}(=\text{O})\text{C}(=\text{O})\text{C}(\text{C}(=\text{O})\text{O})\text{O}$         |
| 64.338.2  | 7     | 0     | -30.7  | 45.3  | $4 \text{ CO}_2 + 4 \text{ H}_2 \rightarrow 2 \text{ H}_2\text{O} + \text{OC}(=\text{O})\text{C}(=\text{O})\text{C}(\text{C}(=\text{O})\text{O})\text{O}$         |
| 64.387.2  | 11    | 0     | -97.1  | 46.9  | $2 \text{ CO}_2 + 5 \text{ H}_2 \rightarrow 3 \text{ H}_2\text{O} + \text{CC}=\text{O}$                                                                           |
| 64.387.4  | 11    | 0     | -97.1  | 46.9  | $2 \text{ CO}_2 + 5 \text{ H}_2 \rightarrow 3 \text{ H}_2\text{O} + \text{CC}=\text{O}$                                                                           |
| 64.387.6  | 11    | 0     | -97.1  | 46.9  | $2 \text{ CO}_2 + 5 \text{ H}_2 \rightarrow 3 \text{ H}_2\text{O} + \text{CC}=\text{O}$                                                                           |
| 64.387.8  | 11    | 0     | -97.1  | 46.9  | $2 \text{ CO}_2 + 5 \text{ H}_2 \rightarrow 3 \text{ H}_2\text{O} + \text{CC}=\text{O}$                                                                           |
| 64.387.10 | 11    | 0     | -97.1  | 46.9  | $2 \text{ CO}_2 + 5 \text{ H}_2 \rightarrow 3 \text{ H}_2\text{O} + \text{CC}=\text{O}$                                                                           |
| 64.387.12 | 11    | 0     | -97.1  | 46.9  | $2 \text{ CO}_2 + 5 \text{ H}_2 \rightarrow 3 \text{ H}_2\text{O} + \text{CC}=\text{O}$                                                                           |

| Label     | $n_M$ | $n_B$ | $E_C$  | $E_H$ | Net reaction                                                                                                                                                  |
|-----------|-------|-------|--------|-------|---------------------------------------------------------------------------------------------------------------------------------------------------------------|
| 64.387.14 | 11    | 0     | -97.1  | 47.7  | $2 \text{ CO}_2 + 5 \text{ H}_2 \rightarrow 3 \text{ H}_2\text{O} + \text{CC}=\text{O}$                                                                       |
| 64.387.16 | 11    | 0     | -97.1  | 47.7  | $2 \text{ CO}_2 + 5 \text{ H}_2 \rightarrow 3 \text{ H}_2\text{O} + \text{CC}=\text{O}$                                                                       |
| 64.387.18 | 11    | 0     | -97.1  | 47.7  | $2 \text{ CO}_2 + 5 \text{ H}_2 \rightarrow 3 \text{ H}_2\text{O} + \text{CC}=\text{O}$                                                                       |
| 64.387.20 | 11    | 0     | -97.1  | 48.4  | $2 \text{ CO}_2 + 5 \text{ H}_2 \rightarrow 3 \text{ H}_2\text{O} + \text{CC}=\text{O}$                                                                       |
| 64.400.1  | 13    | 1     | -110.8 | 40.6  | $4 \text{ CO}_2 + 7 \text{ H}_2 \rightarrow \text{CC}=\text{O} + 4 \text{ H}_2\text{O} + \text{O}=\text{CC}(=\text{O})\text{O}$                               |
| 64.400.2  | 13    | 1     | -110.8 | 40.6  | $4 \text{ CO}_2 + 7 \text{ H}_2 \rightarrow \text{CC}=\text{O} + 4 \text{ H}_2\text{O} + \text{O}=\text{CC}(=\text{O})\text{O}$                               |
| 64.407.1  | 15    | 1     | -133.9 | 50.8  | $5 \text{ CO}_2 + 9 \text{ H}_2 \rightarrow \text{CC}(=\text{O})\text{O} + 4 \text{ H}_2\text{O} + \text{C}=\text{O} + \text{O}=\text{CC}(\text{O})\text{O}$  |
| 64.407.2  | 15    | 1     | -123.0 | 50.8  | $5 \text{ CO}_2 + 8 \text{ H}_2 \rightarrow \text{CC}(=\text{O})\text{O} + 3 \text{ H}_2\text{O} + \text{OC}=\text{O} + \text{O}=\text{CC}(\text{O})\text{O}$ |
| 64.407.3  | 15    | 1     | -133.9 | 50.8  | $5 \text{ CO}_2 + 9 \text{ H}_2 \rightarrow \text{CC}(=\text{O})\text{O} + 4 \text{ H}_2\text{O} + \text{C}=\text{O} + \text{O}=\text{CC}(\text{O})\text{O}$  |
| 64.407.4  | 15    | 1     | -123.0 | 50.8  | $5 \text{ CO}_2 + 8 \text{ H}_2 \rightarrow \text{CC}(=\text{O})\text{O} + 3 \text{ H}_2\text{O} + \text{OC}=\text{O} + \text{O}=\text{CC}(\text{O})\text{O}$ |
| 64.407.5  | 15    | 1     | -133.9 | 50.8  | $5 \text{ CO}_2 + 9 \text{ H}_2 \rightarrow \text{CC}(=\text{O})\text{O} + 4 \text{ H}_2\text{O} + \text{C}=\text{O} + \text{O}=\text{CC}(\text{O})\text{O}$  |
| 64.407.6  | 15    | 1     | -123.0 | 50.8  | $5 \text{ CO}_2 + 8 \text{ H}_2 \rightarrow \text{CC}(=\text{O})\text{O} + 3 \text{ H}_2\text{O} + \text{OC}=\text{O} + \text{O}=\text{CC}(\text{O})\text{O}$ |
| 64.407.7  | 15    | 1     | -133.9 | 50.8  | $5 \text{ CO}_2 + 9 \text{ H}_2 \rightarrow \text{CC}(=\text{O})\text{O} + 4 \text{ H}_2\text{O} + \text{C}=\text{O} + \text{O}=\text{CC}(\text{O})\text{O}$  |
| 64.407.8  | 15    | 1     | -123.0 | 50.8  | $5 \text{ CO}_2 + 8 \text{ H}_2 \rightarrow \text{CC}(=\text{O})\text{O} + 3 \text{ H}_2\text{O} + \text{OC}=\text{O} + \text{O}=\text{CC}(\text{O})\text{O}$ |
| 64.407.9  | 15    | 0     | -148.5 | 45.1  | $5 \text{ CO}_2 + 10 \text{ H}_2 \rightarrow 5 \text{ H}_2\text{O} + \text{CC}=\text{O} + \text{C}=\text{O} + \text{O}=\text{CC}(\text{O})\text{O}$           |
| 64.407.10 | 15    | 0     | -137.6 | 45.1  | $5 \text{ CO}_2 + 9 \text{ H}_2 \rightarrow 4 \text{ H}_2\text{O} + \text{OC}=\text{O} + \text{CC}=\text{O} + \text{O}=\text{CC}(\text{O})\text{O}$           |
| 64.407.11 | 15    | 0     | -148.5 | 45.1  | $5 \text{ CO}_2 + 10 \text{ H}_2 \rightarrow 5 \text{ H}_2\text{O} + \text{CC}=\text{O} + \text{C}=\text{O} + \text{O}=\text{CC}(\text{O})\text{O}$           |
| 64.407.12 | 15    | 0     | -137.6 | 45.1  | $5 \text{ CO}_2 + 9 \text{ H}_2 \rightarrow 4 \text{ H}_2\text{O} + \text{OC}=\text{O} + \text{CC}=\text{O} + \text{O}=\text{CC}(\text{O})\text{O}$           |



| Label     | $n_M$ | $n_B$ | $E_C$  | $E_H$ | Net reaction                                                                                                        |
|-----------|-------|-------|--------|-------|---------------------------------------------------------------------------------------------------------------------|
| 64_407_13 | 15    | 1     | -133.9 | 45.1  | $5 \text{ CO}_2 + 9 \text{ H}_2 \rightarrow \text{CC(=O)O} + 4 \text{ H}_2\text{O} + \text{C=O} + \text{O=CC(O)O}$  |
| 64_407_14 | 15    | 1     | -123.0 | 45.1  | $5 \text{ CO}_2 + 8 \text{ H}_2 \rightarrow \text{CC(=O)O} + 3 \text{ H}_2\text{O} + \text{OC=O} + \text{O=CC(O)O}$ |
| 64_407_15 | 15    | 1     | -133.9 | 45.1  | $5 \text{ CO}_2 + 9 \text{ H}_2 \rightarrow \text{CC(=O)O} + 4 \text{ H}_2\text{O} + \text{C=O} + \text{O=CC(O)O}$  |
| 64_407_16 | 15    | 1     | -123.0 | 45.1  | $5 \text{ CO}_2 + 8 \text{ H}_2 \rightarrow \text{CC(=O)O} + 3 \text{ H}_2\text{O} + \text{OC=O} + \text{O=CC(O)O}$ |
| 64_407_17 | 15    | 1     | -133.9 | 45.1  | $5 \text{ CO}_2 + 9 \text{ H}_2 \rightarrow \text{CC(=O)O} + 4 \text{ H}_2\text{O} + \text{C=O} + \text{O=CC(O)O}$  |
| 64_407_18 | 14    | 1     | -112.1 | 45.1  | $5 \text{ CO}_2 + 8 \text{ H}_2 \rightarrow 3 \text{ H}_2\text{O} + \text{OC(CC(=O)O)O} + \text{O=CC(O)O}$          |
| 64_407_19 | 15    | 1     | -133.9 | 50.8  | $5 \text{ CO}_2 + 9 \text{ H}_2 \rightarrow \text{CC(=O)O} + 4 \text{ H}_2\text{O} + \text{C=O} + \text{O=CC(O)O}$  |
| 64_407_20 | 15    | 1     | -123.0 | 50.8  | $5 \text{ CO}_2 + 8 \text{ H}_2 \rightarrow \text{CC(=O)O} + 3 \text{ H}_2\text{O} + \text{OC=O} + \text{O=CC(O)O}$ |
| 64_407_21 | 15    | 1     | -133.9 | 50.8  | $5 \text{ CO}_2 + 9 \text{ H}_2 \rightarrow \text{CC(=O)O} + 4 \text{ H}_2\text{O} + \text{C=O} + \text{O=CC(O)O}$  |
| 64_407_22 | 15    | 1     | -123.0 | 50.8  | $5 \text{ CO}_2 + 8 \text{ H}_2 \rightarrow \text{CC(=O)O} + 3 \text{ H}_2\text{O} + \text{OC=O} + \text{O=CC(O)O}$ |
| 64_407_23 | 15    | 0     | -148.5 | 43.9  | $5 \text{ CO}_2 + 10 \text{ H}_2 \rightarrow 5 \text{ H}_2\text{O} + \text{CC=O} + \text{C=O} + \text{O=CC(O)O}$    |
| 64_407_24 | 15    | 0     | -137.6 | 43.9  | $5 \text{ CO}_2 + 9 \text{ H}_2 \rightarrow 4 \text{ H}_2\text{O} + \text{OC=O} + \text{CC=O} + \text{O=CC(O)O}$    |
| 64_407_25 | 15    | 0     | -148.5 | 43.9  | $5 \text{ CO}_2 + 10 \text{ H}_2 \rightarrow 5 \text{ H}_2\text{O} + \text{CC=O} + \text{C=O} + \text{O=CC(O)O}$    |
| 64_407_26 | 15    | 0     | -137.6 | 43.9  | $5 \text{ CO}_2 + 9 \text{ H}_2 \rightarrow 4 \text{ H}_2\text{O} + \text{OC=O} + \text{CC=O} + \text{O=CC(O)O}$    |
| 64_407_27 | 15    | 1     | -133.9 | 43.9  | $5 \text{ CO}_2 + 9 \text{ H}_2 \rightarrow \text{CC(=O)O} + 4 \text{ H}_2\text{O} + \text{C=O} + \text{O=CC(O)O}$  |
| 64_407_28 | 15    | 1     | -123.0 | 43.9  | $5 \text{ CO}_2 + 8 \text{ H}_2 \rightarrow \text{CC(=O)O} + 3 \text{ H}_2\text{O} + \text{OC=O} + \text{O=CC(O)O}$ |
| 64_407_29 | 15    | 1     | -133.9 | 43.9  | $5 \text{ CO}_2 + 9 \text{ H}_2 \rightarrow \text{CC(=O)O} + 4 \text{ H}_2\text{O} + \text{C=O} + \text{O=CC(O)O}$  |
| 64_407_30 | 15    | 1     | -123.0 | 43.9  | $5 \text{ CO}_2 + 8 \text{ H}_2 \rightarrow \text{CC(=O)O} + 3 \text{ H}_2\text{O} + \text{OC=O} + \text{O=CC(O)O}$ |

| Label     | $n_M$ | $n_B$ | $E_C$  | $E_H$ | Net reaction                                                                                                                                                               |
|-----------|-------|-------|--------|-------|----------------------------------------------------------------------------------------------------------------------------------------------------------------------------|
| 64_407_31 | 15    | 1     | -133.9 | 43.9  | $5 \text{ CO}_2 + 9 \text{ H}_2 \rightarrow \text{CC(=O)O} + 4 \text{ H}_2\text{O} + \text{C=O} + \text{O=CC(O)O}$                                                         |
| 64_407_32 | 14    | 1     | -112.1 | 43.9  | $5 \text{ CO}_2 + 8 \text{ H}_2 \rightarrow 3 \text{ H}_2\text{O} + \text{OC(CC(=O)O)O} + \text{O=CC(O)O}$                                                                 |
| 64_407_33 | 14    | 0     | -148.5 | 45.4  | $5 \text{ CO}_2 + 10 \text{ H}_2 \rightarrow 5 \text{ H}_2\text{O} + \text{CC=O} + \text{C=O} + \text{O=CC(O)O}$                                                           |
| 64_407_34 | 14    | 0     | -137.6 | 45.4  | $5 \text{ CO}_2 + 9 \text{ H}_2 \rightarrow 4 \text{ H}_2\text{O} + \text{OC=O} + \text{CC=O} + \text{O=CC(O)O}$                                                           |
| 64_407_35 | 14    | 0     | -148.5 | 45.4  | $5 \text{ CO}_2 + 10 \text{ H}_2 \rightarrow 5 \text{ H}_2\text{O} + \text{CC=O} + \text{C=O} + \text{O=CC(O)O}$                                                           |
| 64_407_36 | 14    | 0     | -137.6 | 45.4  | $5 \text{ CO}_2 + 9 \text{ H}_2 \rightarrow 4 \text{ H}_2\text{O} + \text{OC=O} + \text{CC=O} + \text{O=CC(O)O}$                                                           |
| 64_407_37 | 14    | 1     | -133.9 | 45.4  | $5 \text{ CO}_2 + 9 \text{ H}_2 \rightarrow \text{CC(=O)O} + 4 \text{ H}_2\text{O} + \text{C=O} + \text{O=CC(O)O}$                                                         |
| 64_407_38 | 14    | 1     | -123.0 | 45.4  | $5 \text{ CO}_2 + 8 \text{ H}_2 \rightarrow \text{CC(=O)O} + 3 \text{ H}_2\text{O} + \text{OC=O} + \text{O=CC(O)O}$                                                        |
| 64_407_39 | 14    | 1     | -133.9 | 45.4  | $5 \text{ CO}_2 + 9 \text{ H}_2 \rightarrow \text{CC(=O)O} + 4 \text{ H}_2\text{O} + \text{C=O} + \text{O=CC(O)O}$                                                         |
| 64_407_40 | 14    | 1     | -123.0 | 45.4  | $5 \text{ CO}_2 + 8 \text{ H}_2 \rightarrow \text{CC(=O)O} + 3 \text{ H}_2\text{O} + \text{OC=O} + \text{O=CC(O)O}$                                                        |
| 64_407_41 | 14    | 1     | -133.9 | 45.4  | $5 \text{ CO}_2 + 9 \text{ H}_2 \rightarrow \text{CC(=O)O} + 4 \text{ H}_2\text{O} + \text{C=O} + \text{O=CC(O)O}$                                                         |
| 64_407_42 | 13    | 1     | -112.1 | 45.4  | $5 \text{ CO}_2 + 8 \text{ H}_2 \rightarrow 3 \text{ H}_2\text{O} + \text{OC(CC(=O)O)O} + \text{O=CC(O)O}$                                                                 |
| 64_407_43 | 13    | 0     | -142.5 | 45.4  | $4 \text{ CO}_2 + 9 \text{ H}_2 + \text{OCC(=O)C(=O)O} \rightarrow$<br>$\rightarrow \text{OCC(=O)O} + 4 \text{ H}_2\text{O} + \text{C=O} + \text{CC=O} + \text{O=CC(O)O}$  |
| 64_407_44 | 13    | 0     | -131.6 | 45.4  | $4 \text{ CO}_2 + 8 \text{ H}_2 + \text{OCC(=O)C(=O)O} \rightarrow$<br>$\rightarrow 3 \text{ H}_2\text{O} + \text{OCC(=O)O} + \text{OC=O} + \text{CC=O} + \text{O=CC(O)O}$ |
| 64_407_45 | 13    | 0     | -142.5 | 45.4  | $4 \text{ CO}_2 + 9 \text{ H}_2 + \text{OCC(=O)C(=O)O} \rightarrow$<br>$\rightarrow \text{OCC(=O)O} + 4 \text{ H}_2\text{O} + \text{C=O} + \text{CC=O} + \text{O=CC(O)O}$  |

| Label     | $n_M$ | $n_B$ | $E_C$  | $E_H$ | Net reaction                                                                                                                                                                  |
|-----------|-------|-------|--------|-------|-------------------------------------------------------------------------------------------------------------------------------------------------------------------------------|
| 64_407_46 | 13    | 0     | -131.6 | 45.4  | $4 \text{ CO}_2 + 8 \text{ H}_2 + \text{OCC(=O)C(=O)O} \rightarrow$<br>$\rightarrow 3 \text{ H}_2\text{O} + \text{OCC(=O)O} + \text{OC=O} + \text{CC=O} + \text{O=CC(O)O}$    |
| 64_407_47 | 13    | 0     | -142.5 | 45.4  | $4 \text{ CO}_2 + 9 \text{ H}_2 + \text{OCC(=O)C(=O)O} \rightarrow$<br>$\rightarrow \text{OCC(=O)O} + 4 \text{ H}_2\text{O} + \text{C=O} + \text{CC=O} + \text{O=CC(O)O}$     |
| 64_407_48 | 13    | 0     | -131.6 | 45.4  | $4 \text{ CO}_2 + 8 \text{ H}_2 + \text{OCC(=O)C(=O)O} \rightarrow$<br>$\rightarrow 3 \text{ H}_2\text{O} + \text{OCC(=O)O} + \text{OC=O} + \text{CC=O} + \text{O=CC(O)O}$    |
| 64_407_49 | 13    | 0     | -142.5 | 45.4  | $4 \text{ CO}_2 + 9 \text{ H}_2 + \text{OCC(=O)C(=O)O} \rightarrow$<br>$\rightarrow \text{OCC(=O)O} + 4 \text{ H}_2\text{O} + \text{CC=O} + \text{C=O} + \text{O=CC(O)O}$     |
| 64_407_50 | 13    | 0     | -131.6 | 45.4  | $4 \text{ CO}_2 + 8 \text{ H}_2 + \text{OCC(=O)C(=O)O} \rightarrow$<br>$\rightarrow 3 \text{ H}_2\text{O} + \text{OCC(=O)O} + \text{OC=O} + \text{CC=O} + \text{O=CC(O)O}$    |
| 64_407_51 | 13    | 0     | -142.5 | 45.4  | $4 \text{ CO}_2 + 9 \text{ H}_2 + \text{OCC(=O)C(=O)O} \rightarrow$<br>$\rightarrow \text{OCC(=O)O} + 4 \text{ H}_2\text{O} + \text{CC=O} + \text{C=O} + \text{O=CC(O)O}$     |
| 64_407_52 | 13    | 0     | -131.6 | 45.4  | $4 \text{ CO}_2 + 8 \text{ H}_2 + \text{OCC(=O)C(=O)O} \rightarrow$<br>$\rightarrow 3 \text{ H}_2\text{O} + \text{OCC(=O)O} + \text{OC=O} + \text{CC=O} + \text{O=CC(O)O}$    |
| 64_407_53 | 13    | 1     | -127.9 | 45.4  | $4 \text{ CO}_2 + 8 \text{ H}_2 + \text{OCC(=O)C(=O)O} \rightarrow$<br>$\rightarrow \text{CC(=O)O} + \text{OCC(=O)O} + 3 \text{ H}_2\text{O} + \text{C=O} + \text{O=CC(O)O}$  |
| 64_407_54 | 13    | 1     | -117.0 | 45.4  | $4 \text{ CO}_2 + 7 \text{ H}_2 + \text{OCC(=O)C(=O)O} \rightarrow$<br>$\rightarrow \text{CC(=O)O} + 2 \text{ H}_2\text{O} + \text{OCC(=O)O} + \text{OC=O} + \text{O=CC(O)O}$ |

| Label     | $n_M$ | $n_B$ | $E_C$  | $E_H$ | Net reaction                                                                                                                                                                  |
|-----------|-------|-------|--------|-------|-------------------------------------------------------------------------------------------------------------------------------------------------------------------------------|
| 64_407_55 | 13    | 1     | -127.9 | 45.4  | $4 \text{ CO}_2 + 8 \text{ H}_2 + \text{OCC(=O)C(=O)O} \rightarrow$<br>$\rightarrow \text{CC(=O)O} + \text{OCC(=O)O} + 3 \text{ H}_2\text{O} + \text{C=O} + \text{O=CC(O)O}$  |
| 64_407_56 | 13    | 1     | -117.0 | 45.4  | $4 \text{ CO}_2 + 7 \text{ H}_2 + \text{OCC(=O)C(=O)O} \rightarrow$<br>$\rightarrow \text{CC(=O)O} + 2 \text{ H}_2\text{O} + \text{OCC(=O)O} + \text{OC=O} + \text{O=CC(O)O}$ |
| 64_407_57 | 13    | 1     | -127.9 | 45.4  | $4 \text{ CO}_2 + 8 \text{ H}_2 + \text{OCC(=O)C(=O)O} \rightarrow$<br>$\rightarrow \text{CC(=O)O} + \text{OCC(=O)O} + 3 \text{ H}_2\text{O} + \text{C=O} + \text{O=CC(O)O}$  |
| 64_407_58 | 12    | 1     | -106.1 | 45.4  | $4 \text{ CO}_2 + 7 \text{ H}_2 + \text{OCC(=O)C(=O)O} \rightarrow$<br>$\rightarrow 2 \text{ H}_2\text{O} + \text{OC(CC(=O)O)O} + \text{OCC(=O)O} + \text{O=CC(O)O}$          |
| 64_407_61 | 15    | 1     | -133.9 | 52.6  | $5 \text{ CO}_2 + 9 \text{ H}_2 \rightarrow \text{CC(=O)O} + 4 \text{ H}_2\text{O} + \text{C=O} + \text{O=CC(O)O}$                                                            |
| 64_407_62 | 15    | 1     | -123.0 | 52.6  | $5 \text{ CO}_2 + 8 \text{ H}_2 \rightarrow \text{CC(=O)O} + 3 \text{ H}_2\text{O} + \text{OC=O} + \text{O=CC(O)O}$                                                           |
| 64_407_63 | 15    | 1     | -133.9 | 52.6  | $5 \text{ CO}_2 + 9 \text{ H}_2 \rightarrow \text{CC(=O)O} + 4 \text{ H}_2\text{O} + \text{C=O} + \text{O=CC(O)O}$                                                            |
| 64_407_64 | 15    | 1     | -123.0 | 52.6  | $5 \text{ CO}_2 + 8 \text{ H}_2 \rightarrow \text{CC(=O)O} + 3 \text{ H}_2\text{O} + \text{OC=O} + \text{O=CC(O)O}$                                                           |
| 64_407_65 | 15    | 0     | -148.5 | 45.7  | $5 \text{ CO}_2 + 10 \text{ H}_2 \rightarrow 5 \text{ H}_2\text{O} + \text{CC=O} + \text{C=O} + \text{O=CC(O)O}$                                                              |
| 64_407_66 | 15    | 0     | -137.6 | 45.7  | $5 \text{ CO}_2 + 9 \text{ H}_2 \rightarrow 4 \text{ H}_2\text{O} + \text{OC=O} + \text{CC=O} + \text{O=CC(O)O}$                                                              |
| 64_407_67 | 15    | 0     | -148.5 | 45.7  | $5 \text{ CO}_2 + 10 \text{ H}_2 \rightarrow 5 \text{ H}_2\text{O} + \text{CC=O} + \text{C=O} + \text{O=CC(O)O}$                                                              |
| 64_407_68 | 15    | 0     | -137.6 | 45.7  | $5 \text{ CO}_2 + 9 \text{ H}_2 \rightarrow 4 \text{ H}_2\text{O} + \text{OC=O} + \text{CC=O} + \text{O=CC(O)O}$                                                              |
| 64_407_69 | 15    | 1     | -133.9 | 45.7  | $5 \text{ CO}_2 + 9 \text{ H}_2 \rightarrow \text{CC(=O)O} + 4 \text{ H}_2\text{O} + \text{C=O} + \text{O=CC(O)O}$                                                            |
| 64_407_70 | 15    | 1     | -123.0 | 45.7  | $5 \text{ CO}_2 + 8 \text{ H}_2 \rightarrow \text{CC(=O)O} + 3 \text{ H}_2\text{O} + \text{OC=O} + \text{O=CC(O)O}$                                                           |

| Label     | $n_M$ | $n_B$ | $E_C$  | $E_H$ | Net reaction                                                                                                        |
|-----------|-------|-------|--------|-------|---------------------------------------------------------------------------------------------------------------------|
| 64_407_71 | 15    | 1     | -133.9 | 45.7  | $5 \text{ CO}_2 + 9 \text{ H}_2 \rightarrow \text{CC(=O)O} + 4 \text{ H}_2\text{O} + \text{C=O} + \text{O=CC(O)O}$  |
| 64_407_72 | 15    | 1     | -123.0 | 45.7  | $5 \text{ CO}_2 + 8 \text{ H}_2 \rightarrow \text{CC(=O)O} + 3 \text{ H}_2\text{O} + \text{OC=O} + \text{O=CC(O)O}$ |
| 64_407_73 | 15    | 1     | -133.9 | 45.7  | $5 \text{ CO}_2 + 9 \text{ H}_2 \rightarrow \text{CC(=O)O} + 4 \text{ H}_2\text{O} + \text{C=O} + \text{O=CC(O)O}$  |
| 64_407_74 | 14    | 1     | -112.1 | 45.7  | $5 \text{ CO}_2 + 8 \text{ H}_2 \rightarrow 3 \text{ H}_2\text{O} + \text{OC(CC(=O)O)O} + \text{O=CC(O)O}$          |
| 64_407_75 | 14    | 0     | -148.5 | 39.5  | $5 \text{ CO}_2 + 10 \text{ H}_2 \rightarrow 5 \text{ H}_2\text{O} + \text{C=O} + \text{CC=O} + \text{O=CC(O)O}$    |
| 64_407_76 | 14    | 0     | -137.6 | 39.5  | $5 \text{ CO}_2 + 9 \text{ H}_2 \rightarrow 4 \text{ H}_2\text{O} + \text{OC=O} + \text{CC=O} + \text{O=CC(O)O}$    |
| 64_407_77 | 14    | 0     | -148.5 | 39.5  | $5 \text{ CO}_2 + 10 \text{ H}_2 \rightarrow 5 \text{ H}_2\text{O} + \text{C=O} + \text{CC=O} + \text{O=CC(O)O}$    |
| 64_407_78 | 14    | 0     | -137.6 | 39.5  | $5 \text{ CO}_2 + 9 \text{ H}_2 \rightarrow 4 \text{ H}_2\text{O} + \text{OC=O} + \text{CC=O} + \text{O=CC(O)O}$    |
| 64_407_79 | 14    | 0     | -148.5 | 39.5  | $5 \text{ CO}_2 + 10 \text{ H}_2 \rightarrow 5 \text{ H}_2\text{O} + \text{C=O} + \text{CC=O} + \text{O=CC(O)O}$    |
| 64_407_80 | 14    | 0     | -137.6 | 39.5  | $5 \text{ CO}_2 + 9 \text{ H}_2 \rightarrow 4 \text{ H}_2\text{O} + \text{OC=O} + \text{CC=O} + \text{O=CC(O)O}$    |
| 64_407_81 | 14    | 0     | -148.5 | 39.5  | $5 \text{ CO}_2 + 10 \text{ H}_2 \rightarrow 5 \text{ H}_2\text{O} + \text{CC=O} + \text{C=O} + \text{O=CC(O)O}$    |
| 64_407_82 | 14    | 0     | -137.6 | 39.5  | $5 \text{ CO}_2 + 9 \text{ H}_2 \rightarrow 4 \text{ H}_2\text{O} + \text{OC=O} + \text{CC=O} + \text{O=CC(O)O}$    |
| 64_407_83 | 14    | 0     | -148.5 | 39.5  | $5 \text{ CO}_2 + 10 \text{ H}_2 \rightarrow 5 \text{ H}_2\text{O} + \text{CC=O} + \text{C=O} + \text{O=CC(O)O}$    |
| 64_407_84 | 14    | 0     | -137.6 | 39.5  | $5 \text{ CO}_2 + 9 \text{ H}_2 \rightarrow 4 \text{ H}_2\text{O} + \text{OC=O} + \text{CC=O} + \text{O=CC(O)O}$    |
| 64_407_85 | 14    | 1     | -133.9 | 39.5  | $5 \text{ CO}_2 + 9 \text{ H}_2 \rightarrow \text{CC(=O)O} + 4 \text{ H}_2\text{O} + \text{C=O} + \text{O=CC(O)O}$  |
| 64_407_86 | 14    | 1     | -123.0 | 39.5  | $5 \text{ CO}_2 + 8 \text{ H}_2 \rightarrow \text{CC(=O)O} + 3 \text{ H}_2\text{O} + \text{OC=O} + \text{O=CC(O)O}$ |
| 64_407_87 | 14    | 1     | -133.9 | 39.5  | $5 \text{ CO}_2 + 9 \text{ H}_2 \rightarrow \text{CC(=O)O} + 4 \text{ H}_2\text{O} + \text{C=O} + \text{O=CC(O)O}$  |
| 64_407_88 | 14    | 1     | -123.0 | 39.5  | $5 \text{ CO}_2 + 8 \text{ H}_2 \rightarrow \text{CC(=O)O} + 3 \text{ H}_2\text{O} + \text{OC=O} + \text{O=CC(O)O}$ |

| Label     | $n_M$ | $n_B$ | $E_C$  | $E_H$ | Net reaction                                                                                                                                                                                                                          |
|-----------|-------|-------|--------|-------|---------------------------------------------------------------------------------------------------------------------------------------------------------------------------------------------------------------------------------------|
| 64_407_89 | 14    | 1     | -133.9 | 39.5  | $5 \text{ CO}_2 + 9 \text{ H}_2 \rightarrow \text{CC}(=\text{O})\text{O} + 4 \text{ H}_2\text{O} + \text{C}=\text{O} + \text{O}=\text{CC}(\text{O})\text{O}$                                                                          |
| 64_407_90 | 13    | 1     | -112.1 | 39.5  | $5 \text{ CO}_2 + 8 \text{ H}_2 \rightarrow 3 \text{ H}_2\text{O} + \text{OC}(\text{CC}(=\text{O})\text{O})\text{O} + \text{O}=\text{CC}(\text{O})\text{O}$                                                                           |
| 64_407_91 | 12    | 0     | -74.8  | 44.4  | $4 \text{ CO}_2 + 7 \text{ H}_2 \rightarrow 3 \text{ H}_2\text{O} + 2 \text{ C}=\text{O} + \text{O}=\text{CC}(\text{O})\text{O}$                                                                                                      |
| 64_407_92 | 11    | 0     | -64.0  | 44.4  | $4 \text{ CO}_2 + 6 \text{ H}_2 \rightarrow 2 \text{ H}_2\text{O} + \text{OC}=\text{O} + \text{C}=\text{O} + \text{O}=\text{CC}(\text{O})\text{O}$                                                                                    |
| 64_425_1  | 10    | 0     | -54.5  | 32.3  | $4 \text{ CO}_2 + 5 \text{ H}_2 \rightarrow 2 \text{ H}_2\text{O} + \text{O}=\text{CC}(=\text{O})\text{O} + \text{OCC}(=\text{O})\text{O}$                                                                                            |
| 64_425_4  | 11    | 0     | -37.2  | 29.3  | $3 \text{ CO}_2 + 4 \text{ H}_2 \rightarrow 2 \text{ H}_2\text{O} + \text{C}=\text{O} + \text{O}=\text{CC}(=\text{O})\text{O}$                                                                                                        |
| 64_425_6  | 10    | 0     | -54.5  | 34.0  | $4 \text{ CO}_2 + 5 \text{ H}_2 \rightarrow 2 \text{ H}_2\text{O} + \text{O}=\text{CC}(=\text{O})\text{O} + \text{OCC}(=\text{O})\text{O}$                                                                                            |
| 64_425_9  | 10    | 0     | -37.2  | 34.0  | $3 \text{ CO}_2 + 4 \text{ H}_2 \rightarrow 2 \text{ H}_2\text{O} + \text{C}=\text{O} + \text{O}=\text{CC}(=\text{O})\text{O}$                                                                                                        |
| 64_425_11 | 10    | 0     | -54.5  | 34.0  | $4 \text{ CO}_2 + 5 \text{ H}_2 \rightarrow 2 \text{ H}_2\text{O} + \text{O}=\text{CC}(=\text{O})\text{O} + \text{OCC}(=\text{O})\text{O}$                                                                                            |
| 64_425_14 | 9     | 0     | -34.3  | 34.0  | $3 \text{ CO}_2 + 4 \text{ H}_2 + \text{OC}(=\text{O})\text{C}=\text{C} \rightarrow$<br>$\rightarrow \text{OC}(=\text{O})\text{C}(\text{O})\text{C} + \text{H}_2\text{O} + \text{C}=\text{O} + \text{O}=\text{CC}(=\text{O})\text{O}$ |
| 64_425_15 | 9     | 0     | -37.2  | 34.0  | $3 \text{ CO}_2 + 4 \text{ H}_2 \rightarrow 2 \text{ H}_2\text{O} + \text{C}=\text{O} + \text{O}=\text{CC}(=\text{O})\text{O}$                                                                                                        |
| 64_425_16 | 10    | 0     | -54.5  | 42.3  | $4 \text{ CO}_2 + 5 \text{ H}_2 \rightarrow 2 \text{ H}_2\text{O} + \text{O}=\text{CC}(=\text{O})\text{O} + \text{OCC}(=\text{O})\text{O}$                                                                                            |
| 64_425_19 | 10    | 0     | -37.2  | 42.3  | $3 \text{ CO}_2 + 4 \text{ H}_2 \rightarrow 2 \text{ H}_2\text{O} + \text{C}=\text{O} + \text{O}=\text{CC}(=\text{O})\text{O}$                                                                                                        |
| 64_425_21 | 10    | 0     | -54.5  | 34.2  | $4 \text{ CO}_2 + 5 \text{ H}_2 \rightarrow 2 \text{ H}_2\text{O} + \text{O}=\text{CC}(=\text{O})\text{O} + \text{OCC}(=\text{O})\text{O}$                                                                                            |
| 64_425_24 | 9     | 0     | -34.3  | 34.2  | $3 \text{ CO}_2 + 4 \text{ H}_2 + \text{OC}(=\text{O})\text{C}=\text{C} \rightarrow$<br>$\rightarrow \text{OC}(=\text{O})\text{C}(\text{O})\text{C} + \text{H}_2\text{O} + \text{C}=\text{O} + \text{O}=\text{CC}(=\text{O})\text{O}$ |
| 64_425_25 | 9     | 0     | -37.2  | 34.2  | $3 \text{ CO}_2 + 4 \text{ H}_2 \rightarrow 2 \text{ H}_2\text{O} + \text{C}=\text{O} + \text{O}=\text{CC}(=\text{O})\text{O}$                                                                                                        |

| Label     | $n_M$ | $n_B$ | $E_C$  | $E_H$ | Net reaction                                                                                                                                                  |
|-----------|-------|-------|--------|-------|---------------------------------------------------------------------------------------------------------------------------------------------------------------|
| 64_458_33 | 15    | 0     | -148.5 | 45.4  | $5 \text{ CO}_2 + 10 \text{ H}_2 \rightarrow 5 \text{ H}_2\text{O} + \text{CC}=\text{O} + \text{C}=\text{O} + \text{O}=\text{CC}(\text{O})\text{O}$           |
| 64_458_34 | 15    | 0     | -137.6 | 45.4  | $5 \text{ CO}_2 + 9 \text{ H}_2 \rightarrow 4 \text{ H}_2\text{O} + \text{OC}=\text{O} + \text{CC}=\text{O} + \text{O}=\text{CC}(\text{O})\text{O}$           |
| 64_458_35 | 15    | 0     | -148.5 | 45.4  | $5 \text{ CO}_2 + 10 \text{ H}_2 \rightarrow 5 \text{ H}_2\text{O} + \text{CC}=\text{O} + \text{C}=\text{O} + \text{O}=\text{CC}(\text{O})\text{O}$           |
| 64_458_36 | 15    | 0     | -137.6 | 45.4  | $5 \text{ CO}_2 + 9 \text{ H}_2 \rightarrow 4 \text{ H}_2\text{O} + \text{OC}=\text{O} + \text{CC}=\text{O} + \text{O}=\text{CC}(\text{O})\text{O}$           |
| 64_458_37 | 15    | 1     | -133.9 | 45.4  | $5 \text{ CO}_2 + 9 \text{ H}_2 \rightarrow \text{CC}(=\text{O})\text{O} + 4 \text{ H}_2\text{O} + \text{C}=\text{O} + \text{O}=\text{CC}(\text{O})\text{O}$  |
| 64_458_38 | 15    | 1     | -123.0 | 45.4  | $5 \text{ CO}_2 + 8 \text{ H}_2 \rightarrow \text{CC}(=\text{O})\text{O} + 3 \text{ H}_2\text{O} + \text{OC}=\text{O} + \text{O}=\text{CC}(\text{O})\text{O}$ |
| 64_458_39 | 15    | 1     | -133.9 | 45.4  | $5 \text{ CO}_2 + 9 \text{ H}_2 \rightarrow \text{CC}(=\text{O})\text{O} + 4 \text{ H}_2\text{O} + \text{C}=\text{O} + \text{O}=\text{CC}(\text{O})\text{O}$  |
| 64_458_40 | 15    | 1     | -123.0 | 45.4  | $5 \text{ CO}_2 + 8 \text{ H}_2 \rightarrow \text{CC}(=\text{O})\text{O} + 3 \text{ H}_2\text{O} + \text{OC}=\text{O} + \text{O}=\text{CC}(\text{O})\text{O}$ |
| 64_458_41 | 15    | 1     | -133.9 | 45.4  | $5 \text{ CO}_2 + 9 \text{ H}_2 \rightarrow \text{CC}(=\text{O})\text{O} + 4 \text{ H}_2\text{O} + \text{C}=\text{O} + \text{O}=\text{CC}(\text{O})\text{O}$  |
| 64_458_42 | 14    | 1     | -112.1 | 45.4  | $5 \text{ CO}_2 + 8 \text{ H}_2 \rightarrow 3 \text{ H}_2\text{O} + \text{OC}(\text{CC}(=\text{O})\text{O})\text{O} + \text{O}=\text{CC}(\text{O})\text{O}$   |
| 64_458_75 | 15    | 0     | -148.5 | 39.5  | $5 \text{ CO}_2 + 10 \text{ H}_2 \rightarrow 5 \text{ H}_2\text{O} + \text{C}=\text{O} + \text{CC}=\text{O} + \text{O}=\text{CC}(\text{O})\text{O}$           |
| 64_458_76 | 15    | 0     | -137.6 | 39.5  | $5 \text{ CO}_2 + 9 \text{ H}_2 \rightarrow 4 \text{ H}_2\text{O} + \text{OC}=\text{O} + \text{CC}=\text{O} + \text{O}=\text{CC}(\text{O})\text{O}$           |
| 64_458_77 | 15    | 0     | -148.5 | 39.5  | $5 \text{ CO}_2 + 10 \text{ H}_2 \rightarrow 5 \text{ H}_2\text{O} + \text{C}=\text{O} + \text{CC}=\text{O} + \text{O}=\text{CC}(\text{O})\text{O}$           |
| 64_458_78 | 15    | 0     | -137.6 | 39.5  | $5 \text{ CO}_2 + 9 \text{ H}_2 \rightarrow 4 \text{ H}_2\text{O} + \text{OC}=\text{O} + \text{CC}=\text{O} + \text{O}=\text{CC}(\text{O})\text{O}$           |
| 64_458_79 | 15    | 0     | -148.5 | 39.5  | $5 \text{ CO}_2 + 10 \text{ H}_2 \rightarrow 5 \text{ H}_2\text{O} + \text{C}=\text{O} + \text{CC}=\text{O} + \text{O}=\text{CC}(\text{O})\text{O}$           |
| 64_458_80 | 15    | 0     | -137.6 | 39.5  | $5 \text{ CO}_2 + 9 \text{ H}_2 \rightarrow 4 \text{ H}_2\text{O} + \text{OC}=\text{O} + \text{CC}=\text{O} + \text{O}=\text{CC}(\text{O})\text{O}$           |
| 64_458_81 | 15    | 0     | -148.5 | 39.5  | $5 \text{ CO}_2 + 10 \text{ H}_2 \rightarrow 5 \text{ H}_2\text{O} + \text{CC}=\text{O} + \text{C}=\text{O} + \text{O}=\text{CC}(\text{O})\text{O}$           |
| 64_458_82 | 15    | 0     | -137.6 | 39.5  | $5 \text{ CO}_2 + 9 \text{ H}_2 \rightarrow 4 \text{ H}_2\text{O} + \text{OC}=\text{O} + \text{CC}=\text{O} + \text{O}=\text{CC}(\text{O})\text{O}$           |

| Label     | $n_M$ | $n_B$ | $E_C$  | $E_H$ | Net reaction                                                                                                                                                   |
|-----------|-------|-------|--------|-------|----------------------------------------------------------------------------------------------------------------------------------------------------------------|
| 64_458_83 | 15    | 0     | -148.5 | 39.5  | $5 \text{ CO}_2 + 10 \text{ H}_2 \rightarrow 5 \text{ H}_2\text{O} + \text{CC}=\text{O} + \text{C}=\text{O} + \text{O}=\text{CC}(\text{O})\text{O}$            |
| 64_458_84 | 15    | 0     | -137.6 | 39.5  | $5 \text{ CO}_2 + 9 \text{ H}_2 \rightarrow 4 \text{ H}_2\text{O} + \text{OC}=\text{O} + \text{CC}=\text{O} + \text{O}=\text{CC}(\text{O})\text{O}$            |
| 64_458_85 | 15    | 1     | -133.9 | 39.5  | $5 \text{ CO}_2 + 9 \text{ H}_2 \rightarrow \text{CC}(=\text{O})\text{O} + 4 \text{ H}_2\text{O} + \text{C}=\text{O} + \text{O}=\text{CC}(\text{O})\text{O}$   |
| 64_458_86 | 15    | 1     | -123.0 | 39.5  | $5 \text{ CO}_2 + 8 \text{ H}_2 \rightarrow \text{CC}(=\text{O})\text{O} + 3 \text{ H}_2\text{O} + \text{OC}=\text{O} + \text{O}=\text{CC}(\text{O})\text{O}$  |
| 64_458_87 | 15    | 1     | -133.9 | 39.5  | $5 \text{ CO}_2 + 9 \text{ H}_2 \rightarrow \text{CC}(=\text{O})\text{O} + 4 \text{ H}_2\text{O} + \text{C}=\text{O} + \text{O}=\text{CC}(\text{O})\text{O}$   |
| 64_458_88 | 15    | 1     | -123.0 | 39.5  | $5 \text{ CO}_2 + 8 \text{ H}_2 \rightarrow \text{CC}(=\text{O})\text{O} + 3 \text{ H}_2\text{O} + \text{OC}=\text{O} + \text{O}=\text{CC}(\text{O})\text{O}$  |
| 64_458_89 | 15    | 1     | -133.9 | 39.5  | $5 \text{ CO}_2 + 9 \text{ H}_2 \rightarrow \text{CC}(=\text{O})\text{O} + 4 \text{ H}_2\text{O} + \text{C}=\text{O} + \text{O}=\text{CC}(\text{O})\text{O}$   |
| 64_458_90 | 14    | 1     | -112.1 | 39.5  | $5 \text{ CO}_2 + 8 \text{ H}_2 \rightarrow 3 \text{ H}_2\text{O} + \text{OC}(\text{CC}(=\text{O})\text{O})\text{O} + \text{O}=\text{CC}(\text{O})\text{O}$    |
| 64_458_91 | 13    | 0     | -74.8  | 44.4  | $4 \text{ CO}_2 + 7 \text{ H}_2 \rightarrow 3 \text{ H}_2\text{O} + 2 \text{ C}=\text{O} + \text{O}=\text{CC}(\text{O})\text{O}$                               |
| 64_458_92 | 12    | 0     | -64.0  | 44.4  | $4 \text{ CO}_2 + 6 \text{ H}_2 \rightarrow 2 \text{ H}_2\text{O} + \text{OC}=\text{O} + \text{C}=\text{O} + \text{O}=\text{CC}(\text{O})\text{O}$             |
| 64_465_1  | 16    | 1     | -119.7 | 36.6  | $5 \text{ CO}_2 + 8 \text{ H}_2 \rightarrow \text{CC}(=\text{O})\text{O} + 4 \text{ H}_2\text{O} + \text{O}=\text{CC}(=\text{O})\text{O} + \text{C}=\text{O}$  |
| 64_465_2  | 16    | 1     | -119.7 | 41.3  | $5 \text{ CO}_2 + 8 \text{ H}_2 \rightarrow \text{CC}(=\text{O})\text{O} + 4 \text{ H}_2\text{O} + \text{O}=\text{CC}(=\text{O})\text{O} + \text{C}=\text{O}$  |
| 64_465_3  | 16    | 1     | -119.7 | 39.6  | $5 \text{ CO}_2 + 8 \text{ H}_2 \rightarrow \text{CC}(=\text{O})\text{O} + 4 \text{ H}_2\text{O} + \text{O}=\text{CC}(=\text{O})\text{O} + \text{C}=\text{O}$  |
| 64_465_4  | 16    | 1     | -108.8 | 36.6  | $5 \text{ CO}_2 + 7 \text{ H}_2 \rightarrow \text{CC}(=\text{O})\text{O} + 3 \text{ H}_2\text{O} + \text{OC}=\text{O} + \text{O}=\text{CC}(=\text{O})\text{O}$ |
| 64_465_5  | 16    | 1     | -108.8 | 41.3  | $5 \text{ CO}_2 + 7 \text{ H}_2 \rightarrow \text{CC}(=\text{O})\text{O} + 3 \text{ H}_2\text{O} + \text{OC}=\text{O} + \text{O}=\text{CC}(=\text{O})\text{O}$ |
| 64_465_6  | 16    | 1     | -108.8 | 39.6  | $5 \text{ CO}_2 + 7 \text{ H}_2 \rightarrow \text{CC}(=\text{O})\text{O} + 3 \text{ H}_2\text{O} + \text{OC}=\text{O} + \text{O}=\text{CC}(=\text{O})\text{O}$ |
| 64_465_7  | 16    | 1     | -119.7 | 36.6  | $5 \text{ CO}_2 + 8 \text{ H}_2 \rightarrow \text{CC}(=\text{O})\text{O} + 4 \text{ H}_2\text{O} + \text{O}=\text{CC}(=\text{O})\text{O} + \text{C}=\text{O}$  |
| 64_465_8  | 16    | 1     | -119.7 | 41.3  | $5 \text{ CO}_2 + 8 \text{ H}_2 \rightarrow \text{CC}(=\text{O})\text{O} + 4 \text{ H}_2\text{O} + \text{O}=\text{CC}(=\text{O})\text{O} + \text{C}=\text{O}$  |



| Label     | $n_M$ | $n_B$ | $E_C$  | $E_H$ | Net reaction                                                                                                         |
|-----------|-------|-------|--------|-------|----------------------------------------------------------------------------------------------------------------------|
| 64_465_9  | 16    | 1     | -119.7 | 39.6  | $5 \text{ CO}_2 + 8 \text{ H}_2 \rightarrow \text{CC(=O)O} + 4 \text{ H}_2\text{O} + \text{O=CC(=O)O} + \text{C=O}$  |
| 64_465_10 | 16    | 1     | -108.8 | 36.6  | $5 \text{ CO}_2 + 7 \text{ H}_2 \rightarrow \text{CC(=O)O} + 3 \text{ H}_2\text{O} + \text{OC=O} + \text{O=CC(=O)O}$ |
| 64_465_11 | 16    | 1     | -108.8 | 41.3  | $5 \text{ CO}_2 + 7 \text{ H}_2 \rightarrow \text{CC(=O)O} + 3 \text{ H}_2\text{O} + \text{OC=O} + \text{O=CC(=O)O}$ |
| 64_465_12 | 16    | 1     | -108.8 | 39.6  | $5 \text{ CO}_2 + 7 \text{ H}_2 \rightarrow \text{CC(=O)O} + 3 \text{ H}_2\text{O} + \text{OC=O} + \text{O=CC(=O)O}$ |
| 64_471_7  | 18    | 0     | -181.7 | 37.8  | $4 \text{ CO}_2 + 10 \text{ H}_2 \rightarrow 6 \text{ H}_2\text{O} + \text{CCC=O} + \text{C=O}$                      |
| 64_471_8  | 18    | 0     | -170.9 | 37.8  | $4 \text{ CO}_2 + 9 \text{ H}_2 \rightarrow 5 \text{ H}_2\text{O} + \text{CCC=O} + \text{OC=O}$                      |
| 64_471_9  | 18    | 0     | -181.7 | 33.5  | $4 \text{ CO}_2 + 10 \text{ H}_2 \rightarrow 6 \text{ H}_2\text{O} + \text{CCC=O} + \text{C=O}$                      |
| 64_471_10 | 18    | 0     | -170.9 | 33.5  | $4 \text{ CO}_2 + 9 \text{ H}_2 \rightarrow 5 \text{ H}_2\text{O} + \text{CCC=O} + \text{OC=O}$                      |
| 64_471_11 | 18    | 0     | -181.7 | 34.0  | $4 \text{ CO}_2 + 10 \text{ H}_2 \rightarrow 6 \text{ H}_2\text{O} + \text{CCC=O} + \text{C=O}$                      |
| 64_471_12 | 18    | 0     | -170.9 | 34.0  | $4 \text{ CO}_2 + 9 \text{ H}_2 \rightarrow 5 \text{ H}_2\text{O} + \text{CCC=O} + \text{OC=O}$                      |
| 64_484_4  | 11    | 0     | -97.1  | 34.6  | $2 \text{ CO}_2 + 5 \text{ H}_2 \rightarrow 3 \text{ H}_2\text{O} + \text{CC=O}$                                     |
| 64_484_5  | 11    | 0     | -97.1  | 31.9  | $2 \text{ CO}_2 + 5 \text{ H}_2 \rightarrow 3 \text{ H}_2\text{O} + \text{CC=O}$                                     |
| 64_484_6  | 11    | 0     | -97.1  | 31.9  | $2 \text{ CO}_2 + 5 \text{ H}_2 \rightarrow 3 \text{ H}_2\text{O} + \text{CC=O}$                                     |
| 64_484_7  | 11    | 0     | -97.1  | 31.9  | $2 \text{ CO}_2 + 5 \text{ H}_2 \rightarrow 3 \text{ H}_2\text{O} + \text{CC=O}$                                     |
| 64_484_8  | 11    | 0     | -97.1  | 31.9  | $2 \text{ CO}_2 + 5 \text{ H}_2 \rightarrow 3 \text{ H}_2\text{O} + \text{CC=O}$                                     |
| 64_484_9  | 11    | 0     | -97.1  | 31.9  | $2 \text{ CO}_2 + 5 \text{ H}_2 \rightarrow 3 \text{ H}_2\text{O} + \text{CC=O}$                                     |
| 64_484_10 | 11    | 0     | -97.1  | 30.6  | $2 \text{ CO}_2 + 5 \text{ H}_2 \rightarrow 3 \text{ H}_2\text{O} + \text{CC=O}$                                     |
| 64_484_11 | 11    | 0     | -97.1  | 30.6  | $2 \text{ CO}_2 + 5 \text{ H}_2 \rightarrow 3 \text{ H}_2\text{O} + \text{CC=O}$                                     |

| Label     | $n_M$ | $n_B$ | $E_C$  | $E_H$ | Net reaction                                                                                         |
|-----------|-------|-------|--------|-------|------------------------------------------------------------------------------------------------------|
| 64_484_12 | 11    | 0     | -97.1  | 30.6  | $2 \text{ CO}_2 + 5 \text{ H}_2 \rightarrow 3 \text{ H}_2\text{O} + \text{CC}=\text{O}$              |
| 64_484_13 | 11    | 0     | -97.1  | 30.1  | $2 \text{ CO}_2 + 5 \text{ H}_2 \rightarrow 3 \text{ H}_2\text{O} + \text{CC}=\text{O}$              |
| 64_484_14 | 11    | 0     | -97.1  | 36.5  | $2 \text{ CO}_2 + 5 \text{ H}_2 \rightarrow 3 \text{ H}_2\text{O} + \text{CC}=\text{O}$              |
| 64_496_2  | 11    | 0     | -97.1  | 34.9  | $2 \text{ CO}_2 + 5 \text{ H}_2 \rightarrow 3 \text{ H}_2\text{O} + \text{CC}=\text{O}$              |
| 64_496_4  | 11    | 0     | -97.1  | 34.9  | $2 \text{ CO}_2 + 5 \text{ H}_2 \rightarrow 3 \text{ H}_2\text{O} + \text{CC}=\text{O}$              |
| 64_496_6  | 11    | 0     | -97.1  | 34.9  | $2 \text{ CO}_2 + 5 \text{ H}_2 \rightarrow 3 \text{ H}_2\text{O} + \text{CC}=\text{O}$              |
| 64_496_8  | 11    | 0     | -97.1  | 34.9  | $2 \text{ CO}_2 + 5 \text{ H}_2 \rightarrow 3 \text{ H}_2\text{O} + \text{CC}=\text{O}$              |
| 64_496_10 | 11    | 0     | -97.1  | 34.9  | $2 \text{ CO}_2 + 5 \text{ H}_2 \rightarrow 3 \text{ H}_2\text{O} + \text{CC}=\text{O}$              |
| 64_496_12 | 11    | 0     | -97.1  | 34.9  | $2 \text{ CO}_2 + 5 \text{ H}_2 \rightarrow 3 \text{ H}_2\text{O} + \text{CC}=\text{O}$              |
| 64_496_14 | 11    | 0     | -97.1  | 34.9  | $2 \text{ CO}_2 + 5 \text{ H}_2 \rightarrow 3 \text{ H}_2\text{O} + \text{CC}=\text{O}$              |
| 64_496_16 | 11    | 0     | -97.1  | 34.9  | $2 \text{ CO}_2 + 5 \text{ H}_2 \rightarrow 3 \text{ H}_2\text{O} + \text{CC}=\text{O}$              |
| 64_496_18 | 11    | 0     | -97.1  | 34.9  | $2 \text{ CO}_2 + 5 \text{ H}_2 \rightarrow 3 \text{ H}_2\text{O} + \text{CC}=\text{O}$              |
| 64_496_20 | 11    | 0     | -97.1  | 34.9  | $2 \text{ CO}_2 + 5 \text{ H}_2 \rightarrow 3 \text{ H}_2\text{O} + \text{CC}=\text{O}$              |
| 64_496_22 | 11    | 0     | -97.1  | 39.4  | $2 \text{ CO}_2 + 5 \text{ H}_2 \rightarrow 3 \text{ H}_2\text{O} + \text{CC}=\text{O}$              |
| 90_5_1    | 15    | 0     | -164.9 | 53.3  | $8 \text{ H}_2 + 4 \text{ CO}_2 \rightarrow 4 \text{ H}_2\text{O} + 2 \text{ CC}(=\text{O})\text{O}$ |
| 90_5_3    | 15    | 0     | -164.9 | 53.3  | $8 \text{ H}_2 + 4 \text{ CO}_2 \rightarrow 4 \text{ H}_2\text{O} + 2 \text{ CC}(=\text{O})\text{O}$ |
| 90_5_5    | 15    | 0     | -164.9 | 53.3  | $8 \text{ H}_2 + 4 \text{ CO}_2 \rightarrow 4 \text{ H}_2\text{O} + 2 \text{ CC}(=\text{O})\text{O}$ |
| 90_5_7    | 15    | 0     | -164.9 | 53.3  | $4 \text{ CO}_2 + 8 \text{ H}_2 \rightarrow 4 \text{ H}_2\text{O} + 2 \text{ CC}(=\text{O})\text{O}$ |

| Label   | $n_M$ | $n_B$ | $E_C$  | $E_H$ | Net reaction                                                                                                                                                 |
|---------|-------|-------|--------|-------|--------------------------------------------------------------------------------------------------------------------------------------------------------------|
| 90_5_9  | 15    | 0     | -164.9 | 53.3  | $8 \text{ H}_2 + 4 \text{ CO}_2 \rightarrow 4 \text{ H}_2\text{O} + 2 \text{ CC(=O)O}$                                                                       |
| 90_5_11 | 15    | 0     | -164.9 | 53.3  | $4 \text{ CO}_2 + 8 \text{ H}_2 \rightarrow 4 \text{ H}_2\text{O} + 2 \text{ CC(=O)O}$                                                                       |
| 90_5_13 | 15    | 0     | -164.9 | 47.4  | $8 \text{ H}_2 + 4 \text{ CO}_2 \rightarrow 4 \text{ H}_2\text{O} + 2 \text{ CC(=O)O}$                                                                       |
| 90_5_15 | 15    | 0     | -164.9 | 47.4  | $8 \text{ H}_2 + 4 \text{ CO}_2 \rightarrow 4 \text{ H}_2\text{O} + 2 \text{ CC(=O)O}$                                                                       |
| 90_5_17 | 15    | 0     | -164.9 | 47.1  | $8 \text{ H}_2 + 4 \text{ CO}_2 \rightarrow 4 \text{ H}_2\text{O} + 2 \text{ CC(=O)O}$                                                                       |
| 90_5_19 | 15    | 0     | -164.9 | 45.8  | $4 \text{ CO}_2 + 8 \text{ H}_2 \rightarrow 4 \text{ H}_2\text{O} + 2 \text{ CC(=O)O}$                                                                       |
| 90_5_21 | 15    | 0     | -164.9 | 43.7  | $8 \text{ H}_2 + 4 \text{ CO}_2 \rightarrow 4 \text{ H}_2\text{O} + 2 \text{ CC(=O)O}$                                                                       |
| 90_5_23 | 15    | 0     | -164.9 | 45.8  | $4 \text{ CO}_2 + 8 \text{ H}_2 \rightarrow 4 \text{ H}_2\text{O} + 2 \text{ CC(=O)O}$                                                                       |
| 90_5_25 | 15    | 0     | -164.9 | 47.4  | $8 \text{ H}_2 + 4 \text{ CO}_2 \rightarrow 4 \text{ H}_2\text{O} + 2 \text{ CC(=O)O}$                                                                       |
| 90_5_27 | 15    | 0     | -164.9 | 47.4  | $8 \text{ H}_2 + 4 \text{ CO}_2 \rightarrow 4 \text{ H}_2\text{O} + 2 \text{ CC(=O)O}$                                                                       |
| 90_5_29 | 15    | 0     | -164.9 | 47.1  | $8 \text{ H}_2 + 4 \text{ CO}_2 \rightarrow 4 \text{ H}_2\text{O} + 2 \text{ CC(=O)O}$                                                                       |
| 90_5_31 | 15    | 0     | -164.9 | 45.8  | $4 \text{ CO}_2 + 8 \text{ H}_2 \rightarrow 4 \text{ H}_2\text{O} + 2 \text{ CC(=O)O}$                                                                       |
| 90_5_33 | 15    | 0     | -164.9 | 41.5  | $8 \text{ H}_2 + 4 \text{ CO}_2 \rightarrow 4 \text{ H}_2\text{O} + 2 \text{ CC(=O)O}$                                                                       |
| 90_5_35 | 15    | 0     | -164.9 | 45.8  | $4 \text{ CO}_2 + 8 \text{ H}_2 \rightarrow 4 \text{ H}_2\text{O} + 2 \text{ CC(=O)O}$                                                                       |
| 90_10_1 | 16    | 0     | -181.7 | 41.3  | $4 \text{ CO}_2 + 10 \text{ H}_2 \rightarrow 6 \text{ H}_2\text{O} + \text{ CCC=O} + \text{ C=O}$                                                            |
| 90_10_2 | 15    | 0     | -181.7 | 41.3  | $4 \text{ CO}_2 + 10 \text{ H}_2 \rightarrow 6 \text{ H}_2\text{O} + \text{ CCC=O} + \text{ C=O}$                                                            |
| 90_10_3 | 14    | 0     | -175.7 | 41.3  | $9 \text{ H}_2 + 3 \text{ CO}_2 + \text{ OCC(=O)C(=O)O} \rightarrow$<br>$\rightarrow 5 \text{ H}_2\text{O} + \text{ OCC(=O)O} + \text{ CCC=O} + \text{ C=O}$ |

| Label    | $n_M$ | $n_B$ | $E_C$  | $E_H$ | Net reaction                                                                                                                                                                                                     |
|----------|-------|-------|--------|-------|------------------------------------------------------------------------------------------------------------------------------------------------------------------------------------------------------------------|
| 90_10_4  | 16    | 0     | -181.7 | 41.3  | $4 \text{ CO}_2 + 10 \text{ H}_2 \rightarrow 6 \text{ H}_2\text{O} + \text{CCC}=\text{O} + \text{C}=\text{O}$                                                                                                    |
| 90_10_5  | 15    | 0     | -181.7 | 41.3  | $4 \text{ CO}_2 + 10 \text{ H}_2 \rightarrow 6 \text{ H}_2\text{O} + \text{CCC}=\text{O} + \text{C}=\text{O}$                                                                                                    |
| 90_10_6  | 14    | 0     | -175.7 | 41.3  | $9 \text{ H}_2 + 3 \text{ CO}_2 + \text{OCC}(=\text{O})\text{C}(=\text{O})\text{O} \rightarrow$<br>$\rightarrow 5 \text{ H}_2\text{O} + \text{OCC}(=\text{O})\text{O} + \text{CCC}=\text{O} + \text{C}=\text{O}$ |
| 90_10_7  | 16    | 0     | -181.7 | 41.3  | $4 \text{ CO}_2 + 10 \text{ H}_2 \rightarrow 6 \text{ H}_2\text{O} + \text{CCC}=\text{O} + \text{C}=\text{O}$                                                                                                    |
| 90_10_8  | 15    | 0     | -181.7 | 41.3  | $4 \text{ CO}_2 + 10 \text{ H}_2 \rightarrow 6 \text{ H}_2\text{O} + \text{CCC}=\text{O} + \text{C}=\text{O}$                                                                                                    |
| 90_10_9  | 14    | 0     | -175.7 | 41.3  | $9 \text{ H}_2 + 3 \text{ CO}_2 + \text{OCC}(=\text{O})\text{C}(=\text{O})\text{O} \rightarrow$<br>$\rightarrow 5 \text{ H}_2\text{O} + \text{OCC}(=\text{O})\text{O} + \text{CCC}=\text{O} + \text{C}=\text{O}$ |
| 90_10_10 | 16    | 0     | -181.7 | 40.3  | $4 \text{ CO}_2 + 10 \text{ H}_2 \rightarrow 6 \text{ H}_2\text{O} + \text{CCC}=\text{O} + \text{C}=\text{O}$                                                                                                    |
| 90_10_11 | 15    | 0     | -181.7 | 40.3  | $4 \text{ CO}_2 + 10 \text{ H}_2 \rightarrow 6 \text{ H}_2\text{O} + \text{CCC}=\text{O} + \text{C}=\text{O}$                                                                                                    |
| 90_10_12 | 14    | 0     | -175.7 | 40.3  | $9 \text{ H}_2 + 3 \text{ CO}_2 + \text{OCC}(=\text{O})\text{C}(=\text{O})\text{O} \rightarrow$<br>$\rightarrow 5 \text{ H}_2\text{O} + \text{OCC}(=\text{O})\text{O} + \text{CCC}=\text{O} + \text{C}=\text{O}$ |
| 90_10_13 | 16    | 0     | -181.7 | 41.3  | $4 \text{ CO}_2 + 10 \text{ H}_2 \rightarrow 6 \text{ H}_2\text{O} + \text{CCC}=\text{O} + \text{C}=\text{O}$                                                                                                    |
| 90_10_14 | 15    | 0     | -181.7 | 41.3  | $4 \text{ CO}_2 + 10 \text{ H}_2 \rightarrow 6 \text{ H}_2\text{O} + \text{CCC}=\text{O} + \text{C}=\text{O}$                                                                                                    |
| 90_10_15 | 14    | 0     | -175.7 | 41.3  | $9 \text{ H}_2 + 3 \text{ CO}_2 + \text{OCC}(=\text{O})\text{C}(=\text{O})\text{O} \rightarrow$<br>$\rightarrow 5 \text{ H}_2\text{O} + \text{OCC}(=\text{O})\text{O} + \text{CCC}=\text{O} + \text{C}=\text{O}$ |
| 90_10_16 | 16    | 0     | -181.7 | 40.3  | $4 \text{ CO}_2 + 10 \text{ H}_2 \rightarrow 6 \text{ H}_2\text{O} + \text{CCC}=\text{O} + \text{C}=\text{O}$                                                                                                    |
| 90_10_17 | 15    | 0     | -181.7 | 40.3  | $4 \text{ CO}_2 + 10 \text{ H}_2 \rightarrow 6 \text{ H}_2\text{O} + \text{CCC}=\text{O} + \text{C}=\text{O}$                                                                                                    |

| Label    | $n_M$ | $n_B$ | $E_C$  | $E_H$ | Net reaction                                                                                                                                             |
|----------|-------|-------|--------|-------|----------------------------------------------------------------------------------------------------------------------------------------------------------|
| 90_10_18 | 14    | 0     | -175.7 | 40.3  | $9 \text{ H}_2 + 3 \text{ CO}_2 + \text{OCC(=O)C(=O)O} \rightarrow$<br>$\rightarrow 5 \text{ H}_2\text{O} + \text{OCC(=O)O} + \text{CCC=O} + \text{C=O}$ |
| 90_10_19 | 16    | 0     | -181.7 | 41.3  | $4 \text{ CO}_2 + 10 \text{ H}_2 \rightarrow 6 \text{ H}_2\text{O} + \text{CCC=O} + \text{C=O}$                                                          |
| 90_10_20 | 15    | 0     | -181.7 | 41.3  | $4 \text{ CO}_2 + 10 \text{ H}_2 \rightarrow 6 \text{ H}_2\text{O} + \text{CCC=O} + \text{C=O}$                                                          |
| 90_10_21 | 14    | 0     | -175.7 | 41.3  | $9 \text{ H}_2 + 3 \text{ CO}_2 + \text{OCC(=O)C(=O)O} \rightarrow$<br>$\rightarrow 5 \text{ H}_2\text{O} + \text{OCC(=O)O} + \text{CCC=O} + \text{C=O}$ |
| 90_10_22 | 16    | 0     | -181.7 | 40.3  | $4 \text{ CO}_2 + 10 \text{ H}_2 \rightarrow 6 \text{ H}_2\text{O} + \text{CCC=O} + \text{C=O}$                                                          |
| 90_10_23 | 15    | 0     | -181.7 | 40.3  | $4 \text{ CO}_2 + 10 \text{ H}_2 \rightarrow 6 \text{ H}_2\text{O} + \text{CCC=O} + \text{C=O}$                                                          |
| 90_10_24 | 14    | 0     | -175.7 | 40.3  | $9 \text{ H}_2 + 3 \text{ CO}_2 + \text{OCC(=O)C(=O)O} \rightarrow$<br>$\rightarrow 5 \text{ H}_2\text{O} + \text{OCC(=O)O} + \text{CCC=O} + \text{C=O}$ |
| 90_10_25 | 16    | 0     | -181.7 | 41.3  | $4 \text{ CO}_2 + 10 \text{ H}_2 \rightarrow 6 \text{ H}_2\text{O} + \text{CCC=O} + \text{C=O}$                                                          |
| 90_10_26 | 15    | 0     | -181.7 | 41.3  | $4 \text{ CO}_2 + 10 \text{ H}_2 \rightarrow 6 \text{ H}_2\text{O} + \text{CCC=O} + \text{C=O}$                                                          |
| 90_10_27 | 14    | 0     | -175.7 | 41.3  | $9 \text{ H}_2 + 3 \text{ CO}_2 + \text{OCC(=O)C(=O)O} \rightarrow$<br>$\rightarrow 5 \text{ H}_2\text{O} + \text{OCC(=O)O} + \text{CCC=O} + \text{C=O}$ |
| 90_10_28 | 16    | 0     | -181.7 | 41.1  | $4 \text{ CO}_2 + 10 \text{ H}_2 \rightarrow 6 \text{ H}_2\text{O} + \text{CCC=O} + \text{C=O}$                                                          |
| 90_10_29 | 15    | 0     | -181.7 | 41.1  | $4 \text{ CO}_2 + 10 \text{ H}_2 \rightarrow 6 \text{ H}_2\text{O} + \text{CCC=O} + \text{C=O}$                                                          |
| 90_10_30 | 14    | 0     | -175.7 | 41.1  | $9 \text{ H}_2 + 3 \text{ CO}_2 + \text{OCC(=O)C(=O)O} \rightarrow$<br>$\rightarrow 5 \text{ H}_2\text{O} + \text{OCC(=O)O} + \text{CCC=O} + \text{C=O}$ |

| Label    | $n_M$ | $n_B$ | $E_C$  | $E_H$ | Net reaction                                                                                                                                                                                                     |
|----------|-------|-------|--------|-------|------------------------------------------------------------------------------------------------------------------------------------------------------------------------------------------------------------------|
| 90_10_31 | 16    | 0     | -181.7 | 41.3  | $4 \text{ CO}_2 + 10 \text{ H}_2 \rightarrow 6 \text{ H}_2\text{O} + \text{CCC}=\text{O} + \text{C}=\text{O}$                                                                                                    |
| 90_10_32 | 15    | 0     | -181.7 | 41.3  | $4 \text{ CO}_2 + 10 \text{ H}_2 \rightarrow 6 \text{ H}_2\text{O} + \text{CCC}=\text{O} + \text{C}=\text{O}$                                                                                                    |
| 90_10_33 | 14    | 0     | -175.7 | 41.3  | $9 \text{ H}_2 + 3 \text{ CO}_2 + \text{OCC}(=\text{O})\text{C}(=\text{O})\text{O} \rightarrow$<br>$\rightarrow 5 \text{ H}_2\text{O} + \text{OCC}(=\text{O})\text{O} + \text{CCC}=\text{O} + \text{C}=\text{O}$ |
| 90_10_34 | 16    | 0     | -181.7 | 41.1  | $4 \text{ CO}_2 + 10 \text{ H}_2 \rightarrow 6 \text{ H}_2\text{O} + \text{CCC}=\text{O} + \text{C}=\text{O}$                                                                                                    |
| 90_10_35 | 15    | 0     | -181.7 | 41.1  | $4 \text{ CO}_2 + 10 \text{ H}_2 \rightarrow 6 \text{ H}_2\text{O} + \text{CCC}=\text{O} + \text{C}=\text{O}$                                                                                                    |
| 90_10_36 | 14    | 0     | -175.7 | 41.1  | $9 \text{ H}_2 + 3 \text{ CO}_2 + \text{OCC}(=\text{O})\text{C}(=\text{O})\text{O} \rightarrow$<br>$\rightarrow 5 \text{ H}_2\text{O} + \text{OCC}(=\text{O})\text{O} + \text{CCC}=\text{O} + \text{C}=\text{O}$ |
| 90_10_37 | 16    | 0     | -181.7 | 41.7  | $4 \text{ CO}_2 + 10 \text{ H}_2 \rightarrow 6 \text{ H}_2\text{O} + \text{CCC}=\text{O} + \text{C}=\text{O}$                                                                                                    |
| 90_10_38 | 15    | 0     | -181.7 | 41.7  | $4 \text{ CO}_2 + 10 \text{ H}_2 \rightarrow 6 \text{ H}_2\text{O} + \text{CCC}=\text{O} + \text{C}=\text{O}$                                                                                                    |
| 90_10_39 | 14    | 0     | -175.7 | 41.7  | $9 \text{ H}_2 + 3 \text{ CO}_2 + \text{OCC}(=\text{O})\text{C}(=\text{O})\text{O} \rightarrow$<br>$\rightarrow 5 \text{ H}_2\text{O} + \text{OCC}(=\text{O})\text{O} + \text{CCC}=\text{O} + \text{C}=\text{O}$ |
| 90_10_40 | 16    | 0     | -181.7 | 41.7  | $4 \text{ CO}_2 + 10 \text{ H}_2 \rightarrow 6 \text{ H}_2\text{O} + \text{CCC}=\text{O} + \text{C}=\text{O}$                                                                                                    |
| 90_10_41 | 15    | 0     | -181.7 | 41.7  | $4 \text{ CO}_2 + 10 \text{ H}_2 \rightarrow 6 \text{ H}_2\text{O} + \text{CCC}=\text{O} + \text{C}=\text{O}$                                                                                                    |
| 90_10_42 | 14    | 0     | -175.7 | 41.7  | $9 \text{ H}_2 + 3 \text{ CO}_2 + \text{OCC}(=\text{O})\text{C}(=\text{O})\text{O} \rightarrow$<br>$\rightarrow 5 \text{ H}_2\text{O} + \text{OCC}(=\text{O})\text{O} + \text{CCC}=\text{O} + \text{C}=\text{O}$ |
| 90_18_73 | 21    | 1     | -207.3 | 45.7  | $6 \text{ CO}_2 + 12 \text{ H}_2 \rightarrow 6 \text{ H}_2\text{O} + \text{CCC}(=\text{O})\text{O} + \text{OCC}(=\text{O})\text{O} + \text{C}=\text{O}$                                                          |
| 90_18_76 | 21    | 1     | -207.3 | 45.7  | $6 \text{ CO}_2 + 12 \text{ H}_2 \rightarrow 6 \text{ H}_2\text{O} + \text{CCC}(=\text{O})\text{O} + \text{OCC}(=\text{O})\text{O} + \text{C}=\text{O}$                                                          |

| Label     | $n_M$ | $n_B$ | $E_C$  | $E_H$ | Net reaction                                                                                                                                                    |
|-----------|-------|-------|--------|-------|-----------------------------------------------------------------------------------------------------------------------------------------------------------------|
| 90_18_79  | 21    | 2     | -207.3 | 45.7  | $12 \text{ H}_2 + 6 \text{ CO}_2 \rightarrow 6 \text{ H}_2\text{O} + \text{OCC(=O)O} + \text{CCC(=O)O} + \text{C=O}$                                            |
| 90_18_82  | 21    | 1     | -207.3 | 45.5  | $6 \text{ CO}_2 + 12 \text{ H}_2 \rightarrow 6 \text{ H}_2\text{O} + \text{CCC(=O)O} + \text{OCC(=O)O} + \text{C=O}$                                            |
| 90_18_85  | 21    | 1     | -207.3 | 45.5  | $6 \text{ CO}_2 + 12 \text{ H}_2 \rightarrow 6 \text{ H}_2\text{O} + \text{CCC(=O)O} + \text{OCC(=O)O} + \text{C=O}$                                            |
| 90_18_88  | 21    | 2     | -207.3 | 45.5  | $12 \text{ H}_2 + 6 \text{ CO}_2 \rightarrow 6 \text{ H}_2\text{O} + \text{OCC(=O)O} + \text{CCC(=O)O} + \text{C=O}$                                            |
| 90_18_91  | 21    | 1     | -207.3 | 45.7  | $6 \text{ CO}_2 + 12 \text{ H}_2 \rightarrow 6 \text{ H}_2\text{O} + \text{CCC(=O)O} + \text{OCC(=O)O} + \text{C=O}$                                            |
| 90_18_94  | 21    | 1     | -207.3 | 45.7  | $6 \text{ CO}_2 + 12 \text{ H}_2 \rightarrow 6 \text{ H}_2\text{O} + \text{CCC(=O)O} + \text{OCC(=O)O} + \text{C=O}$                                            |
| 90_18_97  | 21    | 2     | -207.3 | 45.7  | $12 \text{ H}_2 + 6 \text{ CO}_2 \rightarrow 6 \text{ H}_2\text{O} + \text{OCC(=O)O} + \text{CCC(=O)O} + \text{C=O}$                                            |
| 90_18_100 | 21    | 1     | -207.3 | 45.5  | $6 \text{ CO}_2 + 12 \text{ H}_2 \rightarrow 6 \text{ H}_2\text{O} + \text{CCC(=O)O} + \text{OCC(=O)O} + \text{C=O}$                                            |
| 90_18_103 | 21    | 1     | -207.3 | 45.5  | $6 \text{ CO}_2 + 12 \text{ H}_2 \rightarrow 6 \text{ H}_2\text{O} + \text{CCC(=O)O} + \text{OCC(=O)O} + \text{C=O}$                                            |
| 90_18_106 | 21    | 2     | -207.3 | 45.5  | $12 \text{ H}_2 + 6 \text{ CO}_2 \rightarrow 6 \text{ H}_2\text{O} + \text{OCC(=O)O} + \text{CCC(=O)O} + \text{C=O}$                                            |
| 90_18_109 | 20    | 1     | -202.8 | 46.1  | $5 \text{ CO}_2 + 11 \text{ H}_2 + \text{CCC(=O)C(=O)O} \rightarrow$<br>$\rightarrow 5 \text{ H}_2\text{O} + 2 \text{ CCC(=O)O} + \text{OCC(=O)O} + \text{C=O}$ |
| 90_18_112 | 20    | 1     | -202.8 | 46.1  | $5 \text{ CO}_2 + 11 \text{ H}_2 + \text{CCC(=O)C(=O)O} \rightarrow$<br>$\rightarrow 5 \text{ H}_2\text{O} + 2 \text{ CCC(=O)O} + \text{OCC(=O)O} + \text{C=O}$ |
| 90_18_115 | 20    | 2     | -202.8 | 46.1  | $11 \text{ H}_2 + 5 \text{ CO}_2 + \text{CCC(=O)C(=O)O} \rightarrow$<br>$\rightarrow 5 \text{ H}_2\text{O} + \text{OCC(=O)O} + 2 \text{ CCC(=O)O} + \text{C=O}$ |
| 90_18_118 | 20    | 1     | -202.8 | 46.1  | $5 \text{ CO}_2 + 11 \text{ H}_2 + \text{CCC(=O)C(=O)O} \rightarrow$<br>$\rightarrow 5 \text{ H}_2\text{O} + 2 \text{ CCC(=O)O} + \text{OCC(=O)O} + \text{C=O}$ |

| Label     | $n_M$ | $n_B$ | $E_C$  | $E_H$ | Net reaction                                                                                                                                                    |
|-----------|-------|-------|--------|-------|-----------------------------------------------------------------------------------------------------------------------------------------------------------------|
| 90_18_121 | 20    | 1     | -202.8 | 46.1  | $5 \text{ CO}_2 + 11 \text{ H}_2 + \text{CCC(=O)C(=O)O} \rightarrow$<br>$\rightarrow 5 \text{ H}_2\text{O} + 2 \text{ CCC(=O)O} + \text{OCC(=O)O} + \text{C=O}$ |
| 90_18_124 | 20    | 2     | -202.8 | 46.1  | $11 \text{ H}_2 + 5 \text{ CO}_2 + \text{CCC(=O)C(=O)O} \rightarrow$<br>$\rightarrow 5 \text{ H}_2\text{O} + \text{OCC(=O)O} + 2 \text{ CCC(=O)O} + \text{C=O}$ |
| 90_21_1   | 9     | 0     | -82.5  | 45.4  | $2 \text{ CO}_2 + 4 \text{ H}_2 \rightarrow 2 \text{ H}_2\text{O} + \text{CC(=O)O}$                                                                             |
| 90_21_2   | 9     | 0     | -82.5  | 45.4  | $2 \text{ CO}_2 + 4 \text{ H}_2 \rightarrow 2 \text{ H}_2\text{O} + \text{CC(=O)O}$                                                                             |
| 90_21_3   | 9     | 0     | -82.5  | 45.1  | $2 \text{ CO}_2 + 4 \text{ H}_2 \rightarrow 2 \text{ H}_2\text{O} + \text{CC(=O)O}$                                                                             |
| 90_21_5   | 9     | 0     | -82.5  | 39.5  | $2 \text{ CO}_2 + 4 \text{ H}_2 \rightarrow 2 \text{ H}_2\text{O} + \text{CC(=O)O}$                                                                             |
| 90_48_1   | 21    | 1     | -207.3 | 45.7  | $6 \text{ CO}_2 + 12 \text{ H}_2 \rightarrow 6 \text{ H}_2\text{O} + \text{CCC(=O)O} + \text{OCC(=O)O} + \text{C=O}$                                            |
| 90_48_2   | 21    | 1     | -207.3 | 40.7  | $6 \text{ CO}_2 + 12 \text{ H}_2 \rightarrow 6 \text{ H}_2\text{O} + \text{CCC(=O)O} + \text{OCC(=O)O} + \text{C=O}$                                            |
| 90_48_3   | 21    | 1     | -207.3 | 40.7  | $6 \text{ CO}_2 + 12 \text{ H}_2 \rightarrow 6 \text{ H}_2\text{O} + \text{CCC(=O)O} + \text{OCC(=O)O} + \text{C=O}$                                            |
| 90_48_4   | 21    | 1     | -207.3 | 45.7  | $6 \text{ CO}_2 + 12 \text{ H}_2 \rightarrow 6 \text{ H}_2\text{O} + \text{CCC(=O)O} + \text{OCC(=O)O} + \text{C=O}$                                            |
| 90_48_5   | 21    | 1     | -207.3 | 40.7  | $6 \text{ CO}_2 + 12 \text{ H}_2 \rightarrow 6 \text{ H}_2\text{O} + \text{CCC(=O)O} + \text{OCC(=O)O} + \text{C=O}$                                            |
| 90_48_6   | 21    | 1     | -207.3 | 40.7  | $6 \text{ CO}_2 + 12 \text{ H}_2 \rightarrow 6 \text{ H}_2\text{O} + \text{CCC(=O)O} + \text{OCC(=O)O} + \text{C=O}$                                            |
| 90_48_7   | 21    | 2     | -207.3 | 45.7  | $12 \text{ H}_2 + 6 \text{ CO}_2 \rightarrow 6 \text{ H}_2\text{O} + \text{OCC(=O)O} + \text{CCC(=O)O} + \text{C=O}$                                            |
| 90_48_8   | 21    | 2     | -207.3 | 40.7  | $12 \text{ H}_2 + 6 \text{ CO}_2 \rightarrow 6 \text{ H}_2\text{O} + \text{OCC(=O)O} + \text{CCC(=O)O} + \text{C=O}$                                            |
| 90_48_9   | 21    | 2     | -207.3 | 40.7  | $6 \text{ CO}_2 + 12 \text{ H}_2 \rightarrow 6 \text{ H}_2\text{O} + \text{OCC(=O)O} + \text{CCC(=O)O} + \text{C=O}$                                            |
| 90_48_10  | 21    | 1     | -207.3 | 45.7  | $6 \text{ CO}_2 + 12 \text{ H}_2 \rightarrow 6 \text{ H}_2\text{O} + \text{CCC(=O)O} + \text{OCC(=O)O} + \text{C=O}$                                            |



| Label    | $n_M$ | $n_B$ | $E_C$  | $E_H$ | Net reaction                                                                                                         |
|----------|-------|-------|--------|-------|----------------------------------------------------------------------------------------------------------------------|
| 90_48_11 | 21    | 1     | -207.3 | 40.7  | $6 \text{ CO}_2 + 12 \text{ H}_2 \rightarrow 6 \text{ H}_2\text{O} + \text{CCC(=O)O} + \text{OCC(=O)O} + \text{C=O}$ |
| 90_48_12 | 21    | 1     | -207.3 | 40.7  | $6 \text{ CO}_2 + 12 \text{ H}_2 \rightarrow 6 \text{ H}_2\text{O} + \text{CCC(=O)O} + \text{OCC(=O)O} + \text{C=O}$ |
| 90_48_13 | 21    | 1     | -207.3 | 45.7  | $6 \text{ CO}_2 + 12 \text{ H}_2 \rightarrow 6 \text{ H}_2\text{O} + \text{CCC(=O)O} + \text{OCC(=O)O} + \text{C=O}$ |
| 90_48_14 | 21    | 1     | -207.3 | 40.7  | $6 \text{ CO}_2 + 12 \text{ H}_2 \rightarrow 6 \text{ H}_2\text{O} + \text{CCC(=O)O} + \text{OCC(=O)O} + \text{C=O}$ |
| 90_48_15 | 21    | 1     | -207.3 | 40.7  | $6 \text{ CO}_2 + 12 \text{ H}_2 \rightarrow 6 \text{ H}_2\text{O} + \text{CCC(=O)O} + \text{OCC(=O)O} + \text{C=O}$ |
| 90_48_16 | 21    | 2     | -207.3 | 45.7  | $12 \text{ H}_2 + 6 \text{ CO}_2 \rightarrow 6 \text{ H}_2\text{O} + \text{OCC(=O)O} + \text{CCC(=O)O} + \text{C=O}$ |
| 90_48_17 | 21    | 2     | -207.3 | 40.7  | $12 \text{ H}_2 + 6 \text{ CO}_2 \rightarrow 6 \text{ H}_2\text{O} + \text{OCC(=O)O} + \text{CCC(=O)O} + \text{C=O}$ |
| 90_48_18 | 21    | 2     | -207.3 | 40.7  | $6 \text{ CO}_2 + 12 \text{ H}_2 \rightarrow 6 \text{ H}_2\text{O} + \text{OCC(=O)O} + \text{CCC(=O)O} + \text{C=O}$ |
| 90_48_19 | 21    | 1     | -207.3 | 45.7  | $6 \text{ CO}_2 + 12 \text{ H}_2 \rightarrow 6 \text{ H}_2\text{O} + \text{CCC(=O)O} + \text{OCC(=O)O} + \text{C=O}$ |
| 90_48_20 | 21    | 1     | -207.3 | 40.7  | $6 \text{ CO}_2 + 12 \text{ H}_2 \rightarrow 6 \text{ H}_2\text{O} + \text{CCC(=O)O} + \text{OCC(=O)O} + \text{C=O}$ |
| 90_48_21 | 21    | 1     | -207.3 | 40.7  | $6 \text{ CO}_2 + 12 \text{ H}_2 \rightarrow 6 \text{ H}_2\text{O} + \text{CCC(=O)O} + \text{OCC(=O)O} + \text{C=O}$ |
| 90_48_22 | 21    | 1     | -207.3 | 45.7  | $6 \text{ CO}_2 + 12 \text{ H}_2 \rightarrow 6 \text{ H}_2\text{O} + \text{CCC(=O)O} + \text{OCC(=O)O} + \text{C=O}$ |
| 90_48_23 | 21    | 1     | -207.3 | 40.7  | $6 \text{ CO}_2 + 12 \text{ H}_2 \rightarrow 6 \text{ H}_2\text{O} + \text{CCC(=O)O} + \text{OCC(=O)O} + \text{C=O}$ |
| 90_48_24 | 21    | 1     | -207.3 | 40.7  | $6 \text{ CO}_2 + 12 \text{ H}_2 \rightarrow 6 \text{ H}_2\text{O} + \text{CCC(=O)O} + \text{OCC(=O)O} + \text{C=O}$ |
| 90_48_25 | 21    | 2     | -207.3 | 45.7  | $12 \text{ H}_2 + 6 \text{ CO}_2 \rightarrow 6 \text{ H}_2\text{O} + \text{OCC(=O)O} + \text{CCC(=O)O} + \text{C=O}$ |
| 90_48_26 | 21    | 2     | -207.3 | 40.7  | $12 \text{ H}_2 + 6 \text{ CO}_2 \rightarrow 6 \text{ H}_2\text{O} + \text{OCC(=O)O} + \text{CCC(=O)O} + \text{C=O}$ |
| 90_48_27 | 21    | 2     | -207.3 | 40.7  | $6 \text{ CO}_2 + 12 \text{ H}_2 \rightarrow 6 \text{ H}_2\text{O} + \text{OCC(=O)O} + \text{CCC(=O)O} + \text{C=O}$ |
| 90_48_28 | 21    | 1     | -207.3 | 44.6  | $6 \text{ CO}_2 + 12 \text{ H}_2 \rightarrow 6 \text{ H}_2\text{O} + \text{CCC(=O)O} + \text{OCC(=O)O} + \text{C=O}$ |









| Label     | $n_M$ | $n_B$ | $E_C$  | $E_H$ | Net reaction                                                                                                                                                                                                                   |
|-----------|-------|-------|--------|-------|--------------------------------------------------------------------------------------------------------------------------------------------------------------------------------------------------------------------------------|
| 90_48_101 | 21    | 1     | -207.3 | 40.4  | $6 \text{ CO}_2 + 12 \text{ H}_2 \rightarrow 6 \text{ H}_2\text{O} + \text{CCC}(=\text{O})\text{O} + \text{OCC}(=\text{O})\text{O} + \text{C}=\text{O}$                                                                        |
| 90_48_102 | 21    | 1     | -207.3 | 40.4  | $6 \text{ CO}_2 + 12 \text{ H}_2 \rightarrow 6 \text{ H}_2\text{O} + \text{CCC}(=\text{O})\text{O} + \text{OCC}(=\text{O})\text{O} + \text{C}=\text{O}$                                                                        |
| 90_48_103 | 20    | 1     | -207.3 | 45.5  | $6 \text{ CO}_2 + 12 \text{ H}_2 \rightarrow 6 \text{ H}_2\text{O} + \text{CCC}(=\text{O})\text{O} + \text{OCC}(=\text{O})\text{O} + \text{C}=\text{O}$                                                                        |
| 90_48_104 | 21    | 1     | -207.3 | 40.4  | $6 \text{ CO}_2 + 12 \text{ H}_2 \rightarrow 6 \text{ H}_2\text{O} + \text{CCC}(=\text{O})\text{O} + \text{OCC}(=\text{O})\text{O} + \text{C}=\text{O}$                                                                        |
| 90_48_105 | 21    | 1     | -207.3 | 40.4  | $6 \text{ CO}_2 + 12 \text{ H}_2 \rightarrow 6 \text{ H}_2\text{O} + \text{CCC}(=\text{O})\text{O} + \text{OCC}(=\text{O})\text{O} + \text{C}=\text{O}$                                                                        |
| 90_48_106 | 20    | 2     | -207.3 | 45.5  | $12 \text{ H}_2 + 6 \text{ CO}_2 \rightarrow 6 \text{ H}_2\text{O} + \text{OCC}(=\text{O})\text{O} + \text{CCC}(=\text{O})\text{O} + \text{C}=\text{O}$                                                                        |
| 90_48_107 | 21    | 2     | -207.3 | 40.4  | $12 \text{ H}_2 + 6 \text{ CO}_2 \rightarrow 6 \text{ H}_2\text{O} + \text{OCC}(=\text{O})\text{O} + \text{CCC}(=\text{O})\text{O} + \text{C}=\text{O}$                                                                        |
| 90_48_108 | 21    | 2     | -207.3 | 40.4  | $6 \text{ CO}_2 + 12 \text{ H}_2 \rightarrow 6 \text{ H}_2\text{O} + \text{OCC}(=\text{O})\text{O} + \text{CCC}(=\text{O})\text{O} + \text{C}=\text{O}$                                                                        |
| 90_48_109 | 19    | 1     | -202.8 | 46.1  | $5 \text{ CO}_2 + 11 \text{ H}_2 + \text{CCC}(=\text{O})\text{C}(=\text{O})\text{O} \rightarrow$<br>$\rightarrow 5 \text{ H}_2\text{O} + 2 \text{ CCC}(=\text{O})\text{O} + \text{OCC}(=\text{O})\text{O} + \text{C}=\text{O}$ |
| 90_48_110 | 20    | 1     | -207.3 | 41.1  | $6 \text{ CO}_2 + 12 \text{ H}_2 \rightarrow 6 \text{ H}_2\text{O} + \text{CCC}(=\text{O})\text{O} + \text{OCC}(=\text{O})\text{O} + \text{C}=\text{O}$                                                                        |
| 90_48_111 | 20    | 1     | -207.3 | 41.1  | $6 \text{ CO}_2 + 12 \text{ H}_2 \rightarrow 6 \text{ H}_2\text{O} + \text{CCC}(=\text{O})\text{O} + \text{OCC}(=\text{O})\text{O} + \text{C}=\text{O}$                                                                        |
| 90_48_112 | 19    | 1     | -202.8 | 46.1  | $5 \text{ CO}_2 + 11 \text{ H}_2 + \text{CCC}(=\text{O})\text{C}(=\text{O})\text{O} \rightarrow$<br>$\rightarrow 5 \text{ H}_2\text{O} + 2 \text{ CCC}(=\text{O})\text{O} + \text{OCC}(=\text{O})\text{O} + \text{C}=\text{O}$ |
| 90_48_113 | 20    | 1     | -207.3 | 41.1  | $6 \text{ CO}_2 + 12 \text{ H}_2 \rightarrow 6 \text{ H}_2\text{O} + \text{CCC}(=\text{O})\text{O} + \text{OCC}(=\text{O})\text{O} + \text{C}=\text{O}$                                                                        |
| 90_48_114 | 20    | 1     | -207.3 | 41.1  | $6 \text{ CO}_2 + 12 \text{ H}_2 \rightarrow 6 \text{ H}_2\text{O} + \text{CCC}(=\text{O})\text{O} + \text{OCC}(=\text{O})\text{O} + \text{C}=\text{O}$                                                                        |
| 90_48_115 | 19    | 2     | -202.8 | 46.1  | $11 \text{ H}_2 + 5 \text{ CO}_2 + \text{CCC}(=\text{O})\text{C}(=\text{O})\text{O} \rightarrow$<br>$\rightarrow 5 \text{ H}_2\text{O} + \text{OCC}(=\text{O})\text{O} + 2 \text{ CCC}(=\text{O})\text{O} + \text{C}=\text{O}$ |

| Label     | $n_M$ | $n_B$ | $E_C$  | $E_H$ | Net reaction                                                                                                                                                                                                                   |
|-----------|-------|-------|--------|-------|--------------------------------------------------------------------------------------------------------------------------------------------------------------------------------------------------------------------------------|
| 90_48_116 | 20    | 2     | -207.3 | 41.1  | $12 \text{ H}_2 + 6 \text{ CO}_2 \rightarrow 6 \text{ H}_2\text{O} + \text{OCC}(=\text{O})\text{O} + \text{CCC}(=\text{O})\text{O} + \text{C}=\text{O}$                                                                        |
| 90_48_117 | 20    | 2     | -207.3 | 41.1  | $6 \text{ CO}_2 + 12 \text{ H}_2 \rightarrow 6 \text{ H}_2\text{O} + \text{OCC}(=\text{O})\text{O} + \text{CCC}(=\text{O})\text{O} + \text{C}=\text{O}$                                                                        |
| 90_48_118 | 19    | 1     | -202.8 | 46.1  | $5 \text{ CO}_2 + 11 \text{ H}_2 + \text{CCC}(=\text{O})\text{C}(=\text{O})\text{O} \rightarrow$<br>$\rightarrow 5 \text{ H}_2\text{O} + 2 \text{ CCC}(=\text{O})\text{O} + \text{OCC}(=\text{O})\text{O} + \text{C}=\text{O}$ |
| 90_48_119 | 20    | 1     | -207.3 | 41.1  | $6 \text{ CO}_2 + 12 \text{ H}_2 \rightarrow 6 \text{ H}_2\text{O} + \text{CCC}(=\text{O})\text{O} + \text{OCC}(=\text{O})\text{O} + \text{C}=\text{O}$                                                                        |
| 90_48_120 | 20    | 1     | -207.3 | 41.1  | $6 \text{ CO}_2 + 12 \text{ H}_2 \rightarrow 6 \text{ H}_2\text{O} + \text{CCC}(=\text{O})\text{O} + \text{OCC}(=\text{O})\text{O} + \text{C}=\text{O}$                                                                        |
| 90_48_121 | 19    | 1     | -202.8 | 46.1  | $5 \text{ CO}_2 + 11 \text{ H}_2 + \text{CCC}(=\text{O})\text{C}(=\text{O})\text{O} \rightarrow$<br>$\rightarrow 5 \text{ H}_2\text{O} + 2 \text{ CCC}(=\text{O})\text{O} + \text{OCC}(=\text{O})\text{O} + \text{C}=\text{O}$ |
| 90_48_122 | 20    | 1     | -207.3 | 41.1  | $6 \text{ CO}_2 + 12 \text{ H}_2 \rightarrow 6 \text{ H}_2\text{O} + \text{CCC}(=\text{O})\text{O} + \text{OCC}(=\text{O})\text{O} + \text{C}=\text{O}$                                                                        |
| 90_48_123 | 20    | 1     | -207.3 | 41.1  | $6 \text{ CO}_2 + 12 \text{ H}_2 \rightarrow 6 \text{ H}_2\text{O} + \text{CCC}(=\text{O})\text{O} + \text{OCC}(=\text{O})\text{O} + \text{C}=\text{O}$                                                                        |
| 90_48_124 | 19    | 2     | -202.8 | 46.1  | $11 \text{ H}_2 + 5 \text{ CO}_2 + \text{CCC}(=\text{O})\text{C}(=\text{O})\text{O} \rightarrow$<br>$\rightarrow 5 \text{ H}_2\text{O} + \text{OCC}(=\text{O})\text{O} + 2 \text{ CCC}(=\text{O})\text{O} + \text{C}=\text{O}$ |
| 90_48_125 | 20    | 2     | -207.3 | 41.1  | $12 \text{ H}_2 + 6 \text{ CO}_2 \rightarrow 6 \text{ H}_2\text{O} + \text{OCC}(=\text{O})\text{O} + \text{CCC}(=\text{O})\text{O} + \text{C}=\text{O}$                                                                        |
| 90_48_126 | 20    | 2     | -207.3 | 41.1  | $6 \text{ CO}_2 + 12 \text{ H}_2 \rightarrow 6 \text{ H}_2\text{O} + \text{OCC}(=\text{O})\text{O} + \text{CCC}(=\text{O})\text{O} + \text{C}=\text{O}$                                                                        |
| 90_49_1   | 3     | 0     | -23.4  | 36.4  | $2 \text{ H}_2 + \text{CO}_2 \rightarrow \text{H}_2\text{O} + \text{C}=\text{O}$                                                                                                                                               |
| 90_65_1   | 10    | 0     | -105.9 | 38.9  | $3 \text{ CO}_2 + 6 \text{ H}_2 \rightarrow 3 \text{ H}_2\text{O} + \text{CC}(=\text{O})\text{O} + \text{C}=\text{O}$                                                                                                          |
| 90_65_2   | 10    | 0     | -105.9 | 38.9  | $6 \text{ H}_2 + 3 \text{ CO}_2 \rightarrow 3 \text{ H}_2\text{O} + \text{CC}(=\text{O})\text{O} + \text{C}=\text{O}$                                                                                                          |
| 90_65_3   | 10    | 0     | -105.9 | 37.2  | $3 \text{ CO}_2 + 6 \text{ H}_2 \rightarrow 3 \text{ H}_2\text{O} + \text{CC}(=\text{O})\text{O} + \text{C}=\text{O}$                                                                                                          |

| Label    | $n_M$ | $n_B$ | $E_C$  | $E_H$ | Net reaction                                                                                                          |
|----------|-------|-------|--------|-------|-----------------------------------------------------------------------------------------------------------------------|
| 90_65_4  | 10    | 0     | -105.9 | 37.2  | $6 \text{ H}_2 + 3 \text{ CO}_2 \rightarrow 3 \text{ H}_2\text{O} + \text{CC}(=\text{O})\text{O} + \text{C}=\text{O}$ |
| 90_65_5  | 10    | 0     | -105.9 | 36.5  | $3 \text{ CO}_2 + 6 \text{ H}_2 \rightarrow 3 \text{ H}_2\text{O} + \text{CC}(=\text{O})\text{O} + \text{C}=\text{O}$ |
| 90_65_6  | 10    | 0     | -105.9 | 36.5  | $6 \text{ H}_2 + 3 \text{ CO}_2 \rightarrow 3 \text{ H}_2\text{O} + \text{CC}(=\text{O})\text{O} + \text{C}=\text{O}$ |
| 90_65_7  | 10    | 0     | -105.9 | 35.3  | $3 \text{ CO}_2 + 6 \text{ H}_2 \rightarrow 3 \text{ H}_2\text{O} + \text{CC}(=\text{O})\text{O} + \text{C}=\text{O}$ |
| 90_65_8  | 10    | 0     | -105.9 | 35.3  | $6 \text{ H}_2 + 3 \text{ CO}_2 \rightarrow 3 \text{ H}_2\text{O} + \text{CC}(=\text{O})\text{O} + \text{C}=\text{O}$ |
| 90_65_9  | 10    | 0     | -105.9 | 33.7  | $3 \text{ CO}_2 + 6 \text{ H}_2 \rightarrow 3 \text{ H}_2\text{O} + \text{CC}(=\text{O})\text{O} + \text{C}=\text{O}$ |
| 90_65_10 | 10    | 0     | -105.9 | 33.7  | $6 \text{ H}_2 + 3 \text{ CO}_2 \rightarrow 3 \text{ H}_2\text{O} + \text{CC}(=\text{O})\text{O} + \text{C}=\text{O}$ |
| 90_65_11 | 10    | 0     | -105.9 | 33.0  | $3 \text{ CO}_2 + 6 \text{ H}_2 \rightarrow 3 \text{ H}_2\text{O} + \text{CC}(=\text{O})\text{O} + \text{C}=\text{O}$ |
| 90_65_12 | 10    | 0     | -105.9 | 33.0  | $6 \text{ H}_2 + 3 \text{ CO}_2 \rightarrow 3 \text{ H}_2\text{O} + \text{CC}(=\text{O})\text{O} + \text{C}=\text{O}$ |
| 90_69_1  | 4     | 1     | -13.8  | 31.3  | $2 \text{ CO}_2 + 2 \text{ H}_2 \rightarrow \text{O}=\text{CC}(=\text{O})\text{O} + \text{O}$                         |
| 90_81_1  | 7     | 0     | -82.5  | 30.5  | $2 \text{ CO}_2 + 4 \text{ H}_2 \rightarrow 2 \text{ H}_2\text{O} + \text{CC}(=\text{O})\text{O}$                     |
| 90_81_2  | 7     | 0     | -82.5  | 28.9  | $2 \text{ CO}_2 + 4 \text{ H}_2 \rightarrow 2 \text{ H}_2\text{O} + \text{CC}(=\text{O})\text{O}$                     |
| 90_81_3  | 7     | 0     | -82.5  | 28.2  | $2 \text{ CO}_2 + 4 \text{ H}_2 \rightarrow 2 \text{ H}_2\text{O} + \text{CC}(=\text{O})\text{O}$                     |
| 90_87_1  | 7     | 0     | -97.1  | 32.9  | $2 \text{ CO}_2 + 5 \text{ H}_2 \rightarrow 3 \text{ H}_2\text{O} + \text{CC}=\text{O}$                               |
| 90_87_2  | 7     | 0     | -97.1  | 32.9  | $2 \text{ CO}_2 + 5 \text{ H}_2 \rightarrow 3 \text{ H}_2\text{O} + \text{CC}=\text{O}$                               |
| 90_87_3  | 7     | 0     | -97.1  | 32.9  | $5 \text{ H}_2 + 2 \text{ CO}_2 \rightarrow 3 \text{ H}_2\text{O} + \text{CC}=\text{O}$                               |
| 90_99_1  | 9     | 0     | -97.1  | 36.1  | $2 \text{ CO}_2 + 5 \text{ H}_2 \rightarrow 3 \text{ H}_2\text{O} + \text{CC}=\text{O}$                               |
| 90_99_3  | 9     | 0     | -97.1  | 36.1  | $2 \text{ CO}_2 + 5 \text{ H}_2 \rightarrow 3 \text{ H}_2\text{O} + \text{CC}=\text{O}$                               |



| Label     | $n_M$ | $n_B$ | $E_C$  | $E_H$ | Net reaction                                                                                                                           |
|-----------|-------|-------|--------|-------|----------------------------------------------------------------------------------------------------------------------------------------|
| 90_99_5   | 9     | 0     | -97.1  | 36.1  | $5 \text{ H}_2 + 2 \text{ CO}_2 \rightarrow 3 \text{ H}_2\text{O} + \text{CC}=\text{O}$                                                |
| 90_99_7   | 9     | 0     | -97.1  | 33.5  | $2 \text{ CO}_2 + 5 \text{ H}_2 \rightarrow 3 \text{ H}_2\text{O} + \text{CC}=\text{O}$                                                |
| 90_99_8   | 9     | 0     | -97.1  | 32.1  | $2 \text{ CO}_2 + 5 \text{ H}_2 \rightarrow 3 \text{ H}_2\text{O} + \text{CC}=\text{O}$                                                |
| 90_99_9   | 9     | 0     | -97.1  | 31.8  | $2 \text{ CO}_2 + 5 \text{ H}_2 \rightarrow 3 \text{ H}_2\text{O} + \text{CC}=\text{O}$                                                |
| 90_99_10  | 9     | 0     | -97.1  | 30.5  | $2 \text{ CO}_2 + 5 \text{ H}_2 \rightarrow 3 \text{ H}_2\text{O} + \text{CC}=\text{O}$                                                |
| 90_99_11  | 9     | 0     | -97.1  | 31.1  | $5 \text{ H}_2 + 2 \text{ CO}_2 \rightarrow 3 \text{ H}_2\text{O} + \text{CC}=\text{O}$                                                |
| 90_99_12  | 9     | 0     | -97.1  | 29.8  | $5 \text{ H}_2 + 2 \text{ CO}_2 \rightarrow 3 \text{ H}_2\text{O} + \text{CC}=\text{O}$                                                |
| 90_107_1  | 12    | 1     | -111.8 | 38.7  | $4 \text{ CO}_2 + 7 \text{ H}_2 \rightarrow 4 \text{ H}_2\text{O} + \text{CC}(\text{C}(=\text{O})\text{C}(=\text{O})\text{O})\text{O}$ |
| 90_107_2  | 12    | 1     | -111.8 | 38.7  | $4 \text{ CO}_2 + 7 \text{ H}_2 \rightarrow 4 \text{ H}_2\text{O} + \text{CC}(\text{C}(=\text{O})\text{C}(=\text{O})\text{O})\text{O}$ |
| 90_107_3  | 12    | 1     | -111.8 | 38.7  | $4 \text{ CO}_2 + 7 \text{ H}_2 \rightarrow 4 \text{ H}_2\text{O} + \text{CC}(\text{C}(=\text{O})\text{C}(=\text{O})\text{O})\text{O}$ |
| 90_107_4  | 11    | 1     | -108.1 | 38.7  | $3 \text{ CO}_2 + 6 \text{ H}_2 \rightarrow 3 \text{ H}_2\text{O} + \text{OC}(=\text{O})\text{C}(\text{O})\text{C}$                    |
| 90_107_5  | 12    | 1     | -111.8 | 38.7  | $4 \text{ CO}_2 + 7 \text{ H}_2 \rightarrow 4 \text{ H}_2\text{O} + \text{CC}(\text{C}(=\text{O})\text{C}(=\text{O})\text{O})\text{O}$ |
| 90_107_6  | 12    | 1     | -111.8 | 38.7  | $4 \text{ CO}_2 + 7 \text{ H}_2 \rightarrow 4 \text{ H}_2\text{O} + \text{CC}(\text{C}(=\text{O})\text{C}(=\text{O})\text{O})\text{O}$ |
| 90_107_7  | 12    | 1     | -111.8 | 38.7  | $4 \text{ CO}_2 + 7 \text{ H}_2 \rightarrow 4 \text{ H}_2\text{O} + \text{CC}(\text{C}(=\text{O})\text{C}(=\text{O})\text{O})\text{O}$ |
| 90_107_8  | 11    | 1     | -108.1 | 38.7  | $3 \text{ CO}_2 + 6 \text{ H}_2 \rightarrow 3 \text{ H}_2\text{O} + \text{OC}(=\text{O})\text{C}(\text{O})\text{C}$                    |
| 90_107_9  | 12    | 1     | -111.8 | 38.7  | $4 \text{ CO}_2 + 7 \text{ H}_2 \rightarrow 4 \text{ H}_2\text{O} + \text{CC}(\text{C}(=\text{O})\text{C}(=\text{O})\text{O})\text{O}$ |
| 90_107_10 | 12    | 1     | -111.8 | 38.7  | $4 \text{ CO}_2 + 7 \text{ H}_2 \rightarrow 4 \text{ H}_2\text{O} + \text{CC}(\text{C}(=\text{O})\text{C}(=\text{O})\text{O})\text{O}$ |
| 90_107_11 | 12    | 1     | -111.8 | 38.7  | $4 \text{ CO}_2 + 7 \text{ H}_2 \rightarrow 4 \text{ H}_2\text{O} + \text{CC}(\text{C}(=\text{O})\text{C}(=\text{O})\text{O})\text{O}$ |

| Label     | $n_M$ | $n_B$ | $E_C$  | $E_H$ | Net reaction                                                                                                                                                                                                                                          |
|-----------|-------|-------|--------|-------|-------------------------------------------------------------------------------------------------------------------------------------------------------------------------------------------------------------------------------------------------------|
| 90_107_12 | 11    | 1     | -108.1 | 38.7  | $3 \text{ CO}_2 + 6 \text{ H}_2 \rightarrow 3 \text{ H}_2\text{O} + \text{OC}(=\text{O})\text{C}(\text{O})\text{C}$                                                                                                                                   |
| 90_115_1  | 13    | 0     | -107.2 | 38.9  | $4 \text{ CO}_2 + 7 \text{ H}_2 + \text{OCC}(\text{C}(=\text{O})\text{O})\text{O} \rightarrow$<br>$\rightarrow \text{O}=\text{CC}(\text{C}(=\text{O})\text{O})\text{O} + 4 \text{ H}_2\text{O} + 2 \text{ C}=\text{O} + \text{CC}(=\text{O})\text{O}$ |
| 90_115_2  | 13    | 0     | -129.3 | 37.3  | $4 \text{ CO}_2 + 8 \text{ H}_2 \rightarrow 4 \text{ H}_2\text{O} + 2 \text{ C}=\text{O} + \text{CC}(=\text{O})\text{O}$                                                                                                                              |
| 90_115_3  | 12    | 0     | -123.3 | 36.6  | $3 \text{ CO}_2 + 7 \text{ H}_2 + \text{OCC}(=\text{O})\text{C}(=\text{O})\text{O} \rightarrow$<br>$\rightarrow \text{OCC}(=\text{O})\text{O} + 3 \text{ H}_2\text{O} + 2 \text{ C}=\text{O} + \text{CC}(=\text{O})\text{O}$                          |
| 90_116_1  | 6     | 0     | -46.8  | 38.7  | $2 \text{ CO}_2 + 4 \text{ H}_2 \rightarrow 2 \text{ H}_2\text{O} + 2 \text{ C}=\text{O}$                                                                                                                                                             |
| 90_119_1  | 7     | 0     | -82.5  | 45.4  | $2 \text{ CO}_2 + 4 \text{ H}_2 \rightarrow 2 \text{ H}_2\text{O} + \text{CC}(=\text{O})\text{O}$                                                                                                                                                     |
| 90_119_2  | 7     | 0     | -82.5  | 45.4  | $4 \text{ H}_2 + 2 \text{ CO}_2 \rightarrow \text{CC}(=\text{O})\text{O} + 2 \text{ H}_2\text{O}$                                                                                                                                                     |
| 90_119_3  | 7     | 0     | -82.5  | 45.1  | $2 \text{ CO}_2 + 4 \text{ H}_2 \rightarrow 2 \text{ H}_2\text{O} + \text{CC}(=\text{O})\text{O}$                                                                                                                                                     |
| 90_119_4  | 7     | 0     | -82.5  | 43.9  | $2 \text{ CO}_2 + 4 \text{ H}_2 \rightarrow \text{CC}(=\text{O})\text{O} + 2 \text{ H}_2\text{O}$                                                                                                                                                     |
| 90_119_5  | 7     | 0     | -82.5  | 39.5  | $4 \text{ H}_2 + 2 \text{ CO}_2 \rightarrow \text{CC}(=\text{O})\text{O} + 2 \text{ H}_2\text{O}$                                                                                                                                                     |
| 90_119_6  | 7     | 0     | -82.5  | 45.7  | $2 \text{ CO}_2 + 4 \text{ H}_2 \rightarrow \text{CC}(=\text{O})\text{O} + 2 \text{ H}_2\text{O}$                                                                                                                                                     |
| 90_130_1  | 13    | 0     | -143.9 | 38.8  | $4 \text{ CO}_2 + 9 \text{ H}_2 \rightarrow 5 \text{ H}_2\text{O} + 2 \text{ C}=\text{O} + \text{CC}=\text{O}$                                                                                                                                        |
| 90_130_2  | 12    | 0     | -143.9 | 38.8  | $4 \text{ CO}_2 + 9 \text{ H}_2 \rightarrow 5 \text{ H}_2\text{O} + 2 \text{ C}=\text{O} + \text{CC}=\text{O}$                                                                                                                                        |
| 90_130_3  | 11    | 0     | -137.9 | 38.8  | $3 \text{ CO}_2 + 8 \text{ H}_2 + \text{OCC}(=\text{O})\text{C}(=\text{O})\text{O} \rightarrow$<br>$\rightarrow \text{OCC}(=\text{O})\text{O} + 4 \text{ H}_2\text{O} + 2 \text{ C}=\text{O} + \text{CC}=\text{O}$                                    |
| 90_130_4  | 13    | 0     | -133.0 | 38.8  | $4 \text{ CO}_2 + 8 \text{ H}_2 \rightarrow 4 \text{ H}_2\text{O} + \text{OC}=\text{O} + \text{CC}=\text{O} + \text{C}=\text{O}$                                                                                                                      |

| Label     | $n_M$ | $n_B$ | $E_C$  | $E_H$ | Net reaction                                                                                                                                                                                                                         |
|-----------|-------|-------|--------|-------|--------------------------------------------------------------------------------------------------------------------------------------------------------------------------------------------------------------------------------------|
| 90_130_5  | 12    | 0     | -133.0 | 38.8  | $4 \text{ CO}_2 + 8 \text{ H}_2 \rightarrow 4 \text{ H}_2\text{O} + \text{OC}=\text{O} + \text{CC}=\text{O} + \text{C}=\text{O}$                                                                                                     |
| 90_130_6  | 11    | 0     | -127.1 | 38.8  | $3 \text{ CO}_2 + 7 \text{ H}_2 + \text{OCC}(=\text{O})\text{C}(=\text{O})\text{O} \rightarrow$<br>$\rightarrow 3 \text{ H}_2\text{O} + \text{OCC}(=\text{O})\text{O} + \text{OC}=\text{O} + \text{CC}=\text{O} + \text{C}=\text{O}$ |
| 90_134_1  | 12    | 1     | -100.9 | 46.8  | $5 \text{ CO}_2 + 7 \text{ H}_2 \rightarrow \text{OC}(=\text{O})\text{CC}(=\text{O})\text{C}(=\text{O})\text{O} + 4 \text{ H}_2\text{O} + \text{C}=\text{O}$                                                                         |
| 90_134_2  | 12    | 1     | -100.9 | 45.1  | $5 \text{ CO}_2 + 7 \text{ H}_2 \rightarrow \text{OC}(=\text{O})\text{CC}(=\text{O})\text{C}(=\text{O})\text{O} + 4 \text{ H}_2\text{O} + \text{C}=\text{O}$                                                                         |
| 90_134_3  | 12    | 1     | -100.9 | 44.4  | $5 \text{ CO}_2 + 7 \text{ H}_2 \rightarrow \text{OC}(=\text{O})\text{CC}(=\text{O})\text{C}(=\text{O})\text{O} + 4 \text{ H}_2\text{O} + \text{C}=\text{O}$                                                                         |
| 90_134_4  | 12    | 1     | -90.1  | 46.8  | $5 \text{ CO}_2 + 6 \text{ H}_2 \rightarrow 3 \text{ H}_2\text{O} + \text{OC}(=\text{O})\text{CC}(=\text{O})\text{C}(=\text{O})\text{O} + \text{OC}=\text{O}$                                                                        |
| 90_134_5  | 12    | 1     | -90.1  | 45.1  | $5 \text{ CO}_2 + 6 \text{ H}_2 \rightarrow 3 \text{ H}_2\text{O} + \text{OC}(=\text{O})\text{CC}(=\text{O})\text{C}(=\text{O})\text{O} + \text{OC}=\text{O}$                                                                        |
| 90_134_6  | 12    | 1     | -90.1  | 44.4  | $5 \text{ CO}_2 + 6 \text{ H}_2 \rightarrow 3 \text{ H}_2\text{O} + \text{OC}(=\text{O})\text{CC}(=\text{O})\text{C}(=\text{O})\text{O} + \text{OC}=\text{O}$                                                                        |
| 90_134_7  | 12    | 1     | -100.9 | 46.8  | $5 \text{ CO}_2 + 7 \text{ H}_2 \rightarrow \text{OC}(=\text{O})\text{CC}(=\text{O})\text{C}(=\text{O})\text{O} + 4 \text{ H}_2\text{O} + \text{C}=\text{O}$                                                                         |
| 90_134_8  | 12    | 1     | -100.9 | 45.1  | $5 \text{ CO}_2 + 7 \text{ H}_2 \rightarrow \text{OC}(=\text{O})\text{CC}(=\text{O})\text{C}(=\text{O})\text{O} + 4 \text{ H}_2\text{O} + \text{C}=\text{O}$                                                                         |
| 90_134_9  | 12    | 1     | -100.9 | 44.4  | $5 \text{ CO}_2 + 7 \text{ H}_2 \rightarrow \text{OC}(=\text{O})\text{CC}(=\text{O})\text{C}(=\text{O})\text{O} + 4 \text{ H}_2\text{O} + \text{C}=\text{O}$                                                                         |
| 90_134_10 | 12    | 1     | -100.9 | 46.8  | $5 \text{ CO}_2 + 7 \text{ H}_2 \rightarrow \text{OC}(=\text{O})\text{CC}(=\text{O})\text{C}(=\text{O})\text{O} + 4 \text{ H}_2\text{O} + \text{C}=\text{O}$                                                                         |
| 90_134_11 | 12    | 1     | -100.9 | 45.1  | $5 \text{ CO}_2 + 7 \text{ H}_2 \rightarrow \text{OC}(=\text{O})\text{CC}(=\text{O})\text{C}(=\text{O})\text{O} + 4 \text{ H}_2\text{O} + \text{C}=\text{O}$                                                                         |
| 90_134_12 | 12    | 1     | -100.9 | 44.4  | $5 \text{ CO}_2 + 7 \text{ H}_2 \rightarrow \text{OC}(=\text{O})\text{CC}(=\text{O})\text{C}(=\text{O})\text{O} + 4 \text{ H}_2\text{O} + \text{C}=\text{O}$                                                                         |
| 90_134_13 | 12    | 1     | -100.9 | 46.8  | $5 \text{ CO}_2 + 7 \text{ H}_2 \rightarrow \text{OC}(=\text{O})\text{CC}(=\text{O})\text{C}(=\text{O})\text{O} + 4 \text{ H}_2\text{O} + \text{C}=\text{O}$                                                                         |
| 90_134_14 | 12    | 1     | -100.9 | 45.1  | $5 \text{ CO}_2 + 7 \text{ H}_2 \rightarrow \text{OC}(=\text{O})\text{CC}(=\text{O})\text{C}(=\text{O})\text{O} + 4 \text{ H}_2\text{O} + \text{C}=\text{O}$                                                                         |
| 90_134_15 | 12    | 1     | -100.9 | 44.4  | $5 \text{ CO}_2 + 7 \text{ H}_2 \rightarrow \text{OC}(=\text{O})\text{CC}(=\text{O})\text{C}(=\text{O})\text{O} + 4 \text{ H}_2\text{O} + \text{C}=\text{O}$                                                                         |

| Label     | $n_M$ | $n_B$ | $E_C$  | $E_H$ | Net reaction                                                                                                                                                  |
|-----------|-------|-------|--------|-------|---------------------------------------------------------------------------------------------------------------------------------------------------------------|
| 90_134_16 | 12    | 1     | -90.1  | 46.8  | $5 \text{ CO}_2 + 6 \text{ H}_2 \rightarrow 3 \text{ H}_2\text{O} + \text{OC}(=\text{O})\text{CC}(=\text{O})\text{C}(=\text{O})\text{O} + \text{OC}=\text{O}$ |
| 90_134_17 | 12    | 1     | -90.1  | 45.1  | $5 \text{ CO}_2 + 6 \text{ H}_2 \rightarrow 3 \text{ H}_2\text{O} + \text{OC}(=\text{O})\text{CC}(=\text{O})\text{C}(=\text{O})\text{O} + \text{OC}=\text{O}$ |
| 90_134_18 | 12    | 1     | -90.1  | 44.4  | $5 \text{ CO}_2 + 6 \text{ H}_2 \rightarrow 3 \text{ H}_2\text{O} + \text{OC}(=\text{O})\text{CC}(=\text{O})\text{C}(=\text{O})\text{O} + \text{OC}=\text{O}$ |
| 90_137_1  | 3     | 0     | -23.4  | 37.1  | $\text{CO}_2 + 2 \text{ H}_2 \rightarrow \text{H}_2\text{O} + \text{C}=\text{O}$                                                                              |
| 90_145_1  | 10    | 0     | -110.9 | 48.6  | $3 \text{ CO}_2 + 6 \text{ H}_2 \rightarrow 4 \text{ H}_2\text{O} + \text{OC}(=\text{O})\text{C}=\text{C}$                                                    |
| 90_145_2  | 10    | 0     | -110.9 | 48.6  | $3 \text{ CO}_2 + 6 \text{ H}_2 \rightarrow 4 \text{ H}_2\text{O} + \text{OC}(=\text{O})\text{C}=\text{C}$                                                    |
| 90_145_3  | 10    | 0     | -110.9 | 48.6  | $3 \text{ CO}_2 + 6 \text{ H}_2 \rightarrow 4 \text{ H}_2\text{O} + \text{OC}(=\text{O})\text{C}=\text{C}$                                                    |
| 90_145_4  | 10    | 1     | -110.9 | 40.5  | $3 \text{ CO}_2 + 6 \text{ H}_2 \rightarrow \text{OC}(=\text{O})\text{C}=\text{C} + 4 \text{ H}_2\text{O}$                                                    |
| 90_145_5  | 10    | 1     | -110.9 | 40.5  | $3 \text{ CO}_2 + 6 \text{ H}_2 \rightarrow \text{OC}(=\text{O})\text{C}=\text{C} + 4 \text{ H}_2\text{O}$                                                    |
| 90_145_6  | 10    | 1     | -110.9 | 40.5  | $6 \text{ H}_2 + 3 \text{ CO}_2 \rightarrow \text{OC}(=\text{O})\text{C}=\text{C} + 4 \text{ H}_2\text{O}$                                                    |
| 90_145_7  | 10    | 1     | -110.9 | 37.8  | $3 \text{ CO}_2 + 6 \text{ H}_2 \rightarrow \text{OC}(=\text{O})\text{C}=\text{C} + 4 \text{ H}_2\text{O}$                                                    |
| 90_145_8  | 10    | 1     | -110.9 | 36.2  | $3 \text{ CO}_2 + 6 \text{ H}_2 \rightarrow \text{OC}(=\text{O})\text{C}=\text{C} + 4 \text{ H}_2\text{O}$                                                    |
| 90_145_9  | 10    | 1     | -110.9 | 35.5  | $6 \text{ H}_2 + 3 \text{ CO}_2 \rightarrow \text{OC}(=\text{O})\text{C}=\text{C} + 4 \text{ H}_2\text{O}$                                                    |
| 90_145_10 | 10    | 0     | -110.9 | 38.9  | $3 \text{ CO}_2 + 6 \text{ H}_2 \rightarrow 4 \text{ H}_2\text{O} + \text{OC}(=\text{O})\text{C}=\text{C}$                                                    |
| 90_145_11 | 10    | 0     | -110.9 | 37.2  | $3 \text{ CO}_2 + 6 \text{ H}_2 \rightarrow 4 \text{ H}_2\text{O} + \text{OC}(=\text{O})\text{C}=\text{C}$                                                    |
| 90_145_12 | 10    | 0     | -110.9 | 36.5  | $6 \text{ H}_2 + 3 \text{ CO}_2 \rightarrow 4 \text{ H}_2\text{O} + \text{OC}(=\text{O})\text{C}=\text{C}$                                                    |
| 90_145_13 | 10    | 0     | -110.9 | 35.3  | $3 \text{ CO}_2 + 6 \text{ H}_2 \rightarrow 4 \text{ H}_2\text{O} + \text{OC}(=\text{O})\text{C}=\text{C}$                                                    |
| 90_145_14 | 10    | 0     | -110.9 | 33.7  | $3 \text{ CO}_2 + 6 \text{ H}_2 \rightarrow 4 \text{ H}_2\text{O} + \text{OC}(=\text{O})\text{C}=\text{C}$                                                    |

| Label     | $n_M$ | $n_B$ | $E_C$  | $E_H$ | Net reaction                                                                                               |
|-----------|-------|-------|--------|-------|------------------------------------------------------------------------------------------------------------|
| 90_145_15 | 10    | 0     | -110.9 | 33.0  | $6 \text{ H}_2 + 3 \text{ CO}_2 \rightarrow 4 \text{ H}_2\text{O} + \text{OC}(=\text{O})\text{C}=\text{C}$ |
| 90_154_4  | 9     | 0     | -97.1  | 33.5  | $2 \text{ CO}_2 + 5 \text{ H}_2 \rightarrow 3 \text{ H}_2\text{O} + \text{CC}=\text{O}$                    |
| 90_154_5  | 9     | 0     | -97.1  | 31.8  | $2 \text{ CO}_2 + 5 \text{ H}_2 \rightarrow 3 \text{ H}_2\text{O} + \text{CC}=\text{O}$                    |
| 90_154_6  | 9     | 0     | -97.1  | 31.1  | $5 \text{ H}_2 + 2 \text{ CO}_2 \rightarrow 3 \text{ H}_2\text{O} + \text{CC}=\text{O}$                    |
| 90_160_1  | 11    | 1     | -143.2 | 46.1  | $3 \text{ CO}_2 + 7 \text{ H}_2 \rightarrow \text{CCC}(=\text{O})\text{O} + 4 \text{ H}_2\text{O}$         |
| 90_160_2  | 11    | 1     | -143.2 | 41.1  | $3 \text{ CO}_2 + 7 \text{ H}_2 \rightarrow \text{CCC}(=\text{O})\text{O} + 4 \text{ H}_2\text{O}$         |
| 90_160_3  | 11    | 1     | -143.2 | 41.1  | $3 \text{ CO}_2 + 7 \text{ H}_2 \rightarrow \text{CCC}(=\text{O})\text{O} + 4 \text{ H}_2\text{O}$         |
| 90_160_4  | 11    | 1     | -143.2 | 46.1  | $3 \text{ CO}_2 + 7 \text{ H}_2 \rightarrow \text{CCC}(=\text{O})\text{O} + 4 \text{ H}_2\text{O}$         |
| 90_160_5  | 11    | 1     | -143.2 | 41.1  | $3 \text{ CO}_2 + 7 \text{ H}_2 \rightarrow \text{CCC}(=\text{O})\text{O} + 4 \text{ H}_2\text{O}$         |
| 90_160_6  | 11    | 1     | -143.2 | 41.1  | $3 \text{ CO}_2 + 7 \text{ H}_2 \rightarrow \text{CCC}(=\text{O})\text{O} + 4 \text{ H}_2\text{O}$         |
| 90_160_7  | 11    | 1     | -143.2 | 46.1  | $7 \text{ H}_2 + 3 \text{ CO}_2 \rightarrow \text{CCC}(=\text{O})\text{O} + 4 \text{ H}_2\text{O}$         |
| 90_160_8  | 11    | 1     | -143.2 | 41.1  | $7 \text{ H}_2 + 3 \text{ CO}_2 \rightarrow \text{CCC}(=\text{O})\text{O} + 4 \text{ H}_2\text{O}$         |
| 90_160_9  | 11    | 1     | -143.2 | 41.1  | $3 \text{ CO}_2 + 7 \text{ H}_2 \rightarrow \text{CCC}(=\text{O})\text{O} + 4 \text{ H}_2\text{O}$         |
| 90_160_10 | 11    | 1     | -143.2 | 46.1  | $3 \text{ CO}_2 + 7 \text{ H}_2 \rightarrow \text{CCC}(=\text{O})\text{O} + 4 \text{ H}_2\text{O}$         |
| 90_160_11 | 11    | 1     | -143.2 | 41.1  | $3 \text{ CO}_2 + 7 \text{ H}_2 \rightarrow \text{CCC}(=\text{O})\text{O} + 4 \text{ H}_2\text{O}$         |
| 90_160_12 | 11    | 1     | -143.2 | 41.1  | $3 \text{ CO}_2 + 7 \text{ H}_2 \rightarrow \text{CCC}(=\text{O})\text{O} + 4 \text{ H}_2\text{O}$         |
| 90_160_13 | 11    | 1     | -143.2 | 46.1  | $3 \text{ CO}_2 + 7 \text{ H}_2 \rightarrow \text{CCC}(=\text{O})\text{O} + 4 \text{ H}_2\text{O}$         |
| 90_160_14 | 11    | 1     | -143.2 | 41.1  | $3 \text{ CO}_2 + 7 \text{ H}_2 \rightarrow \text{CCC}(=\text{O})\text{O} + 4 \text{ H}_2\text{O}$         |

| Label     | $n_M$ | $n_B$ | $E_C$  | $E_H$ | Net reaction                                                                                                                             |
|-----------|-------|-------|--------|-------|------------------------------------------------------------------------------------------------------------------------------------------|
| 90_160_15 | 11    | 1     | -143.2 | 41.1  | $3 \text{ CO}_2 + 7 \text{ H}_2 \rightarrow \text{CCC}(=\text{O})\text{O} + 4 \text{ H}_2\text{O}$                                       |
| 90_160_16 | 11    | 1     | -143.2 | 46.1  | $7 \text{ H}_2 + 3 \text{ CO}_2 \rightarrow \text{CCC}(=\text{O})\text{O} + 4 \text{ H}_2\text{O}$                                       |
| 90_160_17 | 11    | 1     | -143.2 | 41.1  | $7 \text{ H}_2 + 3 \text{ CO}_2 \rightarrow \text{CCC}(=\text{O})\text{O} + 4 \text{ H}_2\text{O}$                                       |
| 90_160_18 | 11    | 1     | -143.2 | 41.1  | $3 \text{ CO}_2 + 7 \text{ H}_2 \rightarrow \text{CCC}(=\text{O})\text{O} + 4 \text{ H}_2\text{O}$                                       |
| 90_166.1  | 4     | 1     | -13.8  | 37.0  | $2 \text{ H}_2 + 2 \text{ CO}_2 \rightarrow \text{O}=\text{CC}(=\text{O})\text{O} + \text{O}$                                            |
| 90_166.3  | 4     | 1     | -13.8  | 45.7  | $2 \text{ CO}_2 + 2 \text{ H}_2 \rightarrow \text{O}=\text{CC}(=\text{O})\text{O} + \text{O}$                                            |
| 90_173.1  | 8     | 0     | -72.6  | 46.6  | $3 \text{ CO}_2 + 4 \text{ H}_2 \rightarrow 2 \text{ H}_2\text{O} + \text{OC}(=\text{O})\text{CC}(=\text{O})\text{O}$                    |
| 90_173.2  | 8     | 0     | -72.6  | 46.6  | $4 \text{ H}_2 + 3 \text{ CO}_2 \rightarrow 2 \text{ H}_2\text{O} + \text{OC}(=\text{O})\text{CC}(=\text{O})\text{O}$                    |
| 90_173.3  | 8     | 0     | -72.6  | 46.6  | $3 \text{ CO}_2 + 4 \text{ H}_2 \rightarrow 2 \text{ H}_2\text{O} + \text{OC}(=\text{O})\text{CC}(=\text{O})\text{O}$                    |
| 90_173.4  | 8     | 0     | -72.6  | 46.6  | $3 \text{ CO}_2 + 4 \text{ H}_2 \rightarrow 2 \text{ H}_2\text{O} + \text{OC}(=\text{O})\text{CC}(=\text{O})\text{O}$                    |
| 90_173.5  | 8     | 0     | -72.6  | 46.6  | $4 \text{ H}_2 + 3 \text{ CO}_2 \rightarrow \text{OC}(=\text{O})\text{CC}(=\text{O})\text{O} + 2 \text{ H}_2\text{O}$                    |
| 90_173.6  | 8     | 0     | -72.6  | 48.5  | $3 \text{ CO}_2 + 4 \text{ H}_2 \rightarrow \text{OC}(=\text{O})\text{CC}(=\text{O})\text{O} + 2 \text{ H}_2\text{O}$                    |
| 90_175.1  | 9     | 0     | -77.5  | 50.8  | $4 \text{ CO}_2 + 5 \text{ H}_2 \rightarrow 3 \text{ H}_2\text{O} + \text{OC}(=\text{O})\text{CC}(=\text{O})\text{C}(=\text{O})\text{O}$ |
| 90_175.2  | 9     | 0     | -82.5  | 50.8  | $2 \text{ CO}_2 + 4 \text{ H}_2 \rightarrow 2 \text{ H}_2\text{O} + \text{CC}(=\text{O})\text{O}$                                        |
| 90_175.4  | 9     | 0     | -77.5  | 50.8  | $5 \text{ H}_2 + 4 \text{ CO}_2 \rightarrow 3 \text{ H}_2\text{O} + \text{OC}(=\text{O})\text{CC}(=\text{O})\text{C}(=\text{O})\text{O}$ |
| 90_175.5  | 9     | 0     | -82.5  | 50.8  | $4 \text{ H}_2 + 2 \text{ CO}_2 \rightarrow 2 \text{ H}_2\text{O} + \text{CC}(=\text{O})\text{O}$                                        |
| 90_175.7  | 9     | 0     | -77.5  | 50.8  | $4 \text{ CO}_2 + 5 \text{ H}_2 \rightarrow 3 \text{ H}_2\text{O} + \text{OC}(=\text{O})\text{CC}(=\text{O})\text{C}(=\text{O})\text{O}$ |
| 90_175.8  | 9     | 0     | -82.5  | 50.8  | $2 \text{ CO}_2 + 4 \text{ H}_2 \rightarrow 2 \text{ H}_2\text{O} + \text{CC}(=\text{O})\text{O}$                                        |

| Label     | $n_M$ | $n_B$ | $E_C$  | $E_H$ | Net reaction                                                                                                                                                                                                    |
|-----------|-------|-------|--------|-------|-----------------------------------------------------------------------------------------------------------------------------------------------------------------------------------------------------------------|
| 90_175_10 | 9     | 0     | -77.5  | 50.8  | $4 \text{ CO}_2 + 5 \text{ H}_2 \rightarrow 3 \text{ H}_2\text{O} + \text{OC}(=\text{O})\text{CC}(=\text{O})\text{C}(=\text{O})\text{O}$                                                                        |
| 90_175_13 | 9     | 0     | -77.5  | 50.8  | $5 \text{ H}_2 + 4 \text{ CO}_2 \rightarrow 3 \text{ H}_2\text{O} + \text{OC}(=\text{O})\text{CC}(=\text{O})\text{C}(=\text{O})\text{O}$                                                                        |
| 90_175_14 | 9     | 0     | -82.5  | 50.8  | $4 \text{ H}_2 + 2 \text{ CO}_2 \rightarrow \text{CC}(=\text{O})\text{O} + 2 \text{ H}_2\text{O}$                                                                                                               |
| 90_175_16 | 9     | 0     | -77.5  | 52.6  | $4 \text{ CO}_2 + 5 \text{ H}_2 \rightarrow 3 \text{ H}_2\text{O} + \text{OC}(=\text{O})\text{CC}(=\text{O})\text{C}(=\text{O})\text{O}$                                                                        |
| 90_177_1  | 4     | 1     | -13.8  | 43.0  | $2 \text{ CO}_2 + 2 \text{ H}_2 \rightarrow \text{O}=\text{CC}(=\text{O})\text{O} + \text{O}$                                                                                                                   |
| 90_177_3  | 4     | 1     | -13.8  | 41.8  | $2 \text{ CO}_2 + 2 \text{ H}_2 \rightarrow \text{O}=\text{CC}(=\text{O})\text{O} + \text{O}$                                                                                                                   |
| 90_182_2  | 5     | 0     | -46.8  | 37.1  | $2 \text{ CO}_2 + 4 \text{ H}_2 \rightarrow 2 \text{ H}_2\text{O} + 2 \text{ C}=\text{O}$                                                                                                                       |
| 90_182_3  | 4     | 0     | -40.9  | 36.4  | $3 \text{ H}_2 + \text{CO}_2 + \text{OCC}(=\text{O})\text{C}(=\text{O})\text{O} \rightarrow$<br>$\rightarrow \text{OCC}(=\text{O})\text{O} + \text{H}_2\text{O} + 2 \text{ C}=\text{O}$                         |
| 90_185_1  | 3     | 0     | -12.6  | 31.3  | $\text{CO}_2 + \text{H}_2 \rightarrow \text{OC}=\text{O}$                                                                                                                                                       |
| 90_187_1  | 10    | 0     | -120.5 | 41.3  | $3 \text{ CO}_2 + 7 \text{ H}_2 \rightarrow 4 \text{ H}_2\text{O} + \text{CC}=\text{O} + \text{C}=\text{O}$                                                                                                     |
| 90_187_2  | 9     | 0     | -120.5 | 41.3  | $3 \text{ CO}_2 + 7 \text{ H}_2 \rightarrow 4 \text{ H}_2\text{O} + \text{CC}=\text{O} + \text{C}=\text{O}$                                                                                                     |
| 90_187_3  | 8     | 0     | -114.5 | 41.3  | $6 \text{ H}_2 + 2 \text{ CO}_2 + \text{OCC}(=\text{O})\text{C}(=\text{O})\text{O} \rightarrow$<br>$\rightarrow \text{OCC}(=\text{O})\text{O} + 3 \text{ H}_2\text{O} + \text{CC}=\text{O} + \text{C}=\text{O}$ |
| 90_190_1  | 9     | 0     | -77.5  | 46.9  | $4 \text{ CO}_2 + 5 \text{ H}_2 \rightarrow 3 \text{ H}_2\text{O} + \text{OC}(=\text{O})\text{CC}(=\text{O})\text{C}(=\text{O})\text{O}$                                                                        |
| 90_190_2  | 9     | 0     | -77.5  | 46.9  | $5 \text{ H}_2 + 4 \text{ CO}_2 \rightarrow 3 \text{ H}_2\text{O} + \text{OC}(=\text{O})\text{CC}(=\text{O})\text{C}(=\text{O})\text{O}$                                                                        |
| 90_190_3  | 9     | 0     | -77.5  | 46.9  | $4 \text{ CO}_2 + 5 \text{ H}_2 \rightarrow 3 \text{ H}_2\text{O} + \text{OC}(=\text{O})\text{CC}(=\text{O})\text{C}(=\text{O})\text{O}$                                                                        |
| 90_190_4  | 9     | 0     | -77.5  | 46.9  | $4 \text{ CO}_2 + 5 \text{ H}_2 \rightarrow 3 \text{ H}_2\text{O} + \text{OC}(=\text{O})\text{CC}(=\text{O})\text{C}(=\text{O})\text{O}$                                                                        |

| Label     | $n_M$ | $n_B$ | $E_C$  | $E_H$ | Net reaction                                                                                                                                                                                                                         |
|-----------|-------|-------|--------|-------|--------------------------------------------------------------------------------------------------------------------------------------------------------------------------------------------------------------------------------------|
| 90_190.5  | 9     | 0     | -77.5  | 46.9  | $5 \text{ H}_2 + 4 \text{ CO}_2 \rightarrow 3 \text{ H}_2\text{O} + \text{OC}(=\text{O})\text{CC}(=\text{O})\text{C}(=\text{O})\text{O}$                                                                                             |
| 90_190.6  | 9     | 0     | -77.5  | 48.7  | $4 \text{ CO}_2 + 5 \text{ H}_2 \rightarrow 3 \text{ H}_2\text{O} + \text{OC}(=\text{O})\text{CC}(=\text{O})\text{C}(=\text{O})\text{O}$                                                                                             |
| 90_215.1  | 15    | 0     | -143.9 | 42.9  | $4 \text{ CO}_2 + 9 \text{ H}_2 \rightarrow 5 \text{ H}_2\text{O} + 2 \text{ C}=\text{O} + \text{CC}=\text{O}$                                                                                                                       |
| 90_215.3  | 14    | 0     | -143.9 | 41.3  | $4 \text{ CO}_2 + 9 \text{ H}_2 \rightarrow 5 \text{ H}_2\text{O} + 2 \text{ C}=\text{O} + \text{CC}=\text{O}$                                                                                                                       |
| 90_215.5  | 13    | 0     | -137.9 | 40.6  | $3 \text{ CO}_2 + 8 \text{ H}_2 + \text{OCC}(=\text{O})\text{C}(=\text{O})\text{O} \rightarrow$<br>$\rightarrow \text{OCC}(=\text{O})\text{O} + 4 \text{ H}_2\text{O} + 2 \text{ C}=\text{O} + \text{CC}=\text{O}$                   |
| 90_215.7  | 15    | 0     | -133.0 | 42.9  | $4 \text{ CO}_2 + 8 \text{ H}_2 \rightarrow 4 \text{ H}_2\text{O} + \text{OC}=\text{O} + \text{CC}=\text{O} + \text{C}=\text{O}$                                                                                                     |
| 90_215.9  | 14    | 0     | -133.0 | 41.3  | $4 \text{ CO}_2 + 8 \text{ H}_2 \rightarrow 4 \text{ H}_2\text{O} + \text{OC}=\text{O} + \text{CC}=\text{O} + \text{C}=\text{O}$                                                                                                     |
| 90_215.11 | 13    | 0     | -127.1 | 40.6  | $3 \text{ CO}_2 + 7 \text{ H}_2 + \text{OCC}(=\text{O})\text{C}(=\text{O})\text{O} \rightarrow$<br>$\rightarrow 3 \text{ H}_2\text{O} + \text{OCC}(=\text{O})\text{O} + \text{OC}=\text{O} + \text{CC}=\text{O} + \text{C}=\text{O}$ |
| 90_218.1  | 10    | 0     | -95.0  | 45.4  | $3 \text{ CO}_2 + 5 \text{ H}_2 \rightarrow 2 \text{ H}_2\text{O} + \text{OC}=\text{O} + \text{CC}(=\text{O})\text{O}$                                                                                                               |
| 90_218.2  | 10    | 0     | -95.0  | 45.4  | $5 \text{ H}_2 + 3 \text{ CO}_2 \rightarrow 2 \text{ H}_2\text{O} + \text{OC}=\text{O} + \text{CC}(=\text{O})\text{O}$                                                                                                               |
| 90_218.3  | 10    | 0     | -95.0  | 45.1  | $3 \text{ CO}_2 + 5 \text{ H}_2 \rightarrow 2 \text{ H}_2\text{O} + \text{OC}=\text{O} + \text{CC}(=\text{O})\text{O}$                                                                                                               |
| 90_218.4  | 10    | 0     | -95.0  | 43.9  | $3 \text{ CO}_2 + 5 \text{ H}_2 \rightarrow 2 \text{ H}_2\text{O} + \text{OC}=\text{O} + \text{CC}(=\text{O})\text{O}$                                                                                                               |
| 90_218.5  | 10    | 0     | -95.0  | 39.5  | $5 \text{ H}_2 + 3 \text{ CO}_2 \rightarrow 2 \text{ H}_2\text{O} + \text{OC}=\text{O} + \text{CC}(=\text{O})\text{O}$                                                                                                               |
| 90_218.6  | 10    | 0     | -95.0  | 45.7  | $3 \text{ CO}_2 + 5 \text{ H}_2 \rightarrow 2 \text{ H}_2\text{O} + \text{OC}=\text{O} + \text{CC}(=\text{O})\text{O}$                                                                                                               |
| 90_228.4  | 12    | 0     | -120.5 | 38.7  | $3 \text{ CO}_2 + 7 \text{ H}_2 \rightarrow 4 \text{ H}_2\text{O} + \text{CC}=\text{O} + \text{C}=\text{O}$                                                                                                                          |
| 90_228.5  | 11    | 0     | -120.5 | 37.1  | $3 \text{ CO}_2 + 7 \text{ H}_2 \rightarrow 4 \text{ H}_2\text{O} + \text{CC}=\text{O} + \text{C}=\text{O}$                                                                                                                          |



| Label     | $n_M$ | $n_B$ | $E_C$  | $E_H$ | Net reaction                                                                                                                                            |
|-----------|-------|-------|--------|-------|---------------------------------------------------------------------------------------------------------------------------------------------------------|
| 90_228_6  | 10    | 0     | -114.5 | 36.4  | $6 \text{ H}_2 + 2 \text{ CO}_2 + \text{OCC(=O)C(=O)O} \rightarrow$<br>$\rightarrow \text{OCC(=O)O} + 3 \text{ H}_2\text{O} + \text{CC=O} + \text{C=O}$ |
| 90_228_7  | 12    | 0     | -120.5 | 41.3  | $3 \text{ CO}_2 + 7 \text{ H}_2 \rightarrow 4 \text{ H}_2\text{O} + \text{CC=O} + \text{C=O}$                                                           |
| 90_228_8  | 11    | 0     | -120.5 | 41.3  | $3 \text{ CO}_2 + 7 \text{ H}_2 \rightarrow 4 \text{ H}_2\text{O} + \text{CC=O} + \text{C=O}$                                                           |
| 90_228_9  | 10    | 0     | -114.5 | 41.3  | $6 \text{ H}_2 + 2 \text{ CO}_2 + \text{OCC(=O)C(=O)O} \rightarrow$<br>$\rightarrow \text{OCC(=O)O} + 3 \text{ H}_2\text{O} + \text{CC=O} + \text{C=O}$ |
| 90_228_10 | 12    | 0     | -120.5 | 38.7  | $3 \text{ CO}_2 + 7 \text{ H}_2 \rightarrow 4 \text{ H}_2\text{O} + \text{CC=O} + \text{C=O}$                                                           |
| 90_228_11 | 11    | 0     | -120.5 | 37.1  | $3 \text{ CO}_2 + 7 \text{ H}_2 \rightarrow 4 \text{ H}_2\text{O} + \text{CC=O} + \text{C=O}$                                                           |
| 90_228_12 | 10    | 0     | -114.5 | 36.4  | $6 \text{ H}_2 + 2 \text{ CO}_2 + \text{OCC(=O)C(=O)O} \rightarrow$<br>$\rightarrow \text{OCC(=O)O} + 3 \text{ H}_2\text{O} + \text{CC=O} + \text{C=O}$ |
| 90_228_13 | 12    | 0     | -120.5 | 41.3  | $3 \text{ CO}_2 + 7 \text{ H}_2 \rightarrow 4 \text{ H}_2\text{O} + \text{CC=O} + \text{C=O}$                                                           |
| 90_228_14 | 11    | 0     | -120.5 | 41.3  | $3 \text{ CO}_2 + 7 \text{ H}_2 \rightarrow 4 \text{ H}_2\text{O} + \text{CC=O} + \text{C=O}$                                                           |
| 90_228_15 | 10    | 0     | -114.5 | 41.3  | $6 \text{ H}_2 + 2 \text{ CO}_2 + \text{OCC(=O)C(=O)O} \rightarrow$<br>$\rightarrow \text{OCC(=O)O} + 3 \text{ H}_2\text{O} + \text{CC=O} + \text{C=O}$ |
| 90_228_16 | 12    | 0     | -120.5 | 38.7  | $3 \text{ CO}_2 + 7 \text{ H}_2 \rightarrow 4 \text{ H}_2\text{O} + \text{CC=O} + \text{C=O}$                                                           |
| 90_228_17 | 11    | 0     | -120.5 | 37.1  | $3 \text{ CO}_2 + 7 \text{ H}_2 \rightarrow 4 \text{ H}_2\text{O} + \text{CC=O} + \text{C=O}$                                                           |
| 90_228_18 | 10    | 0     | -114.5 | 36.4  | $6 \text{ H}_2 + 2 \text{ CO}_2 + \text{OCC(=O)C(=O)O} \rightarrow$<br>$\rightarrow \text{OCC(=O)O} + 3 \text{ H}_2\text{O} + \text{CC=O} + \text{C=O}$ |

| Label     | $n_M$ | $n_B$ | $E_C$  | $E_H$ | Net reaction                                                                         |
|-----------|-------|-------|--------|-------|--------------------------------------------------------------------------------------|
| 90_233_13 | 11    | 0     | -143.2 | 48.8  | $3 \text{ CO}_2 + 7 \text{ H}_2 \rightarrow 4 \text{ H}_2\text{O} + \text{CCC(=O)O}$ |
| 90_233_14 | 11    | 0     | -143.2 | 48.8  | $3 \text{ CO}_2 + 7 \text{ H}_2 \rightarrow 4 \text{ H}_2\text{O} + \text{CCC(=O)O}$ |
| 90_233_15 | 11    | 0     | -143.2 | 48.8  | $3 \text{ CO}_2 + 7 \text{ H}_2 \rightarrow 4 \text{ H}_2\text{O} + \text{CCC(=O)O}$ |
| 90_233_16 | 11    | 0     | -143.2 | 48.8  | $3 \text{ CO}_2 + 7 \text{ H}_2 \rightarrow 4 \text{ H}_2\text{O} + \text{CCC(=O)O}$ |
| 90_233_17 | 11    | 0     | -143.2 | 48.8  | $3 \text{ CO}_2 + 7 \text{ H}_2 \rightarrow 4 \text{ H}_2\text{O} + \text{CCC(=O)O}$ |
| 90_233_18 | 11    | 0     | -143.2 | 48.8  | $3 \text{ CO}_2 + 7 \text{ H}_2 \rightarrow 4 \text{ H}_2\text{O} + \text{CCC(=O)O}$ |
| 90_233_19 | 11    | 0     | -143.2 | 40.7  | $3 \text{ CO}_2 + 7 \text{ H}_2 \rightarrow 4 \text{ H}_2\text{O} + \text{CCC(=O)O}$ |
| 90_233_20 | 11    | 0     | -143.2 | 40.7  | $3 \text{ CO}_2 + 7 \text{ H}_2 \rightarrow 4 \text{ H}_2\text{O} + \text{CCC(=O)O}$ |
| 90_233_21 | 11    | 0     | -143.2 | 40.7  | $3 \text{ CO}_2 + 7 \text{ H}_2 \rightarrow 4 \text{ H}_2\text{O} + \text{CCC(=O)O}$ |
| 90_233_22 | 11    | 0     | -143.2 | 40.7  | $3 \text{ CO}_2 + 7 \text{ H}_2 \rightarrow 4 \text{ H}_2\text{O} + \text{CCC(=O)O}$ |
| 90_233_23 | 11    | 0     | -143.2 | 40.7  | $7 \text{ H}_2 + 3 \text{ CO}_2 \rightarrow 4 \text{ H}_2\text{O} + \text{CCC(=O)O}$ |
| 90_233_24 | 11    | 0     | -143.2 | 40.7  | $3 \text{ CO}_2 + 7 \text{ H}_2 \rightarrow 4 \text{ H}_2\text{O} + \text{CCC(=O)O}$ |
| 90_233_25 | 11    | 0     | -143.2 | 40.7  | $3 \text{ CO}_2 + 7 \text{ H}_2 \rightarrow 4 \text{ H}_2\text{O} + \text{CCC(=O)O}$ |
| 90_233_26 | 11    | 0     | -143.2 | 40.7  | $3 \text{ CO}_2 + 7 \text{ H}_2 \rightarrow 4 \text{ H}_2\text{O} + \text{CCC(=O)O}$ |
| 90_233_27 | 11    | 0     | -143.2 | 40.7  | $3 \text{ CO}_2 + 7 \text{ H}_2 \rightarrow 4 \text{ H}_2\text{O} + \text{CCC(=O)O}$ |
| 90_233_28 | 11    | 0     | -143.2 | 40.7  | $3 \text{ CO}_2 + 7 \text{ H}_2 \rightarrow 4 \text{ H}_2\text{O} + \text{CCC(=O)O}$ |
| 90_233_29 | 11    | 0     | -143.2 | 40.7  | $7 \text{ H}_2 + 3 \text{ CO}_2 \rightarrow 4 \text{ H}_2\text{O} + \text{CCC(=O)O}$ |
| 90_233_30 | 11    | 0     | -143.2 | 40.7  | $3 \text{ CO}_2 + 7 \text{ H}_2 \rightarrow 4 \text{ H}_2\text{O} + \text{CCC(=O)O}$ |

| Label     | $n_M$ | $n_B$ | $E_C$  | $E_H$ | Net reaction                                                                                               |
|-----------|-------|-------|--------|-------|------------------------------------------------------------------------------------------------------------|
| 90_233_31 | 11    | 0     | -143.2 | 41.7  | $3 \text{ CO}_2 + 7 \text{ H}_2 \rightarrow 4 \text{ H}_2\text{O} + \text{CCC}(=\text{O})\text{O}$         |
| 90_233_32 | 11    | 0     | -143.2 | 41.7  | $3 \text{ CO}_2 + 7 \text{ H}_2 \rightarrow 4 \text{ H}_2\text{O} + \text{CCC}(=\text{O})\text{O}$         |
| 90_233_33 | 11    | 0     | -143.2 | 41.7  | $3 \text{ CO}_2 + 7 \text{ H}_2 \rightarrow 4 \text{ H}_2\text{O} + \text{CCC}(=\text{O})\text{O}$         |
| 90_233_34 | 11    | 0     | -143.2 | 41.7  | $3 \text{ CO}_2 + 7 \text{ H}_2 \rightarrow 4 \text{ H}_2\text{O} + \text{CCC}(=\text{O})\text{O}$         |
| 90_233_35 | 11    | 0     | -143.2 | 41.7  | $7 \text{ H}_2 + 3 \text{ CO}_2 \rightarrow 4 \text{ H}_2\text{O} + \text{CCC}(=\text{O})\text{O}$         |
| 90_233_36 | 11    | 0     | -143.2 | 41.7  | $3 \text{ CO}_2 + 7 \text{ H}_2 \rightarrow 4 \text{ H}_2\text{O} + \text{CCC}(=\text{O})\text{O}$         |
| 90_233_37 | 11    | 0     | -143.2 | 38.2  | $3 \text{ CO}_2 + 7 \text{ H}_2 \rightarrow 4 \text{ H}_2\text{O} + \text{CCC}(=\text{O})\text{O}$         |
| 90_233_38 | 11    | 0     | -143.2 | 38.2  | $3 \text{ CO}_2 + 7 \text{ H}_2 \rightarrow 4 \text{ H}_2\text{O} + \text{CCC}(=\text{O})\text{O}$         |
| 90_233_39 | 11    | 0     | -143.2 | 38.2  | $3 \text{ CO}_2 + 7 \text{ H}_2 \rightarrow 4 \text{ H}_2\text{O} + \text{CCC}(=\text{O})\text{O}$         |
| 90_233_40 | 11    | 0     | -143.2 | 38.2  | $3 \text{ CO}_2 + 7 \text{ H}_2 \rightarrow 4 \text{ H}_2\text{O} + \text{CCC}(=\text{O})\text{O}$         |
| 90_233_41 | 11    | 0     | -143.2 | 38.2  | $7 \text{ H}_2 + 3 \text{ CO}_2 \rightarrow 4 \text{ H}_2\text{O} + \text{CCC}(=\text{O})\text{O}$         |
| 90_233_42 | 11    | 0     | -143.2 | 38.2  | $3 \text{ CO}_2 + 7 \text{ H}_2 \rightarrow 4 \text{ H}_2\text{O} + \text{CCC}(=\text{O})\text{O}$         |
| 90_237_1  | 10    | 0     | -110.9 | 40.3  | $3 \text{ CO}_2 + 6 \text{ H}_2 \rightarrow 4 \text{ H}_2\text{O} + \text{OC}(=\text{O})\text{C}=\text{C}$ |
| 90_237_2  | 10    | 0     | -110.9 | 40.3  | $3 \text{ CO}_2 + 6 \text{ H}_2 \rightarrow 4 \text{ H}_2\text{O} + \text{OC}(=\text{O})\text{C}=\text{C}$ |
| 90_237_3  | 10    | 0     | -110.9 | 40.3  | $6 \text{ H}_2 + 3 \text{ CO}_2 \rightarrow 4 \text{ H}_2\text{O} + \text{OC}(=\text{O})\text{C}=\text{C}$ |
| 90_237_4  | 10    | 0     | -110.9 | 37.7  | $3 \text{ CO}_2 + 6 \text{ H}_2 \rightarrow 4 \text{ H}_2\text{O} + \text{OC}(=\text{O})\text{C}=\text{C}$ |
| 90_237_5  | 10    | 0     | -110.9 | 36.1  | $3 \text{ CO}_2 + 6 \text{ H}_2 \rightarrow 4 \text{ H}_2\text{O} + \text{OC}(=\text{O})\text{C}=\text{C}$ |
| 90_237_6  | 10    | 0     | -110.9 | 35.4  | $6 \text{ H}_2 + 3 \text{ CO}_2 \rightarrow 4 \text{ H}_2\text{O} + \text{OC}(=\text{O})\text{C}=\text{C}$ |

| Label     | $n_M$ | $n_B$ | $E_C$  | $E_H$ | Net reaction                                                                                   |
|-----------|-------|-------|--------|-------|------------------------------------------------------------------------------------------------|
| 90_237.7  | 10    | 1     | -110.9 | 40.3  | $3 \text{ CO}_2 + 6 \text{ H}_2 \rightarrow \text{OC(=O)C=C} + 4 \text{ H}_2\text{O}$          |
| 90_237.8  | 10    | 1     | -110.9 | 40.3  | $3 \text{ CO}_2 + 6 \text{ H}_2 \rightarrow \text{OC(=O)C=C} + 4 \text{ H}_2\text{O}$          |
| 90_237.9  | 10    | 1     | -110.9 | 40.3  | $6 \text{ H}_2 + 3 \text{ CO}_2 \rightarrow \text{OC(=O)C=C} + 4 \text{ H}_2\text{O}$          |
| 90_237.10 | 10    | 1     | -110.9 | 37.7  | $3 \text{ CO}_2 + 6 \text{ H}_2 \rightarrow \text{OC(=O)C=C} + 4 \text{ H}_2\text{O}$          |
| 90_237.11 | 10    | 1     | -110.9 | 36.1  | $3 \text{ CO}_2 + 6 \text{ H}_2 \rightarrow \text{OC(=O)C=C} + 4 \text{ H}_2\text{O}$          |
| 90_237.12 | 10    | 1     | -110.9 | 35.4  | $6 \text{ H}_2 + 3 \text{ CO}_2 \rightarrow \text{OC(=O)C=C} + 4 \text{ H}_2\text{O}$          |
| 90_241.7  | 9     | 0     | -77.5  | 46.6  | $4 \text{ CO}_2 + 5 \text{ H}_2 \rightarrow 3 \text{ H}_2\text{O} + \text{OC(=O)CC(=O)C(=O)O}$ |
| 90_241.8  | 9     | 0     | -77.5  | 46.6  | $5 \text{ H}_2 + 4 \text{ CO}_2 \rightarrow 3 \text{ H}_2\text{O} + \text{OC(=O)CC(=O)C(=O)O}$ |
| 90_241.9  | 9     | 0     | -77.5  | 46.6  | $4 \text{ CO}_2 + 5 \text{ H}_2 \rightarrow 3 \text{ H}_2\text{O} + \text{OC(=O)CC(=O)C(=O)O}$ |
| 90_241.10 | 9     | 0     | -77.5  | 46.6  | $4 \text{ CO}_2 + 5 \text{ H}_2 \rightarrow 3 \text{ H}_2\text{O} + \text{OC(=O)CC(=O)C(=O)O}$ |
| 90_241.11 | 9     | 0     | -77.5  | 46.6  | $5 \text{ H}_2 + 4 \text{ CO}_2 \rightarrow 3 \text{ H}_2\text{O} + \text{OC(=O)CC(=O)C(=O)O}$ |
| 90_241.12 | 9     | 0     | -77.5  | 48.5  | $4 \text{ CO}_2 + 5 \text{ H}_2 \rightarrow 3 \text{ H}_2\text{O} + \text{OC(=O)CC(=O)C(=O)O}$ |
| 90_243.1  | 4     | 1     | -13.8  | 43.6  | $2 \text{ CO}_2 + 2 \text{ H}_2 \rightarrow \text{O=CC(=O)O} + \text{O}$                       |
| 90_243.3  | 4     | 1     | -13.8  | 42.9  | $2 \text{ H}_2 + 2 \text{ CO}_2 \rightarrow \text{O=CC(=O)O} + \text{O}$                       |
| 90_255.1  | 12    | 1     | -135.3 | 47.4  | $4 \text{ CO}_2 + 7 \text{ H}_2 \rightarrow \text{OC(=O)CCC(=O)O} + 4 \text{ H}_2\text{O}$     |
| 90_255.2  | 12    | 1     | -135.3 | 47.4  | $4 \text{ CO}_2 + 7 \text{ H}_2 \rightarrow \text{OC(=O)CCC(=O)O} + 4 \text{ H}_2\text{O}$     |
| 90_255.3  | 12    | 1     | -135.3 | 47.4  | $7 \text{ H}_2 + 4 \text{ CO}_2 \rightarrow \text{OC(=O)CCC(=O)O} + 4 \text{ H}_2\text{O}$     |
| 90_255.4  | 12    | 1     | -135.3 | 47.4  | $7 \text{ H}_2 + 4 \text{ CO}_2 \rightarrow \text{OC(=O)CCC(=O)O} + 4 \text{ H}_2\text{O}$     |

| Label     | $n_M$ | $n_B$ | $E_C$  | $E_H$ | Net reaction                                                                               |
|-----------|-------|-------|--------|-------|--------------------------------------------------------------------------------------------|
| 90_255.5  | 12    | 1     | -135.3 | 47.1  | $4 \text{ CO}_2 + 7 \text{ H}_2 \rightarrow \text{OC(=O)CCC(=O)O} + 4 \text{ H}_2\text{O}$ |
| 90_255.6  | 12    | 1     | -135.3 | 47.1  | $4 \text{ CO}_2 + 7 \text{ H}_2 \rightarrow \text{OC(=O)CCC(=O)O} + 4 \text{ H}_2\text{O}$ |
| 90_255.7  | 12    | 1     | -135.3 | 45.8  | $4 \text{ CO}_2 + 7 \text{ H}_2 \rightarrow \text{OC(=O)CCC(=O)O} + 4 \text{ H}_2\text{O}$ |
| 90_255.8  | 12    | 1     | -135.3 | 45.8  | $4 \text{ CO}_2 + 7 \text{ H}_2 \rightarrow \text{OC(=O)CCC(=O)O} + 4 \text{ H}_2\text{O}$ |
| 90_255.9  | 12    | 1     | -135.3 | 43.7  | $7 \text{ H}_2 + 4 \text{ CO}_2 \rightarrow \text{OC(=O)CCC(=O)O} + 4 \text{ H}_2\text{O}$ |
| 90_255.10 | 12    | 1     | -135.3 | 41.5  | $7 \text{ H}_2 + 4 \text{ CO}_2 \rightarrow \text{OC(=O)CCC(=O)O} + 4 \text{ H}_2\text{O}$ |
| 90_255.11 | 12    | 1     | -135.3 | 45.8  | $4 \text{ CO}_2 + 7 \text{ H}_2 \rightarrow \text{OC(=O)CCC(=O)O} + 4 \text{ H}_2\text{O}$ |
| 90_255.12 | 12    | 1     | -135.3 | 45.8  | $4 \text{ CO}_2 + 7 \text{ H}_2 \rightarrow \text{OC(=O)CCC(=O)O} + 4 \text{ H}_2\text{O}$ |
| 90_258.1  | 11    | 0     | -143.2 | 45.7  | $3 \text{ CO}_2 + 7 \text{ H}_2 \rightarrow 4 \text{ H}_2\text{O} + \text{CCC(=O)O}$       |
| 90_258.2  | 11    | 0     | -143.2 | 45.7  | $3 \text{ CO}_2 + 7 \text{ H}_2 \rightarrow 4 \text{ H}_2\text{O} + \text{CCC(=O)O}$       |
| 90_258.3  | 11    | 0     | -143.2 | 45.7  | $7 \text{ H}_2 + 3 \text{ CO}_2 \rightarrow 4 \text{ H}_2\text{O} + \text{CCC(=O)O}$       |
| 90_258.4  | 11    | 0     | -143.2 | 45.5  | $3 \text{ CO}_2 + 7 \text{ H}_2 \rightarrow 4 \text{ H}_2\text{O} + \text{CCC(=O)O}$       |
| 90_258.5  | 11    | 0     | -143.2 | 45.5  | $3 \text{ CO}_2 + 7 \text{ H}_2 \rightarrow 4 \text{ H}_2\text{O} + \text{CCC(=O)O}$       |
| 90_258.6  | 11    | 0     | -143.2 | 45.5  | $7 \text{ H}_2 + 3 \text{ CO}_2 \rightarrow 4 \text{ H}_2\text{O} + \text{CCC(=O)O}$       |
| 90_258.7  | 11    | 0     | -143.2 | 45.7  | $3 \text{ CO}_2 + 7 \text{ H}_2 \rightarrow 4 \text{ H}_2\text{O} + \text{CCC(=O)O}$       |
| 90_258.8  | 11    | 0     | -143.2 | 45.7  | $3 \text{ CO}_2 + 7 \text{ H}_2 \rightarrow 4 \text{ H}_2\text{O} + \text{CCC(=O)O}$       |
| 90_258.9  | 11    | 0     | -143.2 | 45.7  | $7 \text{ H}_2 + 3 \text{ CO}_2 \rightarrow 4 \text{ H}_2\text{O} + \text{CCC(=O)O}$       |
| 90_258.10 | 11    | 0     | -143.2 | 45.5  | $3 \text{ CO}_2 + 7 \text{ H}_2 \rightarrow 4 \text{ H}_2\text{O} + \text{CCC(=O)O}$       |

| Label     | $n_M$ | $n_B$ | $E_C$  | $E_H$ | Net reaction                                                                                                                                                                        |
|-----------|-------|-------|--------|-------|-------------------------------------------------------------------------------------------------------------------------------------------------------------------------------------|
| 90_258_11 | 11    | 0     | -143.2 | 45.5  | $3 \text{ CO}_2 + 7 \text{ H}_2 \rightarrow 4 \text{ H}_2\text{O} + \text{CCC(=O)O}$                                                                                                |
| 90_258_12 | 11    | 0     | -143.2 | 45.5  | $7 \text{ H}_2 + 3 \text{ CO}_2 \rightarrow 4 \text{ H}_2\text{O} + \text{CCC(=O)O}$                                                                                                |
| 90_269_1  | 16    | 2     | -134.3 | 41.3  | $5 \text{ CO}_2 + 9 \text{ H}_2 \rightarrow \text{CC=O} + \text{O=CC(=O)O} + 5 \text{ H}_2\text{O} + \text{C=O}$                                                                    |
| 90_269_2  | 15    | 1     | -119.7 | 43.9  | $5 \text{ CO}_2 + 8 \text{ H}_2 \rightarrow \text{O=CC(=O)O} + 4 \text{ H}_2\text{O} + \text{C=O} + \text{CC(=O)O}$                                                                 |
| 90_269_3  | 15    | 2     | -134.3 | 41.3  | $5 \text{ CO}_2 + 9 \text{ H}_2 \rightarrow \text{CC=O} + \text{O=CC(=O)O} + 5 \text{ H}_2\text{O} + \text{C=O}$                                                                    |
| 90_269_4  | 14    | 1     | -92.0  | 43.9  | $5 \text{ CO}_2 + 7 \text{ H}_2 + \text{OCC(=O)C(=O)O} \rightarrow$<br>$\rightarrow \text{O=CC(=O)O} + \text{O=CC(=O)C(=O)O} + 4 \text{ H}_2\text{O} + \text{C=O} + \text{CC(=O)O}$ |
| 90_269_5  | 14    | 2     | -128.3 | 41.3  | $4 \text{ CO}_2 + 8 \text{ H}_2 + \text{OCC(=O)C(=O)O} \rightarrow$<br>$\rightarrow \text{CC=O} + \text{O=CC(=O)O} + \text{OCC(=O)O} + 4 \text{ H}_2\text{O} + \text{C=O}$          |
| 90_269_6  | 15    | 1     | -119.7 | 43.9  | $5 \text{ CO}_2 + 8 \text{ H}_2 \rightarrow \text{O=CC(=O)O} + 4 \text{ H}_2\text{O} + \text{C=O} + \text{CC(=O)O}$                                                                 |
| 90_312_19 | 11    | 0     | -143.2 | 40.3  | $3 \text{ CO}_2 + 7 \text{ H}_2 \rightarrow 4 \text{ H}_2\text{O} + \text{CCC(=O)O}$                                                                                                |
| 90_312_20 | 11    | 0     | -143.2 | 40.3  | $3 \text{ CO}_2 + 7 \text{ H}_2 \rightarrow 4 \text{ H}_2\text{O} + \text{CCC(=O)O}$                                                                                                |
| 90_312_21 | 11    | 0     | -143.2 | 40.3  | $7 \text{ H}_2 + 3 \text{ CO}_2 \rightarrow 4 \text{ H}_2\text{O} + \text{CCC(=O)O}$                                                                                                |
| 90_312_22 | 11    | 0     | -143.2 | 37.7  | $3 \text{ CO}_2 + 7 \text{ H}_2 \rightarrow 4 \text{ H}_2\text{O} + \text{CCC(=O)O}$                                                                                                |
| 90_312_23 | 11    | 0     | -143.2 | 36.1  | $3 \text{ CO}_2 + 7 \text{ H}_2 \rightarrow 4 \text{ H}_2\text{O} + \text{CCC(=O)O}$                                                                                                |
| 90_312_24 | 11    | 0     | -143.2 | 35.4  | $7 \text{ H}_2 + 3 \text{ CO}_2 \rightarrow 4 \text{ H}_2\text{O} + \text{CCC(=O)O}$                                                                                                |
| 90_312_25 | 11    | 0     | -143.2 | 40.3  | $3 \text{ CO}_2 + 7 \text{ H}_2 \rightarrow 4 \text{ H}_2\text{O} + \text{CCC(=O)O}$                                                                                                |
| 90_312_26 | 11    | 0     | -143.2 | 40.3  | $3 \text{ CO}_2 + 7 \text{ H}_2 \rightarrow 4 \text{ H}_2\text{O} + \text{CCC(=O)O}$                                                                                                |

| Label     | $n_M$ | $n_B$ | $E_C$  | $E_H$ | Net reaction                                                                                       |
|-----------|-------|-------|--------|-------|----------------------------------------------------------------------------------------------------|
| 90_312_27 | 11    | 0     | -143.2 | 40.3  | $7 \text{ H}_2 + 3 \text{ CO}_2 \rightarrow 4 \text{ H}_2\text{O} + \text{CCC}(=\text{O})\text{O}$ |
| 90_312_28 | 11    | 0     | -143.2 | 37.7  | $3 \text{ CO}_2 + 7 \text{ H}_2 \rightarrow 4 \text{ H}_2\text{O} + \text{CCC}(=\text{O})\text{O}$ |
| 90_312_29 | 11    | 0     | -143.2 | 36.1  | $3 \text{ CO}_2 + 7 \text{ H}_2 \rightarrow 4 \text{ H}_2\text{O} + \text{CCC}(=\text{O})\text{O}$ |
| 90_312_30 | 11    | 0     | -143.2 | 35.4  | $7 \text{ H}_2 + 3 \text{ CO}_2 \rightarrow 4 \text{ H}_2\text{O} + \text{CCC}(=\text{O})\text{O}$ |
| 90_312_31 | 11    | 0     | -143.2 | 48.6  | $3 \text{ CO}_2 + 7 \text{ H}_2 \rightarrow 4 \text{ H}_2\text{O} + \text{CCC}(=\text{O})\text{O}$ |
| 90_312_32 | 11    | 0     | -143.2 | 48.6  | $3 \text{ CO}_2 + 7 \text{ H}_2 \rightarrow 4 \text{ H}_2\text{O} + \text{CCC}(=\text{O})\text{O}$ |
| 90_312_33 | 11    | 0     | -143.2 | 48.6  | $3 \text{ CO}_2 + 7 \text{ H}_2 \rightarrow 4 \text{ H}_2\text{O} + \text{CCC}(=\text{O})\text{O}$ |
| 90_312_34 | 11    | 0     | -143.2 | 40.5  | $3 \text{ CO}_2 + 7 \text{ H}_2 \rightarrow 4 \text{ H}_2\text{O} + \text{CCC}(=\text{O})\text{O}$ |
| 90_312_35 | 11    | 0     | -143.2 | 40.5  | $3 \text{ CO}_2 + 7 \text{ H}_2 \rightarrow 4 \text{ H}_2\text{O} + \text{CCC}(=\text{O})\text{O}$ |
| 90_312_36 | 11    | 0     | -143.2 | 40.5  | $7 \text{ H}_2 + 3 \text{ CO}_2 \rightarrow 4 \text{ H}_2\text{O} + \text{CCC}(=\text{O})\text{O}$ |
| 90_312_37 | 11    | 0     | -143.2 | 37.8  | $3 \text{ CO}_2 + 7 \text{ H}_2 \rightarrow 4 \text{ H}_2\text{O} + \text{CCC}(=\text{O})\text{O}$ |
| 90_312_38 | 11    | 0     | -143.2 | 36.2  | $3 \text{ CO}_2 + 7 \text{ H}_2 \rightarrow 4 \text{ H}_2\text{O} + \text{CCC}(=\text{O})\text{O}$ |
| 90_312_39 | 11    | 0     | -143.2 | 35.5  | $7 \text{ H}_2 + 3 \text{ CO}_2 \rightarrow 4 \text{ H}_2\text{O} + \text{CCC}(=\text{O})\text{O}$ |
| 90_312_40 | 11    | 0     | -143.2 | 38.9  | $3 \text{ CO}_2 + 7 \text{ H}_2 \rightarrow 4 \text{ H}_2\text{O} + \text{CCC}(=\text{O})\text{O}$ |
| 90_312_41 | 11    | 0     | -143.2 | 37.2  | $3 \text{ CO}_2 + 7 \text{ H}_2 \rightarrow 4 \text{ H}_2\text{O} + \text{CCC}(=\text{O})\text{O}$ |
| 90_312_42 | 11    | 0     | -143.2 | 36.5  | $7 \text{ H}_2 + 3 \text{ CO}_2 \rightarrow 4 \text{ H}_2\text{O} + \text{CCC}(=\text{O})\text{O}$ |
| 90_312_43 | 11    | 0     | -143.2 | 35.3  | $3 \text{ CO}_2 + 7 \text{ H}_2 \rightarrow 4 \text{ H}_2\text{O} + \text{CCC}(=\text{O})\text{O}$ |
| 90_312_44 | 11    | 0     | -143.2 | 33.7  | $3 \text{ CO}_2 + 7 \text{ H}_2 \rightarrow 4 \text{ H}_2\text{O} + \text{CCC}(=\text{O})\text{O}$ |

| Label     | $n_M$ | $n_B$ | $E_C$  | $E_H$ | Net reaction                                                                                                                                        |
|-----------|-------|-------|--------|-------|-----------------------------------------------------------------------------------------------------------------------------------------------------|
| 90_312_45 | 11    | 0     | -143.2 | 33.0  | $7 \text{ H}_2 + 3 \text{ CO}_2 \rightarrow 4 \text{ H}_2\text{O} + \text{CCC(=O)O}$                                                                |
| 90_318_1  | 13    | 0     | -194.1 | 32.9  | $4 \text{ CO}_2 + 10 \text{ H}_2 \rightarrow 6 \text{ H}_2\text{O} + 2 \text{ CC=O}$                                                                |
| 90_318_2  | 12    | 0     | -190.3 | 32.9  | $3 \text{ CO}_2 + 9 \text{ H}_2 + \text{CC(C(=O)C(=O)O)O} \rightarrow$<br>$\rightarrow \text{OC(=O)C(O)C} + 5 \text{ H}_2\text{O} + 2 \text{ CC=O}$ |
| 90_318_3  | 14    | 1     | -179.5 | 37.0  | $4 \text{ CO}_2 + 9 \text{ H}_2 \rightarrow \text{CC(=O)O} + 5 \text{ H}_2\text{O} + \text{CC=O}$                                                   |
| 90_318_4  | 14    | 1     | -179.5 | 41.7  | $4 \text{ CO}_2 + 9 \text{ H}_2 \rightarrow \text{CC(=O)O} + 5 \text{ H}_2\text{O} + \text{CC=O}$                                                   |
| 90_318_5  | 14    | 1     | -179.5 | 41.7  | $4 \text{ CO}_2 + 9 \text{ H}_2 \rightarrow \text{CC(=O)O} + 5 \text{ H}_2\text{O} + \text{CC=O}$                                                   |
| 90_318_6  | 13    | 0     | -194.1 | 32.9  | $4 \text{ CO}_2 + 10 \text{ H}_2 \rightarrow 6 \text{ H}_2\text{O} + 2 \text{ CC=O}$                                                                |
| 90_318_7  | 12    | 0     | -190.3 | 32.9  | $3 \text{ CO}_2 + 9 \text{ H}_2 + \text{CC(C(=O)C(=O)O)O} \rightarrow$<br>$\rightarrow \text{OC(=O)C(O)C} + 5 \text{ H}_2\text{O} + 2 \text{ CC=O}$ |
| 90_318_8  | 14    | 1     | -179.5 | 37.0  | $4 \text{ CO}_2 + 9 \text{ H}_2 \rightarrow \text{CC(=O)O} + 5 \text{ H}_2\text{O} + \text{CC=O}$                                                   |
| 90_318_9  | 14    | 1     | -179.5 | 41.7  | $4 \text{ CO}_2 + 9 \text{ H}_2 \rightarrow \text{CC(=O)O} + 5 \text{ H}_2\text{O} + \text{CC=O}$                                                   |
| 90_318_10 | 14    | 1     | -179.5 | 41.7  | $4 \text{ CO}_2 + 9 \text{ H}_2 \rightarrow \text{CC(=O)O} + 5 \text{ H}_2\text{O} + \text{CC=O}$                                                   |
| 90_318_11 | 13    | 0     | -194.1 | 32.9  | $4 \text{ CO}_2 + 10 \text{ H}_2 \rightarrow 6 \text{ H}_2\text{O} + 2 \text{ CC=O}$                                                                |
| 90_318_12 | 12    | 0     | -190.3 | 32.9  | $3 \text{ CO}_2 + 9 \text{ H}_2 + \text{CC(C(=O)C(=O)O)O} \rightarrow$<br>$\rightarrow \text{OC(=O)C(O)C} + 5 \text{ H}_2\text{O} + 2 \text{ CC=O}$ |
| 90_318_13 | 14    | 1     | -179.5 | 37.0  | $4 \text{ CO}_2 + 9 \text{ H}_2 \rightarrow \text{CC(=O)O} + 5 \text{ H}_2\text{O} + \text{CC=O}$                                                   |
| 90_318_14 | 14    | 1     | -179.5 | 41.7  | $4 \text{ CO}_2 + 9 \text{ H}_2 \rightarrow \text{CC(=O)O} + 5 \text{ H}_2\text{O} + \text{CC=O}$                                                   |



| Label     | $n_M$ | $n_B$ | $E_C$  | $E_H$ | Net reaction                                                                                                                                        |
|-----------|-------|-------|--------|-------|-----------------------------------------------------------------------------------------------------------------------------------------------------|
| 90_318_15 | 14    | 1     | -179.5 | 41.7  | $4 \text{ CO}_2 + 9 \text{ H}_2 \rightarrow \text{CC(=O)O} + 5 \text{ H}_2\text{O} + \text{CC=O}$                                                   |
| 90_320_2  | 15    | 0     | -194.1 | 35.6  | $4 \text{ CO}_2 + 10 \text{ H}_2 \rightarrow 6 \text{ H}_2\text{O} + 2 \text{ CC=O}$                                                                |
| 90_320_3  | 14    | 0     | -190.3 | 35.6  | $3 \text{ CO}_2 + 9 \text{ H}_2 + \text{CC(C(=O)C(=O)O)O} \rightarrow$<br>$\rightarrow \text{OC(=O)C(O)C} + 5 \text{ H}_2\text{O} + 2 \text{ CC=O}$ |
| 90_320_4  | 16    | 1     | -179.5 | 37.0  | $4 \text{ CO}_2 + 9 \text{ H}_2 \rightarrow \text{CC(=O)O} + 5 \text{ H}_2\text{O} + \text{CC=O}$                                                   |
| 90_320_5  | 16    | 1     | -179.5 | 41.7  | $4 \text{ CO}_2 + 9 \text{ H}_2 \rightarrow \text{CC(=O)O} + 5 \text{ H}_2\text{O} + \text{CC=O}$                                                   |
| 90_320_6  | 16    | 1     | -179.5 | 41.7  | $4 \text{ CO}_2 + 9 \text{ H}_2 \rightarrow \text{CC(=O)O} + 5 \text{ H}_2\text{O} + \text{CC=O}$                                                   |
| 90_320_8  | 15    | 0     | -194.1 | 35.6  | $4 \text{ CO}_2 + 10 \text{ H}_2 \rightarrow 6 \text{ H}_2\text{O} + 2 \text{ CC=O}$                                                                |
| 90_320_9  | 14    | 0     | -190.3 | 35.6  | $3 \text{ CO}_2 + 9 \text{ H}_2 + \text{CC(C(=O)C(=O)O)O} \rightarrow$<br>$\rightarrow \text{OC(=O)C(O)C} + 5 \text{ H}_2\text{O} + 2 \text{ CC=O}$ |
| 90_320_10 | 16    | 1     | -179.5 | 37.0  | $4 \text{ CO}_2 + 9 \text{ H}_2 \rightarrow \text{CC(=O)O} + 5 \text{ H}_2\text{O} + \text{CC=O}$                                                   |
| 90_320_11 | 16    | 1     | -179.5 | 41.7  | $4 \text{ CO}_2 + 9 \text{ H}_2 \rightarrow \text{CC(=O)O} + 5 \text{ H}_2\text{O} + \text{CC=O}$                                                   |
| 90_320_12 | 16    | 1     | -179.5 | 41.7  | $4 \text{ CO}_2 + 9 \text{ H}_2 \rightarrow \text{CC(=O)O} + 5 \text{ H}_2\text{O} + \text{CC=O}$                                                   |
| 90_320_14 | 15    | 0     | -194.1 | 35.6  | $4 \text{ CO}_2 + 10 \text{ H}_2 \rightarrow 6 \text{ H}_2\text{O} + 2 \text{ CC=O}$                                                                |
| 90_320_15 | 14    | 0     | -190.3 | 35.6  | $3 \text{ CO}_2 + 9 \text{ H}_2 + \text{CC(C(=O)C(=O)O)O} \rightarrow$<br>$\rightarrow \text{OC(=O)C(O)C} + 5 \text{ H}_2\text{O} + 2 \text{ CC=O}$ |
| 90_320_16 | 16    | 1     | -179.5 | 37.0  | $4 \text{ CO}_2 + 9 \text{ H}_2 \rightarrow \text{CC(=O)O} + 5 \text{ H}_2\text{O} + \text{CC=O}$                                                   |
| 90_320_17 | 16    | 1     | -179.5 | 41.7  | $4 \text{ CO}_2 + 9 \text{ H}_2 \rightarrow \text{CC(=O)O} + 5 \text{ H}_2\text{O} + \text{CC=O}$                                                   |

| Label     | $n_M$ | $n_B$ | $E_C$  | $E_H$ | Net reaction                                                                                      |
|-----------|-------|-------|--------|-------|---------------------------------------------------------------------------------------------------|
| 90_320_18 | 16    | 1     | -179.5 | 41.7  | $4 \text{ CO}_2 + 9 \text{ H}_2 \rightarrow \text{CC(=O)O} + 5 \text{ H}_2\text{O} + \text{CC=O}$ |
| 90_320_20 | 16    | 0     | -194.1 | 34.6  | $4 \text{ CO}_2 + 10 \text{ H}_2 \rightarrow 6 \text{ H}_2\text{O} + 2 \text{ CC=O}$              |
| 90_320_21 | 16    | 0     | -194.1 | 34.6  | $4 \text{ CO}_2 + 10 \text{ H}_2 \rightarrow 6 \text{ H}_2\text{O} + 2 \text{ CC=O}$              |
| 90_320_22 | 16    | 1     | -179.5 | 35.9  | $4 \text{ CO}_2 + 9 \text{ H}_2 \rightarrow \text{CC(=O)O} + 5 \text{ H}_2\text{O} + \text{CC=O}$ |
| 90_320_23 | 16    | 1     | -179.5 | 40.6  | $4 \text{ CO}_2 + 9 \text{ H}_2 \rightarrow \text{CC(=O)O} + 5 \text{ H}_2\text{O} + \text{CC=O}$ |
| 90_320_24 | 16    | 1     | -179.5 | 40.6  | $4 \text{ CO}_2 + 9 \text{ H}_2 \rightarrow \text{CC(=O)O} + 5 \text{ H}_2\text{O} + \text{CC=O}$ |
| 90_320_26 | 16    | 0     | -194.1 | 34.6  | $4 \text{ CO}_2 + 10 \text{ H}_2 \rightarrow 6 \text{ H}_2\text{O} + 2 \text{ CC=O}$              |
| 90_320_27 | 16    | 0     | -194.1 | 34.6  | $4 \text{ CO}_2 + 10 \text{ H}_2 \rightarrow 6 \text{ H}_2\text{O} + 2 \text{ CC=O}$              |
| 90_320_28 | 16    | 1     | -179.5 | 35.9  | $4 \text{ CO}_2 + 9 \text{ H}_2 \rightarrow \text{CC(=O)O} + 5 \text{ H}_2\text{O} + \text{CC=O}$ |
| 90_320_29 | 16    | 1     | -179.5 | 40.6  | $4 \text{ CO}_2 + 9 \text{ H}_2 \rightarrow \text{CC(=O)O} + 5 \text{ H}_2\text{O} + \text{CC=O}$ |
| 90_320_30 | 16    | 1     | -179.5 | 40.6  | $4 \text{ CO}_2 + 9 \text{ H}_2 \rightarrow \text{CC(=O)O} + 5 \text{ H}_2\text{O} + \text{CC=O}$ |
| 90_320_32 | 16    | 0     | -194.1 | 34.6  | $4 \text{ CO}_2 + 10 \text{ H}_2 \rightarrow 6 \text{ H}_2\text{O} + 2 \text{ CC=O}$              |
| 90_320_33 | 16    | 0     | -194.1 | 34.6  | $4 \text{ CO}_2 + 10 \text{ H}_2 \rightarrow 6 \text{ H}_2\text{O} + 2 \text{ CC=O}$              |
| 90_320_34 | 16    | 1     | -179.5 | 35.9  | $4 \text{ CO}_2 + 9 \text{ H}_2 \rightarrow \text{CC(=O)O} + 5 \text{ H}_2\text{O} + \text{CC=O}$ |
| 90_320_35 | 16    | 1     | -179.5 | 40.6  | $4 \text{ CO}_2 + 9 \text{ H}_2 \rightarrow \text{CC(=O)O} + 5 \text{ H}_2\text{O} + \text{CC=O}$ |
| 90_320_36 | 16    | 1     | -179.5 | 40.6  | $4 \text{ CO}_2 + 9 \text{ H}_2 \rightarrow \text{CC(=O)O} + 5 \text{ H}_2\text{O} + \text{CC=O}$ |
| 90_320_38 | 15    | 0     | -194.1 | 35.6  | $4 \text{ CO}_2 + 10 \text{ H}_2 \rightarrow 6 \text{ H}_2\text{O} + 2 \text{ CC=O}$              |
| 90_320_39 | 14    | 0     | -190.3 | 35.6  | $3 \text{ CO}_2 + 9 \text{ H}_2 + \text{CC(C(=O)C(=O)O)O} \rightarrow$                            |

| Label     | $n_M$ | $n_B$ | $E_C$  | $E_H$ | Net reaction                                                                                                                                                                                                                 |
|-----------|-------|-------|--------|-------|------------------------------------------------------------------------------------------------------------------------------------------------------------------------------------------------------------------------------|
|           |       |       |        |       | $\rightarrow \text{OC}(=\text{O})\text{C}(\text{O})\text{C} + 5 \text{H}_2\text{O} + 2 \text{CC}=\text{O}$                                                                                                                   |
| 90_320_40 | 16    | 1     | -179.5 | 37.0  | $4 \text{CO}_2 + 9 \text{H}_2 \rightarrow \text{CC}(=\text{O})\text{O} + 5 \text{H}_2\text{O} + \text{CC}=\text{O}$                                                                                                          |
| 90_320_41 | 16    | 1     | -179.5 | 41.7  | $4 \text{CO}_2 + 9 \text{H}_2 \rightarrow \text{CC}(=\text{O})\text{O} + 5 \text{H}_2\text{O} + \text{CC}=\text{O}$                                                                                                          |
| 90_320_42 | 16    | 1     | -179.5 | 41.7  | $4 \text{CO}_2 + 9 \text{H}_2 \rightarrow \text{CC}(=\text{O})\text{O} + 5 \text{H}_2\text{O} + \text{CC}=\text{O}$                                                                                                          |
| 90_320_44 | 15    | 0     | -194.1 | 35.6  | $4 \text{CO}_2 + 10 \text{H}_2 \rightarrow 6 \text{H}_2\text{O} + 2 \text{CC}=\text{O}$                                                                                                                                      |
| 90_320_45 | 14    | 0     | -190.3 | 35.6  | $3 \text{CO}_2 + 9 \text{H}_2 + \text{CC}(\text{C}(=\text{O})\text{C}(=\text{O})\text{O})\text{O} \rightarrow$<br>$\rightarrow \text{OC}(=\text{O})\text{C}(\text{O})\text{C} + 5 \text{H}_2\text{O} + 2 \text{CC}=\text{O}$ |
| 90_320_46 | 16    | 1     | -179.5 | 37.0  | $4 \text{CO}_2 + 9 \text{H}_2 \rightarrow \text{CC}(=\text{O})\text{O} + 5 \text{H}_2\text{O} + \text{CC}=\text{O}$                                                                                                          |
| 90_320_47 | 16    | 1     | -179.5 | 41.7  | $4 \text{CO}_2 + 9 \text{H}_2 \rightarrow \text{CC}(=\text{O})\text{O} + 5 \text{H}_2\text{O} + \text{CC}=\text{O}$                                                                                                          |
| 90_320_48 | 16    | 1     | -179.5 | 41.7  | $4 \text{CO}_2 + 9 \text{H}_2 \rightarrow \text{CC}(=\text{O})\text{O} + 5 \text{H}_2\text{O} + \text{CC}=\text{O}$                                                                                                          |
| 90_320_50 | 15    | 0     | -194.1 | 35.6  | $4 \text{CO}_2 + 10 \text{H}_2 \rightarrow 6 \text{H}_2\text{O} + 2 \text{CC}=\text{O}$                                                                                                                                      |
| 90_320_51 | 14    | 0     | -190.3 | 35.6  | $3 \text{CO}_2 + 9 \text{H}_2 + \text{CC}(\text{C}(=\text{O})\text{C}(=\text{O})\text{O})\text{O} \rightarrow$<br>$\rightarrow \text{OC}(=\text{O})\text{C}(\text{O})\text{C} + 5 \text{H}_2\text{O} + 2 \text{CC}=\text{O}$ |
| 90_320_52 | 16    | 1     | -179.5 | 37.0  | $4 \text{CO}_2 + 9 \text{H}_2 \rightarrow \text{CC}(=\text{O})\text{O} + 5 \text{H}_2\text{O} + \text{CC}=\text{O}$                                                                                                          |
| 90_320_53 | 16    | 1     | -179.5 | 41.7  | $4 \text{CO}_2 + 9 \text{H}_2 \rightarrow \text{CC}(=\text{O})\text{O} + 5 \text{H}_2\text{O} + \text{CC}=\text{O}$                                                                                                          |
| 90_320_54 | 16    | 1     | -179.5 | 41.7  | $4 \text{CO}_2 + 9 \text{H}_2 \rightarrow \text{CC}(=\text{O})\text{O} + 5 \text{H}_2\text{O} + \text{CC}=\text{O}$                                                                                                          |
| 90_320_56 | 16    | 0     | -194.1 | 34.6  | $4 \text{CO}_2 + 10 \text{H}_2 \rightarrow 6 \text{H}_2\text{O} + 2 \text{CC}=\text{O}$                                                                                                                                      |
| 90_320_57 | 16    | 0     | -194.1 | 34.6  | $4 \text{CO}_2 + 10 \text{H}_2 \rightarrow 6 \text{H}_2\text{O} + 2 \text{CC}=\text{O}$                                                                                                                                      |

| Label     | $n_M$ | $n_B$ | $E_C$  | $E_H$ | Net reaction                                                                                      |
|-----------|-------|-------|--------|-------|---------------------------------------------------------------------------------------------------|
| 90_320_58 | 16    | 1     | -179.5 | 35.9  | $4 \text{ CO}_2 + 9 \text{ H}_2 \rightarrow \text{CC(=O)O} + 5 \text{ H}_2\text{O} + \text{CC=O}$ |
| 90_320_59 | 16    | 1     | -179.5 | 40.6  | $4 \text{ CO}_2 + 9 \text{ H}_2 \rightarrow \text{CC(=O)O} + 5 \text{ H}_2\text{O} + \text{CC=O}$ |
| 90_320_60 | 16    | 1     | -179.5 | 40.6  | $4 \text{ CO}_2 + 9 \text{ H}_2 \rightarrow \text{CC(=O)O} + 5 \text{ H}_2\text{O} + \text{CC=O}$ |
| 90_320_62 | 16    | 0     | -194.1 | 34.6  | $4 \text{ CO}_2 + 10 \text{ H}_2 \rightarrow 6 \text{ H}_2\text{O} + 2 \text{ CC=O}$              |
| 90_320_63 | 16    | 0     | -194.1 | 34.6  | $4 \text{ CO}_2 + 10 \text{ H}_2 \rightarrow 6 \text{ H}_2\text{O} + 2 \text{ CC=O}$              |
| 90_320_64 | 16    | 1     | -179.5 | 35.9  | $4 \text{ CO}_2 + 9 \text{ H}_2 \rightarrow \text{CC(=O)O} + 5 \text{ H}_2\text{O} + \text{CC=O}$ |
| 90_320_65 | 16    | 1     | -179.5 | 40.6  | $4 \text{ CO}_2 + 9 \text{ H}_2 \rightarrow \text{CC(=O)O} + 5 \text{ H}_2\text{O} + \text{CC=O}$ |
| 90_320_66 | 16    | 1     | -179.5 | 40.6  | $4 \text{ CO}_2 + 9 \text{ H}_2 \rightarrow \text{CC(=O)O} + 5 \text{ H}_2\text{O} + \text{CC=O}$ |
| 90_320_68 | 16    | 0     | -194.1 | 34.6  | $4 \text{ CO}_2 + 10 \text{ H}_2 \rightarrow 6 \text{ H}_2\text{O} + 2 \text{ CC=O}$              |
| 90_320_69 | 16    | 0     | -194.1 | 34.6  | $4 \text{ CO}_2 + 10 \text{ H}_2 \rightarrow 6 \text{ H}_2\text{O} + 2 \text{ CC=O}$              |
| 90_320_70 | 16    | 1     | -179.5 | 35.9  | $4 \text{ CO}_2 + 9 \text{ H}_2 \rightarrow \text{CC(=O)O} + 5 \text{ H}_2\text{O} + \text{CC=O}$ |
| 90_320_71 | 16    | 1     | -179.5 | 40.6  | $4 \text{ CO}_2 + 9 \text{ H}_2 \rightarrow \text{CC(=O)O} + 5 \text{ H}_2\text{O} + \text{CC=O}$ |
| 90_320_72 | 16    | 1     | -179.5 | 40.6  | $4 \text{ CO}_2 + 9 \text{ H}_2 \rightarrow \text{CC(=O)O} + 5 \text{ H}_2\text{O} + \text{CC=O}$ |
| 90_320_74 | 16    | 0     | -194.1 | 35.6  | $4 \text{ CO}_2 + 10 \text{ H}_2 \rightarrow 6 \text{ H}_2\text{O} + 2 \text{ CC=O}$              |
| 90_320_75 | 15    | 0     | -194.1 | 35.6  | $4 \text{ CO}_2 + 10 \text{ H}_2 \rightarrow 6 \text{ H}_2\text{O} + 2 \text{ CC=O}$              |
| 90_320_76 | 16    | 1     | -179.5 | 37.0  | $4 \text{ CO}_2 + 9 \text{ H}_2 \rightarrow \text{CC(=O)O} + 5 \text{ H}_2\text{O} + \text{CC=O}$ |
| 90_320_77 | 16    | 1     | -179.5 | 41.7  | $4 \text{ CO}_2 + 9 \text{ H}_2 \rightarrow \text{CC(=O)O} + 5 \text{ H}_2\text{O} + \text{CC=O}$ |
| 90_320_78 | 16    | 1     | -179.5 | 41.7  | $4 \text{ CO}_2 + 9 \text{ H}_2 \rightarrow \text{CC(=O)O} + 5 \text{ H}_2\text{O} + \text{CC=O}$ |

| Label      | $n_M$ | $n_B$ | $E_C$  | $E_H$ | Net reaction                                                                                                           |
|------------|-------|-------|--------|-------|------------------------------------------------------------------------------------------------------------------------|
| 90_320_80  | 16    | 0     | -194.1 | 35.6  | $4 \text{ CO}_2 + 10 \text{ H}_2 \rightarrow 6 \text{ H}_2\text{O} + 2 \text{ CC}=\text{O}$                            |
| 90_320_81  | 15    | 0     | -194.1 | 35.6  | $4 \text{ CO}_2 + 10 \text{ H}_2 \rightarrow 6 \text{ H}_2\text{O} + 2 \text{ CC}=\text{O}$                            |
| 90_320_82  | 16    | 1     | -179.5 | 37.0  | $4 \text{ CO}_2 + 9 \text{ H}_2 \rightarrow \text{CC}(=\text{O})\text{O} + 5 \text{ H}_2\text{O} + \text{CC}=\text{O}$ |
| 90_320_83  | 16    | 1     | -179.5 | 41.7  | $4 \text{ CO}_2 + 9 \text{ H}_2 \rightarrow \text{CC}(=\text{O})\text{O} + 5 \text{ H}_2\text{O} + \text{CC}=\text{O}$ |
| 90_320_84  | 16    | 1     | -179.5 | 41.7  | $4 \text{ CO}_2 + 9 \text{ H}_2 \rightarrow \text{CC}(=\text{O})\text{O} + 5 \text{ H}_2\text{O} + \text{CC}=\text{O}$ |
| 90_320_86  | 16    | 0     | -194.1 | 35.6  | $4 \text{ CO}_2 + 10 \text{ H}_2 \rightarrow 6 \text{ H}_2\text{O} + 2 \text{ CC}=\text{O}$                            |
| 90_320_87  | 15    | 0     | -194.1 | 35.6  | $4 \text{ CO}_2 + 10 \text{ H}_2 \rightarrow 6 \text{ H}_2\text{O} + 2 \text{ CC}=\text{O}$                            |
| 90_320_88  | 16    | 1     | -179.5 | 37.0  | $4 \text{ CO}_2 + 9 \text{ H}_2 \rightarrow \text{CC}(=\text{O})\text{O} + 5 \text{ H}_2\text{O} + \text{CC}=\text{O}$ |
| 90_320_89  | 16    | 1     | -179.5 | 41.7  | $4 \text{ CO}_2 + 9 \text{ H}_2 \rightarrow \text{CC}(=\text{O})\text{O} + 5 \text{ H}_2\text{O} + \text{CC}=\text{O}$ |
| 90_320_90  | 16    | 1     | -179.5 | 41.7  | $4 \text{ CO}_2 + 9 \text{ H}_2 \rightarrow \text{CC}(=\text{O})\text{O} + 5 \text{ H}_2\text{O} + \text{CC}=\text{O}$ |
| 90_320_92  | 16    | 0     | -194.1 | 34.6  | $4 \text{ CO}_2 + 10 \text{ H}_2 \rightarrow 6 \text{ H}_2\text{O} + 2 \text{ CC}=\text{O}$                            |
| 90_320_93  | 16    | 0     | -194.1 | 34.6  | $4 \text{ CO}_2 + 10 \text{ H}_2 \rightarrow 6 \text{ H}_2\text{O} + 2 \text{ CC}=\text{O}$                            |
| 90_320_94  | 16    | 1     | -179.5 | 35.9  | $4 \text{ CO}_2 + 9 \text{ H}_2 \rightarrow \text{CC}(=\text{O})\text{O} + 5 \text{ H}_2\text{O} + \text{CC}=\text{O}$ |
| 90_320_95  | 16    | 1     | -179.5 | 40.6  | $4 \text{ CO}_2 + 9 \text{ H}_2 \rightarrow \text{CC}(=\text{O})\text{O} + 5 \text{ H}_2\text{O} + \text{CC}=\text{O}$ |
| 90_320_96  | 16    | 1     | -179.5 | 40.6  | $4 \text{ CO}_2 + 9 \text{ H}_2 \rightarrow \text{CC}(=\text{O})\text{O} + 5 \text{ H}_2\text{O} + \text{CC}=\text{O}$ |
| 90_320_98  | 16    | 0     | -194.1 | 34.6  | $4 \text{ CO}_2 + 10 \text{ H}_2 \rightarrow 6 \text{ H}_2\text{O} + 2 \text{ CC}=\text{O}$                            |
| 90_320_99  | 16    | 0     | -194.1 | 34.6  | $4 \text{ CO}_2 + 10 \text{ H}_2 \rightarrow 6 \text{ H}_2\text{O} + 2 \text{ CC}=\text{O}$                            |
| 90_320_100 | 16    | 1     | -179.5 | 35.9  | $4 \text{ CO}_2 + 9 \text{ H}_2 \rightarrow \text{CC}(=\text{O})\text{O} + 5 \text{ H}_2\text{O} + \text{CC}=\text{O}$ |

| Label      | $n_M$ | $n_B$ | $E_C$  | $E_H$ | Net reaction                                                                                                                                        |
|------------|-------|-------|--------|-------|-----------------------------------------------------------------------------------------------------------------------------------------------------|
| 90.320.101 | 16    | 1     | -179.5 | 40.6  | $4 \text{ CO}_2 + 9 \text{ H}_2 \rightarrow \text{CC(=O)O} + 5 \text{ H}_2\text{O} + \text{CC=O}$                                                   |
| 90.320.102 | 16    | 1     | -179.5 | 40.6  | $4 \text{ CO}_2 + 9 \text{ H}_2 \rightarrow \text{CC(=O)O} + 5 \text{ H}_2\text{O} + \text{CC=O}$                                                   |
| 90.320.104 | 16    | 0     | -194.1 | 34.6  | $4 \text{ CO}_2 + 10 \text{ H}_2 \rightarrow 6 \text{ H}_2\text{O} + 2 \text{ CC=O}$                                                                |
| 90.320.105 | 16    | 0     | -194.1 | 34.6  | $4 \text{ CO}_2 + 10 \text{ H}_2 \rightarrow 6 \text{ H}_2\text{O} + 2 \text{ CC=O}$                                                                |
| 90.320.106 | 16    | 1     | -179.5 | 35.9  | $4 \text{ CO}_2 + 9 \text{ H}_2 \rightarrow \text{CC(=O)O} + 5 \text{ H}_2\text{O} + \text{CC=O}$                                                   |
| 90.320.107 | 16    | 1     | -179.5 | 40.6  | $4 \text{ CO}_2 + 9 \text{ H}_2 \rightarrow \text{CC(=O)O} + 5 \text{ H}_2\text{O} + \text{CC=O}$                                                   |
| 90.320.108 | 16    | 1     | -179.5 | 40.6  | $4 \text{ CO}_2 + 9 \text{ H}_2 \rightarrow \text{CC(=O)O} + 5 \text{ H}_2\text{O} + \text{CC=O}$                                                   |
| 90.320.110 | 15    | 0     | -194.1 | 35.6  | $4 \text{ CO}_2 + 10 \text{ H}_2 \rightarrow 6 \text{ H}_2\text{O} + 2 \text{ CC=O}$                                                                |
| 90.320.111 | 14    | 0     | -190.3 | 35.6  | $3 \text{ CO}_2 + 9 \text{ H}_2 + \text{CC(C(=O)C(=O)O)O} \rightarrow$<br>$\rightarrow \text{OC(=O)C(O)C} + 5 \text{ H}_2\text{O} + 2 \text{ CC=O}$ |
| 90.320.112 | 16    | 1     | -179.5 | 37.0  | $4 \text{ CO}_2 + 9 \text{ H}_2 \rightarrow \text{CC(=O)O} + 5 \text{ H}_2\text{O} + \text{CC=O}$                                                   |
| 90.320.113 | 16    | 1     | -179.5 | 41.7  | $4 \text{ CO}_2 + 9 \text{ H}_2 \rightarrow \text{CC(=O)O} + 5 \text{ H}_2\text{O} + \text{CC=O}$                                                   |
| 90.320.114 | 16    | 1     | -179.5 | 41.7  | $4 \text{ CO}_2 + 9 \text{ H}_2 \rightarrow \text{CC(=O)O} + 5 \text{ H}_2\text{O} + \text{CC=O}$                                                   |
| 90.320.116 | 15    | 0     | -194.1 | 35.6  | $4 \text{ CO}_2 + 10 \text{ H}_2 \rightarrow 6 \text{ H}_2\text{O} + 2 \text{ CC=O}$                                                                |
| 90.320.117 | 14    | 0     | -190.3 | 35.6  | $3 \text{ CO}_2 + 9 \text{ H}_2 + \text{CC(C(=O)C(=O)O)O} \rightarrow$<br>$\rightarrow \text{OC(=O)C(O)C} + 5 \text{ H}_2\text{O} + 2 \text{ CC=O}$ |
| 90.320.118 | 16    | 1     | -179.5 | 37.0  | $4 \text{ CO}_2 + 9 \text{ H}_2 \rightarrow \text{CC(=O)O} + 5 \text{ H}_2\text{O} + \text{CC=O}$                                                   |
| 90.320.119 | 16    | 1     | -179.5 | 41.7  | $4 \text{ CO}_2 + 9 \text{ H}_2 \rightarrow \text{CC(=O)O} + 5 \text{ H}_2\text{O} + \text{CC=O}$                                                   |

| Label      | $n_M$ | $n_B$ | $E_C$  | $E_H$ | Net reaction                                                                                                                                                                                                                     |
|------------|-------|-------|--------|-------|----------------------------------------------------------------------------------------------------------------------------------------------------------------------------------------------------------------------------------|
| 90_320_120 | 16    | 1     | -179.5 | 41.7  | $4 \text{ CO}_2 + 9 \text{ H}_2 \rightarrow \text{CC}(=\text{O})\text{O} + 5 \text{ H}_2\text{O} + \text{CC}=\text{O}$                                                                                                           |
| 90_320_122 | 15    | 0     | -194.1 | 35.6  | $4 \text{ CO}_2 + 10 \text{ H}_2 \rightarrow 6 \text{ H}_2\text{O} + 2 \text{ CC}=\text{O}$                                                                                                                                      |
| 90_320_123 | 14    | 0     | -190.3 | 35.6  | $3 \text{ CO}_2 + 9 \text{ H}_2 + \text{CC}(\text{C}(=\text{O})\text{C}(=\text{O})\text{O})\text{O} \rightarrow$<br>$\rightarrow \text{OC}(=\text{O})\text{C}(\text{O})\text{C} + 5 \text{ H}_2\text{O} + 2 \text{ CC}=\text{O}$ |
| 90_320_124 | 16    | 1     | -179.5 | 37.0  | $4 \text{ CO}_2 + 9 \text{ H}_2 \rightarrow \text{CC}(=\text{O})\text{O} + 5 \text{ H}_2\text{O} + \text{CC}=\text{O}$                                                                                                           |
| 90_320_125 | 16    | 1     | -179.5 | 41.7  | $4 \text{ CO}_2 + 9 \text{ H}_2 \rightarrow \text{CC}(=\text{O})\text{O} + 5 \text{ H}_2\text{O} + \text{CC}=\text{O}$                                                                                                           |
| 90_320_126 | 16    | 1     | -179.5 | 41.7  | $4 \text{ CO}_2 + 9 \text{ H}_2 \rightarrow \text{CC}(=\text{O})\text{O} + 5 \text{ H}_2\text{O} + \text{CC}=\text{O}$                                                                                                           |
| 90_320_128 | 16    | 0     | -194.1 | 35.4  | $4 \text{ CO}_2 + 10 \text{ H}_2 \rightarrow 6 \text{ H}_2\text{O} + 2 \text{ CC}=\text{O}$                                                                                                                                      |
| 90_320_129 | 16    | 0     | -194.1 | 35.4  | $4 \text{ CO}_2 + 10 \text{ H}_2 \rightarrow 6 \text{ H}_2\text{O} + 2 \text{ CC}=\text{O}$                                                                                                                                      |
| 90_320_130 | 16    | 1     | -179.5 | 36.8  | $4 \text{ CO}_2 + 9 \text{ H}_2 \rightarrow \text{CC}(=\text{O})\text{O} + 5 \text{ H}_2\text{O} + \text{CC}=\text{O}$                                                                                                           |
| 90_320_131 | 16    | 1     | -179.5 | 41.5  | $4 \text{ CO}_2 + 9 \text{ H}_2 \rightarrow \text{CC}(=\text{O})\text{O} + 5 \text{ H}_2\text{O} + \text{CC}=\text{O}$                                                                                                           |
| 90_320_132 | 16    | 1     | -179.5 | 41.5  | $4 \text{ CO}_2 + 9 \text{ H}_2 \rightarrow \text{CC}(=\text{O})\text{O} + 5 \text{ H}_2\text{O} + \text{CC}=\text{O}$                                                                                                           |
| 90_320_134 | 16    | 0     | -194.1 | 35.4  | $4 \text{ CO}_2 + 10 \text{ H}_2 \rightarrow 6 \text{ H}_2\text{O} + 2 \text{ CC}=\text{O}$                                                                                                                                      |
| 90_320_135 | 16    | 0     | -194.1 | 35.4  | $4 \text{ CO}_2 + 10 \text{ H}_2 \rightarrow 6 \text{ H}_2\text{O} + 2 \text{ CC}=\text{O}$                                                                                                                                      |
| 90_320_136 | 16    | 1     | -179.5 | 36.8  | $4 \text{ CO}_2 + 9 \text{ H}_2 \rightarrow \text{CC}(=\text{O})\text{O} + 5 \text{ H}_2\text{O} + \text{CC}=\text{O}$                                                                                                           |
| 90_320_137 | 16    | 1     | -179.5 | 41.5  | $4 \text{ CO}_2 + 9 \text{ H}_2 \rightarrow \text{CC}(=\text{O})\text{O} + 5 \text{ H}_2\text{O} + \text{CC}=\text{O}$                                                                                                           |
| 90_320_138 | 16    | 1     | -179.5 | 41.5  | $4 \text{ CO}_2 + 9 \text{ H}_2 \rightarrow \text{CC}(=\text{O})\text{O} + 5 \text{ H}_2\text{O} + \text{CC}=\text{O}$                                                                                                           |
| 90_320_140 | 16    | 0     | -194.1 | 35.4  | $4 \text{ CO}_2 + 10 \text{ H}_2 \rightarrow 6 \text{ H}_2\text{O} + 2 \text{ CC}=\text{O}$                                                                                                                                      |

| Label      | $n_M$ | $n_B$ | $E_C$  | $E_H$ | Net reaction                                                                                                           |
|------------|-------|-------|--------|-------|------------------------------------------------------------------------------------------------------------------------|
| 90_320_141 | 16    | 0     | -194.1 | 35.4  | $4 \text{ CO}_2 + 10 \text{ H}_2 \rightarrow 6 \text{ H}_2\text{O} + 2 \text{ CC}=\text{O}$                            |
| 90_320_142 | 16    | 1     | -179.5 | 36.8  | $4 \text{ CO}_2 + 9 \text{ H}_2 \rightarrow \text{CC}(=\text{O})\text{O} + 5 \text{ H}_2\text{O} + \text{CC}=\text{O}$ |
| 90_320_143 | 16    | 1     | -179.5 | 41.5  | $4 \text{ CO}_2 + 9 \text{ H}_2 \rightarrow \text{CC}(=\text{O})\text{O} + 5 \text{ H}_2\text{O} + \text{CC}=\text{O}$ |
| 90_320_144 | 16    | 1     | -179.5 | 41.5  | $4 \text{ CO}_2 + 9 \text{ H}_2 \rightarrow \text{CC}(=\text{O})\text{O} + 5 \text{ H}_2\text{O} + \text{CC}=\text{O}$ |
| 90_320_146 | 16    | 0     | -194.1 | 35.6  | $4 \text{ CO}_2 + 10 \text{ H}_2 \rightarrow 6 \text{ H}_2\text{O} + 2 \text{ CC}=\text{O}$                            |
| 90_320_147 | 15    | 0     | -194.1 | 35.6  | $4 \text{ CO}_2 + 10 \text{ H}_2 \rightarrow 6 \text{ H}_2\text{O} + 2 \text{ CC}=\text{O}$                            |
| 90_320_148 | 16    | 1     | -179.5 | 37.0  | $4 \text{ CO}_2 + 9 \text{ H}_2 \rightarrow \text{CC}(=\text{O})\text{O} + 5 \text{ H}_2\text{O} + \text{CC}=\text{O}$ |
| 90_320_149 | 16    | 1     | -179.5 | 41.7  | $4 \text{ CO}_2 + 9 \text{ H}_2 \rightarrow \text{CC}(=\text{O})\text{O} + 5 \text{ H}_2\text{O} + \text{CC}=\text{O}$ |
| 90_320_150 | 16    | 1     | -179.5 | 41.7  | $4 \text{ CO}_2 + 9 \text{ H}_2 \rightarrow \text{CC}(=\text{O})\text{O} + 5 \text{ H}_2\text{O} + \text{CC}=\text{O}$ |
| 90_320_152 | 16    | 0     | -194.1 | 35.6  | $4 \text{ CO}_2 + 10 \text{ H}_2 \rightarrow 6 \text{ H}_2\text{O} + 2 \text{ CC}=\text{O}$                            |
| 90_320_153 | 15    | 0     | -194.1 | 35.6  | $4 \text{ CO}_2 + 10 \text{ H}_2 \rightarrow 6 \text{ H}_2\text{O} + 2 \text{ CC}=\text{O}$                            |
| 90_320_154 | 16    | 1     | -179.5 | 37.0  | $4 \text{ CO}_2 + 9 \text{ H}_2 \rightarrow \text{CC}(=\text{O})\text{O} + 5 \text{ H}_2\text{O} + \text{CC}=\text{O}$ |
| 90_320_155 | 16    | 1     | -179.5 | 41.7  | $4 \text{ CO}_2 + 9 \text{ H}_2 \rightarrow \text{CC}(=\text{O})\text{O} + 5 \text{ H}_2\text{O} + \text{CC}=\text{O}$ |
| 90_320_156 | 16    | 1     | -179.5 | 41.7  | $4 \text{ CO}_2 + 9 \text{ H}_2 \rightarrow \text{CC}(=\text{O})\text{O} + 5 \text{ H}_2\text{O} + \text{CC}=\text{O}$ |
| 90_320_158 | 16    | 0     | -194.1 | 35.6  | $4 \text{ CO}_2 + 10 \text{ H}_2 \rightarrow 6 \text{ H}_2\text{O} + 2 \text{ CC}=\text{O}$                            |
| 90_320_159 | 15    | 0     | -194.1 | 35.6  | $4 \text{ CO}_2 + 10 \text{ H}_2 \rightarrow 6 \text{ H}_2\text{O} + 2 \text{ CC}=\text{O}$                            |
| 90_320_160 | 16    | 1     | -179.5 | 37.0  | $4 \text{ CO}_2 + 9 \text{ H}_2 \rightarrow \text{CC}(=\text{O})\text{O} + 5 \text{ H}_2\text{O} + \text{CC}=\text{O}$ |
| 90_320_161 | 16    | 1     | -179.5 | 41.7  | $4 \text{ CO}_2 + 9 \text{ H}_2 \rightarrow \text{CC}(=\text{O})\text{O} + 5 \text{ H}_2\text{O} + \text{CC}=\text{O}$ |



| Label      | $n_M$ | $n_B$ | $E_C$  | $E_H$ | Net reaction                                                                                      |
|------------|-------|-------|--------|-------|---------------------------------------------------------------------------------------------------|
| 90_320_162 | 16    | 1     | -179.5 | 41.7  | $4 \text{ CO}_2 + 9 \text{ H}_2 \rightarrow \text{CC(=O)O} + 5 \text{ H}_2\text{O} + \text{CC=O}$ |
| 90_320_164 | 16    | 0     | -194.1 | 35.4  | $4 \text{ CO}_2 + 10 \text{ H}_2 \rightarrow 6 \text{ H}_2\text{O} + 2 \text{ CC=O}$              |
| 90_320_165 | 16    | 0     | -194.1 | 35.4  | $4 \text{ CO}_2 + 10 \text{ H}_2 \rightarrow 6 \text{ H}_2\text{O} + 2 \text{ CC=O}$              |
| 90_320_166 | 16    | 1     | -179.5 | 36.8  | $4 \text{ CO}_2 + 9 \text{ H}_2 \rightarrow \text{CC(=O)O} + 5 \text{ H}_2\text{O} + \text{CC=O}$ |
| 90_320_167 | 16    | 1     | -179.5 | 41.5  | $4 \text{ CO}_2 + 9 \text{ H}_2 \rightarrow \text{CC(=O)O} + 5 \text{ H}_2\text{O} + \text{CC=O}$ |
| 90_320_168 | 16    | 1     | -179.5 | 41.5  | $4 \text{ CO}_2 + 9 \text{ H}_2 \rightarrow \text{CC(=O)O} + 5 \text{ H}_2\text{O} + \text{CC=O}$ |
| 90_320_170 | 16    | 0     | -194.1 | 35.4  | $4 \text{ CO}_2 + 10 \text{ H}_2 \rightarrow 6 \text{ H}_2\text{O} + 2 \text{ CC=O}$              |
| 90_320_171 | 16    | 0     | -194.1 | 35.4  | $4 \text{ CO}_2 + 10 \text{ H}_2 \rightarrow 6 \text{ H}_2\text{O} + 2 \text{ CC=O}$              |
| 90_320_172 | 16    | 1     | -179.5 | 36.8  | $4 \text{ CO}_2 + 9 \text{ H}_2 \rightarrow \text{CC(=O)O} + 5 \text{ H}_2\text{O} + \text{CC=O}$ |
| 90_320_173 | 16    | 1     | -179.5 | 41.5  | $4 \text{ CO}_2 + 9 \text{ H}_2 \rightarrow \text{CC(=O)O} + 5 \text{ H}_2\text{O} + \text{CC=O}$ |
| 90_320_174 | 16    | 1     | -179.5 | 41.5  | $4 \text{ CO}_2 + 9 \text{ H}_2 \rightarrow \text{CC(=O)O} + 5 \text{ H}_2\text{O} + \text{CC=O}$ |
| 90_320_176 | 16    | 0     | -194.1 | 35.4  | $4 \text{ CO}_2 + 10 \text{ H}_2 \rightarrow 6 \text{ H}_2\text{O} + 2 \text{ CC=O}$              |
| 90_320_177 | 16    | 0     | -194.1 | 35.4  | $4 \text{ CO}_2 + 10 \text{ H}_2 \rightarrow 6 \text{ H}_2\text{O} + 2 \text{ CC=O}$              |
| 90_320_178 | 16    | 1     | -179.5 | 36.8  | $4 \text{ CO}_2 + 9 \text{ H}_2 \rightarrow \text{CC(=O)O} + 5 \text{ H}_2\text{O} + \text{CC=O}$ |
| 90_320_179 | 16    | 1     | -179.5 | 41.5  | $4 \text{ CO}_2 + 9 \text{ H}_2 \rightarrow \text{CC(=O)O} + 5 \text{ H}_2\text{O} + \text{CC=O}$ |
| 90_320_180 | 16    | 1     | -179.5 | 41.5  | $4 \text{ CO}_2 + 9 \text{ H}_2 \rightarrow \text{CC(=O)O} + 5 \text{ H}_2\text{O} + \text{CC=O}$ |
| 90_320_182 | 16    | 0     | -194.1 | 36.1  | $4 \text{ CO}_2 + 10 \text{ H}_2 \rightarrow 6 \text{ H}_2\text{O} + 2 \text{ CC=O}$              |
| 90_320_183 | 15    | 0     | -194.1 | 36.1  | $4 \text{ CO}_2 + 10 \text{ H}_2 \rightarrow 6 \text{ H}_2\text{O} + 2 \text{ CC=O}$              |

| Label      | $n_M$ | $n_B$ | $E_C$  | $E_H$ | Net reaction                                                                                      |
|------------|-------|-------|--------|-------|---------------------------------------------------------------------------------------------------|
| 90_320_184 | 16    | 1     | -179.5 | 37.4  | $4 \text{ CO}_2 + 9 \text{ H}_2 \rightarrow \text{CC(=O)O} + 5 \text{ H}_2\text{O} + \text{CC=O}$ |
| 90_320_185 | 16    | 1     | -179.5 | 42.1  | $4 \text{ CO}_2 + 9 \text{ H}_2 \rightarrow \text{CC(=O)O} + 5 \text{ H}_2\text{O} + \text{CC=O}$ |
| 90_320_186 | 16    | 1     | -179.5 | 42.1  | $4 \text{ CO}_2 + 9 \text{ H}_2 \rightarrow \text{CC(=O)O} + 5 \text{ H}_2\text{O} + \text{CC=O}$ |
| 90_320_188 | 16    | 0     | -194.1 | 36.1  | $4 \text{ CO}_2 + 10 \text{ H}_2 \rightarrow 6 \text{ H}_2\text{O} + 2 \text{ CC=O}$              |
| 90_320_189 | 15    | 0     | -194.1 | 36.1  | $4 \text{ CO}_2 + 10 \text{ H}_2 \rightarrow 6 \text{ H}_2\text{O} + 2 \text{ CC=O}$              |
| 90_320_190 | 16    | 1     | -179.5 | 37.4  | $4 \text{ CO}_2 + 9 \text{ H}_2 \rightarrow \text{CC(=O)O} + 5 \text{ H}_2\text{O} + \text{CC=O}$ |
| 90_320_191 | 16    | 1     | -179.5 | 42.1  | $4 \text{ CO}_2 + 9 \text{ H}_2 \rightarrow \text{CC(=O)O} + 5 \text{ H}_2\text{O} + \text{CC=O}$ |
| 90_320_192 | 16    | 1     | -179.5 | 42.1  | $4 \text{ CO}_2 + 9 \text{ H}_2 \rightarrow \text{CC(=O)O} + 5 \text{ H}_2\text{O} + \text{CC=O}$ |
| 90_320_194 | 16    | 0     | -194.1 | 36.1  | $4 \text{ CO}_2 + 10 \text{ H}_2 \rightarrow 6 \text{ H}_2\text{O} + 2 \text{ CC=O}$              |
| 90_320_195 | 15    | 0     | -194.1 | 36.1  | $4 \text{ CO}_2 + 10 \text{ H}_2 \rightarrow 6 \text{ H}_2\text{O} + 2 \text{ CC=O}$              |
| 90_320_196 | 16    | 1     | -179.5 | 37.4  | $4 \text{ CO}_2 + 9 \text{ H}_2 \rightarrow \text{CC(=O)O} + 5 \text{ H}_2\text{O} + \text{CC=O}$ |
| 90_320_197 | 16    | 1     | -179.5 | 42.1  | $4 \text{ CO}_2 + 9 \text{ H}_2 \rightarrow \text{CC(=O)O} + 5 \text{ H}_2\text{O} + \text{CC=O}$ |
| 90_320_198 | 16    | 1     | -179.5 | 42.1  | $4 \text{ CO}_2 + 9 \text{ H}_2 \rightarrow \text{CC(=O)O} + 5 \text{ H}_2\text{O} + \text{CC=O}$ |
| 90_320_200 | 16    | 0     | -194.1 | 36.1  | $4 \text{ CO}_2 + 10 \text{ H}_2 \rightarrow 6 \text{ H}_2\text{O} + 2 \text{ CC=O}$              |
| 90_320_201 | 16    | 0     | -194.1 | 36.1  | $4 \text{ CO}_2 + 10 \text{ H}_2 \rightarrow 6 \text{ H}_2\text{O} + 2 \text{ CC=O}$              |
| 90_320_202 | 16    | 1     | -179.5 | 37.4  | $4 \text{ CO}_2 + 9 \text{ H}_2 \rightarrow \text{CC(=O)O} + 5 \text{ H}_2\text{O} + \text{CC=O}$ |
| 90_320_203 | 16    | 1     | -179.5 | 42.1  | $4 \text{ CO}_2 + 9 \text{ H}_2 \rightarrow \text{CC(=O)O} + 5 \text{ H}_2\text{O} + \text{CC=O}$ |
| 90_320_204 | 16    | 1     | -179.5 | 42.1  | $4 \text{ CO}_2 + 9 \text{ H}_2 \rightarrow \text{CC(=O)O} + 5 \text{ H}_2\text{O} + \text{CC=O}$ |

| Label      | $n_M$ | $n_B$ | $E_C$  | $E_H$ | Net reaction                                                                                                                            |
|------------|-------|-------|--------|-------|-----------------------------------------------------------------------------------------------------------------------------------------|
| 90_320_206 | 16    | 0     | -194.1 | 36.1  | $4 \text{ CO}_2 + 10 \text{ H}_2 \rightarrow 6 \text{ H}_2\text{O} + 2 \text{ CC}=\text{O}$                                             |
| 90_320_207 | 16    | 0     | -194.1 | 36.1  | $4 \text{ CO}_2 + 10 \text{ H}_2 \rightarrow 6 \text{ H}_2\text{O} + 2 \text{ CC}=\text{O}$                                             |
| 90_320_208 | 16    | 1     | -179.5 | 37.4  | $4 \text{ CO}_2 + 9 \text{ H}_2 \rightarrow \text{CC}(=\text{O})\text{O} + 5 \text{ H}_2\text{O} + \text{CC}=\text{O}$                  |
| 90_320_209 | 16    | 1     | -179.5 | 42.1  | $4 \text{ CO}_2 + 9 \text{ H}_2 \rightarrow \text{CC}(=\text{O})\text{O} + 5 \text{ H}_2\text{O} + \text{CC}=\text{O}$                  |
| 90_320_210 | 16    | 1     | -179.5 | 42.1  | $4 \text{ CO}_2 + 9 \text{ H}_2 \rightarrow \text{CC}(=\text{O})\text{O} + 5 \text{ H}_2\text{O} + \text{CC}=\text{O}$                  |
| 90_320_212 | 16    | 0     | -194.1 | 36.1  | $4 \text{ CO}_2 + 10 \text{ H}_2 \rightarrow 6 \text{ H}_2\text{O} + 2 \text{ CC}=\text{O}$                                             |
| 90_320_213 | 16    | 0     | -194.1 | 36.1  | $4 \text{ CO}_2 + 10 \text{ H}_2 \rightarrow 6 \text{ H}_2\text{O} + 2 \text{ CC}=\text{O}$                                             |
| 90_320_214 | 16    | 1     | -179.5 | 37.4  | $4 \text{ CO}_2 + 9 \text{ H}_2 \rightarrow \text{CC}(=\text{O})\text{O} + 5 \text{ H}_2\text{O} + \text{CC}=\text{O}$                  |
| 90_320_215 | 16    | 1     | -179.5 | 42.1  | $4 \text{ CO}_2 + 9 \text{ H}_2 \rightarrow \text{CC}(=\text{O})\text{O} + 5 \text{ H}_2\text{O} + \text{CC}=\text{O}$                  |
| 90_320_216 | 16    | 1     | -179.5 | 42.1  | $4 \text{ CO}_2 + 9 \text{ H}_2 \rightarrow \text{CC}(=\text{O})\text{O} + 5 \text{ H}_2\text{O} + \text{CC}=\text{O}$                  |
| 90_327_1   | 5     | 0     | -40.7  | 45.4  | $2 \text{ CO}_2 + 3 \text{ H}_2 \rightarrow \text{H}_2\text{O} + \text{OCC}(=\text{O})\text{O}$                                         |
| 90_327_2   | 5     | 1     | -40.7  | 45.4  | $3 \text{ H}_2 + 2 \text{ CO}_2 \rightarrow \text{OCC}(=\text{O})\text{O} + \text{O}$                                                   |
| 90_327_3   | 5     | 0     | -40.7  | 45.1  | $2 \text{ CO}_2 + 3 \text{ H}_2 \rightarrow \text{H}_2\text{O} + \text{OCC}(=\text{O})\text{O}$                                         |
| 90_327_4   | 5     | 0     | -40.7  | 43.9  | $2 \text{ CO}_2 + 3 \text{ H}_2 \rightarrow \text{H}_2\text{O} + \text{OCC}(=\text{O})\text{O}$                                         |
| 90_327_5   | 5     | 1     | -40.7  | 39.5  | $3 \text{ H}_2 + 2 \text{ CO}_2 \rightarrow \text{OCC}(=\text{O})\text{O} + \text{O}$                                                   |
| 90_327_6   | 5     | 0     | -40.7  | 45.7  | $2 \text{ CO}_2 + 3 \text{ H}_2 \rightarrow \text{H}_2\text{O} + \text{OCC}(=\text{O})\text{O}$                                         |
| 90_338_1   | 10    | 1     | -101.4 | 50.8  | $4 \text{ CO}_2 + 6 \text{ H}_2 \rightarrow \text{OC}(=\text{O})\text{CC}(\text{C}(=\text{O})\text{O})\text{O} + 3 \text{ H}_2\text{O}$ |
| 90_338_2   | 10    | 1     | -101.4 | 50.8  | $6 \text{ H}_2 + 4 \text{ CO}_2 \rightarrow \text{OC}(=\text{O})\text{CC}(\text{C}(=\text{O})\text{O})\text{O} + 3 \text{ H}_2\text{O}$ |

| Label     | $n_M$ | $n_B$ | $E_C$  | $E_H$ | Net reaction                                                                                      |
|-----------|-------|-------|--------|-------|---------------------------------------------------------------------------------------------------|
| 90_338_3  | 10    | 1     | -101.4 | 50.8  | $4 \text{ CO}_2 + 6 \text{ H}_2 \rightarrow \text{OC(=O)CC(C(=O)O)O} + 3 \text{ H}_2\text{O}$     |
| 90_338_4  | 10    | 1     | -101.4 | 50.8  | $4 \text{ CO}_2 + 6 \text{ H}_2 \rightarrow \text{OC(=O)CC(C(=O)O)O} + 3 \text{ H}_2\text{O}$     |
| 90_338_5  | 10    | 1     | -101.4 | 50.8  | $6 \text{ H}_2 + 4 \text{ CO}_2 \rightarrow \text{OC(=O)CC(C(=O)O)O} + 3 \text{ H}_2\text{O}$     |
| 90_338_6  | 10    | 1     | -101.4 | 52.6  | $4 \text{ CO}_2 + 6 \text{ H}_2 \rightarrow \text{OC(=O)CC(C(=O)O)O} + 3 \text{ H}_2\text{O}$     |
| 90_355_1  | 14    | 0     | -194.1 | 32.9  | $4 \text{ CO}_2 + 10 \text{ H}_2 \rightarrow 6 \text{ H}_2\text{O} + 2 \text{ CC=O}$              |
| 90_355_6  | 14    | 0     | -194.1 | 32.9  | $4 \text{ CO}_2 + 10 \text{ H}_2 \rightarrow 6 \text{ H}_2\text{O} + 2 \text{ CC=O}$              |
| 90_355_11 | 14    | 0     | -194.1 | 32.9  | $4 \text{ CO}_2 + 10 \text{ H}_2 \rightarrow 6 \text{ H}_2\text{O} + 2 \text{ CC=O}$              |
| 90_355_16 | 16    | 0     | -194.1 | 30.2  | $4 \text{ CO}_2 + 10 \text{ H}_2 \rightarrow 6 \text{ H}_2\text{O} + 2 \text{ CC=O}$              |
| 90_355_17 | 16    | 0     | -194.1 | 30.2  | $4 \text{ CO}_2 + 10 \text{ H}_2 \rightarrow 6 \text{ H}_2\text{O} + 2 \text{ CC=O}$              |
| 90_355_18 | 16    | 1     | -179.5 | 34.4  | $4 \text{ CO}_2 + 9 \text{ H}_2 \rightarrow \text{CC(=O)O} + 5 \text{ H}_2\text{O} + \text{CC=O}$ |
| 90_355_19 | 16    | 1     | -179.5 | 39.1  | $4 \text{ CO}_2 + 9 \text{ H}_2 \rightarrow \text{CC(=O)O} + 5 \text{ H}_2\text{O} + \text{CC=O}$ |
| 90_355_20 | 16    | 1     | -179.5 | 39.1  | $4 \text{ CO}_2 + 9 \text{ H}_2 \rightarrow \text{CC(=O)O} + 5 \text{ H}_2\text{O} + \text{CC=O}$ |
| 90_355_21 | 16    | 0     | -194.1 | 28.6  | $4 \text{ CO}_2 + 10 \text{ H}_2 \rightarrow 6 \text{ H}_2\text{O} + 2 \text{ CC=O}$              |
| 90_355_22 | 16    | 0     | -194.1 | 28.6  | $4 \text{ CO}_2 + 10 \text{ H}_2 \rightarrow 6 \text{ H}_2\text{O} + 2 \text{ CC=O}$              |
| 90_355_23 | 16    | 1     | -179.5 | 32.7  | $4 \text{ CO}_2 + 9 \text{ H}_2 \rightarrow \text{CC(=O)O} + 5 \text{ H}_2\text{O} + \text{CC=O}$ |
| 90_355_24 | 16    | 1     | -179.5 | 37.5  | $4 \text{ CO}_2 + 9 \text{ H}_2 \rightarrow \text{CC(=O)O} + 5 \text{ H}_2\text{O} + \text{CC=O}$ |
| 90_355_25 | 16    | 1     | -179.5 | 37.5  | $4 \text{ CO}_2 + 9 \text{ H}_2 \rightarrow \text{CC(=O)O} + 5 \text{ H}_2\text{O} + \text{CC=O}$ |
| 90_355_26 | 16    | 0     | -194.1 | 27.9  | $4 \text{ CO}_2 + 10 \text{ H}_2 \rightarrow 6 \text{ H}_2\text{O} + 2 \text{ CC=O}$              |

| Label     | $n_M$ | $n_B$ | $E_C$  | $E_H$ | Net reaction                                                                                                            |
|-----------|-------|-------|--------|-------|-------------------------------------------------------------------------------------------------------------------------|
| 90_355_27 | 16    | 0     | -194.1 | 27.9  | $4 \text{ CO}_2 + 10 \text{ H}_2 \rightarrow 6 \text{ H}_2\text{O} + 2 \text{ CC}=\text{O}$                             |
| 90_355_28 | 16    | 1     | -179.5 | 32.1  | $4 \text{ CO}_2 + 9 \text{ H}_2 \rightarrow \text{CC}(=\text{O})\text{O} + 5 \text{ H}_2\text{O} + \text{CC}=\text{O}$  |
| 90_355_29 | 16    | 1     | -179.5 | 36.8  | $4 \text{ CO}_2 + 9 \text{ H}_2 \rightarrow \text{CC}(=\text{O})\text{O} + 5 \text{ H}_2\text{O} + \text{CC}=\text{O}$  |
| 90_355_30 | 16    | 1     | -179.5 | 36.8  | $4 \text{ CO}_2 + 9 \text{ H}_2 \rightarrow \text{CC}(=\text{O})\text{O} + 5 \text{ H}_2\text{O} + \text{CC}=\text{O}$  |
| 90_358_2  | 14    | 0     | -194.1 | 35.6  | $4 \text{ CO}_2 + 10 \text{ H}_2 \rightarrow 6 \text{ H}_2\text{O} + 2 \text{ CC}=\text{O}$                             |
| 90_358_8  | 14    | 0     | -194.1 | 35.6  | $4 \text{ CO}_2 + 10 \text{ H}_2 \rightarrow 6 \text{ H}_2\text{O} + 2 \text{ CC}=\text{O}$                             |
| 90_358_14 | 14    | 0     | -194.1 | 35.6  | $4 \text{ CO}_2 + 10 \text{ H}_2 \rightarrow 6 \text{ H}_2\text{O} + 2 \text{ CC}=\text{O}$                             |
| 90_370_1  | 14    | 0     | -155.0 | 34.5  | $4 \text{ CO}_2 + 9 \text{ H}_2 \rightarrow 5 \text{ H}_2\text{O} + \text{CC}=\text{O} + \text{OCC}=\text{O}$           |
| 90_370_2  | 14    | 0     | -155.0 | 34.5  | $4 \text{ CO}_2 + 9 \text{ H}_2 \rightarrow 5 \text{ H}_2\text{O} + \text{CC}=\text{O} + \text{OCC}=\text{O}$           |
| 90_370_3  | 14    | 1     | -140.5 | 34.5  | $4 \text{ CO}_2 + 8 \text{ H}_2 \rightarrow \text{CC}(=\text{O})\text{O} + 4 \text{ H}_2\text{O} + \text{OCC}=\text{O}$ |
| 90_370_4  | 14    | 1     | -140.5 | 39.1  | $4 \text{ CO}_2 + 8 \text{ H}_2 \rightarrow \text{CC}(=\text{O})\text{O} + 4 \text{ H}_2\text{O} + \text{OCC}=\text{O}$ |
| 90_370_5  | 14    | 1     | -140.5 | 39.1  | $4 \text{ CO}_2 + 8 \text{ H}_2 \rightarrow \text{CC}(=\text{O})\text{O} + 4 \text{ H}_2\text{O} + \text{OCC}=\text{O}$ |
| 90_370_7  | 14    | 0     | -155.0 | 32.9  | $4 \text{ CO}_2 + 9 \text{ H}_2 \rightarrow 5 \text{ H}_2\text{O} + \text{CC}=\text{O} + \text{OCC}=\text{O}$           |
| 90_370_8  | 14    | 0     | -155.0 | 32.9  | $4 \text{ CO}_2 + 9 \text{ H}_2 \rightarrow 5 \text{ H}_2\text{O} + \text{CC}=\text{O} + \text{OCC}=\text{O}$           |
| 90_370_9  | 14    | 1     | -140.5 | 32.9  | $4 \text{ CO}_2 + 8 \text{ H}_2 \rightarrow \text{CC}(=\text{O})\text{O} + 4 \text{ H}_2\text{O} + \text{OCC}=\text{O}$ |
| 90_370_10 | 14    | 1     | -140.5 | 37.5  | $4 \text{ CO}_2 + 8 \text{ H}_2 \rightarrow \text{CC}(=\text{O})\text{O} + 4 \text{ H}_2\text{O} + \text{OCC}=\text{O}$ |
| 90_370_11 | 14    | 1     | -140.5 | 37.5  | $4 \text{ CO}_2 + 8 \text{ H}_2 \rightarrow \text{CC}(=\text{O})\text{O} + 4 \text{ H}_2\text{O} + \text{OCC}=\text{O}$ |
| 90_370_12 | 12    | 0     | -120.5 | 37.6  | $3 \text{ CO}_2 + 7 \text{ H}_2 \rightarrow 4 \text{ H}_2\text{O} + \text{CC}=\text{O} + \text{C}=\text{O}$             |

| Label     | $n_M$ | $n_B$ | $E_C$  | $E_H$ | Net reaction                                                                                                                                                                                                                     |
|-----------|-------|-------|--------|-------|----------------------------------------------------------------------------------------------------------------------------------------------------------------------------------------------------------------------------------|
| 90_370_13 | 14    | 0     | -155.0 | 32.2  | $4 \text{ CO}_2 + 9 \text{ H}_2 \rightarrow 5 \text{ H}_2\text{O} + \text{CC}=\text{O} + \text{OCC}=\text{O}$                                                                                                                    |
| 90_370_14 | 14    | 0     | -155.0 | 32.2  | $4 \text{ CO}_2 + 9 \text{ H}_2 \rightarrow 5 \text{ H}_2\text{O} + \text{CC}=\text{O} + \text{OCC}=\text{O}$                                                                                                                    |
| 90_370_15 | 14    | 1     | -140.5 | 32.2  | $4 \text{ CO}_2 + 8 \text{ H}_2 \rightarrow \text{CC}(=\text{O})\text{O} + 4 \text{ H}_2\text{O} + \text{OCC}=\text{O}$                                                                                                          |
| 90_370_16 | 14    | 1     | -140.5 | 36.8  | $4 \text{ CO}_2 + 8 \text{ H}_2 \rightarrow \text{CC}(=\text{O})\text{O} + 4 \text{ H}_2\text{O} + \text{OCC}=\text{O}$                                                                                                          |
| 90_370_17 | 14    | 1     | -140.5 | 36.8  | $4 \text{ CO}_2 + 8 \text{ H}_2 \rightarrow \text{CC}(=\text{O})\text{O} + 4 \text{ H}_2\text{O} + \text{OCC}=\text{O}$                                                                                                          |
| 90_373_1  | 11    | 0     | -103.9 | 50.8  | $4 \text{ CO}_2 + 6 \text{ H}_2 \rightarrow 4 \text{ H}_2\text{O} + \text{OC}(=\text{O})\text{C}=\text{CC}(=\text{O})\text{O}$                                                                                                   |
| 90_373_2  | 11    | 0     | -103.9 | 50.8  | $6 \text{ H}_2 + 4 \text{ CO}_2 \rightarrow 4 \text{ H}_2\text{O} + \text{OC}(=\text{O})\text{C}=\text{CC}(=\text{O})\text{O}$                                                                                                   |
| 90_373_3  | 11    | 0     | -103.9 | 50.8  | $4 \text{ CO}_2 + 6 \text{ H}_2 \rightarrow 4 \text{ H}_2\text{O} + \text{OC}(=\text{O})\text{C}=\text{CC}(=\text{O})\text{O}$                                                                                                   |
| 90_373_4  | 11    | 0     | -103.9 | 50.8  | $4 \text{ CO}_2 + 6 \text{ H}_2 \rightarrow 4 \text{ H}_2\text{O} + \text{OC}(=\text{O})\text{C}=\text{CC}(=\text{O})\text{O}$                                                                                                   |
| 90_373_5  | 11    | 0     | -103.9 | 50.8  | $6 \text{ H}_2 + 4 \text{ CO}_2 \rightarrow 4 \text{ H}_2\text{O} + \text{OC}(=\text{O})\text{C}=\text{CC}(=\text{O})\text{O}$                                                                                                   |
| 90_373_6  | 11    | 0     | -103.9 | 52.6  | $4 \text{ CO}_2 + 6 \text{ H}_2 \rightarrow 4 \text{ H}_2\text{O} + \text{OC}(=\text{O})\text{C}=\text{CC}(=\text{O})\text{O}$                                                                                                   |
| 90_387_2  | 18    | 0     | -181.7 | 48.0  | $4 \text{ CO}_2 + 10 \text{ H}_2 \rightarrow 6 \text{ H}_2\text{O} + \text{CCC}=\text{O} + \text{C}=\text{O}$                                                                                                                    |
| 90_387_3  | 16    | 0     | -194.1 | 48.0  | $4 \text{ CO}_2 + 10 \text{ H}_2 \rightarrow 6 \text{ H}_2\text{O} + 2 \text{ CC}=\text{O}$                                                                                                                                      |
| 90_387_4  | 17    | 0     | -194.1 | 48.0  | $4 \text{ CO}_2 + 10 \text{ H}_2 \rightarrow 6 \text{ H}_2\text{O} + 2 \text{ CC}=\text{O}$                                                                                                                                      |
| 90_387_6  | 16    | 0     | -190.3 | 48.0  | $3 \text{ CO}_2 + 9 \text{ H}_2 + \text{CC}(\text{C}(=\text{O})\text{C}(=\text{O})\text{O})\text{O} \rightarrow$<br>$\rightarrow \text{OC}(=\text{O})\text{C}(\text{O})\text{C} + 5 \text{ H}_2\text{O} + 2 \text{ CC}=\text{O}$ |
| 90_387_8  | 18    | 1     | -179.5 | 48.0  | $4 \text{ CO}_2 + 9 \text{ H}_2 \rightarrow \text{CC}(=\text{O})\text{O} + 5 \text{ H}_2\text{O} + \text{CC}=\text{O}$                                                                                                           |
| 90_387_10 | 18    | 1     | -179.5 | 48.0  | $4 \text{ CO}_2 + 9 \text{ H}_2 \rightarrow \text{CC}(=\text{O})\text{O} + 5 \text{ H}_2\text{O} + \text{CC}=\text{O}$                                                                                                           |

| Label     | $n_M$ | $n_B$ | $E_C$  | $E_H$ | Net reaction                                                                                                                                                                                                                     |
|-----------|-------|-------|--------|-------|----------------------------------------------------------------------------------------------------------------------------------------------------------------------------------------------------------------------------------|
| 90.387.12 | 18    | 1     | -179.5 | 48.0  | $4 \text{ CO}_2 + 9 \text{ H}_2 \rightarrow \text{CC}(=\text{O})\text{O} + 5 \text{ H}_2\text{O} + \text{CC}=\text{O}$                                                                                                           |
| 90.387.13 | 16    | 0     | -181.7 | 48.0  | $4 \text{ CO}_2 + 10 \text{ H}_2 \rightarrow 6 \text{ H}_2\text{O} + \text{CCC}=\text{O} + \text{C}=\text{O}$                                                                                                                    |
| 90.387.14 | 17    | 0     | -181.7 | 48.0  | $4 \text{ CO}_2 + 10 \text{ H}_2 \rightarrow 6 \text{ H}_2\text{O} + \text{CCC}=\text{O} + \text{C}=\text{O}$                                                                                                                    |
| 90.387.15 | 16    | 0     | -194.1 | 48.0  | $4 \text{ CO}_2 + 10 \text{ H}_2 \rightarrow 6 \text{ H}_2\text{O} + 2 \text{ CC}=\text{O}$                                                                                                                                      |
| 90.387.16 | 17    | 0     | -194.1 | 48.0  | $4 \text{ CO}_2 + 10 \text{ H}_2 \rightarrow 6 \text{ H}_2\text{O} + 2 \text{ CC}=\text{O}$                                                                                                                                      |
| 90.387.18 | 16    | 0     | -190.3 | 48.0  | $3 \text{ CO}_2 + 9 \text{ H}_2 + \text{CC}(\text{C}(=\text{O})\text{C}(=\text{O})\text{O})\text{O} \rightarrow$<br>$\rightarrow \text{OC}(=\text{O})\text{C}(\text{O})\text{C} + 5 \text{ H}_2\text{O} + 2 \text{ CC}=\text{O}$ |
| 90.387.20 | 18    | 1     | -179.5 | 48.0  | $4 \text{ CO}_2 + 9 \text{ H}_2 \rightarrow \text{CC}(=\text{O})\text{O} + 5 \text{ H}_2\text{O} + \text{CC}=\text{O}$                                                                                                           |
| 90.387.22 | 18    | 1     | -179.5 | 48.0  | $4 \text{ CO}_2 + 9 \text{ H}_2 \rightarrow \text{CC}(=\text{O})\text{O} + 5 \text{ H}_2\text{O} + \text{CC}=\text{O}$                                                                                                           |
| 90.387.24 | 18    | 1     | -179.5 | 48.0  | $4 \text{ CO}_2 + 9 \text{ H}_2 \rightarrow \text{CC}(=\text{O})\text{O} + 5 \text{ H}_2\text{O} + \text{CC}=\text{O}$                                                                                                           |
| 90.387.26 | 16    | 0     | -175.7 | 48.0  | $9 \text{ H}_2 + 3 \text{ CO}_2 + \text{OCC}(=\text{O})\text{C}(=\text{O})\text{O} \rightarrow$<br>$\rightarrow 5 \text{ H}_2\text{O} + \text{OCC}(=\text{O})\text{O} + \text{CCC}=\text{O} + \text{C}=\text{O}$                 |
| 90.387.27 | 16    | 0     | -194.1 | 48.0  | $4 \text{ CO}_2 + 10 \text{ H}_2 \rightarrow 6 \text{ H}_2\text{O} + 2 \text{ CC}=\text{O}$                                                                                                                                      |
| 90.387.28 | 17    | 0     | -194.1 | 48.0  | $4 \text{ CO}_2 + 10 \text{ H}_2 \rightarrow 6 \text{ H}_2\text{O} + 2 \text{ CC}=\text{O}$                                                                                                                                      |
| 90.387.30 | 16    | 0     | -190.3 | 48.0  | $3 \text{ CO}_2 + 9 \text{ H}_2 + \text{CC}(\text{C}(=\text{O})\text{C}(=\text{O})\text{O})\text{O} \rightarrow$<br>$\rightarrow \text{OC}(=\text{O})\text{C}(\text{O})\text{C} + 5 \text{ H}_2\text{O} + 2 \text{ CC}=\text{O}$ |
| 90.387.32 | 18    | 1     | -179.5 | 48.0  | $4 \text{ CO}_2 + 9 \text{ H}_2 \rightarrow \text{CC}(=\text{O})\text{O} + 5 \text{ H}_2\text{O} + \text{CC}=\text{O}$                                                                                                           |
| 90.387.34 | 18    | 1     | -179.5 | 48.0  | $4 \text{ CO}_2 + 9 \text{ H}_2 \rightarrow \text{CC}(=\text{O})\text{O} + 5 \text{ H}_2\text{O} + \text{CC}=\text{O}$                                                                                                           |

| Label     | $n_M$ | $n_B$ | $E_C$  | $E_H$ | Net reaction                                                                                                                                             |
|-----------|-------|-------|--------|-------|----------------------------------------------------------------------------------------------------------------------------------------------------------|
| 90_387_36 | 18    | 1     | -179.5 | 48.0  | $4 \text{ CO}_2 + 9 \text{ H}_2 \rightarrow \text{CC(=O)O} + 5 \text{ H}_2\text{O} + \text{CC=O}$                                                        |
| 90_387_38 | 18    | 0     | -181.7 | 46.9  | $4 \text{ CO}_2 + 10 \text{ H}_2 \rightarrow 6 \text{ H}_2\text{O} + \text{CCC=O} + \text{C=O}$                                                          |
| 90_387_40 | 18    | 0     | -194.1 | 46.9  | $4 \text{ CO}_2 + 10 \text{ H}_2 \rightarrow 6 \text{ H}_2\text{O} + 2 \text{ CC=O}$                                                                     |
| 90_387_42 | 18    | 0     | -194.1 | 46.9  | $4 \text{ CO}_2 + 10 \text{ H}_2 \rightarrow 6 \text{ H}_2\text{O} + 2 \text{ CC=O}$                                                                     |
| 90_387_44 | 18    | 1     | -179.5 | 46.9  | $4 \text{ CO}_2 + 9 \text{ H}_2 \rightarrow \text{CC(=O)O} + 5 \text{ H}_2\text{O} + \text{CC=O}$                                                        |
| 90_387_46 | 18    | 1     | -179.5 | 46.9  | $4 \text{ CO}_2 + 9 \text{ H}_2 \rightarrow \text{CC(=O)O} + 5 \text{ H}_2\text{O} + \text{CC=O}$                                                        |
| 90_387_48 | 18    | 1     | -179.5 | 46.9  | $4 \text{ CO}_2 + 9 \text{ H}_2 \rightarrow \text{CC(=O)O} + 5 \text{ H}_2\text{O} + \text{CC=O}$                                                        |
| 90_387_49 | 16    | 0     | -181.7 | 46.9  | $4 \text{ CO}_2 + 10 \text{ H}_2 \rightarrow 6 \text{ H}_2\text{O} + \text{CCC=O} + \text{C=O}$                                                          |
| 90_387_50 | 17    | 0     | -181.7 | 46.9  | $4 \text{ CO}_2 + 10 \text{ H}_2 \rightarrow 6 \text{ H}_2\text{O} + \text{CCC=O} + \text{C=O}$                                                          |
| 90_387_52 | 18    | 0     | -194.1 | 46.9  | $4 \text{ CO}_2 + 10 \text{ H}_2 \rightarrow 6 \text{ H}_2\text{O} + 2 \text{ CC=O}$                                                                     |
| 90_387_54 | 18    | 0     | -194.1 | 46.9  | $4 \text{ CO}_2 + 10 \text{ H}_2 \rightarrow 6 \text{ H}_2\text{O} + 2 \text{ CC=O}$                                                                     |
| 90_387_56 | 18    | 1     | -179.5 | 46.9  | $4 \text{ CO}_2 + 9 \text{ H}_2 \rightarrow \text{CC(=O)O} + 5 \text{ H}_2\text{O} + \text{CC=O}$                                                        |
| 90_387_58 | 18    | 1     | -179.5 | 46.9  | $4 \text{ CO}_2 + 9 \text{ H}_2 \rightarrow \text{CC(=O)O} + 5 \text{ H}_2\text{O} + \text{CC=O}$                                                        |
| 90_387_60 | 18    | 1     | -179.5 | 46.9  | $4 \text{ CO}_2 + 9 \text{ H}_2 \rightarrow \text{CC(=O)O} + 5 \text{ H}_2\text{O} + \text{CC=O}$                                                        |
| 90_387_62 | 16    | 0     | -175.7 | 46.9  | $9 \text{ H}_2 + 3 \text{ CO}_2 + \text{OCC(=O)C(=O)O} \rightarrow$<br>$\rightarrow 5 \text{ H}_2\text{O} + \text{OCC(=O)O} + \text{CCC=O} + \text{C=O}$ |
| 90_387_64 | 18    | 0     | -194.1 | 46.9  | $4 \text{ CO}_2 + 10 \text{ H}_2 \rightarrow 6 \text{ H}_2\text{O} + 2 \text{ CC=O}$                                                                     |
| 90_387_66 | 18    | 0     | -194.1 | 46.9  | $4 \text{ CO}_2 + 10 \text{ H}_2 \rightarrow 6 \text{ H}_2\text{O} + 2 \text{ CC=O}$                                                                     |



| Label     | $n_M$ | $n_B$ | $E_C$  | $E_H$ | Net reaction                                                                                                                                        |
|-----------|-------|-------|--------|-------|-----------------------------------------------------------------------------------------------------------------------------------------------------|
| 90.387.68 | 18    | 1     | -179.5 | 46.9  | $4 \text{ CO}_2 + 9 \text{ H}_2 \rightarrow \text{CC(=O)O} + 5 \text{ H}_2\text{O} + \text{CC=O}$                                                   |
| 90.387.70 | 18    | 1     | -179.5 | 46.9  | $4 \text{ CO}_2 + 9 \text{ H}_2 \rightarrow \text{CC(=O)O} + 5 \text{ H}_2\text{O} + \text{CC=O}$                                                   |
| 90.387.72 | 18    | 1     | -179.5 | 46.9  | $4 \text{ CO}_2 + 9 \text{ H}_2 \rightarrow \text{CC(=O)O} + 5 \text{ H}_2\text{O} + \text{CC=O}$                                                   |
| 90.387.74 | 18    | 0     | -181.7 | 48.0  | $4 \text{ CO}_2 + 10 \text{ H}_2 \rightarrow 6 \text{ H}_2\text{O} + \text{CCC=O} + \text{C=O}$                                                     |
| 90.387.75 | 16    | 0     | -194.1 | 48.0  | $4 \text{ CO}_2 + 10 \text{ H}_2 \rightarrow 6 \text{ H}_2\text{O} + 2 \text{ CC=O}$                                                                |
| 90.387.76 | 17    | 0     | -194.1 | 48.0  | $4 \text{ CO}_2 + 10 \text{ H}_2 \rightarrow 6 \text{ H}_2\text{O} + 2 \text{ CC=O}$                                                                |
| 90.387.78 | 16    | 0     | -190.3 | 48.0  | $3 \text{ CO}_2 + 9 \text{ H}_2 + \text{CC(C(=O)C(=O)O)O} \rightarrow$<br>$\rightarrow \text{OC(=O)C(O)C} + 5 \text{ H}_2\text{O} + 2 \text{ CC=O}$ |
| 90.387.80 | 18    | 1     | -179.5 | 48.0  | $4 \text{ CO}_2 + 9 \text{ H}_2 \rightarrow \text{CC(=O)O} + 5 \text{ H}_2\text{O} + \text{CC=O}$                                                   |
| 90.387.82 | 18    | 1     | -179.5 | 48.0  | $4 \text{ CO}_2 + 9 \text{ H}_2 \rightarrow \text{CC(=O)O} + 5 \text{ H}_2\text{O} + \text{CC=O}$                                                   |
| 90.387.84 | 18    | 1     | -179.5 | 48.0  | $4 \text{ CO}_2 + 9 \text{ H}_2 \rightarrow \text{CC(=O)O} + 5 \text{ H}_2\text{O} + \text{CC=O}$                                                   |
| 90.387.85 | 16    | 0     | -181.7 | 48.0  | $4 \text{ CO}_2 + 10 \text{ H}_2 \rightarrow 6 \text{ H}_2\text{O} + \text{CCC=O} + \text{C=O}$                                                     |
| 90.387.86 | 17    | 0     | -181.7 | 48.0  | $4 \text{ CO}_2 + 10 \text{ H}_2 \rightarrow 6 \text{ H}_2\text{O} + \text{CCC=O} + \text{C=O}$                                                     |
| 90.387.87 | 16    | 0     | -194.1 | 48.0  | $4 \text{ CO}_2 + 10 \text{ H}_2 \rightarrow 6 \text{ H}_2\text{O} + 2 \text{ CC=O}$                                                                |
| 90.387.88 | 17    | 0     | -194.1 | 48.0  | $4 \text{ CO}_2 + 10 \text{ H}_2 \rightarrow 6 \text{ H}_2\text{O} + 2 \text{ CC=O}$                                                                |
| 90.387.90 | 16    | 0     | -190.3 | 48.0  | $3 \text{ CO}_2 + 9 \text{ H}_2 + \text{CC(C(=O)C(=O)O)O} \rightarrow$<br>$\rightarrow \text{OC(=O)C(O)C} + 5 \text{ H}_2\text{O} + 2 \text{ CC=O}$ |
| 90.387.92 | 18    | 1     | -179.5 | 48.0  | $4 \text{ CO}_2 + 9 \text{ H}_2 \rightarrow \text{CC(=O)O} + 5 \text{ H}_2\text{O} + \text{CC=O}$                                                   |

| Label      | $n_M$ | $n_B$ | $E_C$  | $E_H$ | Net reaction                                                                                                                                             |
|------------|-------|-------|--------|-------|----------------------------------------------------------------------------------------------------------------------------------------------------------|
| 90_387_94  | 18    | 1     | -179.5 | 48.0  | $4 \text{ CO}_2 + 9 \text{ H}_2 \rightarrow \text{CC(=O)O} + 5 \text{ H}_2\text{O} + \text{CC=O}$                                                        |
| 90_387_96  | 18    | 1     | -179.5 | 48.0  | $4 \text{ CO}_2 + 9 \text{ H}_2 \rightarrow \text{CC(=O)O} + 5 \text{ H}_2\text{O} + \text{CC=O}$                                                        |
| 90_387_98  | 16    | 0     | -175.7 | 48.0  | $9 \text{ H}_2 + 3 \text{ CO}_2 + \text{OCC(=O)C(=O)O} \rightarrow$<br>$\rightarrow 5 \text{ H}_2\text{O} + \text{OCC(=O)O} + \text{CCC=O} + \text{C=O}$ |
| 90_387_99  | 16    | 0     | -194.1 | 48.0  | $4 \text{ CO}_2 + 10 \text{ H}_2 \rightarrow 6 \text{ H}_2\text{O} + 2 \text{ CC=O}$                                                                     |
| 90_387_100 | 17    | 0     | -194.1 | 48.0  | $4 \text{ CO}_2 + 10 \text{ H}_2 \rightarrow 6 \text{ H}_2\text{O} + 2 \text{ CC=O}$                                                                     |
| 90_387_102 | 16    | 0     | -190.3 | 48.0  | $3 \text{ CO}_2 + 9 \text{ H}_2 + \text{CC(C(=O)C(=O)O)O} \rightarrow$<br>$\rightarrow \text{OC(=O)C(O)C} + 5 \text{ H}_2\text{O} + 2 \text{ CC=O}$      |
| 90_387_104 | 18    | 1     | -179.5 | 48.0  | $4 \text{ CO}_2 + 9 \text{ H}_2 \rightarrow \text{CC(=O)O} + 5 \text{ H}_2\text{O} + \text{CC=O}$                                                        |
| 90_387_106 | 18    | 1     | -179.5 | 48.0  | $4 \text{ CO}_2 + 9 \text{ H}_2 \rightarrow \text{CC(=O)O} + 5 \text{ H}_2\text{O} + \text{CC=O}$                                                        |
| 90_387_108 | 18    | 1     | -179.5 | 48.0  | $4 \text{ CO}_2 + 9 \text{ H}_2 \rightarrow \text{CC(=O)O} + 5 \text{ H}_2\text{O} + \text{CC=O}$                                                        |
| 90_387_110 | 18    | 0     | -181.7 | 46.9  | $4 \text{ CO}_2 + 10 \text{ H}_2 \rightarrow 6 \text{ H}_2\text{O} + \text{CCC=O} + \text{C=O}$                                                          |
| 90_387_112 | 18    | 0     | -194.1 | 46.9  | $4 \text{ CO}_2 + 10 \text{ H}_2 \rightarrow 6 \text{ H}_2\text{O} + 2 \text{ CC=O}$                                                                     |
| 90_387_114 | 18    | 0     | -194.1 | 46.9  | $4 \text{ CO}_2 + 10 \text{ H}_2 \rightarrow 6 \text{ H}_2\text{O} + 2 \text{ CC=O}$                                                                     |
| 90_387_116 | 18    | 1     | -179.5 | 46.9  | $4 \text{ CO}_2 + 9 \text{ H}_2 \rightarrow \text{CC(=O)O} + 5 \text{ H}_2\text{O} + \text{CC=O}$                                                        |
| 90_387_118 | 18    | 1     | -179.5 | 46.9  | $4 \text{ CO}_2 + 9 \text{ H}_2 \rightarrow \text{CC(=O)O} + 5 \text{ H}_2\text{O} + \text{CC=O}$                                                        |
| 90_387_120 | 18    | 1     | -179.5 | 46.9  | $4 \text{ CO}_2 + 9 \text{ H}_2 \rightarrow \text{CC(=O)O} + 5 \text{ H}_2\text{O} + \text{CC=O}$                                                        |
| 90_387_121 | 16    | 0     | -181.7 | 46.9  | $4 \text{ CO}_2 + 10 \text{ H}_2 \rightarrow 6 \text{ H}_2\text{O} + \text{CCC=O} + \text{C=O}$                                                          |

| Label      | $n_M$ | $n_B$ | $E_C$  | $E_H$ | Net reaction                                                                                                                                                                                                     |
|------------|-------|-------|--------|-------|------------------------------------------------------------------------------------------------------------------------------------------------------------------------------------------------------------------|
| 90.387.122 | 17    | 0     | -181.7 | 46.9  | $4 \text{ CO}_2 + 10 \text{ H}_2 \rightarrow 6 \text{ H}_2\text{O} + \text{CCC}=\text{O} + \text{C}=\text{O}$                                                                                                    |
| 90.387.124 | 18    | 0     | -194.1 | 46.9  | $4 \text{ CO}_2 + 10 \text{ H}_2 \rightarrow 6 \text{ H}_2\text{O} + 2 \text{ CC}=\text{O}$                                                                                                                      |
| 90.387.126 | 18    | 0     | -194.1 | 46.9  | $4 \text{ CO}_2 + 10 \text{ H}_2 \rightarrow 6 \text{ H}_2\text{O} + 2 \text{ CC}=\text{O}$                                                                                                                      |
| 90.387.128 | 18    | 1     | -179.5 | 46.9  | $4 \text{ CO}_2 + 9 \text{ H}_2 \rightarrow \text{CC}(=\text{O})\text{O} + 5 \text{ H}_2\text{O} + \text{CC}=\text{O}$                                                                                           |
| 90.387.130 | 18    | 1     | -179.5 | 46.9  | $4 \text{ CO}_2 + 9 \text{ H}_2 \rightarrow \text{CC}(=\text{O})\text{O} + 5 \text{ H}_2\text{O} + \text{CC}=\text{O}$                                                                                           |
| 90.387.132 | 18    | 1     | -179.5 | 46.9  | $4 \text{ CO}_2 + 9 \text{ H}_2 \rightarrow \text{CC}(=\text{O})\text{O} + 5 \text{ H}_2\text{O} + \text{CC}=\text{O}$                                                                                           |
| 90.387.134 | 16    | 0     | -175.7 | 46.9  | $9 \text{ H}_2 + 3 \text{ CO}_2 + \text{OCC}(=\text{O})\text{C}(=\text{O})\text{O} \rightarrow$<br>$\rightarrow 5 \text{ H}_2\text{O} + \text{OCC}(=\text{O})\text{O} + \text{CCC}=\text{O} + \text{C}=\text{O}$ |
| 90.387.136 | 18    | 0     | -194.1 | 46.9  | $4 \text{ CO}_2 + 10 \text{ H}_2 \rightarrow 6 \text{ H}_2\text{O} + 2 \text{ CC}=\text{O}$                                                                                                                      |
| 90.387.138 | 18    | 0     | -194.1 | 46.9  | $4 \text{ CO}_2 + 10 \text{ H}_2 \rightarrow 6 \text{ H}_2\text{O} + 2 \text{ CC}=\text{O}$                                                                                                                      |
| 90.387.140 | 18    | 1     | -179.5 | 46.9  | $4 \text{ CO}_2 + 9 \text{ H}_2 \rightarrow \text{CC}(=\text{O})\text{O} + 5 \text{ H}_2\text{O} + \text{CC}=\text{O}$                                                                                           |
| 90.387.142 | 18    | 1     | -179.5 | 46.9  | $4 \text{ CO}_2 + 9 \text{ H}_2 \rightarrow \text{CC}(=\text{O})\text{O} + 5 \text{ H}_2\text{O} + \text{CC}=\text{O}$                                                                                           |
| 90.387.144 | 18    | 1     | -179.5 | 46.9  | $4 \text{ CO}_2 + 9 \text{ H}_2 \rightarrow \text{CC}(=\text{O})\text{O} + 5 \text{ H}_2\text{O} + \text{CC}=\text{O}$                                                                                           |
| 90.387.146 | 18    | 0     | -181.7 | 48.0  | $4 \text{ CO}_2 + 10 \text{ H}_2 \rightarrow 6 \text{ H}_2\text{O} + \text{CCC}=\text{O} + \text{C}=\text{O}$                                                                                                    |
| 90.387.148 | 18    | 0     | -194.1 | 48.0  | $4 \text{ CO}_2 + 10 \text{ H}_2 \rightarrow 6 \text{ H}_2\text{O} + 2 \text{ CC}=\text{O}$                                                                                                                      |
| 90.387.149 | 16    | 0     | -194.1 | 48.0  | $4 \text{ CO}_2 + 10 \text{ H}_2 \rightarrow 6 \text{ H}_2\text{O} + 2 \text{ CC}=\text{O}$                                                                                                                      |
| 90.387.150 | 17    | 0     | -194.1 | 48.0  | $4 \text{ CO}_2 + 10 \text{ H}_2 \rightarrow 6 \text{ H}_2\text{O} + 2 \text{ CC}=\text{O}$                                                                                                                      |
| 90.387.152 | 18    | 1     | -179.5 | 48.0  | $4 \text{ CO}_2 + 9 \text{ H}_2 \rightarrow \text{CC}(=\text{O})\text{O} + 5 \text{ H}_2\text{O} + \text{CC}=\text{O}$                                                                                           |

| Label      | $n_M$ | $n_B$ | $E_C$  | $E_H$ | Net reaction                                                                                                                                             |
|------------|-------|-------|--------|-------|----------------------------------------------------------------------------------------------------------------------------------------------------------|
| 90_387_154 | 18    | 1     | -179.5 | 48.0  | $4 \text{ CO}_2 + 9 \text{ H}_2 \rightarrow \text{CC(=O)O} + 5 \text{ H}_2\text{O} + \text{CC=O}$                                                        |
| 90_387_156 | 18    | 1     | -179.5 | 48.0  | $4 \text{ CO}_2 + 9 \text{ H}_2 \rightarrow \text{CC(=O)O} + 5 \text{ H}_2\text{O} + \text{CC=O}$                                                        |
| 90_387_157 | 16    | 0     | -181.7 | 48.0  | $4 \text{ CO}_2 + 10 \text{ H}_2 \rightarrow 6 \text{ H}_2\text{O} + \text{CCC=O} + \text{C=O}$                                                          |
| 90_387_158 | 17    | 0     | -181.7 | 48.0  | $4 \text{ CO}_2 + 10 \text{ H}_2 \rightarrow 6 \text{ H}_2\text{O} + \text{CCC=O} + \text{C=O}$                                                          |
| 90_387_160 | 18    | 0     | -194.1 | 48.0  | $4 \text{ CO}_2 + 10 \text{ H}_2 \rightarrow 6 \text{ H}_2\text{O} + 2 \text{ CC=O}$                                                                     |
| 90_387_161 | 16    | 0     | -194.1 | 48.0  | $4 \text{ CO}_2 + 10 \text{ H}_2 \rightarrow 6 \text{ H}_2\text{O} + 2 \text{ CC=O}$                                                                     |
| 90_387_162 | 17    | 0     | -194.1 | 48.0  | $4 \text{ CO}_2 + 10 \text{ H}_2 \rightarrow 6 \text{ H}_2\text{O} + 2 \text{ CC=O}$                                                                     |
| 90_387_164 | 18    | 1     | -179.5 | 48.0  | $4 \text{ CO}_2 + 9 \text{ H}_2 \rightarrow \text{CC(=O)O} + 5 \text{ H}_2\text{O} + \text{CC=O}$                                                        |
| 90_387_166 | 18    | 1     | -179.5 | 48.0  | $4 \text{ CO}_2 + 9 \text{ H}_2 \rightarrow \text{CC(=O)O} + 5 \text{ H}_2\text{O} + \text{CC=O}$                                                        |
| 90_387_168 | 18    | 1     | -179.5 | 48.0  | $4 \text{ CO}_2 + 9 \text{ H}_2 \rightarrow \text{CC(=O)O} + 5 \text{ H}_2\text{O} + \text{CC=O}$                                                        |
| 90_387_170 | 16    | 0     | -175.7 | 48.0  | $9 \text{ H}_2 + 3 \text{ CO}_2 + \text{OCC(=O)C(=O)O} \rightarrow$<br>$\rightarrow 5 \text{ H}_2\text{O} + \text{OCC(=O)O} + \text{CCC=O} + \text{C=O}$ |
| 90_387_172 | 18    | 0     | -194.1 | 48.0  | $4 \text{ CO}_2 + 10 \text{ H}_2 \rightarrow 6 \text{ H}_2\text{O} + 2 \text{ CC=O}$                                                                     |
| 90_387_173 | 16    | 0     | -194.1 | 48.0  | $4 \text{ CO}_2 + 10 \text{ H}_2 \rightarrow 6 \text{ H}_2\text{O} + 2 \text{ CC=O}$                                                                     |
| 90_387_174 | 17    | 0     | -194.1 | 48.0  | $4 \text{ CO}_2 + 10 \text{ H}_2 \rightarrow 6 \text{ H}_2\text{O} + 2 \text{ CC=O}$                                                                     |
| 90_387_176 | 18    | 1     | -179.5 | 48.0  | $4 \text{ CO}_2 + 9 \text{ H}_2 \rightarrow \text{CC(=O)O} + 5 \text{ H}_2\text{O} + \text{CC=O}$                                                        |
| 90_387_178 | 18    | 1     | -179.5 | 48.0  | $4 \text{ CO}_2 + 9 \text{ H}_2 \rightarrow \text{CC(=O)O} + 5 \text{ H}_2\text{O} + \text{CC=O}$                                                        |
| 90_387_180 | 18    | 1     | -179.5 | 48.0  | $4 \text{ CO}_2 + 9 \text{ H}_2 \rightarrow \text{CC(=O)O} + 5 \text{ H}_2\text{O} + \text{CC=O}$                                                        |

| Label      | $n_M$ | $n_B$ | $E_C$  | $E_H$ | Net reaction                                                                                                                                                                                                     |
|------------|-------|-------|--------|-------|------------------------------------------------------------------------------------------------------------------------------------------------------------------------------------------------------------------|
| 90_387_182 | 18    | 0     | -181.7 | 46.9  | $4 \text{ CO}_2 + 10 \text{ H}_2 \rightarrow 6 \text{ H}_2\text{O} + \text{CCC}=\text{O} + \text{C}=\text{O}$                                                                                                    |
| 90_387_184 | 18    | 0     | -194.1 | 46.9  | $4 \text{ CO}_2 + 10 \text{ H}_2 \rightarrow 6 \text{ H}_2\text{O} + 2 \text{ CC}=\text{O}$                                                                                                                      |
| 90_387_186 | 18    | 0     | -194.1 | 46.9  | $4 \text{ CO}_2 + 10 \text{ H}_2 \rightarrow 6 \text{ H}_2\text{O} + 2 \text{ CC}=\text{O}$                                                                                                                      |
| 90_387_188 | 18    | 1     | -179.5 | 46.9  | $4 \text{ CO}_2 + 9 \text{ H}_2 \rightarrow \text{CC}(=\text{O})\text{O} + 5 \text{ H}_2\text{O} + \text{CC}=\text{O}$                                                                                           |
| 90_387_190 | 18    | 1     | -179.5 | 46.9  | $4 \text{ CO}_2 + 9 \text{ H}_2 \rightarrow \text{CC}(=\text{O})\text{O} + 5 \text{ H}_2\text{O} + \text{CC}=\text{O}$                                                                                           |
| 90_387_192 | 18    | 1     | -179.5 | 46.9  | $4 \text{ CO}_2 + 9 \text{ H}_2 \rightarrow \text{CC}(=\text{O})\text{O} + 5 \text{ H}_2\text{O} + \text{CC}=\text{O}$                                                                                           |
| 90_387_193 | 16    | 0     | -181.7 | 46.9  | $4 \text{ CO}_2 + 10 \text{ H}_2 \rightarrow 6 \text{ H}_2\text{O} + \text{CCC}=\text{O} + \text{C}=\text{O}$                                                                                                    |
| 90_387_194 | 17    | 0     | -181.7 | 46.9  | $4 \text{ CO}_2 + 10 \text{ H}_2 \rightarrow 6 \text{ H}_2\text{O} + \text{CCC}=\text{O} + \text{C}=\text{O}$                                                                                                    |
| 90_387_196 | 18    | 0     | -194.1 | 46.9  | $4 \text{ CO}_2 + 10 \text{ H}_2 \rightarrow 6 \text{ H}_2\text{O} + 2 \text{ CC}=\text{O}$                                                                                                                      |
| 90_387_198 | 18    | 0     | -194.1 | 46.9  | $4 \text{ CO}_2 + 10 \text{ H}_2 \rightarrow 6 \text{ H}_2\text{O} + 2 \text{ CC}=\text{O}$                                                                                                                      |
| 90_387_200 | 18    | 1     | -179.5 | 46.9  | $4 \text{ CO}_2 + 9 \text{ H}_2 \rightarrow \text{CC}(=\text{O})\text{O} + 5 \text{ H}_2\text{O} + \text{CC}=\text{O}$                                                                                           |
| 90_387_202 | 18    | 1     | -179.5 | 46.9  | $4 \text{ CO}_2 + 9 \text{ H}_2 \rightarrow \text{CC}(=\text{O})\text{O} + 5 \text{ H}_2\text{O} + \text{CC}=\text{O}$                                                                                           |
| 90_387_204 | 18    | 1     | -179.5 | 46.9  | $4 \text{ CO}_2 + 9 \text{ H}_2 \rightarrow \text{CC}(=\text{O})\text{O} + 5 \text{ H}_2\text{O} + \text{CC}=\text{O}$                                                                                           |
| 90_387_206 | 16    | 0     | -175.7 | 46.9  | $9 \text{ H}_2 + 3 \text{ CO}_2 + \text{OCC}(=\text{O})\text{C}(=\text{O})\text{O} \rightarrow$<br>$\rightarrow 5 \text{ H}_2\text{O} + \text{OCC}(=\text{O})\text{O} + \text{CCC}=\text{O} + \text{C}=\text{O}$ |
| 90_387_208 | 18    | 0     | -194.1 | 46.9  | $4 \text{ CO}_2 + 10 \text{ H}_2 \rightarrow 6 \text{ H}_2\text{O} + 2 \text{ CC}=\text{O}$                                                                                                                      |
| 90_387_210 | 18    | 0     | -194.1 | 46.9  | $4 \text{ CO}_2 + 10 \text{ H}_2 \rightarrow 6 \text{ H}_2\text{O} + 2 \text{ CC}=\text{O}$                                                                                                                      |
| 90_387_212 | 18    | 1     | -179.5 | 46.9  | $4 \text{ CO}_2 + 9 \text{ H}_2 \rightarrow \text{CC}(=\text{O})\text{O} + 5 \text{ H}_2\text{O} + \text{CC}=\text{O}$                                                                                           |

| Label      | $n_M$ | $n_B$ | $E_C$  | $E_H$ | Net reaction                                                                                                                                        |
|------------|-------|-------|--------|-------|-----------------------------------------------------------------------------------------------------------------------------------------------------|
| 90.387.214 | 18    | 1     | -179.5 | 46.9  | $4 \text{ CO}_2 + 9 \text{ H}_2 \rightarrow \text{CC(=O)O} + 5 \text{ H}_2\text{O} + \text{CC=O}$                                                   |
| 90.387.216 | 18    | 1     | -179.5 | 46.9  | $4 \text{ CO}_2 + 9 \text{ H}_2 \rightarrow \text{CC(=O)O} + 5 \text{ H}_2\text{O} + \text{CC=O}$                                                   |
| 90.387.218 | 18    | 0     | -181.7 | 48.0  | $4 \text{ CO}_2 + 10 \text{ H}_2 \rightarrow 6 \text{ H}_2\text{O} + \text{CCC=O} + \text{C=O}$                                                     |
| 90.387.219 | 16    | 0     | -194.1 | 48.0  | $4 \text{ CO}_2 + 10 \text{ H}_2 \rightarrow 6 \text{ H}_2\text{O} + 2 \text{ CC=O}$                                                                |
| 90.387.220 | 17    | 0     | -194.1 | 48.0  | $4 \text{ CO}_2 + 10 \text{ H}_2 \rightarrow 6 \text{ H}_2\text{O} + 2 \text{ CC=O}$                                                                |
| 90.387.222 | 16    | 0     | -190.3 | 48.0  | $3 \text{ CO}_2 + 9 \text{ H}_2 + \text{CC(C(=O)C(=O)O)O} \rightarrow$<br>$\rightarrow \text{OC(=O)C(O)C} + 5 \text{ H}_2\text{O} + 2 \text{ CC=O}$ |
| 90.387.224 | 18    | 1     | -179.5 | 48.0  | $4 \text{ CO}_2 + 9 \text{ H}_2 \rightarrow \text{CC(=O)O} + 5 \text{ H}_2\text{O} + \text{CC=O}$                                                   |
| 90.387.226 | 18    | 1     | -179.5 | 48.0  | $4 \text{ CO}_2 + 9 \text{ H}_2 \rightarrow \text{CC(=O)O} + 5 \text{ H}_2\text{O} + \text{CC=O}$                                                   |
| 90.387.228 | 18    | 1     | -179.5 | 48.0  | $4 \text{ CO}_2 + 9 \text{ H}_2 \rightarrow \text{CC(=O)O} + 5 \text{ H}_2\text{O} + \text{CC=O}$                                                   |
| 90.387.229 | 16    | 0     | -181.7 | 48.0  | $4 \text{ CO}_2 + 10 \text{ H}_2 \rightarrow 6 \text{ H}_2\text{O} + \text{CCC=O} + \text{C=O}$                                                     |
| 90.387.230 | 17    | 0     | -181.7 | 48.0  | $4 \text{ CO}_2 + 10 \text{ H}_2 \rightarrow 6 \text{ H}_2\text{O} + \text{CCC=O} + \text{C=O}$                                                     |
| 90.387.231 | 16    | 0     | -194.1 | 48.0  | $4 \text{ CO}_2 + 10 \text{ H}_2 \rightarrow 6 \text{ H}_2\text{O} + 2 \text{ CC=O}$                                                                |
| 90.387.232 | 17    | 0     | -194.1 | 48.0  | $4 \text{ CO}_2 + 10 \text{ H}_2 \rightarrow 6 \text{ H}_2\text{O} + 2 \text{ CC=O}$                                                                |
| 90.387.234 | 16    | 0     | -190.3 | 48.0  | $3 \text{ CO}_2 + 9 \text{ H}_2 + \text{CC(C(=O)C(=O)O)O} \rightarrow$<br>$\rightarrow \text{OC(=O)C(O)C} + 5 \text{ H}_2\text{O} + 2 \text{ CC=O}$ |
| 90.387.236 | 18    | 1     | -179.5 | 48.0  | $4 \text{ CO}_2 + 9 \text{ H}_2 \rightarrow \text{CC(=O)O} + 5 \text{ H}_2\text{O} + \text{CC=O}$                                                   |
| 90.387.238 | 18    | 1     | -179.5 | 48.0  | $4 \text{ CO}_2 + 9 \text{ H}_2 \rightarrow \text{CC(=O)O} + 5 \text{ H}_2\text{O} + \text{CC=O}$                                                   |

| Label      | $n_M$ | $n_B$ | $E_C$  | $E_H$ | Net reaction                                                                                                                                             |
|------------|-------|-------|--------|-------|----------------------------------------------------------------------------------------------------------------------------------------------------------|
| 90.387.240 | 18    | 1     | -179.5 | 48.0  | $4 \text{ CO}_2 + 9 \text{ H}_2 \rightarrow \text{CC(=O)O} + 5 \text{ H}_2\text{O} + \text{CC=O}$                                                        |
| 90.387.242 | 16    | 0     | -175.7 | 48.0  | $9 \text{ H}_2 + 3 \text{ CO}_2 + \text{OCC(=O)C(=O)O} \rightarrow$<br>$\rightarrow 5 \text{ H}_2\text{O} + \text{OCC(=O)O} + \text{CCC=O} + \text{C=O}$ |
| 90.387.243 | 16    | 0     | -194.1 | 48.0  | $4 \text{ CO}_2 + 10 \text{ H}_2 \rightarrow 6 \text{ H}_2\text{O} + 2 \text{ CC=O}$                                                                     |
| 90.387.244 | 17    | 0     | -194.1 | 48.0  | $4 \text{ CO}_2 + 10 \text{ H}_2 \rightarrow 6 \text{ H}_2\text{O} + 2 \text{ CC=O}$                                                                     |
| 90.387.246 | 16    | 0     | -190.3 | 48.0  | $3 \text{ CO}_2 + 9 \text{ H}_2 + \text{CC(C(=O)C(=O)O)O} \rightarrow$<br>$\rightarrow \text{OC(=O)C(O)C} + 5 \text{ H}_2\text{O} + 2 \text{ CC=O}$      |
| 90.387.248 | 18    | 1     | -179.5 | 48.0  | $4 \text{ CO}_2 + 9 \text{ H}_2 \rightarrow \text{CC(=O)O} + 5 \text{ H}_2\text{O} + \text{CC=O}$                                                        |
| 90.387.250 | 18    | 1     | -179.5 | 48.0  | $4 \text{ CO}_2 + 9 \text{ H}_2 \rightarrow \text{CC(=O)O} + 5 \text{ H}_2\text{O} + \text{CC=O}$                                                        |
| 90.387.252 | 18    | 1     | -179.5 | 48.0  | $4 \text{ CO}_2 + 9 \text{ H}_2 \rightarrow \text{CC(=O)O} + 5 \text{ H}_2\text{O} + \text{CC=O}$                                                        |
| 90.387.254 | 18    | 0     | -181.7 | 47.7  | $4 \text{ CO}_2 + 10 \text{ H}_2 \rightarrow 6 \text{ H}_2\text{O} + \text{CCC=O} + \text{C=O}$                                                          |
| 90.387.256 | 18    | 0     | -194.1 | 47.7  | $4 \text{ CO}_2 + 10 \text{ H}_2 \rightarrow 6 \text{ H}_2\text{O} + 2 \text{ CC=O}$                                                                     |
| 90.387.258 | 18    | 0     | -194.1 | 47.7  | $4 \text{ CO}_2 + 10 \text{ H}_2 \rightarrow 6 \text{ H}_2\text{O} + 2 \text{ CC=O}$                                                                     |
| 90.387.260 | 18    | 1     | -179.5 | 47.7  | $4 \text{ CO}_2 + 9 \text{ H}_2 \rightarrow \text{CC(=O)O} + 5 \text{ H}_2\text{O} + \text{CC=O}$                                                        |
| 90.387.262 | 18    | 1     | -179.5 | 47.7  | $4 \text{ CO}_2 + 9 \text{ H}_2 \rightarrow \text{CC(=O)O} + 5 \text{ H}_2\text{O} + \text{CC=O}$                                                        |
| 90.387.264 | 18    | 1     | -179.5 | 47.7  | $4 \text{ CO}_2 + 9 \text{ H}_2 \rightarrow \text{CC(=O)O} + 5 \text{ H}_2\text{O} + \text{CC=O}$                                                        |
| 90.387.265 | 16    | 0     | -181.7 | 47.7  | $4 \text{ CO}_2 + 10 \text{ H}_2 \rightarrow 6 \text{ H}_2\text{O} + \text{CCC=O} + \text{C=O}$                                                          |
| 90.387.266 | 17    | 0     | -181.7 | 47.7  | $4 \text{ CO}_2 + 10 \text{ H}_2 \rightarrow 6 \text{ H}_2\text{O} + \text{CCC=O} + \text{C=O}$                                                          |

| Label      | $n_M$ | $n_B$ | $E_C$  | $E_H$ | Net reaction                                                                                                                                                                                                     |
|------------|-------|-------|--------|-------|------------------------------------------------------------------------------------------------------------------------------------------------------------------------------------------------------------------|
| 90_387_268 | 18    | 0     | -194.1 | 47.7  | $4 \text{ CO}_2 + 10 \text{ H}_2 \rightarrow 6 \text{ H}_2\text{O} + 2 \text{ CC}=\text{O}$                                                                                                                      |
| 90_387_270 | 18    | 0     | -194.1 | 47.7  | $4 \text{ CO}_2 + 10 \text{ H}_2 \rightarrow 6 \text{ H}_2\text{O} + 2 \text{ CC}=\text{O}$                                                                                                                      |
| 90_387_272 | 18    | 1     | -179.5 | 47.7  | $4 \text{ CO}_2 + 9 \text{ H}_2 \rightarrow \text{CC}(=\text{O})\text{O} + 5 \text{ H}_2\text{O} + \text{CC}=\text{O}$                                                                                           |
| 90_387_274 | 18    | 1     | -179.5 | 47.7  | $4 \text{ CO}_2 + 9 \text{ H}_2 \rightarrow \text{CC}(=\text{O})\text{O} + 5 \text{ H}_2\text{O} + \text{CC}=\text{O}$                                                                                           |
| 90_387_276 | 18    | 1     | -179.5 | 47.7  | $4 \text{ CO}_2 + 9 \text{ H}_2 \rightarrow \text{CC}(=\text{O})\text{O} + 5 \text{ H}_2\text{O} + \text{CC}=\text{O}$                                                                                           |
| 90_387_278 | 16    | 0     | -175.7 | 47.7  | $9 \text{ H}_2 + 3 \text{ CO}_2 + \text{OCC}(=\text{O})\text{C}(=\text{O})\text{O} \rightarrow$<br>$\rightarrow 5 \text{ H}_2\text{O} + \text{OCC}(=\text{O})\text{O} + \text{CCC}=\text{O} + \text{C}=\text{O}$ |
| 90_387_280 | 18    | 0     | -194.1 | 47.7  | $4 \text{ CO}_2 + 10 \text{ H}_2 \rightarrow 6 \text{ H}_2\text{O} + 2 \text{ CC}=\text{O}$                                                                                                                      |
| 90_387_282 | 18    | 0     | -194.1 | 47.7  | $4 \text{ CO}_2 + 10 \text{ H}_2 \rightarrow 6 \text{ H}_2\text{O} + 2 \text{ CC}=\text{O}$                                                                                                                      |
| 90_387_284 | 18    | 1     | -179.5 | 47.7  | $4 \text{ CO}_2 + 9 \text{ H}_2 \rightarrow \text{CC}(=\text{O})\text{O} + 5 \text{ H}_2\text{O} + \text{CC}=\text{O}$                                                                                           |
| 90_387_286 | 18    | 1     | -179.5 | 47.7  | $4 \text{ CO}_2 + 9 \text{ H}_2 \rightarrow \text{CC}(=\text{O})\text{O} + 5 \text{ H}_2\text{O} + \text{CC}=\text{O}$                                                                                           |
| 90_387_288 | 18    | 1     | -179.5 | 47.7  | $4 \text{ CO}_2 + 9 \text{ H}_2 \rightarrow \text{CC}(=\text{O})\text{O} + 5 \text{ H}_2\text{O} + \text{CC}=\text{O}$                                                                                           |
| 90_387_290 | 18    | 0     | -181.7 | 48.0  | $4 \text{ CO}_2 + 10 \text{ H}_2 \rightarrow 6 \text{ H}_2\text{O} + \text{CCC}=\text{O} + \text{C}=\text{O}$                                                                                                    |
| 90_387_292 | 18    | 0     | -194.1 | 48.0  | $4 \text{ CO}_2 + 10 \text{ H}_2 \rightarrow 6 \text{ H}_2\text{O} + 2 \text{ CC}=\text{O}$                                                                                                                      |
| 90_387_293 | 16    | 0     | -194.1 | 48.0  | $4 \text{ CO}_2 + 10 \text{ H}_2 \rightarrow 6 \text{ H}_2\text{O} + 2 \text{ CC}=\text{O}$                                                                                                                      |
| 90_387_294 | 17    | 0     | -194.1 | 48.0  | $4 \text{ CO}_2 + 10 \text{ H}_2 \rightarrow 6 \text{ H}_2\text{O} + 2 \text{ CC}=\text{O}$                                                                                                                      |
| 90_387_296 | 18    | 1     | -179.5 | 48.0  | $4 \text{ CO}_2 + 9 \text{ H}_2 \rightarrow \text{CC}(=\text{O})\text{O} + 5 \text{ H}_2\text{O} + \text{CC}=\text{O}$                                                                                           |
| 90_387_298 | 18    | 1     | -179.5 | 48.0  | $4 \text{ CO}_2 + 9 \text{ H}_2 \rightarrow \text{CC}(=\text{O})\text{O} + 5 \text{ H}_2\text{O} + \text{CC}=\text{O}$                                                                                           |



| Label      | $n_M$ | $n_B$ | $E_C$  | $E_H$ | Net reaction                                                                                                                                             |
|------------|-------|-------|--------|-------|----------------------------------------------------------------------------------------------------------------------------------------------------------|
| 90_387_300 | 18    | 1     | -179.5 | 48.0  | $4 \text{ CO}_2 + 9 \text{ H}_2 \rightarrow \text{CC(=O)O} + 5 \text{ H}_2\text{O} + \text{CC=O}$                                                        |
| 90_387_301 | 16    | 0     | -181.7 | 48.0  | $4 \text{ CO}_2 + 10 \text{ H}_2 \rightarrow 6 \text{ H}_2\text{O} + \text{CCC=O} + \text{C=O}$                                                          |
| 90_387_302 | 17    | 0     | -181.7 | 48.0  | $4 \text{ CO}_2 + 10 \text{ H}_2 \rightarrow 6 \text{ H}_2\text{O} + \text{CCC=O} + \text{C=O}$                                                          |
| 90_387_304 | 18    | 0     | -194.1 | 48.0  | $4 \text{ CO}_2 + 10 \text{ H}_2 \rightarrow 6 \text{ H}_2\text{O} + 2 \text{ CC=O}$                                                                     |
| 90_387_305 | 16    | 0     | -194.1 | 48.0  | $4 \text{ CO}_2 + 10 \text{ H}_2 \rightarrow 6 \text{ H}_2\text{O} + 2 \text{ CC=O}$                                                                     |
| 90_387_306 | 17    | 0     | -194.1 | 48.0  | $4 \text{ CO}_2 + 10 \text{ H}_2 \rightarrow 6 \text{ H}_2\text{O} + 2 \text{ CC=O}$                                                                     |
| 90_387_308 | 18    | 1     | -179.5 | 48.0  | $4 \text{ CO}_2 + 9 \text{ H}_2 \rightarrow \text{CC(=O)O} + 5 \text{ H}_2\text{O} + \text{CC=O}$                                                        |
| 90_387_310 | 18    | 1     | -179.5 | 48.0  | $4 \text{ CO}_2 + 9 \text{ H}_2 \rightarrow \text{CC(=O)O} + 5 \text{ H}_2\text{O} + \text{CC=O}$                                                        |
| 90_387_312 | 18    | 1     | -179.5 | 48.0  | $4 \text{ CO}_2 + 9 \text{ H}_2 \rightarrow \text{CC(=O)O} + 5 \text{ H}_2\text{O} + \text{CC=O}$                                                        |
| 90_387_314 | 16    | 0     | -175.7 | 48.0  | $9 \text{ H}_2 + 3 \text{ CO}_2 + \text{OCC(=O)C(=O)O} \rightarrow$<br>$\rightarrow 5 \text{ H}_2\text{O} + \text{OCC(=O)O} + \text{CCC=O} + \text{C=O}$ |
| 90_387_316 | 18    | 0     | -194.1 | 48.0  | $4 \text{ CO}_2 + 10 \text{ H}_2 \rightarrow 6 \text{ H}_2\text{O} + 2 \text{ CC=O}$                                                                     |
| 90_387_317 | 16    | 0     | -194.1 | 48.0  | $4 \text{ CO}_2 + 10 \text{ H}_2 \rightarrow 6 \text{ H}_2\text{O} + 2 \text{ CC=O}$                                                                     |
| 90_387_318 | 17    | 0     | -194.1 | 48.0  | $4 \text{ CO}_2 + 10 \text{ H}_2 \rightarrow 6 \text{ H}_2\text{O} + 2 \text{ CC=O}$                                                                     |
| 90_387_320 | 18    | 1     | -179.5 | 48.0  | $4 \text{ CO}_2 + 9 \text{ H}_2 \rightarrow \text{CC(=O)O} + 5 \text{ H}_2\text{O} + \text{CC=O}$                                                        |
| 90_387_322 | 18    | 1     | -179.5 | 48.0  | $4 \text{ CO}_2 + 9 \text{ H}_2 \rightarrow \text{CC(=O)O} + 5 \text{ H}_2\text{O} + \text{CC=O}$                                                        |
| 90_387_324 | 18    | 1     | -179.5 | 48.0  | $4 \text{ CO}_2 + 9 \text{ H}_2 \rightarrow \text{CC(=O)O} + 5 \text{ H}_2\text{O} + \text{CC=O}$                                                        |
| 90_387_326 | 18    | 0     | -181.7 | 47.7  | $4 \text{ CO}_2 + 10 \text{ H}_2 \rightarrow 6 \text{ H}_2\text{O} + \text{CCC=O} + \text{C=O}$                                                          |

| Label      | $n_M$ | $n_B$ | $E_C$  | $E_H$ | Net reaction                                                                                                                                                                                                     |
|------------|-------|-------|--------|-------|------------------------------------------------------------------------------------------------------------------------------------------------------------------------------------------------------------------|
| 90_387_328 | 18    | 0     | -194.1 | 47.7  | $4 \text{ CO}_2 + 10 \text{ H}_2 \rightarrow 6 \text{ H}_2\text{O} + 2 \text{ CC}=\text{O}$                                                                                                                      |
| 90_387_330 | 18    | 0     | -194.1 | 47.7  | $4 \text{ CO}_2 + 10 \text{ H}_2 \rightarrow 6 \text{ H}_2\text{O} + 2 \text{ CC}=\text{O}$                                                                                                                      |
| 90_387_332 | 18    | 1     | -179.5 | 47.7  | $4 \text{ CO}_2 + 9 \text{ H}_2 \rightarrow \text{CC}(=\text{O})\text{O} + 5 \text{ H}_2\text{O} + \text{CC}=\text{O}$                                                                                           |
| 90_387_334 | 18    | 1     | -179.5 | 47.7  | $4 \text{ CO}_2 + 9 \text{ H}_2 \rightarrow \text{CC}(=\text{O})\text{O} + 5 \text{ H}_2\text{O} + \text{CC}=\text{O}$                                                                                           |
| 90_387_336 | 18    | 1     | -179.5 | 47.7  | $4 \text{ CO}_2 + 9 \text{ H}_2 \rightarrow \text{CC}(=\text{O})\text{O} + 5 \text{ H}_2\text{O} + \text{CC}=\text{O}$                                                                                           |
| 90_387_337 | 16    | 0     | -181.7 | 47.7  | $4 \text{ CO}_2 + 10 \text{ H}_2 \rightarrow 6 \text{ H}_2\text{O} + \text{CCC}=\text{O} + \text{C}=\text{O}$                                                                                                    |
| 90_387_338 | 17    | 0     | -181.7 | 47.7  | $4 \text{ CO}_2 + 10 \text{ H}_2 \rightarrow 6 \text{ H}_2\text{O} + \text{CCC}=\text{O} + \text{C}=\text{O}$                                                                                                    |
| 90_387_340 | 18    | 0     | -194.1 | 47.7  | $4 \text{ CO}_2 + 10 \text{ H}_2 \rightarrow 6 \text{ H}_2\text{O} + 2 \text{ CC}=\text{O}$                                                                                                                      |
| 90_387_342 | 18    | 0     | -194.1 | 47.7  | $4 \text{ CO}_2 + 10 \text{ H}_2 \rightarrow 6 \text{ H}_2\text{O} + 2 \text{ CC}=\text{O}$                                                                                                                      |
| 90_387_344 | 18    | 1     | -179.5 | 47.7  | $4 \text{ CO}_2 + 9 \text{ H}_2 \rightarrow \text{CC}(=\text{O})\text{O} + 5 \text{ H}_2\text{O} + \text{CC}=\text{O}$                                                                                           |
| 90_387_346 | 18    | 1     | -179.5 | 47.7  | $4 \text{ CO}_2 + 9 \text{ H}_2 \rightarrow \text{CC}(=\text{O})\text{O} + 5 \text{ H}_2\text{O} + \text{CC}=\text{O}$                                                                                           |
| 90_387_348 | 18    | 1     | -179.5 | 47.7  | $4 \text{ CO}_2 + 9 \text{ H}_2 \rightarrow \text{CC}(=\text{O})\text{O} + 5 \text{ H}_2\text{O} + \text{CC}=\text{O}$                                                                                           |
| 90_387_350 | 16    | 0     | -175.7 | 47.7  | $9 \text{ H}_2 + 3 \text{ CO}_2 + \text{OCC}(=\text{O})\text{C}(=\text{O})\text{O} \rightarrow$<br>$\rightarrow 5 \text{ H}_2\text{O} + \text{OCC}(=\text{O})\text{O} + \text{CCC}=\text{O} + \text{C}=\text{O}$ |
| 90_387_352 | 18    | 0     | -194.1 | 47.7  | $4 \text{ CO}_2 + 10 \text{ H}_2 \rightarrow 6 \text{ H}_2\text{O} + 2 \text{ CC}=\text{O}$                                                                                                                      |
| 90_387_354 | 18    | 0     | -194.1 | 47.7  | $4 \text{ CO}_2 + 10 \text{ H}_2 \rightarrow 6 \text{ H}_2\text{O} + 2 \text{ CC}=\text{O}$                                                                                                                      |
| 90_387_356 | 18    | 1     | -179.5 | 47.7  | $4 \text{ CO}_2 + 9 \text{ H}_2 \rightarrow \text{CC}(=\text{O})\text{O} + 5 \text{ H}_2\text{O} + \text{CC}=\text{O}$                                                                                           |
| 90_387_358 | 18    | 1     | -179.5 | 47.7  | $4 \text{ CO}_2 + 9 \text{ H}_2 \rightarrow \text{CC}(=\text{O})\text{O} + 5 \text{ H}_2\text{O} + \text{CC}=\text{O}$                                                                                           |

| Label      | $n_M$ | $n_B$ | $E_C$  | $E_H$ | Net reaction                                                                                                                                                                                                     |
|------------|-------|-------|--------|-------|------------------------------------------------------------------------------------------------------------------------------------------------------------------------------------------------------------------|
| 90_387_360 | 18    | 1     | -179.5 | 47.7  | $4 \text{ CO}_2 + 9 \text{ H}_2 \rightarrow \text{CC}(=\text{O})\text{O} + 5 \text{ H}_2\text{O} + \text{CC}=\text{O}$                                                                                           |
| 90_387_362 | 18    | 0     | -181.7 | 48.4  | $4 \text{ CO}_2 + 10 \text{ H}_2 \rightarrow 6 \text{ H}_2\text{O} + \text{CCC}=\text{O} + \text{C}=\text{O}$                                                                                                    |
| 90_387_364 | 18    | 0     | -194.1 | 48.4  | $4 \text{ CO}_2 + 10 \text{ H}_2 \rightarrow 6 \text{ H}_2\text{O} + 2 \text{ CC}=\text{O}$                                                                                                                      |
| 90_387_365 | 16    | 0     | -194.1 | 48.4  | $4 \text{ CO}_2 + 10 \text{ H}_2 \rightarrow 6 \text{ H}_2\text{O} + 2 \text{ CC}=\text{O}$                                                                                                                      |
| 90_387_366 | 17    | 0     | -194.1 | 48.4  | $4 \text{ CO}_2 + 10 \text{ H}_2 \rightarrow 6 \text{ H}_2\text{O} + 2 \text{ CC}=\text{O}$                                                                                                                      |
| 90_387_368 | 18    | 1     | -179.5 | 48.4  | $4 \text{ CO}_2 + 9 \text{ H}_2 \rightarrow \text{CC}(=\text{O})\text{O} + 5 \text{ H}_2\text{O} + \text{CC}=\text{O}$                                                                                           |
| 90_387_370 | 18    | 1     | -179.5 | 48.4  | $4 \text{ CO}_2 + 9 \text{ H}_2 \rightarrow \text{CC}(=\text{O})\text{O} + 5 \text{ H}_2\text{O} + \text{CC}=\text{O}$                                                                                           |
| 90_387_372 | 18    | 1     | -179.5 | 48.4  | $4 \text{ CO}_2 + 9 \text{ H}_2 \rightarrow \text{CC}(=\text{O})\text{O} + 5 \text{ H}_2\text{O} + \text{CC}=\text{O}$                                                                                           |
| 90_387_373 | 16    | 0     | -181.7 | 48.4  | $4 \text{ CO}_2 + 10 \text{ H}_2 \rightarrow 6 \text{ H}_2\text{O} + \text{CCC}=\text{O} + \text{C}=\text{O}$                                                                                                    |
| 90_387_374 | 17    | 0     | -181.7 | 48.4  | $4 \text{ CO}_2 + 10 \text{ H}_2 \rightarrow 6 \text{ H}_2\text{O} + \text{CCC}=\text{O} + \text{C}=\text{O}$                                                                                                    |
| 90_387_376 | 18    | 0     | -194.1 | 48.4  | $4 \text{ CO}_2 + 10 \text{ H}_2 \rightarrow 6 \text{ H}_2\text{O} + 2 \text{ CC}=\text{O}$                                                                                                                      |
| 90_387_377 | 16    | 0     | -194.1 | 48.4  | $4 \text{ CO}_2 + 10 \text{ H}_2 \rightarrow 6 \text{ H}_2\text{O} + 2 \text{ CC}=\text{O}$                                                                                                                      |
| 90_387_378 | 17    | 0     | -194.1 | 48.4  | $4 \text{ CO}_2 + 10 \text{ H}_2 \rightarrow 6 \text{ H}_2\text{O} + 2 \text{ CC}=\text{O}$                                                                                                                      |
| 90_387_380 | 18    | 1     | -179.5 | 48.4  | $4 \text{ CO}_2 + 9 \text{ H}_2 \rightarrow \text{CC}(=\text{O})\text{O} + 5 \text{ H}_2\text{O} + \text{CC}=\text{O}$                                                                                           |
| 90_387_382 | 18    | 1     | -179.5 | 48.4  | $4 \text{ CO}_2 + 9 \text{ H}_2 \rightarrow \text{CC}(=\text{O})\text{O} + 5 \text{ H}_2\text{O} + \text{CC}=\text{O}$                                                                                           |
| 90_387_384 | 18    | 1     | -179.5 | 48.4  | $4 \text{ CO}_2 + 9 \text{ H}_2 \rightarrow \text{CC}(=\text{O})\text{O} + 5 \text{ H}_2\text{O} + \text{CC}=\text{O}$                                                                                           |
| 90_387_386 | 16    | 0     | -175.7 | 48.4  | $9 \text{ H}_2 + 3 \text{ CO}_2 + \text{OCC}(=\text{O})\text{C}(=\text{O})\text{O} \rightarrow$<br>$\rightarrow 5 \text{ H}_2\text{O} + \text{OCC}(=\text{O})\text{O} + \text{CCC}=\text{O} + \text{C}=\text{O}$ |

| Label      | $n_M$ | $n_B$ | $E_C$  | $E_H$ | Net reaction                                                                                                           |
|------------|-------|-------|--------|-------|------------------------------------------------------------------------------------------------------------------------|
| 90_387_388 | 18    | 0     | -194.1 | 48.4  | $4 \text{ CO}_2 + 10 \text{ H}_2 \rightarrow 6 \text{ H}_2\text{O} + 2 \text{ CC}=\text{O}$                            |
| 90_387_389 | 16    | 0     | -194.1 | 48.4  | $4 \text{ CO}_2 + 10 \text{ H}_2 \rightarrow 6 \text{ H}_2\text{O} + 2 \text{ CC}=\text{O}$                            |
| 90_387_390 | 17    | 0     | -194.1 | 48.4  | $4 \text{ CO}_2 + 10 \text{ H}_2 \rightarrow 6 \text{ H}_2\text{O} + 2 \text{ CC}=\text{O}$                            |
| 90_387_392 | 18    | 1     | -179.5 | 48.4  | $4 \text{ CO}_2 + 9 \text{ H}_2 \rightarrow \text{CC}(=\text{O})\text{O} + 5 \text{ H}_2\text{O} + \text{CC}=\text{O}$ |
| 90_387_394 | 18    | 1     | -179.5 | 48.4  | $4 \text{ CO}_2 + 9 \text{ H}_2 \rightarrow \text{CC}(=\text{O})\text{O} + 5 \text{ H}_2\text{O} + \text{CC}=\text{O}$ |
| 90_387_396 | 18    | 1     | -179.5 | 48.4  | $4 \text{ CO}_2 + 9 \text{ H}_2 \rightarrow \text{CC}(=\text{O})\text{O} + 5 \text{ H}_2\text{O} + \text{CC}=\text{O}$ |
| 90_387_398 | 18    | 0     | -181.7 | 48.4  | $4 \text{ CO}_2 + 10 \text{ H}_2 \rightarrow 6 \text{ H}_2\text{O} + \text{CCC}=\text{O} + \text{C}=\text{O}$          |
| 90_387_400 | 18    | 0     | -194.1 | 48.4  | $4 \text{ CO}_2 + 10 \text{ H}_2 \rightarrow 6 \text{ H}_2\text{O} + 2 \text{ CC}=\text{O}$                            |
| 90_387_402 | 18    | 0     | -194.1 | 48.4  | $4 \text{ CO}_2 + 10 \text{ H}_2 \rightarrow 6 \text{ H}_2\text{O} + 2 \text{ CC}=\text{O}$                            |
| 90_387_404 | 18    | 1     | -179.5 | 48.4  | $4 \text{ CO}_2 + 9 \text{ H}_2 \rightarrow \text{CC}(=\text{O})\text{O} + 5 \text{ H}_2\text{O} + \text{CC}=\text{O}$ |
| 90_387_406 | 18    | 1     | -179.5 | 48.4  | $4 \text{ CO}_2 + 9 \text{ H}_2 \rightarrow \text{CC}(=\text{O})\text{O} + 5 \text{ H}_2\text{O} + \text{CC}=\text{O}$ |
| 90_387_408 | 18    | 1     | -179.5 | 48.4  | $4 \text{ CO}_2 + 9 \text{ H}_2 \rightarrow \text{CC}(=\text{O})\text{O} + 5 \text{ H}_2\text{O} + \text{CC}=\text{O}$ |
| 90_387_409 | 16    | 0     | -181.7 | 48.4  | $4 \text{ CO}_2 + 10 \text{ H}_2 \rightarrow 6 \text{ H}_2\text{O} + \text{CCC}=\text{O} + \text{C}=\text{O}$          |
| 90_387_410 | 17    | 0     | -181.7 | 48.4  | $4 \text{ CO}_2 + 10 \text{ H}_2 \rightarrow 6 \text{ H}_2\text{O} + \text{CCC}=\text{O} + \text{C}=\text{O}$          |
| 90_387_412 | 18    | 0     | -194.1 | 48.4  | $4 \text{ CO}_2 + 10 \text{ H}_2 \rightarrow 6 \text{ H}_2\text{O} + 2 \text{ CC}=\text{O}$                            |
| 90_387_414 | 18    | 0     | -194.1 | 48.4  | $4 \text{ CO}_2 + 10 \text{ H}_2 \rightarrow 6 \text{ H}_2\text{O} + 2 \text{ CC}=\text{O}$                            |
| 90_387_416 | 18    | 1     | -179.5 | 48.4  | $4 \text{ CO}_2 + 9 \text{ H}_2 \rightarrow \text{CC}(=\text{O})\text{O} + 5 \text{ H}_2\text{O} + \text{CC}=\text{O}$ |
| 90_387_418 | 18    | 1     | -179.5 | 48.4  | $4 \text{ CO}_2 + 9 \text{ H}_2 \rightarrow \text{CC}(=\text{O})\text{O} + 5 \text{ H}_2\text{O} + \text{CC}=\text{O}$ |

| Label      | $n_M$ | $n_B$ | $E_C$  | $E_H$ | Net reaction                                                                                                                                             |
|------------|-------|-------|--------|-------|----------------------------------------------------------------------------------------------------------------------------------------------------------|
| 90_387_420 | 18    | 1     | -179.5 | 48.4  | $4 \text{ CO}_2 + 9 \text{ H}_2 \rightarrow \text{CC(=O)O} + 5 \text{ H}_2\text{O} + \text{CC=O}$                                                        |
| 90_387_422 | 16    | 0     | -175.7 | 48.4  | $9 \text{ H}_2 + 3 \text{ CO}_2 + \text{OCC(=O)C(=O)O} \rightarrow$<br>$\rightarrow 5 \text{ H}_2\text{O} + \text{OCC(=O)O} + \text{CCC=O} + \text{C=O}$ |
| 90_387_424 | 18    | 0     | -194.1 | 48.4  | $4 \text{ CO}_2 + 10 \text{ H}_2 \rightarrow 6 \text{ H}_2\text{O} + 2 \text{ CC=O}$                                                                     |
| 90_387_426 | 18    | 0     | -194.1 | 48.4  | $4 \text{ CO}_2 + 10 \text{ H}_2 \rightarrow 6 \text{ H}_2\text{O} + 2 \text{ CC=O}$                                                                     |
| 90_387_428 | 18    | 1     | -179.5 | 48.4  | $4 \text{ CO}_2 + 9 \text{ H}_2 \rightarrow \text{CC(=O)O} + 5 \text{ H}_2\text{O} + \text{CC=O}$                                                        |
| 90_387_430 | 18    | 1     | -179.5 | 48.4  | $4 \text{ CO}_2 + 9 \text{ H}_2 \rightarrow \text{CC(=O)O} + 5 \text{ H}_2\text{O} + \text{CC=O}$                                                        |
| 90_387_432 | 18    | 1     | -179.5 | 48.4  | $4 \text{ CO}_2 + 9 \text{ H}_2 \rightarrow \text{CC(=O)O} + 5 \text{ H}_2\text{O} + \text{CC=O}$                                                        |
| 90_400_1   | 19    | 2     | -208.9 | 40.6  | $6 \text{ CO}_2 + 12 \text{ H}_2 \rightarrow \text{CC=O} + \text{CC(C(=O)C(=O)O)O} + 7 \text{ H}_2\text{O}$                                              |
| 90_400_2   | 18    | 2     | -205.1 | 40.6  | $5 \text{ CO}_2 + 11 \text{ H}_2 \rightarrow \text{CC=O} + \text{OC(=O)C(O)C} + 6 \text{ H}_2\text{O}$                                                   |
| 90_400_3   | 20    | 3     | -193.3 | 40.6  | $6 \text{ CO}_2 + 11 \text{ H}_2 \rightarrow \text{CC(=O)O} + \text{CC=O} + \text{O=CC(=O)O} + 6 \text{ H}_2\text{O}$                                    |
| 90_400_4   | 20    | 3     | -193.3 | 43.7  | $6 \text{ CO}_2 + 11 \text{ H}_2 \rightarrow \text{CC(=O)O} + \text{CC=O} + \text{O=CC(=O)O} + 6 \text{ H}_2\text{O}$                                    |
| 90_400_5   | 20    | 3     | -193.3 | 43.7  | $6 \text{ CO}_2 + 11 \text{ H}_2 \rightarrow \text{CC(=O)O} + \text{CC=O} + \text{O=CC(=O)O} + 6 \text{ H}_2\text{O}$                                    |
| 90_400_6   | 19    | 2     | -208.9 | 40.6  | $6 \text{ CO}_2 + 12 \text{ H}_2 \rightarrow \text{CC=O} + \text{CC(C(=O)C(=O)O)O} + 7 \text{ H}_2\text{O}$                                              |
| 90_400_7   | 18    | 2     | -205.1 | 40.6  | $5 \text{ CO}_2 + 11 \text{ H}_2 \rightarrow \text{CC=O} + \text{OC(=O)C(O)C} + 6 \text{ H}_2\text{O}$                                                   |
| 90_400_8   | 20    | 3     | -193.3 | 40.6  | $6 \text{ CO}_2 + 11 \text{ H}_2 \rightarrow \text{CC(=O)O} + \text{CC=O} + \text{O=CC(=O)O} + 6 \text{ H}_2\text{O}$                                    |
| 90_400_9   | 20    | 3     | -193.3 | 43.7  | $6 \text{ CO}_2 + 11 \text{ H}_2 \rightarrow \text{CC(=O)O} + \text{CC=O} + \text{O=CC(=O)O} + 6 \text{ H}_2\text{O}$                                    |
| 90_400_10  | 20    | 3     | -193.3 | 43.7  | $6 \text{ CO}_2 + 11 \text{ H}_2 \rightarrow \text{CC(=O)O} + \text{CC=O} + \text{O=CC(=O)O} + 6 \text{ H}_2\text{O}$                                    |

| Label     | $n_M$ | $n_B$ | $E_C$  | $E_H$ | Net reaction                                                                                                                                                    |
|-----------|-------|-------|--------|-------|-----------------------------------------------------------------------------------------------------------------------------------------------------------------|
| 90_400_11 | 19    | 2     | -208.9 | 40.6  | $6 \text{ CO}_2 + 12 \text{ H}_2 \rightarrow \text{CC}=\text{O} + \text{CC}(\text{C}(\text{=O})\text{C}(\text{=O})\text{O})\text{O} + 7 \text{ H}_2\text{O}$    |
| 90_400_12 | 18    | 2     | -205.1 | 40.6  | $5 \text{ CO}_2 + 11 \text{ H}_2 \rightarrow \text{CC}=\text{O} + \text{OC}(\text{=O})\text{C}(\text{O})\text{C} + 6 \text{ H}_2\text{O}$                       |
| 90_400_13 | 20    | 3     | -193.3 | 40.6  | $6 \text{ CO}_2 + 11 \text{ H}_2 \rightarrow \text{CC}(\text{=O})\text{O} + \text{CC}=\text{O} + \text{O}=\text{CC}(\text{=O})\text{O} + 6 \text{ H}_2\text{O}$ |
| 90_400_14 | 20    | 3     | -193.3 | 43.7  | $6 \text{ CO}_2 + 11 \text{ H}_2 \rightarrow \text{CC}(\text{=O})\text{O} + \text{CC}=\text{O} + \text{O}=\text{CC}(\text{=O})\text{O} + 6 \text{ H}_2\text{O}$ |
| 90_400_15 | 20    | 3     | -193.3 | 43.7  | $6 \text{ CO}_2 + 11 \text{ H}_2 \rightarrow \text{CC}(\text{=O})\text{O} + \text{CC}=\text{O} + \text{O}=\text{CC}(\text{=O})\text{O} + 6 \text{ H}_2\text{O}$ |
| 90_402_1  | 11    | 0     | -143.2 | 40.3  | $3 \text{ CO}_2 + 7 \text{ H}_2 \rightarrow 4 \text{ H}_2\text{O} + \text{CCC}(\text{=O})\text{O}$                                                              |
| 90_402_2  | 11    | 0     | -143.2 | 40.3  | $3 \text{ CO}_2 + 7 \text{ H}_2 \rightarrow 4 \text{ H}_2\text{O} + \text{CCC}(\text{=O})\text{O}$                                                              |
| 90_402_3  | 11    | 0     | -143.2 | 40.3  | $7 \text{ H}_2 + 3 \text{ CO}_2 \rightarrow 4 \text{ H}_2\text{O} + \text{CCC}(\text{=O})\text{O}$                                                              |
| 90_402_4  | 11    | 0     | -143.2 | 37.7  | $3 \text{ CO}_2 + 7 \text{ H}_2 \rightarrow 4 \text{ H}_2\text{O} + \text{CCC}(\text{=O})\text{O}$                                                              |
| 90_402_5  | 11    | 0     | -143.2 | 37.7  | $3 \text{ CO}_2 + 7 \text{ H}_2 \rightarrow 4 \text{ H}_2\text{O} + \text{CCC}(\text{=O})\text{O}$                                                              |
| 90_402_6  | 11    | 0     | -143.2 | 37.7  | $7 \text{ H}_2 + 3 \text{ CO}_2 \rightarrow 4 \text{ H}_2\text{O} + \text{CCC}(\text{=O})\text{O}$                                                              |
| 90_402_7  | 11    | 0     | -143.2 | 40.3  | $3 \text{ CO}_2 + 7 \text{ H}_2 \rightarrow 4 \text{ H}_2\text{O} + \text{CCC}(\text{=O})\text{O}$                                                              |
| 90_402_8  | 11    | 0     | -143.2 | 40.3  | $3 \text{ CO}_2 + 7 \text{ H}_2 \rightarrow 4 \text{ H}_2\text{O} + \text{CCC}(\text{=O})\text{O}$                                                              |
| 90_402_9  | 11    | 0     | -143.2 | 40.3  | $7 \text{ H}_2 + 3 \text{ CO}_2 \rightarrow 4 \text{ H}_2\text{O} + \text{CCC}(\text{=O})\text{O}$                                                              |
| 90_402_10 | 11    | 0     | -143.2 | 37.7  | $3 \text{ CO}_2 + 7 \text{ H}_2 \rightarrow 4 \text{ H}_2\text{O} + \text{CCC}(\text{=O})\text{O}$                                                              |
| 90_402_11 | 11    | 0     | -143.2 | 37.7  | $3 \text{ CO}_2 + 7 \text{ H}_2 \rightarrow 4 \text{ H}_2\text{O} + \text{CCC}(\text{=O})\text{O}$                                                              |
| 90_402_12 | 11    | 0     | -143.2 | 37.7  | $7 \text{ H}_2 + 3 \text{ CO}_2 \rightarrow 4 \text{ H}_2\text{O} + \text{CCC}(\text{=O})\text{O}$                                                              |
| 90_402_13 | 11    | 0     | -143.2 | 48.6  | $3 \text{ CO}_2 + 7 \text{ H}_2 \rightarrow 4 \text{ H}_2\text{O} + \text{CCC}(\text{=O})\text{O}$                                                              |

| Label     | $n_M$ | $n_B$ | $E_C$  | $E_H$ | Net reaction                                                                                                                                                                                                                   |
|-----------|-------|-------|--------|-------|--------------------------------------------------------------------------------------------------------------------------------------------------------------------------------------------------------------------------------|
| 90_402_14 | 11    | 0     | -143.2 | 48.6  | $3 \text{ CO}_2 + 7 \text{ H}_2 \rightarrow 4 \text{ H}_2\text{O} + \text{CCC}(=\text{O})\text{O}$                                                                                                                             |
| 90_402_15 | 11    | 0     | -143.2 | 48.6  | $3 \text{ CO}_2 + 7 \text{ H}_2 \rightarrow 4 \text{ H}_2\text{O} + \text{CCC}(=\text{O})\text{O}$                                                                                                                             |
| 90_402_16 | 11    | 0     | -143.2 | 40.5  | $3 \text{ CO}_2 + 7 \text{ H}_2 \rightarrow 4 \text{ H}_2\text{O} + \text{CCC}(=\text{O})\text{O}$                                                                                                                             |
| 90_402_17 | 11    | 0     | -143.2 | 40.5  | $3 \text{ CO}_2 + 7 \text{ H}_2 \rightarrow 4 \text{ H}_2\text{O} + \text{CCC}(=\text{O})\text{O}$                                                                                                                             |
| 90_402_18 | 11    | 0     | -143.2 | 40.5  | $7 \text{ H}_2 + 3 \text{ CO}_2 \rightarrow 4 \text{ H}_2\text{O} + \text{CCC}(=\text{O})\text{O}$                                                                                                                             |
| 90_402_19 | 11    | 0     | -143.2 | 37.8  | $3 \text{ CO}_2 + 7 \text{ H}_2 \rightarrow 4 \text{ H}_2\text{O} + \text{CCC}(=\text{O})\text{O}$                                                                                                                             |
| 90_402_20 | 11    | 0     | -143.2 | 37.8  | $3 \text{ CO}_2 + 7 \text{ H}_2 \rightarrow 4 \text{ H}_2\text{O} + \text{CCC}(=\text{O})\text{O}$                                                                                                                             |
| 90_402_21 | 11    | 0     | -143.2 | 37.8  | $7 \text{ H}_2 + 3 \text{ CO}_2 \rightarrow 4 \text{ H}_2\text{O} + \text{CCC}(=\text{O})\text{O}$                                                                                                                             |
| 90_402_22 | 11    | 0     | -143.2 | 38.9  | $3 \text{ CO}_2 + 7 \text{ H}_2 \rightarrow 4 \text{ H}_2\text{O} + \text{CCC}(=\text{O})\text{O}$                                                                                                                             |
| 90_402_23 | 11    | 0     | -143.2 | 38.9  | $3 \text{ CO}_2 + 7 \text{ H}_2 \rightarrow 4 \text{ H}_2\text{O} + \text{CCC}(=\text{O})\text{O}$                                                                                                                             |
| 90_402_24 | 11    | 0     | -143.2 | 38.9  | $7 \text{ H}_2 + 3 \text{ CO}_2 \rightarrow 4 \text{ H}_2\text{O} + \text{CCC}(=\text{O})\text{O}$                                                                                                                             |
| 90_402_25 | 11    | 0     | -143.2 | 35.3  | $3 \text{ CO}_2 + 7 \text{ H}_2 \rightarrow 4 \text{ H}_2\text{O} + \text{CCC}(=\text{O})\text{O}$                                                                                                                             |
| 90_402_26 | 11    | 0     | -143.2 | 35.3  | $3 \text{ CO}_2 + 7 \text{ H}_2 \rightarrow 4 \text{ H}_2\text{O} + \text{CCC}(=\text{O})\text{O}$                                                                                                                             |
| 90_402_27 | 11    | 0     | -143.2 | 35.3  | $7 \text{ H}_2 + 3 \text{ CO}_2 \rightarrow 4 \text{ H}_2\text{O} + \text{CCC}(=\text{O})\text{O}$                                                                                                                             |
| 90_407_1  | 7     | 0     | -51.4  | 45.4  | $3 \text{ CO}_2 + 5 \text{ H}_2 \rightarrow 2 \text{ H}_2\text{O} + \text{C}=\text{O} + \text{O}=\text{CC}(\text{O})\text{O}$                                                                                                  |
| 90_407_2  | 6     | 0     | -45.4  | 45.4  | $4 \text{ H}_2 + 2 \text{ CO}_2 + \text{OCC}(=\text{O})\text{C}(=\text{O})\text{O} \rightarrow$<br>$\rightarrow \text{OCC}(=\text{O})\text{O} + \text{H}_2\text{O} + \text{C}=\text{O} + \text{O}=\text{CC}(\text{O})\text{O}$ |
| 90_407_3  | 8     | 0     | -51.4  | 45.1  | $3 \text{ CO}_2 + 5 \text{ H}_2 \rightarrow 2 \text{ H}_2\text{O} + \text{C}=\text{O} + \text{O}=\text{CC}(\text{O})\text{O}$                                                                                                  |

| Label     | $n_M$ | $n_B$ | $E_C$  | $E_H$ | Net reaction                                                                                                                               |
|-----------|-------|-------|--------|-------|--------------------------------------------------------------------------------------------------------------------------------------------|
| 90_407.4  | 8     | 0     | -51.4  | 43.9  | $3 \text{ CO}_2 + 5 \text{ H}_2 \rightarrow 2 \text{ H}_2\text{O} + \text{C}=\text{O} + \text{O}=\text{CC}(\text{O})\text{O}$              |
| 90_407.5  | 7     | 0     | -51.4  | 39.5  | $5 \text{ H}_2 + 3 \text{ CO}_2 \rightarrow 2 \text{ H}_2\text{O} + \text{C}=\text{O} + \text{O}=\text{CC}(\text{O})\text{O}$              |
| 90_407.6  | 8     | 0     | -51.4  | 45.7  | $3 \text{ CO}_2 + 5 \text{ H}_2 \rightarrow 2 \text{ H}_2\text{O} + \text{C}=\text{O} + \text{O}=\text{CC}(\text{O})\text{O}$              |
| 90_412.1  | 17    | 0     | -187.3 | 47.4  | $5 \text{ CO}_2 + 10 \text{ H}_2 \rightarrow 6 \text{ H}_2\text{O} + \text{CC}=\text{O} + \text{O}=\text{CCC}(=\text{O})\text{O}$          |
| 90_412.2  | 17    | 0     | -187.3 | 47.4  | $5 \text{ CO}_2 + 10 \text{ H}_2 \rightarrow 6 \text{ H}_2\text{O} + \text{CC}=\text{O} + \text{O}=\text{CCC}(=\text{O})\text{O}$          |
| 90_412.3  | 16    | 1     | -172.7 | 47.4  | $5 \text{ CO}_2 + 9 \text{ H}_2 \rightarrow \text{CC}(=\text{O})\text{O} + 5 \text{ H}_2\text{O} + \text{O}=\text{CCC}(=\text{O})\text{O}$ |
| 90_412.4  | 16    | 1     | -172.7 | 47.4  | $5 \text{ CO}_2 + 9 \text{ H}_2 \rightarrow \text{CC}(=\text{O})\text{O} + 5 \text{ H}_2\text{O} + \text{O}=\text{CCC}(=\text{O})\text{O}$ |
| 90_412.5  | 17    | 1     | -172.7 | 47.4  | $5 \text{ CO}_2 + 9 \text{ H}_2 \rightarrow \text{CC}(=\text{O})\text{O} + 5 \text{ H}_2\text{O} + \text{O}=\text{CCC}(=\text{O})\text{O}$ |
| 90_412.6  | 17    | 0     | -187.3 | 47.4  | $5 \text{ CO}_2 + 10 \text{ H}_2 \rightarrow 6 \text{ H}_2\text{O} + \text{CC}=\text{O} + \text{O}=\text{CCC}(=\text{O})\text{O}$          |
| 90_412.7  | 17    | 0     | -187.3 | 47.4  | $5 \text{ CO}_2 + 10 \text{ H}_2 \rightarrow 6 \text{ H}_2\text{O} + \text{CC}=\text{O} + \text{O}=\text{CCC}(=\text{O})\text{O}$          |
| 90_412.8  | 16    | 1     | -172.7 | 47.4  | $5 \text{ CO}_2 + 9 \text{ H}_2 \rightarrow \text{CC}(=\text{O})\text{O} + 5 \text{ H}_2\text{O} + \text{O}=\text{CCC}(=\text{O})\text{O}$ |
| 90_412.9  | 16    | 1     | -172.7 | 47.4  | $5 \text{ CO}_2 + 9 \text{ H}_2 \rightarrow \text{CC}(=\text{O})\text{O} + 5 \text{ H}_2\text{O} + \text{O}=\text{CCC}(=\text{O})\text{O}$ |
| 90_412.10 | 17    | 1     | -172.7 | 47.4  | $5 \text{ CO}_2 + 9 \text{ H}_2 \rightarrow \text{CC}(=\text{O})\text{O} + 5 \text{ H}_2\text{O} + \text{O}=\text{CCC}(=\text{O})\text{O}$ |
| 90_412.11 | 17    | 0     | -187.3 | 47.1  | $5 \text{ CO}_2 + 10 \text{ H}_2 \rightarrow 6 \text{ H}_2\text{O} + \text{CC}=\text{O} + \text{O}=\text{CCC}(=\text{O})\text{O}$          |
| 90_412.12 | 17    | 0     | -187.3 | 47.1  | $5 \text{ CO}_2 + 10 \text{ H}_2 \rightarrow 6 \text{ H}_2\text{O} + \text{CC}=\text{O} + \text{O}=\text{CCC}(=\text{O})\text{O}$          |
| 90_412.13 | 16    | 1     | -172.7 | 47.1  | $5 \text{ CO}_2 + 9 \text{ H}_2 \rightarrow \text{CC}(=\text{O})\text{O} + 5 \text{ H}_2\text{O} + \text{O}=\text{CCC}(=\text{O})\text{O}$ |
| 90_412.14 | 16    | 1     | -172.7 | 47.1  | $5 \text{ CO}_2 + 9 \text{ H}_2 \rightarrow \text{CC}(=\text{O})\text{O} + 5 \text{ H}_2\text{O} + \text{O}=\text{CCC}(=\text{O})\text{O}$ |
| 90_412.15 | 17    | 1     | -172.7 | 47.1  | $5 \text{ CO}_2 + 9 \text{ H}_2 \rightarrow \text{CC}(=\text{O})\text{O} + 5 \text{ H}_2\text{O} + \text{O}=\text{CCC}(=\text{O})\text{O}$ |



| Label     | $n_M$ | $n_B$ | $E_C$  | $E_H$ | Net reaction                                                                                                                               |
|-----------|-------|-------|--------|-------|--------------------------------------------------------------------------------------------------------------------------------------------|
| 90_412_16 | 17    | 0     | -187.3 | 45.8  | $5 \text{ CO}_2 + 10 \text{ H}_2 \rightarrow 6 \text{ H}_2\text{O} + \text{CC}=\text{O} + \text{O}=\text{CCC}(=\text{O})\text{O}$          |
| 90_412_17 | 17    | 0     | -187.3 | 45.8  | $5 \text{ CO}_2 + 10 \text{ H}_2 \rightarrow 6 \text{ H}_2\text{O} + \text{CC}=\text{O} + \text{O}=\text{CCC}(=\text{O})\text{O}$          |
| 90_412_18 | 16    | 1     | -172.7 | 45.8  | $5 \text{ CO}_2 + 9 \text{ H}_2 \rightarrow \text{CC}(=\text{O})\text{O} + 5 \text{ H}_2\text{O} + \text{O}=\text{CCC}(=\text{O})\text{O}$ |
| 90_412_19 | 16    | 1     | -172.7 | 45.8  | $5 \text{ CO}_2 + 9 \text{ H}_2 \rightarrow \text{CC}(=\text{O})\text{O} + 5 \text{ H}_2\text{O} + \text{O}=\text{CCC}(=\text{O})\text{O}$ |
| 90_412_20 | 17    | 1     | -172.7 | 45.8  | $5 \text{ CO}_2 + 9 \text{ H}_2 \rightarrow \text{CC}(=\text{O})\text{O} + 5 \text{ H}_2\text{O} + \text{O}=\text{CCC}(=\text{O})\text{O}$ |
| 90_412_21 | 17    | 0     | -187.3 | 41.5  | $5 \text{ CO}_2 + 10 \text{ H}_2 \rightarrow 6 \text{ H}_2\text{O} + \text{CC}=\text{O} + \text{O}=\text{CCC}(=\text{O})\text{O}$          |
| 90_412_22 | 17    | 0     | -187.3 | 41.5  | $5 \text{ CO}_2 + 10 \text{ H}_2 \rightarrow 6 \text{ H}_2\text{O} + \text{CC}=\text{O} + \text{O}=\text{CCC}(=\text{O})\text{O}$          |
| 90_412_23 | 16    | 1     | -172.7 | 41.5  | $5 \text{ CO}_2 + 9 \text{ H}_2 \rightarrow \text{CC}(=\text{O})\text{O} + 5 \text{ H}_2\text{O} + \text{O}=\text{CCC}(=\text{O})\text{O}$ |
| 90_412_24 | 16    | 1     | -172.7 | 41.5  | $5 \text{ CO}_2 + 9 \text{ H}_2 \rightarrow \text{CC}(=\text{O})\text{O} + 5 \text{ H}_2\text{O} + \text{O}=\text{CCC}(=\text{O})\text{O}$ |
| 90_412_25 | 17    | 1     | -172.7 | 41.5  | $5 \text{ CO}_2 + 9 \text{ H}_2 \rightarrow \text{CC}(=\text{O})\text{O} + 5 \text{ H}_2\text{O} + \text{O}=\text{CCC}(=\text{O})\text{O}$ |
| 90_412_26 | 17    | 0     | -187.3 | 45.8  | $5 \text{ CO}_2 + 10 \text{ H}_2 \rightarrow 6 \text{ H}_2\text{O} + \text{CC}=\text{O} + \text{O}=\text{CCC}(=\text{O})\text{O}$          |
| 90_412_27 | 17    | 0     | -187.3 | 45.8  | $5 \text{ CO}_2 + 10 \text{ H}_2 \rightarrow 6 \text{ H}_2\text{O} + \text{CC}=\text{O} + \text{O}=\text{CCC}(=\text{O})\text{O}$          |
| 90_412_28 | 16    | 1     | -172.7 | 45.8  | $5 \text{ CO}_2 + 9 \text{ H}_2 \rightarrow \text{CC}(=\text{O})\text{O} + 5 \text{ H}_2\text{O} + \text{O}=\text{CCC}(=\text{O})\text{O}$ |
| 90_412_29 | 16    | 1     | -172.7 | 45.8  | $5 \text{ CO}_2 + 9 \text{ H}_2 \rightarrow \text{CC}(=\text{O})\text{O} + 5 \text{ H}_2\text{O} + \text{O}=\text{CCC}(=\text{O})\text{O}$ |
| 90_412_30 | 17    | 1     | -172.7 | 45.8  | $5 \text{ CO}_2 + 9 \text{ H}_2 \rightarrow \text{CC}(=\text{O})\text{O} + 5 \text{ H}_2\text{O} + \text{O}=\text{CCC}(=\text{O})\text{O}$ |
| 90_425_1  | 11    | 1     | -108.1 | 40.3  | $3 \text{ CO}_2 + 6 \text{ H}_2 \rightarrow \text{OC}(=\text{O})\text{C}(\text{O})\text{C} + 3 \text{ H}_2\text{O}$                        |
| 90_425_2  | 11    | 1     | -108.1 | 40.3  | $3 \text{ CO}_2 + 6 \text{ H}_2 \rightarrow \text{OC}(=\text{O})\text{C}(\text{O})\text{C} + 3 \text{ H}_2\text{O}$                        |
| 90_425_3  | 11    | 1     | -108.1 | 40.3  | $6 \text{ H}_2 + 3 \text{ CO}_2 \rightarrow \text{OC}(=\text{O})\text{C}(\text{O})\text{C} + 3 \text{ H}_2\text{O}$                        |

| Label     | $n_M$ | $n_B$ | $E_C$  | $E_H$ | Net reaction                                                                                                        |
|-----------|-------|-------|--------|-------|---------------------------------------------------------------------------------------------------------------------|
| 90_425_4  | 11    | 0     | -108.1 | 37.7  | $3 \text{ CO}_2 + 6 \text{ H}_2 \rightarrow 3 \text{ H}_2\text{O} + \text{OC}(=\text{O})\text{C}(\text{O})\text{C}$ |
| 90_425_5  | 11    | 0     | -108.1 | 36.1  | $3 \text{ CO}_2 + 6 \text{ H}_2 \rightarrow 3 \text{ H}_2\text{O} + \text{OC}(=\text{O})\text{C}(\text{O})\text{C}$ |
| 90_425_6  | 11    | 0     | -108.1 | 35.4  | $6 \text{ H}_2 + 3 \text{ CO}_2 \rightarrow 3 \text{ H}_2\text{O} + \text{OC}(=\text{O})\text{C}(\text{O})\text{C}$ |
| 90_425_7  | 11    | 1     | -108.1 | 40.3  | $3 \text{ CO}_2 + 6 \text{ H}_2 \rightarrow \text{OC}(=\text{O})\text{C}(\text{O})\text{C} + 3 \text{ H}_2\text{O}$ |
| 90_425_8  | 11    | 1     | -108.1 | 40.3  | $3 \text{ CO}_2 + 6 \text{ H}_2 \rightarrow \text{OC}(=\text{O})\text{C}(\text{O})\text{C} + 3 \text{ H}_2\text{O}$ |
| 90_425_9  | 11    | 1     | -108.1 | 40.3  | $6 \text{ H}_2 + 3 \text{ CO}_2 \rightarrow \text{OC}(=\text{O})\text{C}(\text{O})\text{C} + 3 \text{ H}_2\text{O}$ |
| 90_425_10 | 11    | 0     | -108.1 | 37.7  | $3 \text{ CO}_2 + 6 \text{ H}_2 \rightarrow 3 \text{ H}_2\text{O} + \text{OC}(=\text{O})\text{C}(\text{O})\text{C}$ |
| 90_425_11 | 11    | 0     | -108.1 | 36.1  | $3 \text{ CO}_2 + 6 \text{ H}_2 \rightarrow 3 \text{ H}_2\text{O} + \text{OC}(=\text{O})\text{C}(\text{O})\text{C}$ |
| 90_425_12 | 11    | 0     | -108.1 | 35.4  | $6 \text{ H}_2 + 3 \text{ CO}_2 \rightarrow 3 \text{ H}_2\text{O} + \text{OC}(=\text{O})\text{C}(\text{O})\text{C}$ |
| 90_425_13 | 11    | 1     | -108.1 | 48.6  | $3 \text{ CO}_2 + 6 \text{ H}_2 \rightarrow \text{OC}(=\text{O})\text{C}(\text{O})\text{C} + 3 \text{ H}_2\text{O}$ |
| 90_425_14 | 11    | 1     | -108.1 | 48.6  | $3 \text{ CO}_2 + 6 \text{ H}_2 \rightarrow \text{OC}(=\text{O})\text{C}(\text{O})\text{C} + 3 \text{ H}_2\text{O}$ |
| 90_425_15 | 11    | 1     | -108.1 | 48.6  | $3 \text{ CO}_2 + 6 \text{ H}_2 \rightarrow \text{OC}(=\text{O})\text{C}(\text{O})\text{C} + 3 \text{ H}_2\text{O}$ |
| 90_425_16 | 11    | 1     | -108.1 | 40.5  | $3 \text{ CO}_2 + 6 \text{ H}_2 \rightarrow \text{OC}(=\text{O})\text{C}(\text{O})\text{C} + 3 \text{ H}_2\text{O}$ |
| 90_425_17 | 11    | 1     | -108.1 | 40.5  | $3 \text{ CO}_2 + 6 \text{ H}_2 \rightarrow \text{OC}(=\text{O})\text{C}(\text{O})\text{C} + 3 \text{ H}_2\text{O}$ |
| 90_425_18 | 11    | 1     | -108.1 | 40.5  | $6 \text{ H}_2 + 3 \text{ CO}_2 \rightarrow \text{OC}(=\text{O})\text{C}(\text{O})\text{C} + 3 \text{ H}_2\text{O}$ |
| 90_425_19 | 11    | 0     | -108.1 | 37.8  | $3 \text{ CO}_2 + 6 \text{ H}_2 \rightarrow 3 \text{ H}_2\text{O} + \text{OC}(=\text{O})\text{C}(\text{O})\text{C}$ |
| 90_425_20 | 11    | 0     | -108.1 | 36.2  | $3 \text{ CO}_2 + 6 \text{ H}_2 \rightarrow 3 \text{ H}_2\text{O} + \text{OC}(=\text{O})\text{C}(\text{O})\text{C}$ |
| 90_425_21 | 11    | 0     | -108.1 | 35.5  | $6 \text{ H}_2 + 3 \text{ CO}_2 \rightarrow 3 \text{ H}_2\text{O} + \text{OC}(=\text{O})\text{C}(\text{O})\text{C}$ |

| Label     | $n_M$ | $n_B$ | $E_C$  | $E_H$ | Net reaction                                                                                                        |
|-----------|-------|-------|--------|-------|---------------------------------------------------------------------------------------------------------------------|
| 90_425_22 | 11    | 0     | -108.1 | 38.9  | $3 \text{ CO}_2 + 6 \text{ H}_2 \rightarrow 3 \text{ H}_2\text{O} + \text{OC}(=\text{O})\text{C}(\text{O})\text{C}$ |
| 90_425_23 | 11    | 0     | -108.1 | 37.2  | $3 \text{ CO}_2 + 6 \text{ H}_2 \rightarrow 3 \text{ H}_2\text{O} + \text{OC}(=\text{O})\text{C}(\text{O})\text{C}$ |
| 90_425_24 | 11    | 0     | -108.1 | 36.5  | $6 \text{ H}_2 + 3 \text{ CO}_2 \rightarrow 3 \text{ H}_2\text{O} + \text{OC}(=\text{O})\text{C}(\text{O})\text{C}$ |
| 90_425_25 | 11    | 0     | -108.1 | 35.3  | $3 \text{ CO}_2 + 6 \text{ H}_2 \rightarrow 3 \text{ H}_2\text{O} + \text{OC}(=\text{O})\text{C}(\text{O})\text{C}$ |
| 90_425_26 | 11    | 0     | -108.1 | 33.7  | $3 \text{ CO}_2 + 6 \text{ H}_2 \rightarrow 3 \text{ H}_2\text{O} + \text{OC}(=\text{O})\text{C}(\text{O})\text{C}$ |
| 90_425_27 | 11    | 0     | -108.1 | 33.0  | $6 \text{ H}_2 + 3 \text{ CO}_2 \rightarrow 3 \text{ H}_2\text{O} + \text{OC}(=\text{O})\text{C}(\text{O})\text{C}$ |
| 90_428_1  | 11    | 0     | -107.5 | 40.3  | $3 \text{ CO}_2 + 6 \text{ H}_2 \rightarrow 3 \text{ H}_2\text{O} + \text{OCCC}(=\text{O})\text{O}$                 |
| 90_428_2  | 11    | 0     | -107.5 | 40.3  | $3 \text{ CO}_2 + 6 \text{ H}_2 \rightarrow 3 \text{ H}_2\text{O} + \text{OCCC}(=\text{O})\text{O}$                 |
| 90_428_3  | 11    | 0     | -107.5 | 40.3  | $6 \text{ H}_2 + 3 \text{ CO}_2 \rightarrow 3 \text{ H}_2\text{O} + \text{OCCC}(=\text{O})\text{O}$                 |
| 90_428_4  | 11    | 1     | -107.5 | 37.7  | $3 \text{ CO}_2 + 6 \text{ H}_2 \rightarrow \text{OCCC}(=\text{O})\text{O} + 3 \text{ H}_2\text{O}$                 |
| 90_428_5  | 11    | 1     | -107.5 | 36.1  | $3 \text{ CO}_2 + 6 \text{ H}_2 \rightarrow \text{OCCC}(=\text{O})\text{O} + 3 \text{ H}_2\text{O}$                 |
| 90_428_6  | 11    | 1     | -107.5 | 35.4  | $6 \text{ H}_2 + 3 \text{ CO}_2 \rightarrow \text{OCCC}(=\text{O})\text{O} + 3 \text{ H}_2\text{O}$                 |
| 90_428_7  | 11    | 0     | -107.5 | 40.3  | $3 \text{ CO}_2 + 6 \text{ H}_2 \rightarrow 3 \text{ H}_2\text{O} + \text{OCCC}(=\text{O})\text{O}$                 |
| 90_428_8  | 11    | 0     | -107.5 | 40.3  | $3 \text{ CO}_2 + 6 \text{ H}_2 \rightarrow 3 \text{ H}_2\text{O} + \text{OCCC}(=\text{O})\text{O}$                 |
| 90_428_9  | 11    | 0     | -107.5 | 40.3  | $6 \text{ H}_2 + 3 \text{ CO}_2 \rightarrow 3 \text{ H}_2\text{O} + \text{OCCC}(=\text{O})\text{O}$                 |
| 90_428_10 | 11    | 1     | -107.5 | 37.7  | $3 \text{ CO}_2 + 6 \text{ H}_2 \rightarrow \text{OCCC}(=\text{O})\text{O} + 3 \text{ H}_2\text{O}$                 |
| 90_428_11 | 11    | 1     | -107.5 | 36.1  | $3 \text{ CO}_2 + 6 \text{ H}_2 \rightarrow \text{OCCC}(=\text{O})\text{O} + 3 \text{ H}_2\text{O}$                 |
| 90_428_12 | 11    | 1     | -107.5 | 35.4  | $6 \text{ H}_2 + 3 \text{ CO}_2 \rightarrow \text{OCCC}(=\text{O})\text{O} + 3 \text{ H}_2\text{O}$                 |

| Label      | $n_M$ | $n_B$ | $E_C$  | $E_H$ | Net reaction                                                                                    |
|------------|-------|-------|--------|-------|-------------------------------------------------------------------------------------------------|
| 90_428_13  | 11    | 0     | -107.5 | 48.6  | $3 \text{ CO}_2 + 6 \text{ H}_2 \rightarrow 3 \text{ H}_2\text{O} + \text{OCCC(=O)O}$           |
| 90_428_14  | 11    | 0     | -107.5 | 48.6  | $3 \text{ CO}_2 + 6 \text{ H}_2 \rightarrow 3 \text{ H}_2\text{O} + \text{OCCC(=O)O}$           |
| 90_428_15  | 11    | 0     | -107.5 | 48.6  | $3 \text{ CO}_2 + 6 \text{ H}_2 \rightarrow 3 \text{ H}_2\text{O} + \text{OCCC(=O)O}$           |
| 90_428_16  | 11    | 0     | -107.5 | 40.5  | $3 \text{ CO}_2 + 6 \text{ H}_2 \rightarrow 3 \text{ H}_2\text{O} + \text{OCCC(=O)O}$           |
| 90_428_17  | 11    | 0     | -107.5 | 40.5  | $3 \text{ CO}_2 + 6 \text{ H}_2 \rightarrow 3 \text{ H}_2\text{O} + \text{OCCC(=O)O}$           |
| 90_428_18  | 11    | 0     | -107.5 | 40.5  | $6 \text{ H}_2 + 3 \text{ CO}_2 \rightarrow 3 \text{ H}_2\text{O} + \text{OCCC(=O)O}$           |
| 90_428_19  | 11    | 1     | -107.5 | 37.8  | $3 \text{ CO}_2 + 6 \text{ H}_2 \rightarrow \text{OCCC(=O)O} + 3 \text{ H}_2\text{O}$           |
| 90_428_20  | 11    | 1     | -107.5 | 36.2  | $3 \text{ CO}_2 + 6 \text{ H}_2 \rightarrow \text{OCCC(=O)O} + 3 \text{ H}_2\text{O}$           |
| 90_428_21  | 11    | 1     | -107.5 | 35.5  | $6 \text{ H}_2 + 3 \text{ CO}_2 \rightarrow \text{OCCC(=O)O} + 3 \text{ H}_2\text{O}$           |
| 90_428_22  | 11    | 1     | -107.5 | 38.9  | $3 \text{ CO}_2 + 6 \text{ H}_2 \rightarrow \text{OCCC(=O)O} + 3 \text{ H}_2\text{O}$           |
| 90_428_23  | 11    | 1     | -107.5 | 37.2  | $3 \text{ CO}_2 + 6 \text{ H}_2 \rightarrow \text{OCCC(=O)O} + 3 \text{ H}_2\text{O}$           |
| 90_428_24  | 11    | 1     | -107.5 | 36.5  | $6 \text{ H}_2 + 3 \text{ CO}_2 \rightarrow \text{OCCC(=O)O} + 3 \text{ H}_2\text{O}$           |
| 90_428_25  | 11    | 0     | -107.5 | 35.3  | $3 \text{ CO}_2 + 6 \text{ H}_2 \rightarrow 3 \text{ H}_2\text{O} + \text{OCCC(=O)O}$           |
| 90_428_26  | 11    | 0     | -107.5 | 33.7  | $3 \text{ CO}_2 + 6 \text{ H}_2 \rightarrow 3 \text{ H}_2\text{O} + \text{OCCC(=O)O}$           |
| 90_428_27  | 11    | 0     | -107.5 | 33.0  | $6 \text{ H}_2 + 3 \text{ CO}_2 \rightarrow 3 \text{ H}_2\text{O} + \text{OCCC(=O)O}$           |
| 90_447_218 | 15    | 0     | -194.1 | 38.9  | $4 \text{ CO}_2 + 10 \text{ H}_2 \rightarrow 6 \text{ H}_2\text{O} + 2 \text{ CC=O}$            |
| 90_447_223 | 16    | 0     | -181.7 | 41.3  | $4 \text{ CO}_2 + 10 \text{ H}_2 \rightarrow 6 \text{ H}_2\text{O} + \text{CCC=O} + \text{C=O}$ |
| 90_447_224 | 15    | 0     | -194.1 | 38.9  | $4 \text{ CO}_2 + 10 \text{ H}_2 \rightarrow 6 \text{ H}_2\text{O} + 2 \text{ CC=O}$            |

| Label      | $n_M$ | $n_B$ | $E_C$  | $E_H$ | Net reaction                                                                                                    |
|------------|-------|-------|--------|-------|-----------------------------------------------------------------------------------------------------------------|
| 90_447_230 | 15    | 0     | -194.1 | 38.9  | $4 \text{ CO}_2 + 10 \text{ H}_2 \rightarrow 6 \text{ H}_2\text{O} + 2 \text{ CC}=\text{O}$                     |
| 90_447_236 | 16    | 0     | -194.1 | 38.9  | $4 \text{ CO}_2 + 10 \text{ H}_2 \rightarrow 6 \text{ H}_2\text{O} + 2 \text{ CC}=\text{O}$                     |
| 90_447_241 | 16    | 0     | -181.7 | 41.3  | $4 \text{ CO}_2 + 10 \text{ H}_2 \rightarrow 6 \text{ H}_2\text{O} + \text{ CCC}=\text{O} + \text{ C}=\text{O}$ |
| 90_447_242 | 16    | 0     | -194.1 | 38.9  | $4 \text{ CO}_2 + 10 \text{ H}_2 \rightarrow 6 \text{ H}_2\text{O} + 2 \text{ CC}=\text{O}$                     |
| 90_447_248 | 16    | 0     | -194.1 | 38.9  | $4 \text{ CO}_2 + 10 \text{ H}_2 \rightarrow 6 \text{ H}_2\text{O} + 2 \text{ CC}=\text{O}$                     |
| 90_447_259 | 16    | 0     | -181.7 | 40.3  | $4 \text{ CO}_2 + 10 \text{ H}_2 \rightarrow 6 \text{ H}_2\text{O} + \text{ CCC}=\text{O} + \text{ C}=\text{O}$ |
| 90_447_272 | 16    | 0     | -194.1 | 38.9  | $4 \text{ CO}_2 + 10 \text{ H}_2 \rightarrow 6 \text{ H}_2\text{O} + 2 \text{ CC}=\text{O}$                     |
| 90_447_277 | 16    | 0     | -181.7 | 41.3  | $4 \text{ CO}_2 + 10 \text{ H}_2 \rightarrow 6 \text{ H}_2\text{O} + \text{ CCC}=\text{O} + \text{ C}=\text{O}$ |
| 90_447_278 | 16    | 0     | -194.1 | 38.9  | $4 \text{ CO}_2 + 10 \text{ H}_2 \rightarrow 6 \text{ H}_2\text{O} + 2 \text{ CC}=\text{O}$                     |
| 90_447_284 | 16    | 0     | -194.1 | 38.9  | $4 \text{ CO}_2 + 10 \text{ H}_2 \rightarrow 6 \text{ H}_2\text{O} + 2 \text{ CC}=\text{O}$                     |
| 90_447_295 | 16    | 0     | -181.7 | 40.3  | $4 \text{ CO}_2 + 10 \text{ H}_2 \rightarrow 6 \text{ H}_2\text{O} + \text{ CCC}=\text{O} + \text{ C}=\text{O}$ |
| 90_447_309 | 16    | 0     | -194.1 | 38.9  | $4 \text{ CO}_2 + 10 \text{ H}_2 \rightarrow 6 \text{ H}_2\text{O} + 2 \text{ CC}=\text{O}$                     |
| 90_447_313 | 16    | 0     | -181.7 | 41.3  | $4 \text{ CO}_2 + 10 \text{ H}_2 \rightarrow 6 \text{ H}_2\text{O} + \text{ CCC}=\text{O} + \text{ C}=\text{O}$ |
| 90_447_315 | 16    | 0     | -194.1 | 38.9  | $4 \text{ CO}_2 + 10 \text{ H}_2 \rightarrow 6 \text{ H}_2\text{O} + 2 \text{ CC}=\text{O}$                     |
| 90_447_321 | 16    | 0     | -194.1 | 38.9  | $4 \text{ CO}_2 + 10 \text{ H}_2 \rightarrow 6 \text{ H}_2\text{O} + 2 \text{ CC}=\text{O}$                     |
| 90_447_331 | 16    | 0     | -181.7 | 40.3  | $4 \text{ CO}_2 + 10 \text{ H}_2 \rightarrow 6 \text{ H}_2\text{O} + \text{ CCC}=\text{O} + \text{ C}=\text{O}$ |
| 90_447_344 | 16    | 0     | -194.1 | 38.9  | $4 \text{ CO}_2 + 10 \text{ H}_2 \rightarrow 6 \text{ H}_2\text{O} + 2 \text{ CC}=\text{O}$                     |
| 90_447_349 | 16    | 0     | -181.7 | 41.3  | $4 \text{ CO}_2 + 10 \text{ H}_2 \rightarrow 6 \text{ H}_2\text{O} + \text{ CCC}=\text{O} + \text{ C}=\text{O}$ |

| Label      | $n_M$ | $n_B$ | $E_C$  | $E_H$ | Net reaction                                                                                                                    |
|------------|-------|-------|--------|-------|---------------------------------------------------------------------------------------------------------------------------------|
| 90_447_350 | 16    | 0     | -194.1 | 38.9  | $4 \text{ CO}_2 + 10 \text{ H}_2 \rightarrow 6 \text{ H}_2\text{O} + 2 \text{ CC}=\text{O}$                                     |
| 90_447_356 | 16    | 0     | -194.1 | 38.9  | $4 \text{ CO}_2 + 10 \text{ H}_2 \rightarrow 6 \text{ H}_2\text{O} + 2 \text{ CC}=\text{O}$                                     |
| 90_447_367 | 16    | 0     | -181.7 | 41.1  | $4 \text{ CO}_2 + 10 \text{ H}_2 \rightarrow 6 \text{ H}_2\text{O} + \text{ CCC}=\text{O} + \text{ C}=\text{O}$                 |
| 90_447_381 | 16    | 0     | -194.1 | 38.9  | $4 \text{ CO}_2 + 10 \text{ H}_2 \rightarrow 6 \text{ H}_2\text{O} + 2 \text{ CC}=\text{O}$                                     |
| 90_447_385 | 16    | 0     | -181.7 | 41.3  | $4 \text{ CO}_2 + 10 \text{ H}_2 \rightarrow 6 \text{ H}_2\text{O} + \text{ CCC}=\text{O} + \text{ C}=\text{O}$                 |
| 90_447_387 | 16    | 0     | -194.1 | 38.9  | $4 \text{ CO}_2 + 10 \text{ H}_2 \rightarrow 6 \text{ H}_2\text{O} + 2 \text{ CC}=\text{O}$                                     |
| 90_447_393 | 16    | 0     | -194.1 | 38.9  | $4 \text{ CO}_2 + 10 \text{ H}_2 \rightarrow 6 \text{ H}_2\text{O} + 2 \text{ CC}=\text{O}$                                     |
| 90_447_403 | 16    | 0     | -181.7 | 41.1  | $4 \text{ CO}_2 + 10 \text{ H}_2 \rightarrow 6 \text{ H}_2\text{O} + \text{ CCC}=\text{O} + \text{ C}=\text{O}$                 |
| 90_447_417 | 16    | 0     | -194.1 | 39.3  | $4 \text{ CO}_2 + 10 \text{ H}_2 \rightarrow 6 \text{ H}_2\text{O} + 2 \text{ CC}=\text{O}$                                     |
| 90_447_421 | 16    | 0     | -181.7 | 41.7  | $4 \text{ CO}_2 + 10 \text{ H}_2 \rightarrow 6 \text{ H}_2\text{O} + \text{ CCC}=\text{O} + \text{ C}=\text{O}$                 |
| 90_447_423 | 16    | 0     | -194.1 | 39.3  | $4 \text{ CO}_2 + 10 \text{ H}_2 \rightarrow 6 \text{ H}_2\text{O} + 2 \text{ CC}=\text{O}$                                     |
| 90_447_429 | 16    | 0     | -194.1 | 39.3  | $4 \text{ CO}_2 + 10 \text{ H}_2 \rightarrow 6 \text{ H}_2\text{O} + 2 \text{ CC}=\text{O}$                                     |
| 90_447_439 | 16    | 0     | -181.7 | 41.7  | $4 \text{ CO}_2 + 10 \text{ H}_2 \rightarrow 6 \text{ H}_2\text{O} + \text{ CCC}=\text{O} + \text{ C}=\text{O}$                 |
| 90_458_1   | 8     | 0     | -51.4  | 45.4  | $3 \text{ CO}_2 + 5 \text{ H}_2 \rightarrow 2 \text{ H}_2\text{O} + \text{ C}=\text{O} + \text{ O}=\text{CC}(\text{O})\text{O}$ |
| 90_458_5   | 8     | 0     | -51.4  | 39.5  | $5 \text{ H}_2 + 3 \text{ CO}_2 \rightarrow 2 \text{ H}_2\text{O} + \text{ C}=\text{O} + \text{ O}=\text{CC}(\text{O})\text{O}$ |
| 90_471_2   | 16    | 0     | -181.7 | 41.3  | $4 \text{ CO}_2 + 10 \text{ H}_2 \rightarrow 6 \text{ H}_2\text{O} + \text{ CCC}=\text{O} + \text{ C}=\text{O}$                 |
| 90_471_4   | 18    | 0     | -181.7 | 41.3  | $4 \text{ CO}_2 + 10 \text{ H}_2 \rightarrow 6 \text{ H}_2\text{O} + \text{ CCC}=\text{O} + \text{ C}=\text{O}$                 |
| 90_471_5   | 17    | 0     | -181.7 | 41.3  | $4 \text{ CO}_2 + 10 \text{ H}_2 \rightarrow 6 \text{ H}_2\text{O} + \text{ CCC}=\text{O} + \text{ C}=\text{O}$                 |

| Label     | $n_M$ | $n_B$ | $E_C$  | $E_H$ | Net reaction                                                                                                                                                                                                     |
|-----------|-------|-------|--------|-------|------------------------------------------------------------------------------------------------------------------------------------------------------------------------------------------------------------------|
| 90_471.6  | 16    | 0     | -175.7 | 41.3  | $9 \text{ H}_2 + 3 \text{ CO}_2 + \text{OCC}(=\text{O})\text{C}(=\text{O})\text{O} \rightarrow$<br>$\rightarrow 5 \text{ H}_2\text{O} + \text{OCC}(=\text{O})\text{O} + \text{CCC}=\text{O} + \text{C}=\text{O}$ |
| 90_471.7  | 18    | 0     | -181.7 | 38.7  | $4 \text{ CO}_2 + 10 \text{ H}_2 \rightarrow 6 \text{ H}_2\text{O} + \text{CCC}=\text{O} + \text{C}=\text{O}$                                                                                                    |
| 90_471.8  | 17    | 0     | -181.7 | 37.1  | $4 \text{ CO}_2 + 10 \text{ H}_2 \rightarrow 6 \text{ H}_2\text{O} + \text{CCC}=\text{O} + \text{C}=\text{O}$                                                                                                    |
| 90_471.9  | 16    | 0     | -175.7 | 36.4  | $9 \text{ H}_2 + 3 \text{ CO}_2 + \text{OCC}(=\text{O})\text{C}(=\text{O})\text{O} \rightarrow$<br>$\rightarrow 5 \text{ H}_2\text{O} + \text{OCC}(=\text{O})\text{O} + \text{CCC}=\text{O} + \text{C}=\text{O}$ |
| 90_486.1  | 12    | 0     | -135.3 | 53.3  | $4 \text{ CO}_2 + 7 \text{ H}_2 \rightarrow 4 \text{ H}_2\text{O} + \text{OC}(=\text{O})\text{CCC}(=\text{O})\text{O}$                                                                                           |
| 90_486.2  | 12    | 0     | -135.3 | 53.3  | $7 \text{ H}_2 + 4 \text{ CO}_2 \rightarrow 4 \text{ H}_2\text{O} + \text{OC}(=\text{O})\text{CCC}(=\text{O})\text{O}$                                                                                           |
| 90_486.3  | 12    | 0     | -135.3 | 53.3  | $4 \text{ CO}_2 + 7 \text{ H}_2 \rightarrow 4 \text{ H}_2\text{O} + \text{OC}(=\text{O})\text{CCC}(=\text{O})\text{O}$                                                                                           |
| 90_486.4  | 12    | 0     | -135.3 | 53.3  | $4 \text{ CO}_2 + 7 \text{ H}_2 \rightarrow 4 \text{ H}_2\text{O} + \text{OC}(=\text{O})\text{CCC}(=\text{O})\text{O}$                                                                                           |
| 90_486.5  | 12    | 0     | -135.3 | 53.3  | $7 \text{ H}_2 + 4 \text{ CO}_2 \rightarrow 4 \text{ H}_2\text{O} + \text{OC}(=\text{O})\text{CCC}(=\text{O})\text{O}$                                                                                           |
| 90_486.6  | 12    | 0     | -135.3 | 53.3  | $4 \text{ CO}_2 + 7 \text{ H}_2 \rightarrow 4 \text{ H}_2\text{O} + \text{OC}(=\text{O})\text{CCC}(=\text{O})\text{O}$                                                                                           |
| 90_496.2  | 16    | 0     | -194.1 | 34.9  | $4 \text{ CO}_2 + 10 \text{ H}_2 \rightarrow 6 \text{ H}_2\text{O} + 2 \text{ CC}=\text{O}$                                                                                                                      |
| 90_496.4  | 16    | 0     | -194.1 | 34.9  | $4 \text{ CO}_2 + 10 \text{ H}_2 \rightarrow 6 \text{ H}_2\text{O} + 2 \text{ CC}=\text{O}$                                                                                                                      |
| 90_496.6  | 16    | 1     | -179.5 | 34.9  | $4 \text{ CO}_2 + 9 \text{ H}_2 \rightarrow \text{CC}(=\text{O})\text{O} + 5 \text{ H}_2\text{O} + \text{CC}=\text{O}$                                                                                           |
| 90_496.8  | 16    | 1     | -179.5 | 39.4  | $4 \text{ CO}_2 + 9 \text{ H}_2 \rightarrow \text{CC}(=\text{O})\text{O} + 5 \text{ H}_2\text{O} + \text{CC}=\text{O}$                                                                                           |
| 90_496.10 | 16    | 1     | -179.5 | 39.4  | $4 \text{ CO}_2 + 9 \text{ H}_2 \rightarrow \text{CC}(=\text{O})\text{O} + 5 \text{ H}_2\text{O} + \text{CC}=\text{O}$                                                                                           |
| 90_496.12 | 16    | 0     | -194.1 | 34.9  | $4 \text{ CO}_2 + 10 \text{ H}_2 \rightarrow 6 \text{ H}_2\text{O} + 2 \text{ CC}=\text{O}$                                                                                                                      |

| Label     | $n_M$ | $n_B$ | $E_C$  | $E_H$ | Net reaction                                                                                                           |
|-----------|-------|-------|--------|-------|------------------------------------------------------------------------------------------------------------------------|
| 90_496_14 | 16    | 0     | -194.1 | 34.9  | $4 \text{ CO}_2 + 10 \text{ H}_2 \rightarrow 6 \text{ H}_2\text{O} + 2 \text{ CC}=\text{O}$                            |
| 90_496_16 | 16    | 1     | -179.5 | 34.9  | $4 \text{ CO}_2 + 9 \text{ H}_2 \rightarrow \text{CC}(=\text{O})\text{O} + 5 \text{ H}_2\text{O} + \text{CC}=\text{O}$ |
| 90_496_18 | 16    | 1     | -179.5 | 39.4  | $4 \text{ CO}_2 + 9 \text{ H}_2 \rightarrow \text{CC}(=\text{O})\text{O} + 5 \text{ H}_2\text{O} + \text{CC}=\text{O}$ |
| 90_496_20 | 16    | 1     | -179.5 | 39.4  | $4 \text{ CO}_2 + 9 \text{ H}_2 \rightarrow \text{CC}(=\text{O})\text{O} + 5 \text{ H}_2\text{O} + \text{CC}=\text{O}$ |
| 90_496_22 | 16    | 0     | -194.1 | 34.9  | $4 \text{ CO}_2 + 10 \text{ H}_2 \rightarrow 6 \text{ H}_2\text{O} + 2 \text{ CC}=\text{O}$                            |
| 90_496_24 | 16    | 0     | -194.1 | 34.9  | $4 \text{ CO}_2 + 10 \text{ H}_2 \rightarrow 6 \text{ H}_2\text{O} + 2 \text{ CC}=\text{O}$                            |
| 90_496_26 | 16    | 1     | -179.5 | 34.9  | $4 \text{ CO}_2 + 9 \text{ H}_2 \rightarrow \text{CC}(=\text{O})\text{O} + 5 \text{ H}_2\text{O} + \text{CC}=\text{O}$ |
| 90_496_28 | 16    | 1     | -179.5 | 39.4  | $4 \text{ CO}_2 + 9 \text{ H}_2 \rightarrow \text{CC}(=\text{O})\text{O} + 5 \text{ H}_2\text{O} + \text{CC}=\text{O}$ |
| 90_496_30 | 16    | 1     | -179.5 | 39.4  | $4 \text{ CO}_2 + 9 \text{ H}_2 \rightarrow \text{CC}(=\text{O})\text{O} + 5 \text{ H}_2\text{O} + \text{CC}=\text{O}$ |
